# Supplementary material
Source: PubMed Central journal article supplement (PMC6201253)

# Quality of cryo-EM reconstruction assessed by atomic model building

Joshua Mendez<sup>1</sup>, and Scott Stagg<sup>2,3</sup>

## **Affiliations:**

<sup>1</sup> Department of Physics, 77 Chieftan Way, Tallahassee, FL 32306.

<sup>2</sup> Institute of Molecular Biophysics, 91 Chieftain Way, Florida State University, Tallahassee, FL 32306.

<sup>3</sup> Department of Chemistry and Biochemistry, 95 Chieftain Way, Florida State University, Tallahassee, FL 32306.

*Proteasome*

Combined score

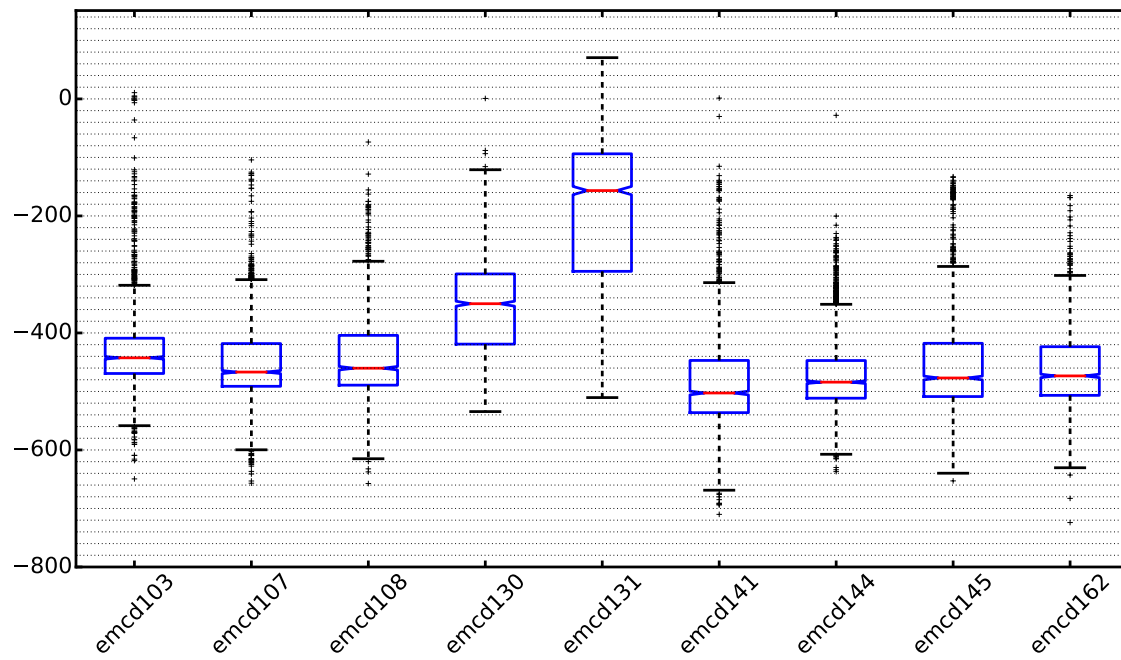

Internal RMSD

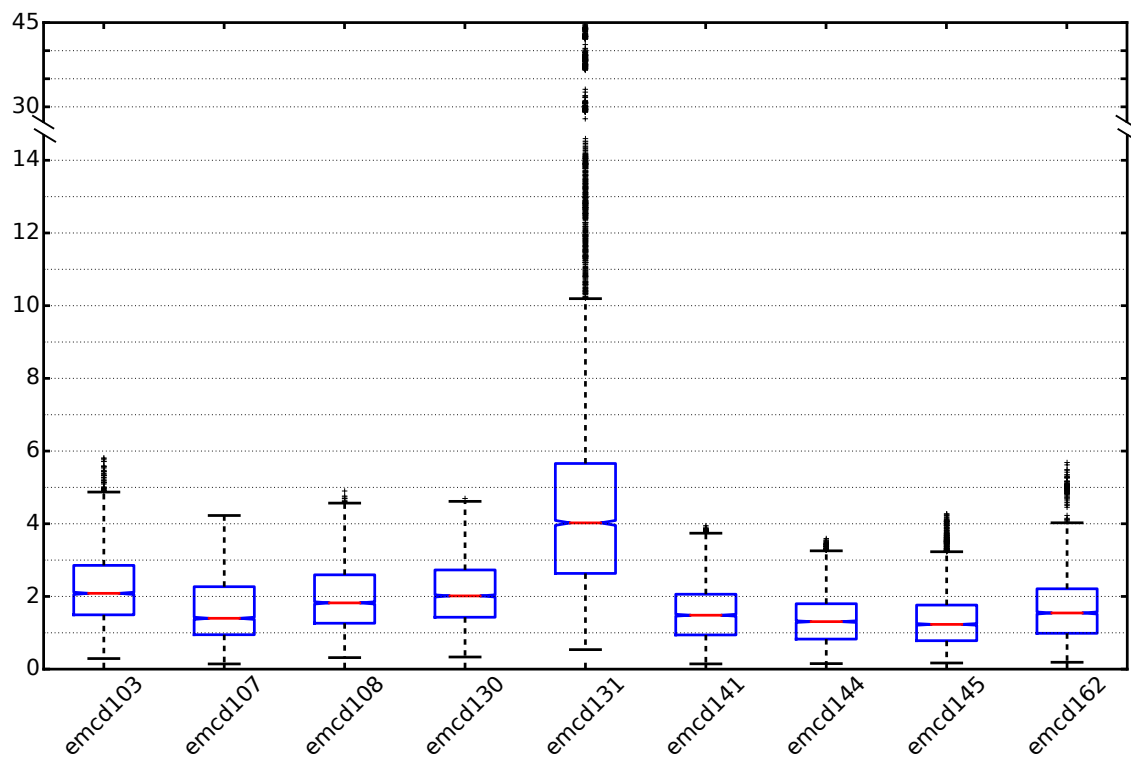



*Apo-Ferritin*

Combined score

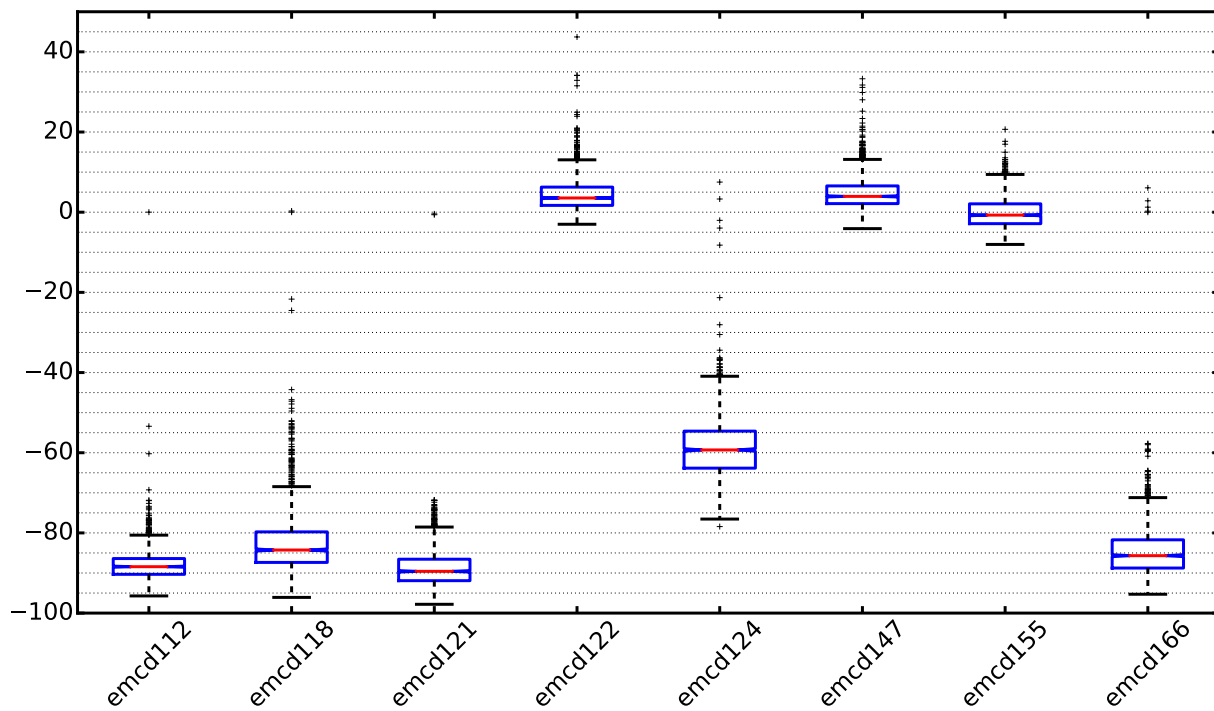

Internal RMSD

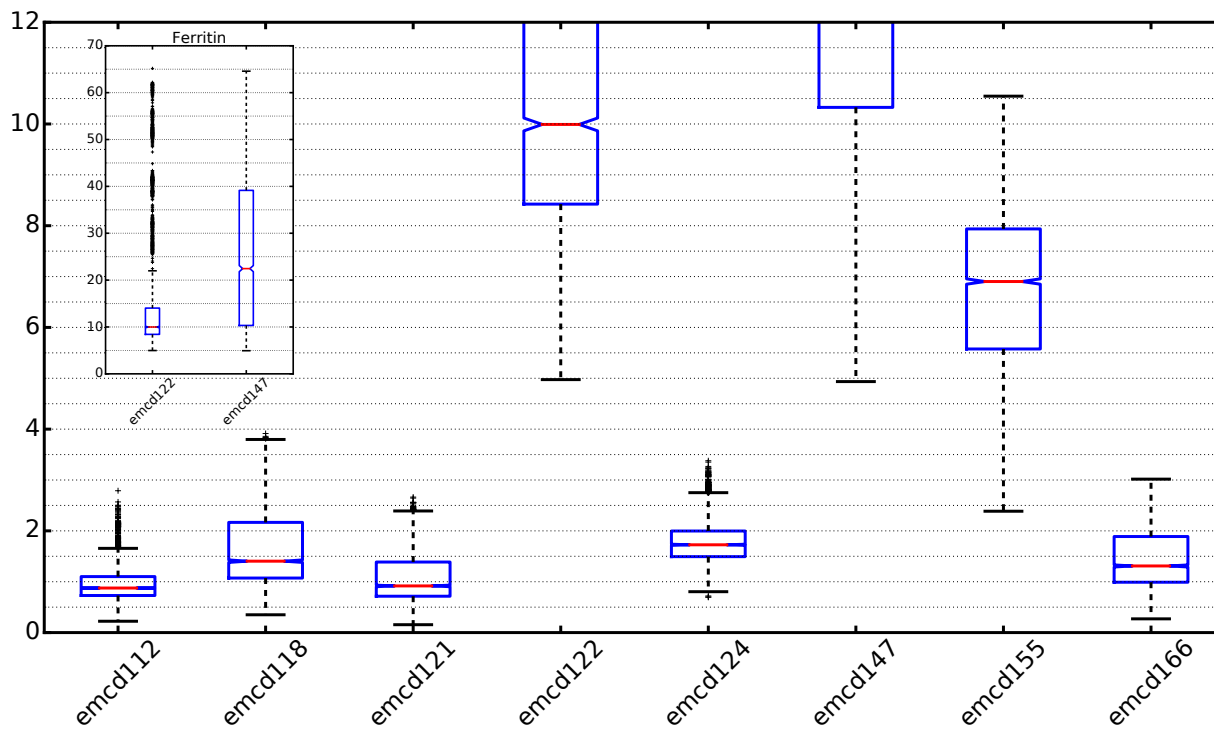



## TRPV1

Models emcd146 and emcd156 could not be automatically modeled without extensive manual intervention, so they were excluded from our analysis.

### Combined score

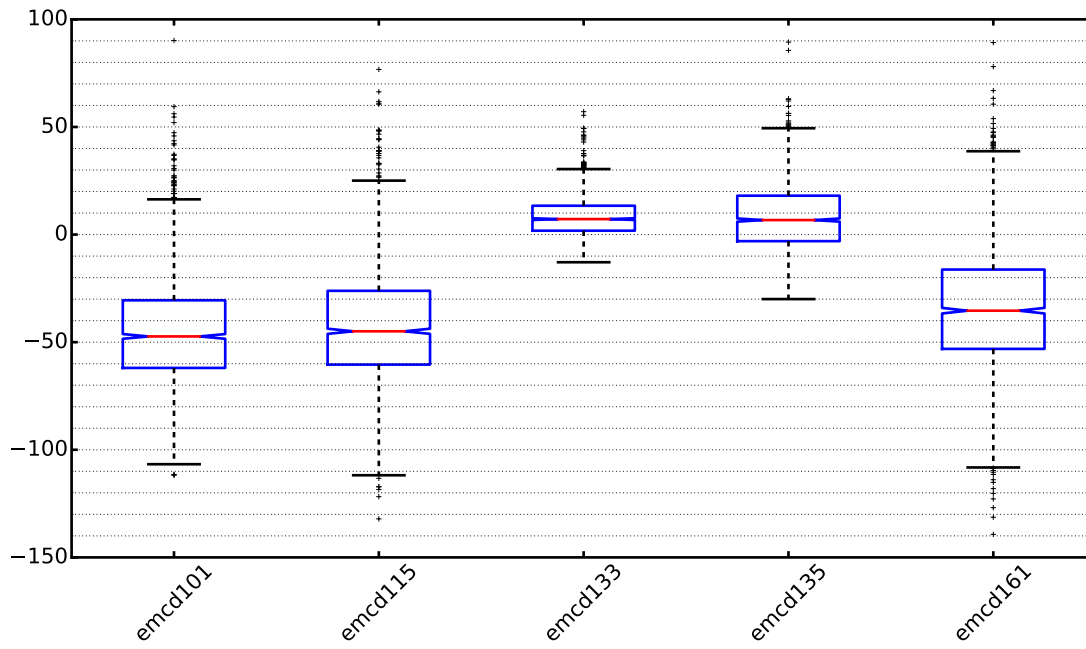

### Internal RMSD

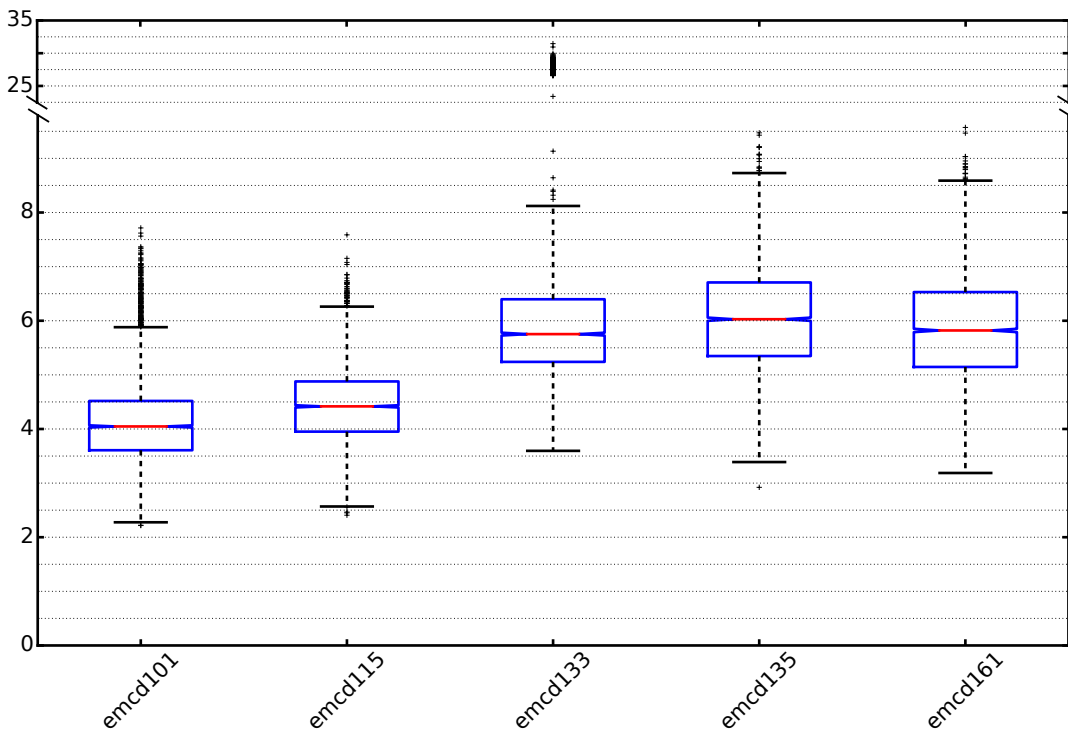

**TRPV1**

|         | Combined Score | Internal RMSD |
|---------|----------------|---------------|
| emcd101 | 1              | 1             |
| emcd115 | 2              | 2             |
| emcd133 | 4 / 5          | 3 / 4         |
| emcd135 | 4 / 5          | 5             |
| emcd161 | 3              | 3 / 4         |

Kruskal-Wallis rank sum test  
 Dunn's Test pairwise comparisons  
 p-value = 0.05

|         | emcd101 | emcd115 | emcd133 | emcd135 | emcd161 | Combine Score |
|---------|---------|---------|---------|---------|---------|---------------|
| emcd101 |         | <0.0001 | <0.0001 | <0.0001 | <0.0001 |               |
| emcd115 | <0.0001 |         | <0.0001 | <0.0001 | <0.0001 |               |
| emcd133 | <0.0001 | <0.0001 |         | <0.0001 | <0.0001 |               |
| emcd135 | <0.0001 | <0.0001 | 0.1290  |         | <0.0001 |               |
| emcd161 | <0.0001 | <0.0001 | <0.0001 | <0.0001 |         |               |

|         | emcd101 | emcd115 | emcd133 | emcd135 | emcd161 | Internal RMSD |
|---------|---------|---------|---------|---------|---------|---------------|
| emcd101 |         | <0.0001 | <0.0001 | <0.0001 | <0.0001 |               |
| emcd115 | <0.0001 |         | <0.0001 | <0.0001 | <0.0001 |               |
| emcd133 | <0.0001 | <0.0001 |         | <0.0001 | 0.0560  |               |
| emcd135 | <0.0001 | <0.0001 | <0.0001 |         | <0.0001 |               |
| emcd161 | <0.0001 | <0.0001 | 0.0560  | <0.0001 |         |               |

## 80S Ribosome

Model emcd111 could not be automatically modeled without extensive manual intervention, so it was excluded from our analysis.

### Combined score

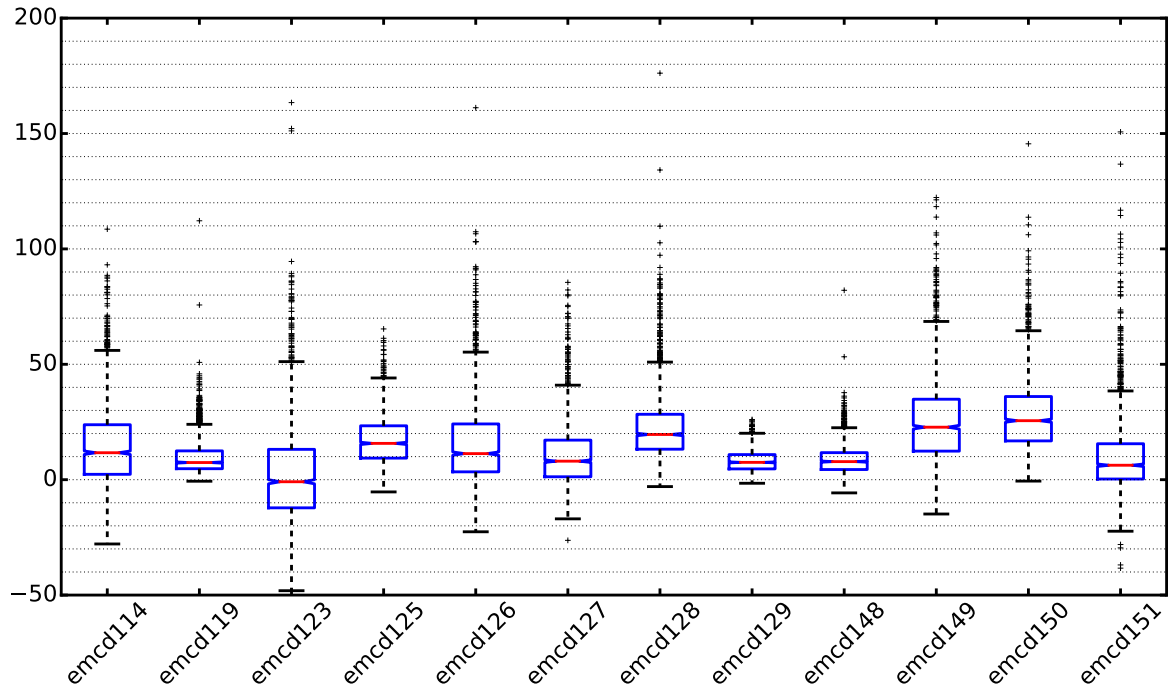

### Internal RMSD

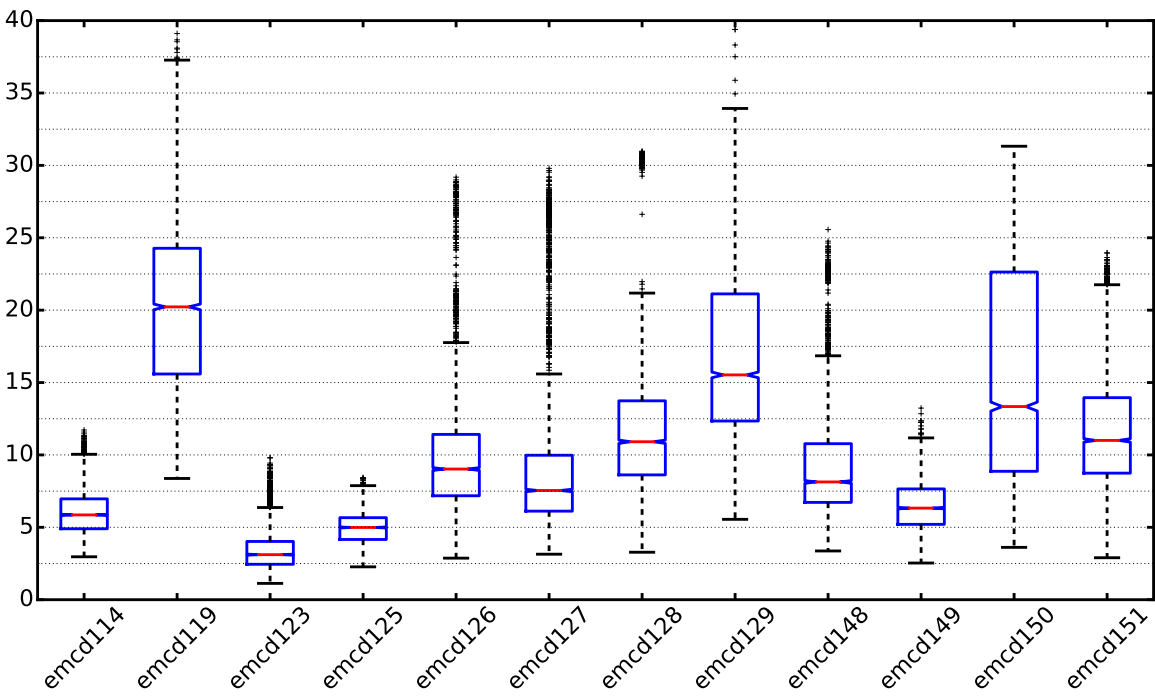



**80S Ribosome**

|         | Combined Score | Internal RMSD |
|---------|----------------|---------------|
| emcd114 | 7 / 8          | 3             |
| emcd119 | 4 / 6          | 12            |
| emcd123 | 1              | 1             |
| emcd125 | 9              | 2             |
| emcd127 | 7 / 8          | 7             |
| emcd126 | 4 / 6          | 5             |
| emcd128 | 10 / 11        | 8 / 9         |
| emcd129 | 2 / 3 / 5      | 11            |
| emcd148 | 2 / 3 / 5      | 6             |
| emcd149 | 10 / 11        | 4             |
| emcd150 | 12             | 10            |
| emcd151 | 2 / 3 / 5      | 8 / 9         |

Kruskal-Wallis rank sum test  
 Dunn's Test pairwise comparisons  
 p-value = 0.05

|         | emcd114 | emcd119 | emcd123 | emcd125 | emcd126 | emcd127 | emcd128 | emcd129 | emcd148 | emcd149 | emcd150 | emcd151 |
|---------|---------|---------|---------|---------|---------|---------|---------|---------|---------|---------|---------|---------|
| emcd114 |         | <0.0001 | <0.0001 | <0.0001 | 0.1309  | <0.0001 | <0.0001 | <0.0001 | <0.0001 | <0.0001 | <0.0001 | <0.0001 |
| emcd119 | <0.0001 |         | <0.0001 | <0.0001 | <0.0001 | 0.1309  | <0.0001 | 0.0001  | 0.0069  | <0.0001 | <0.0001 | 0.0037  |
| emcd123 | <0.0001 | <0.0001 |         | <0.0001 | <0.0001 | <0.0001 | <0.0001 | <0.0001 | <0.0001 | <0.0001 | <0.0001 | <0.0001 |
| emcd125 | <0.0001 | <0.0001 | <0.0001 |         | <0.0001 | <0.0001 | <0.0001 | <0.0001 | <0.0001 | <0.0001 | <0.0001 | <0.0001 |
| emcd126 | 0.1309  | <0.0001 | <0.0001 | <0.0001 |         | <0.0001 | <0.0001 | <0.0001 | <0.0001 | <0.0001 | <0.0001 | <0.0001 |
| emcd127 | <0.0001 | 0.2627  | <0.0001 | <0.0001 | <0.0001 |         | <0.0001 | <0.0001 | 0.0010  | <0.0001 | <0.0001 | 0.0027  |
| emcd128 | <0.0001 | <0.0001 | <0.0001 | <0.0001 | <0.0001 | <0.0001 |         | <0.0001 | <0.0001 | 0.1812  | <0.0001 | <0.0001 |
| emcd129 | <0.0001 | 0.0001  | <0.0001 | <0.0001 | <0.0001 | <0.0001 | <0.0001 |         | 0.0826  | <0.0001 | <0.0001 | 0.1208  |
| emcd148 | <0.0001 | 0.0069  | <0.0001 | <0.0001 | <0.0001 | 0.0010  | <0.0001 | 0.0826  |         | <0.0001 | <0.0001 | 0.4144  |
| emcd149 | <0.0001 | <0.0001 | <0.0001 | <0.0001 | <0.0001 | <0.0001 | 0.1812  | <0.0001 | <0.0001 |         | <0.0001 | <0.0001 |
| emcd150 | <0.0001 | <0.0001 | <0.0001 | <0.0001 | <0.0001 | <0.0001 | <0.0001 | <0.0001 | <0.0001 | <0.0001 |         | <0.0001 |
| emcd151 | <0.0001 | 0.0037  | <0.0001 | <0.0001 | <0.0001 | 0.0027  | <0.0001 | 0.1208  | 0.4144  | <0.0001 | <0.0001 |         |

Combine Score

|         | emcd114 | emcd119 | emcd123 | emcd125 | emcd126 | emcd127 | emcd128 | emcd129 | emcd148 | emcd149 | emcd150 | emcd151 |
|---------|---------|---------|---------|---------|---------|---------|---------|---------|---------|---------|---------|---------|
| emcd114 |         | <0.0001 | <0.0001 | <0.0001 | <0.0001 | <0.0001 | <0.0001 | <0.0001 | <0.0001 | <0.0001 | <0.0001 | <0.0001 |
| emcd119 | <0.0001 |         | <0.0001 | <0.0001 | <0.0001 | <0.0001 | <0.0001 | <0.0001 | <0.0001 | <0.0001 | <0.0001 | <0.0001 |
| emcd123 | <0.0001 | <0.0001 |         | <0.0001 | <0.0001 | <0.0001 | <0.0001 | <0.0001 | <0.0001 | <0.0001 | <0.0001 | <0.0001 |
| emcd125 | <0.0001 | <0.0001 | <0.0001 |         | <0.0001 | <0.0001 | <0.0001 | <0.0001 | <0.0001 | <0.0001 | <0.0001 | <0.0001 |
| emcd126 | <0.0001 | <0.0001 | <0.0001 | <0.0001 |         | <0.0001 | <0.0001 | <0.0001 | <0.0001 | <0.0001 | <0.0001 | <0.0001 |
| emcd127 | <0.0001 | <0.0001 | <0.0001 | <0.0001 | <0.0001 |         | <0.0001 | <0.0001 | <0.0001 | <0.0001 | <0.0001 | <0.0001 |
| emcd128 | <0.0001 | <0.0001 | <0.0001 | <0.0001 | <0.0001 | <0.0001 |         | <0.0001 | <0.0001 | <0.0001 | <0.0001 | 0.4341  |
| emcd129 | <0.0001 | <0.0001 | <0.0001 | <0.0001 | <0.0001 | <0.0001 | <0.0001 |         | <0.0001 | <0.0001 | <0.0001 | <0.0001 |
| emcd148 | <0.0001 | <0.0001 | <0.0001 | <0.0001 | <0.0001 | <0.0001 | <0.0001 | <0.0001 |         | <0.0001 | <0.0001 | <0.0001 |
| emcd149 | <0.0001 | <0.0001 | <0.0001 | <0.0001 | <0.0001 | <0.0001 | <0.0001 | <0.0001 | <0.0001 |         | <0.0001 | <0.0001 |
| emcd150 | <0.0001 | <0.0001 | <0.0001 | <0.0001 | <0.0001 | <0.0001 | <0.0001 | <0.0001 | <0.0001 | <0.0001 |         | <0.0001 |
| emcd151 | <0.0001 | <0.0001 | <0.0001 | <0.0001 | <0.0001 | <0.0001 | 0.4341  | <0.0001 | <0.0001 | <0.0001 | <0.0001 |         |

Internal RMSD

*Brome Mosaic Virus*

Combined score

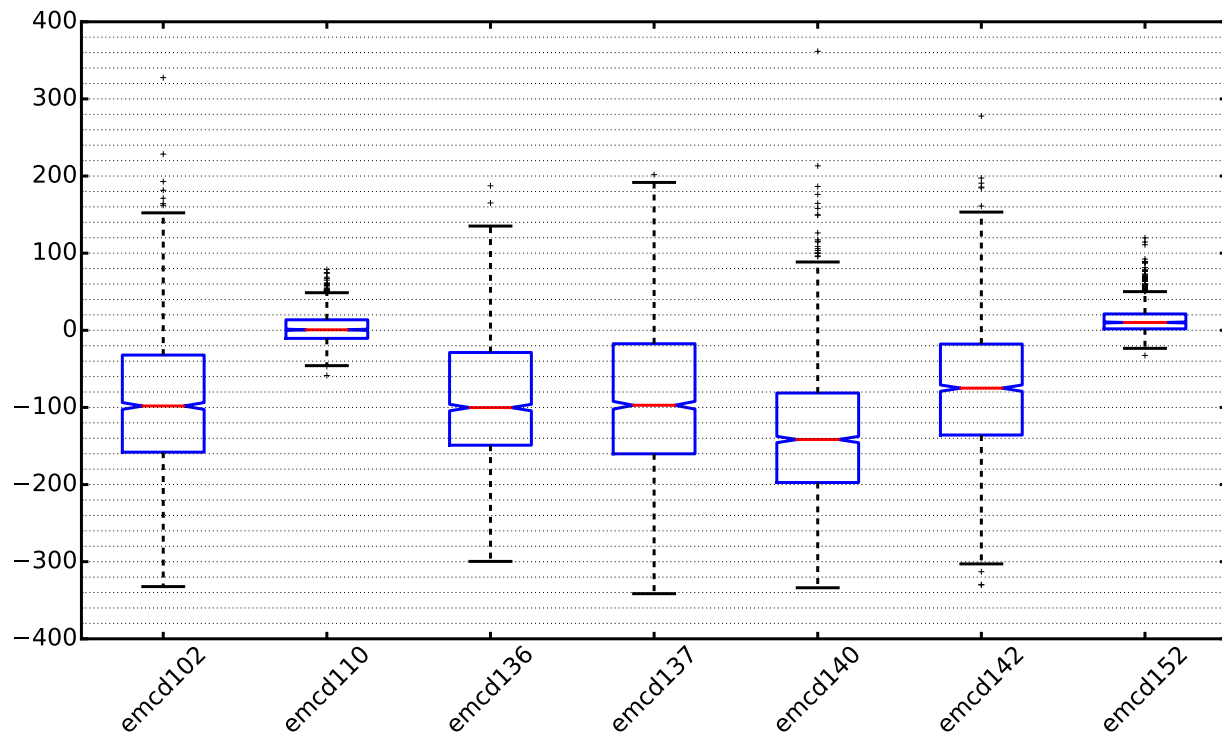

Internal RMSD

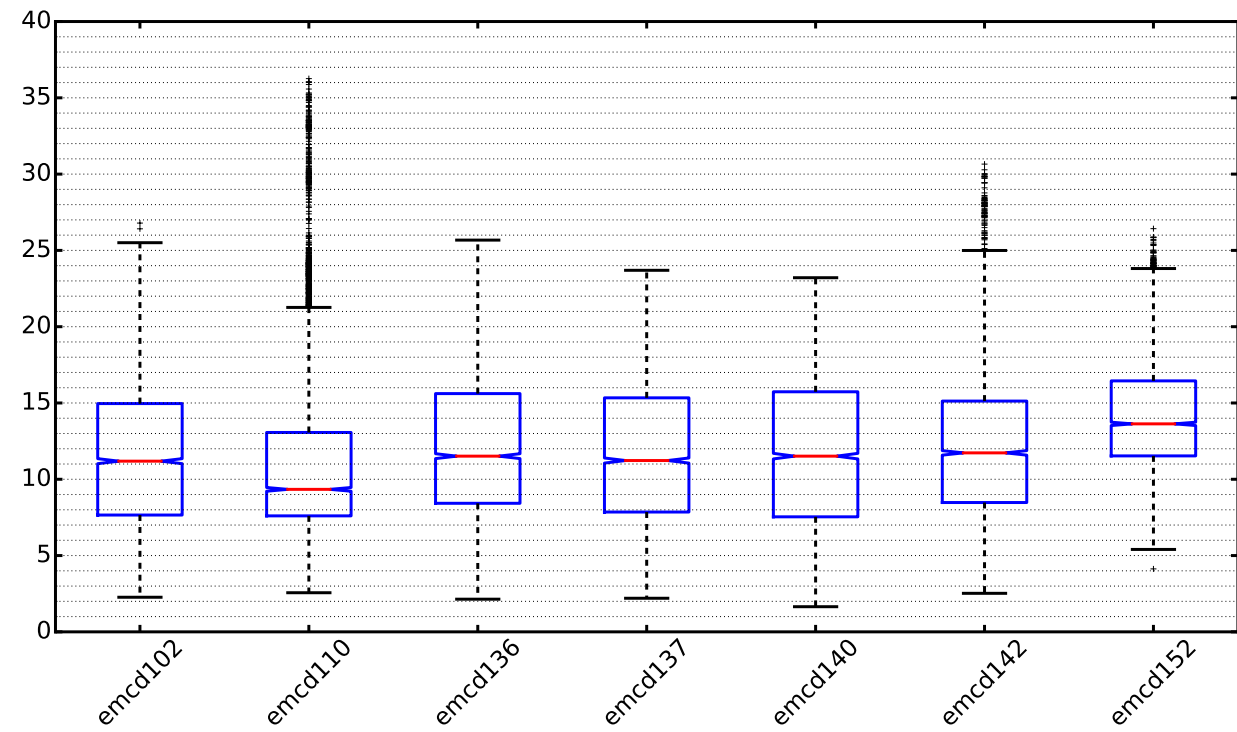



## $\beta$ Galactosidase

Models emcd159, emcd164 and emcd167 could not be automatically modeled without extensive manual intervention, so they were excluded from our analysis.

### Combined score

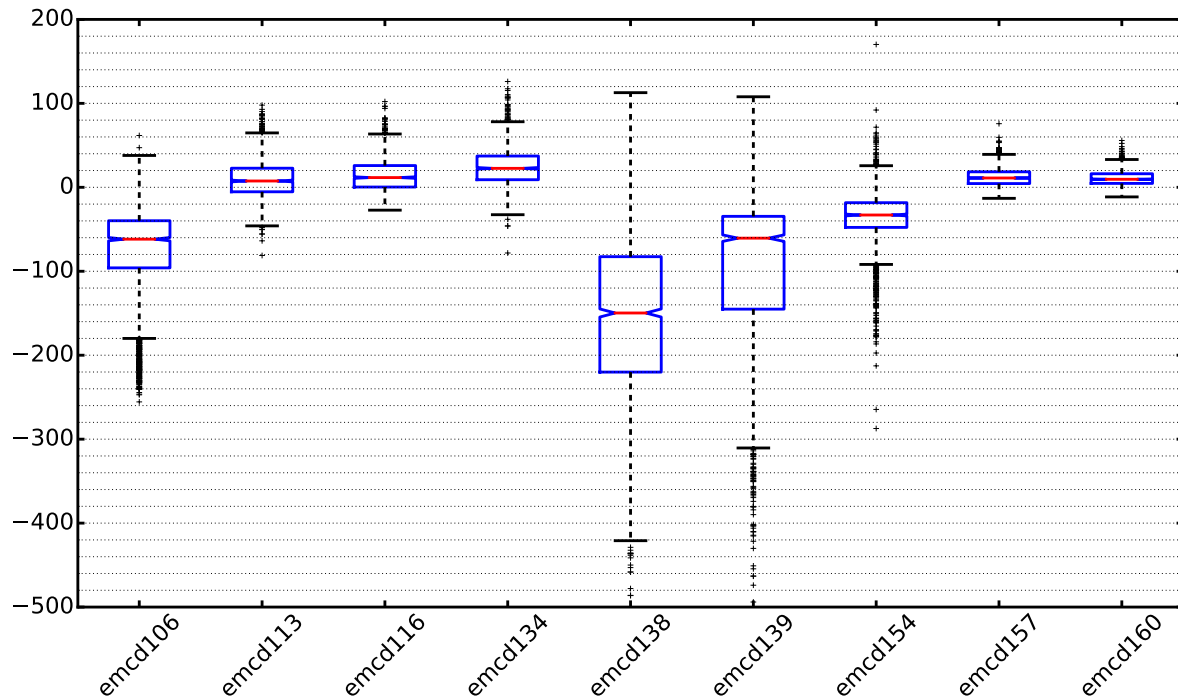

### Internal RMSD

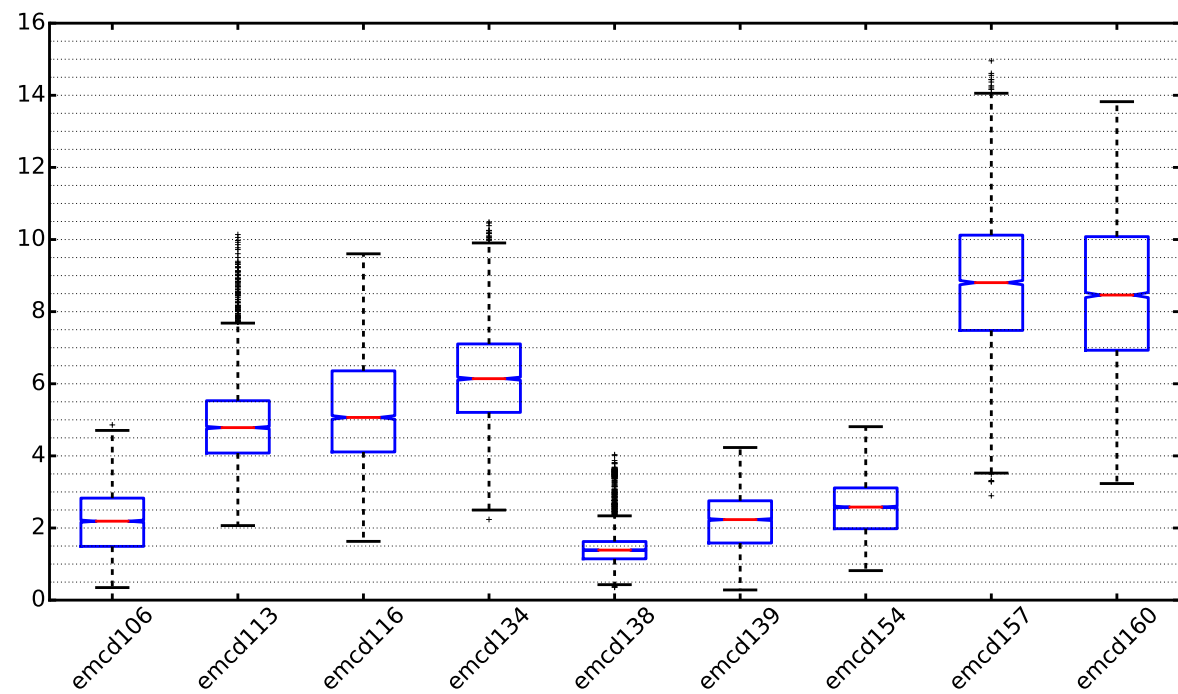

**β Galactosidase**

|         | Combined Score | Internal RMSD |
|---------|----------------|---------------|
| emcd106 | 2 / 3          | 2 / 3         |
| emcd113 | 5              | 5             |
| emcd116 | 6 / 7 / 8      | 6             |
| emcd134 | 9              | 7             |
| emcd138 | 1              | 1             |
| emcd139 | 2 / 3          | 2 / 3         |
| emcd154 | 4              | 4             |
| emcd157 | 6 / 7 / 8      | 9             |
| emcd160 | 6 / 7 / 8      | 8             |

Kruskal-Wallis rank sum test  
 Dunn's Test pairwise comparisons  
 p-value = 0.05

|         | emcd106 | emcd113 | emcd116 | emcd134 | emcd138 | emcd139 | emcd154 | emcd157 | emcd160 |               |
|---------|---------|---------|---------|---------|---------|---------|---------|---------|---------|---------------|
| emcd106 |         | <0.0001 | <0.0001 | <0.0001 | <0.0001 | 0.1914  | <0.0001 | <0.0001 | <0.0001 | Combine Score |
| emcd113 | <0.0001 |         | <0.0001 | <0.0001 | <0.0001 | <0.0001 | <0.0001 | <0.0001 | 0.0018  |               |
| emcd116 | <0.0001 | <0.0001 |         | <0.0001 | <0.0001 | <0.0001 | <0.0001 | 0.43721 | 0.0414  |               |
| emcd134 | <0.0001 | <0.0001 | <0.0001 |         | <0.0001 | <0.0001 | <0.0001 | <0.0001 | <0.0001 |               |
| emcd138 | <0.0001 | <0.0001 | <0.0001 | <0.0001 |         | <0.0001 | <0.0001 | <0.0001 | <0.0001 |               |
| emcd139 | 0.1914  | <0.0001 | <0.0001 | <0.0001 | <0.0001 |         | <0.0001 | <0.0001 | <0.0001 |               |
| emcd154 | <0.0001 | <0.0001 | <0.0001 | <0.0001 | <0.0001 | <0.0001 |         | <0.0001 | <0.0001 |               |
| emcd157 | <0.0001 | <0.0001 | 0.43721 | <0.0001 | <0.0001 | <0.0001 | <0.0001 |         | 0.0575  |               |
| emcd160 | <0.0001 | 0.0018  | 0.0414  | <0.0001 | <0.0001 | <0.0001 | <0.0001 | 0.0575  |         |               |

  

|         | emcd106 | emcd113 | emcd116 | emcd134 | emcd138 | emcd139 | emcd154 | emcd157 | emcd160 |               |
|---------|---------|---------|---------|---------|---------|---------|---------|---------|---------|---------------|
| emcd106 |         | <0.0001 | <0.0001 | <0.0001 | <0.0001 | 0.3433  | <0.0001 | <0.0001 | <0.0001 | Internal RMSD |
| emcd113 | <0.0001 |         | <0.0001 | <0.0001 | <0.0001 | <0.0001 | <0.0001 | <0.0001 | <0.0001 |               |
| emcd116 | <0.0001 | <0.0001 |         | <0.0001 | <0.0001 | <0.0001 | <0.0001 | <0.0001 | <0.0001 |               |
| emcd134 | <0.0001 | <0.0001 | <0.0001 |         | <0.0001 | <0.0001 | <0.0001 | <0.0001 | <0.0001 |               |
| emcd138 | <0.0001 | <0.0001 | <0.0001 | <0.0001 |         | <0.0001 | <0.0001 | <0.0001 | <0.0001 |               |
| emcd139 | 0.3433  | <0.0001 | <0.0001 | <0.0001 | <0.0001 |         | <0.0001 | <0.0001 | <0.0001 |               |
| emcd154 | <0.0001 | <0.0001 | <0.0001 | <0.0001 | <0.0001 | <0.0001 |         | <0.0001 | <0.0001 |               |
| emcd157 | <0.0001 | <0.0001 | <0.0001 | <0.0001 | <0.0001 | <0.0001 | <0.0001 |         | 0.0001  |               |
| emcd160 | <0.0001 | <0.0001 | <0.0001 | <0.0001 | <0.0001 | <0.0001 | <0.0001 | 0.0001  |         |               |

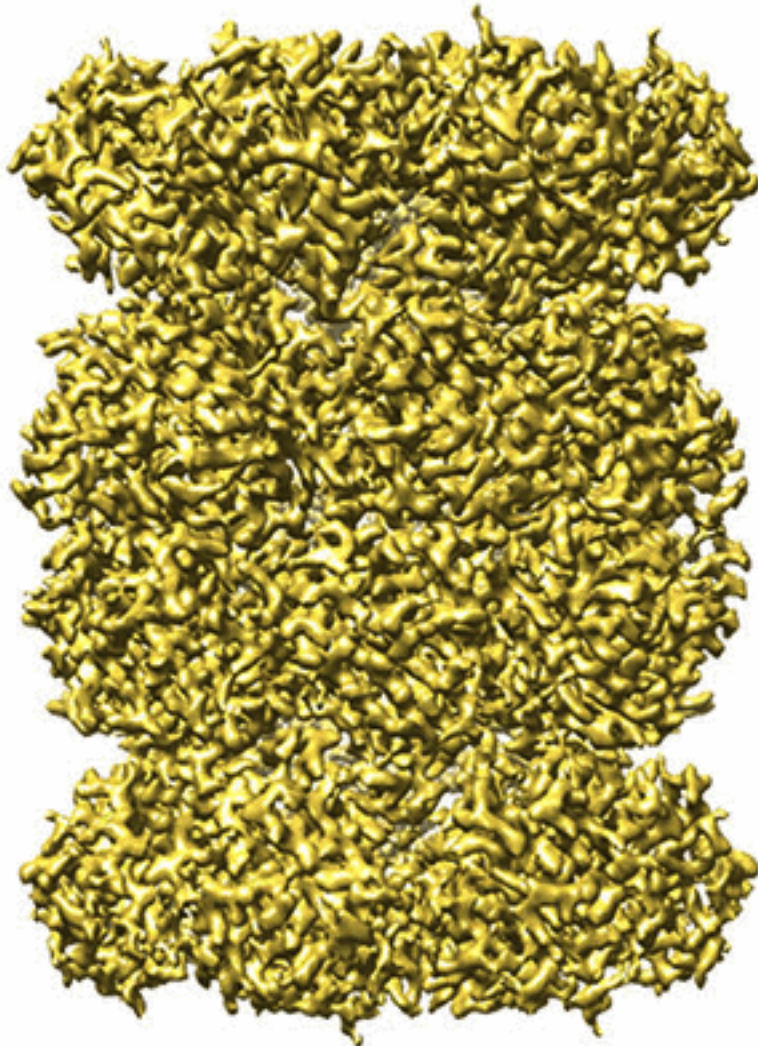

Score vs rms [103]

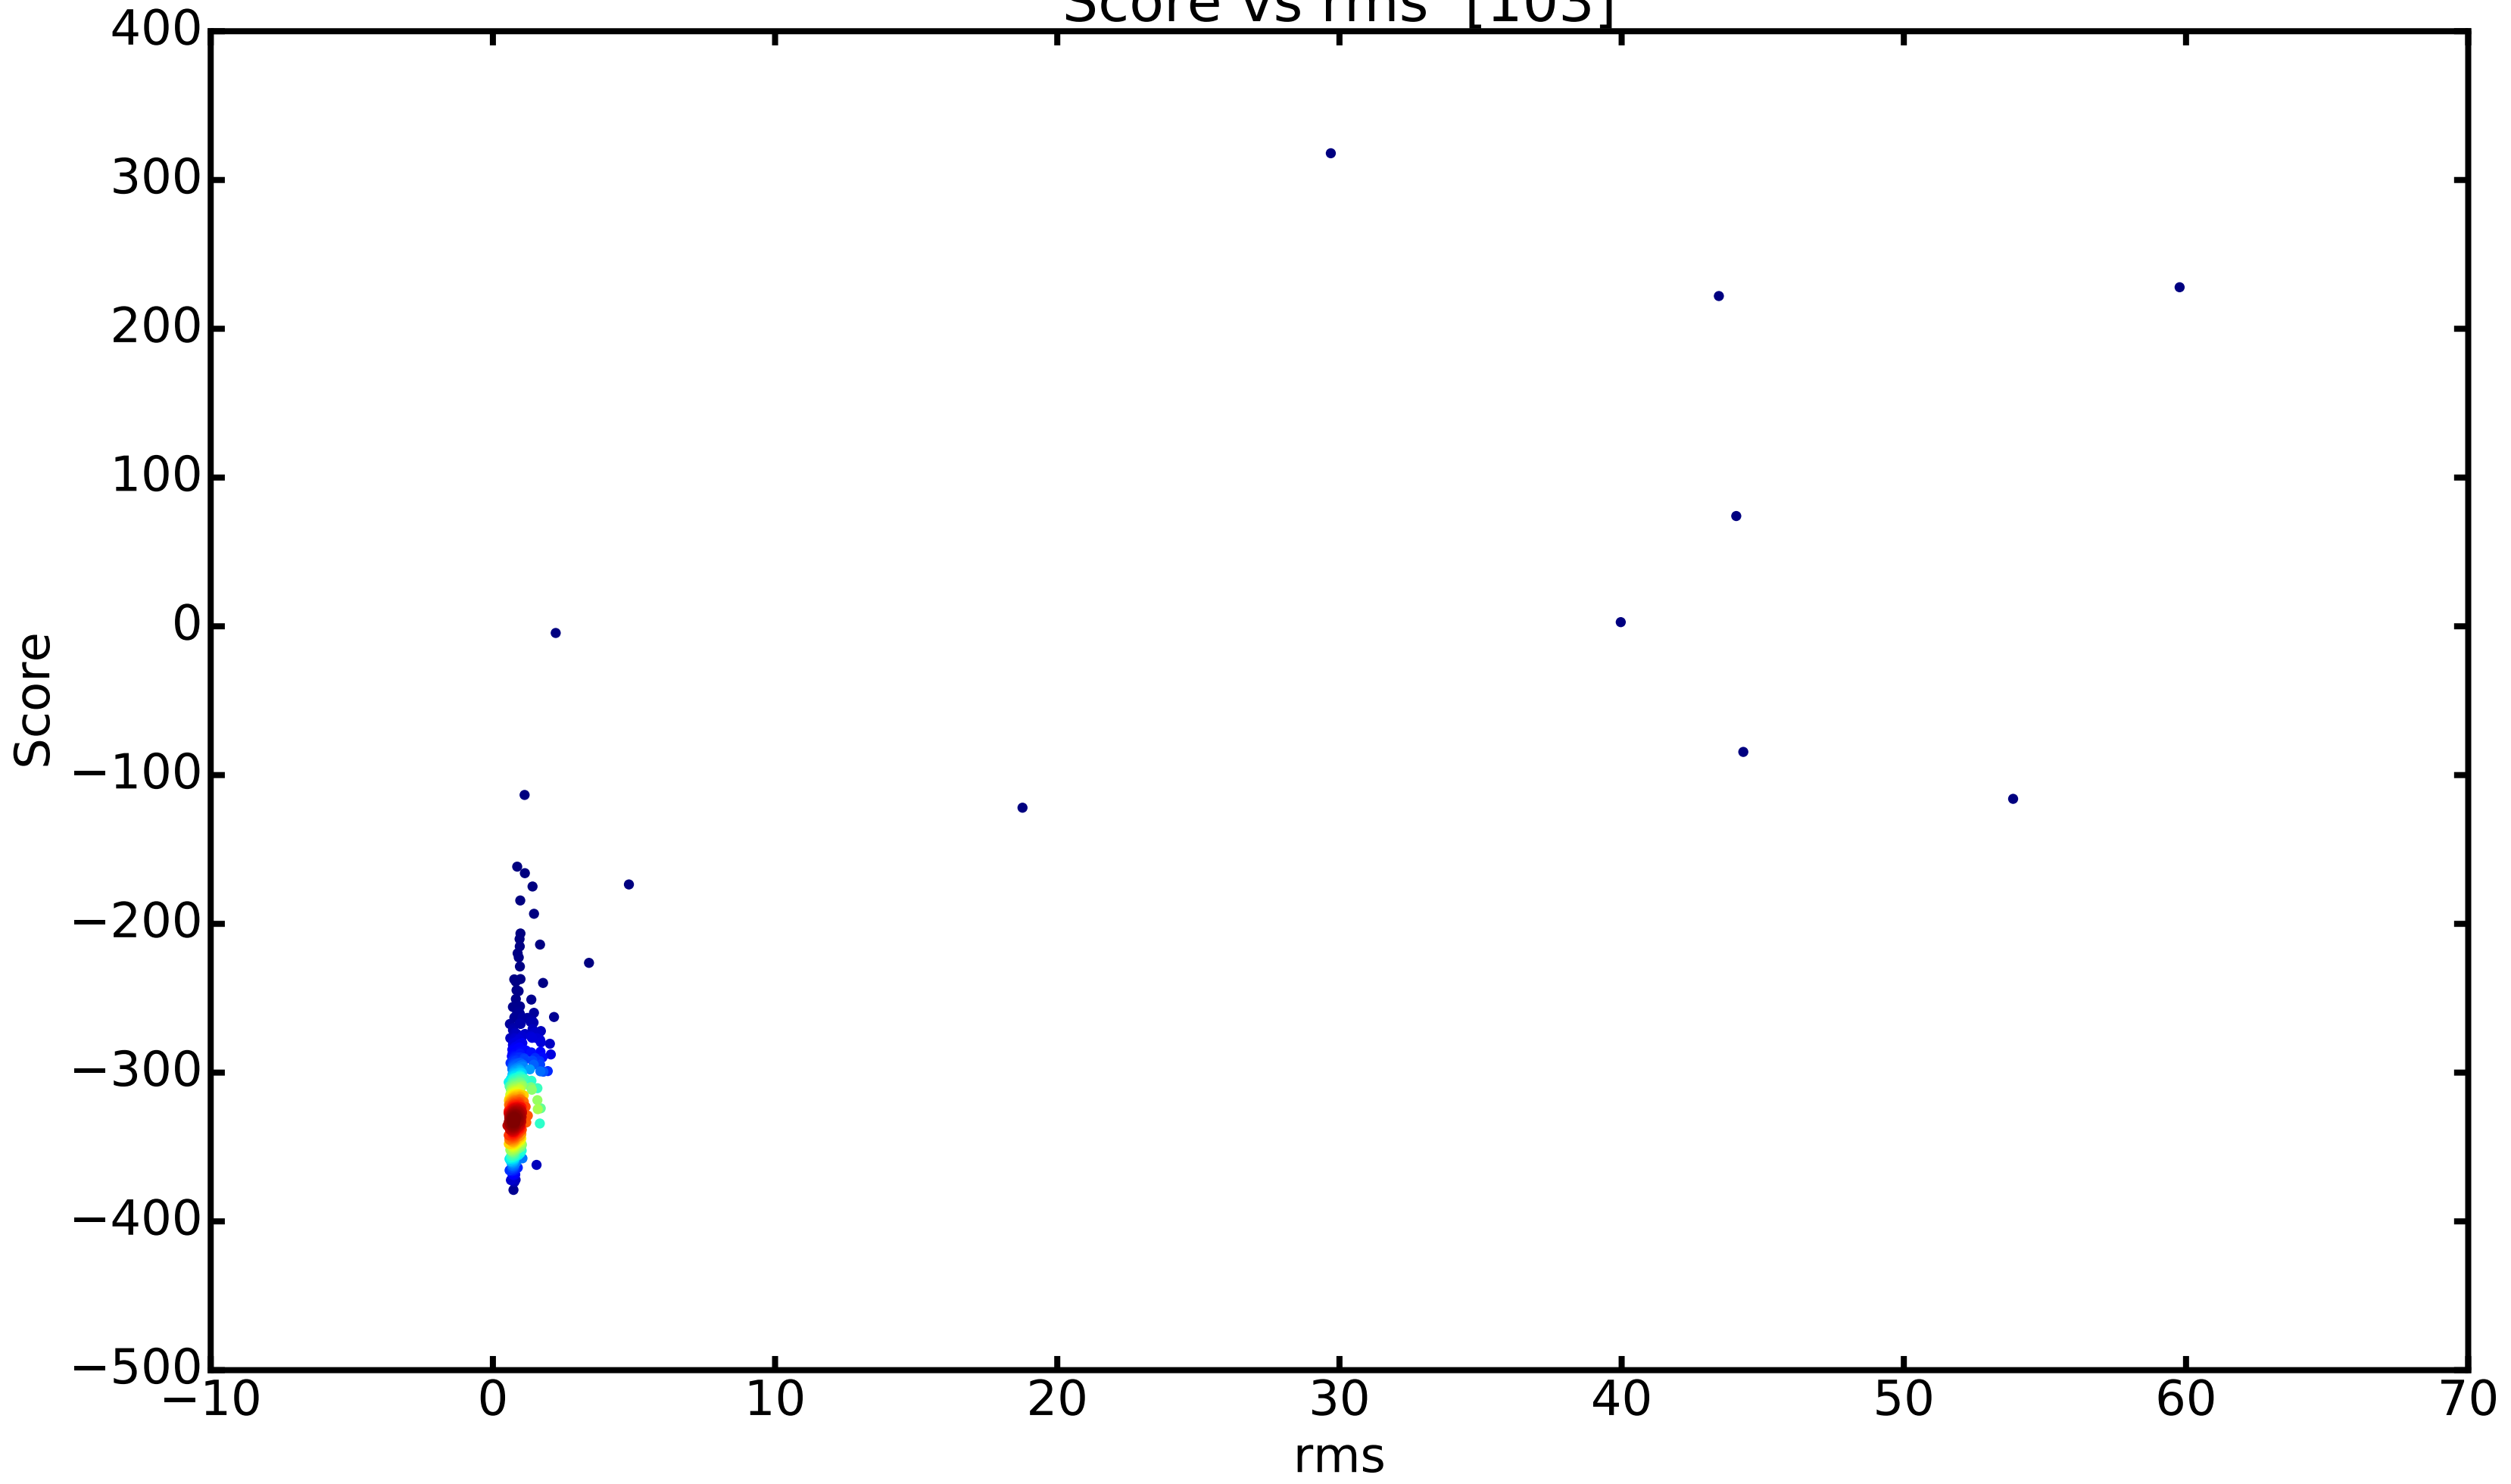

Score vs rms [103]

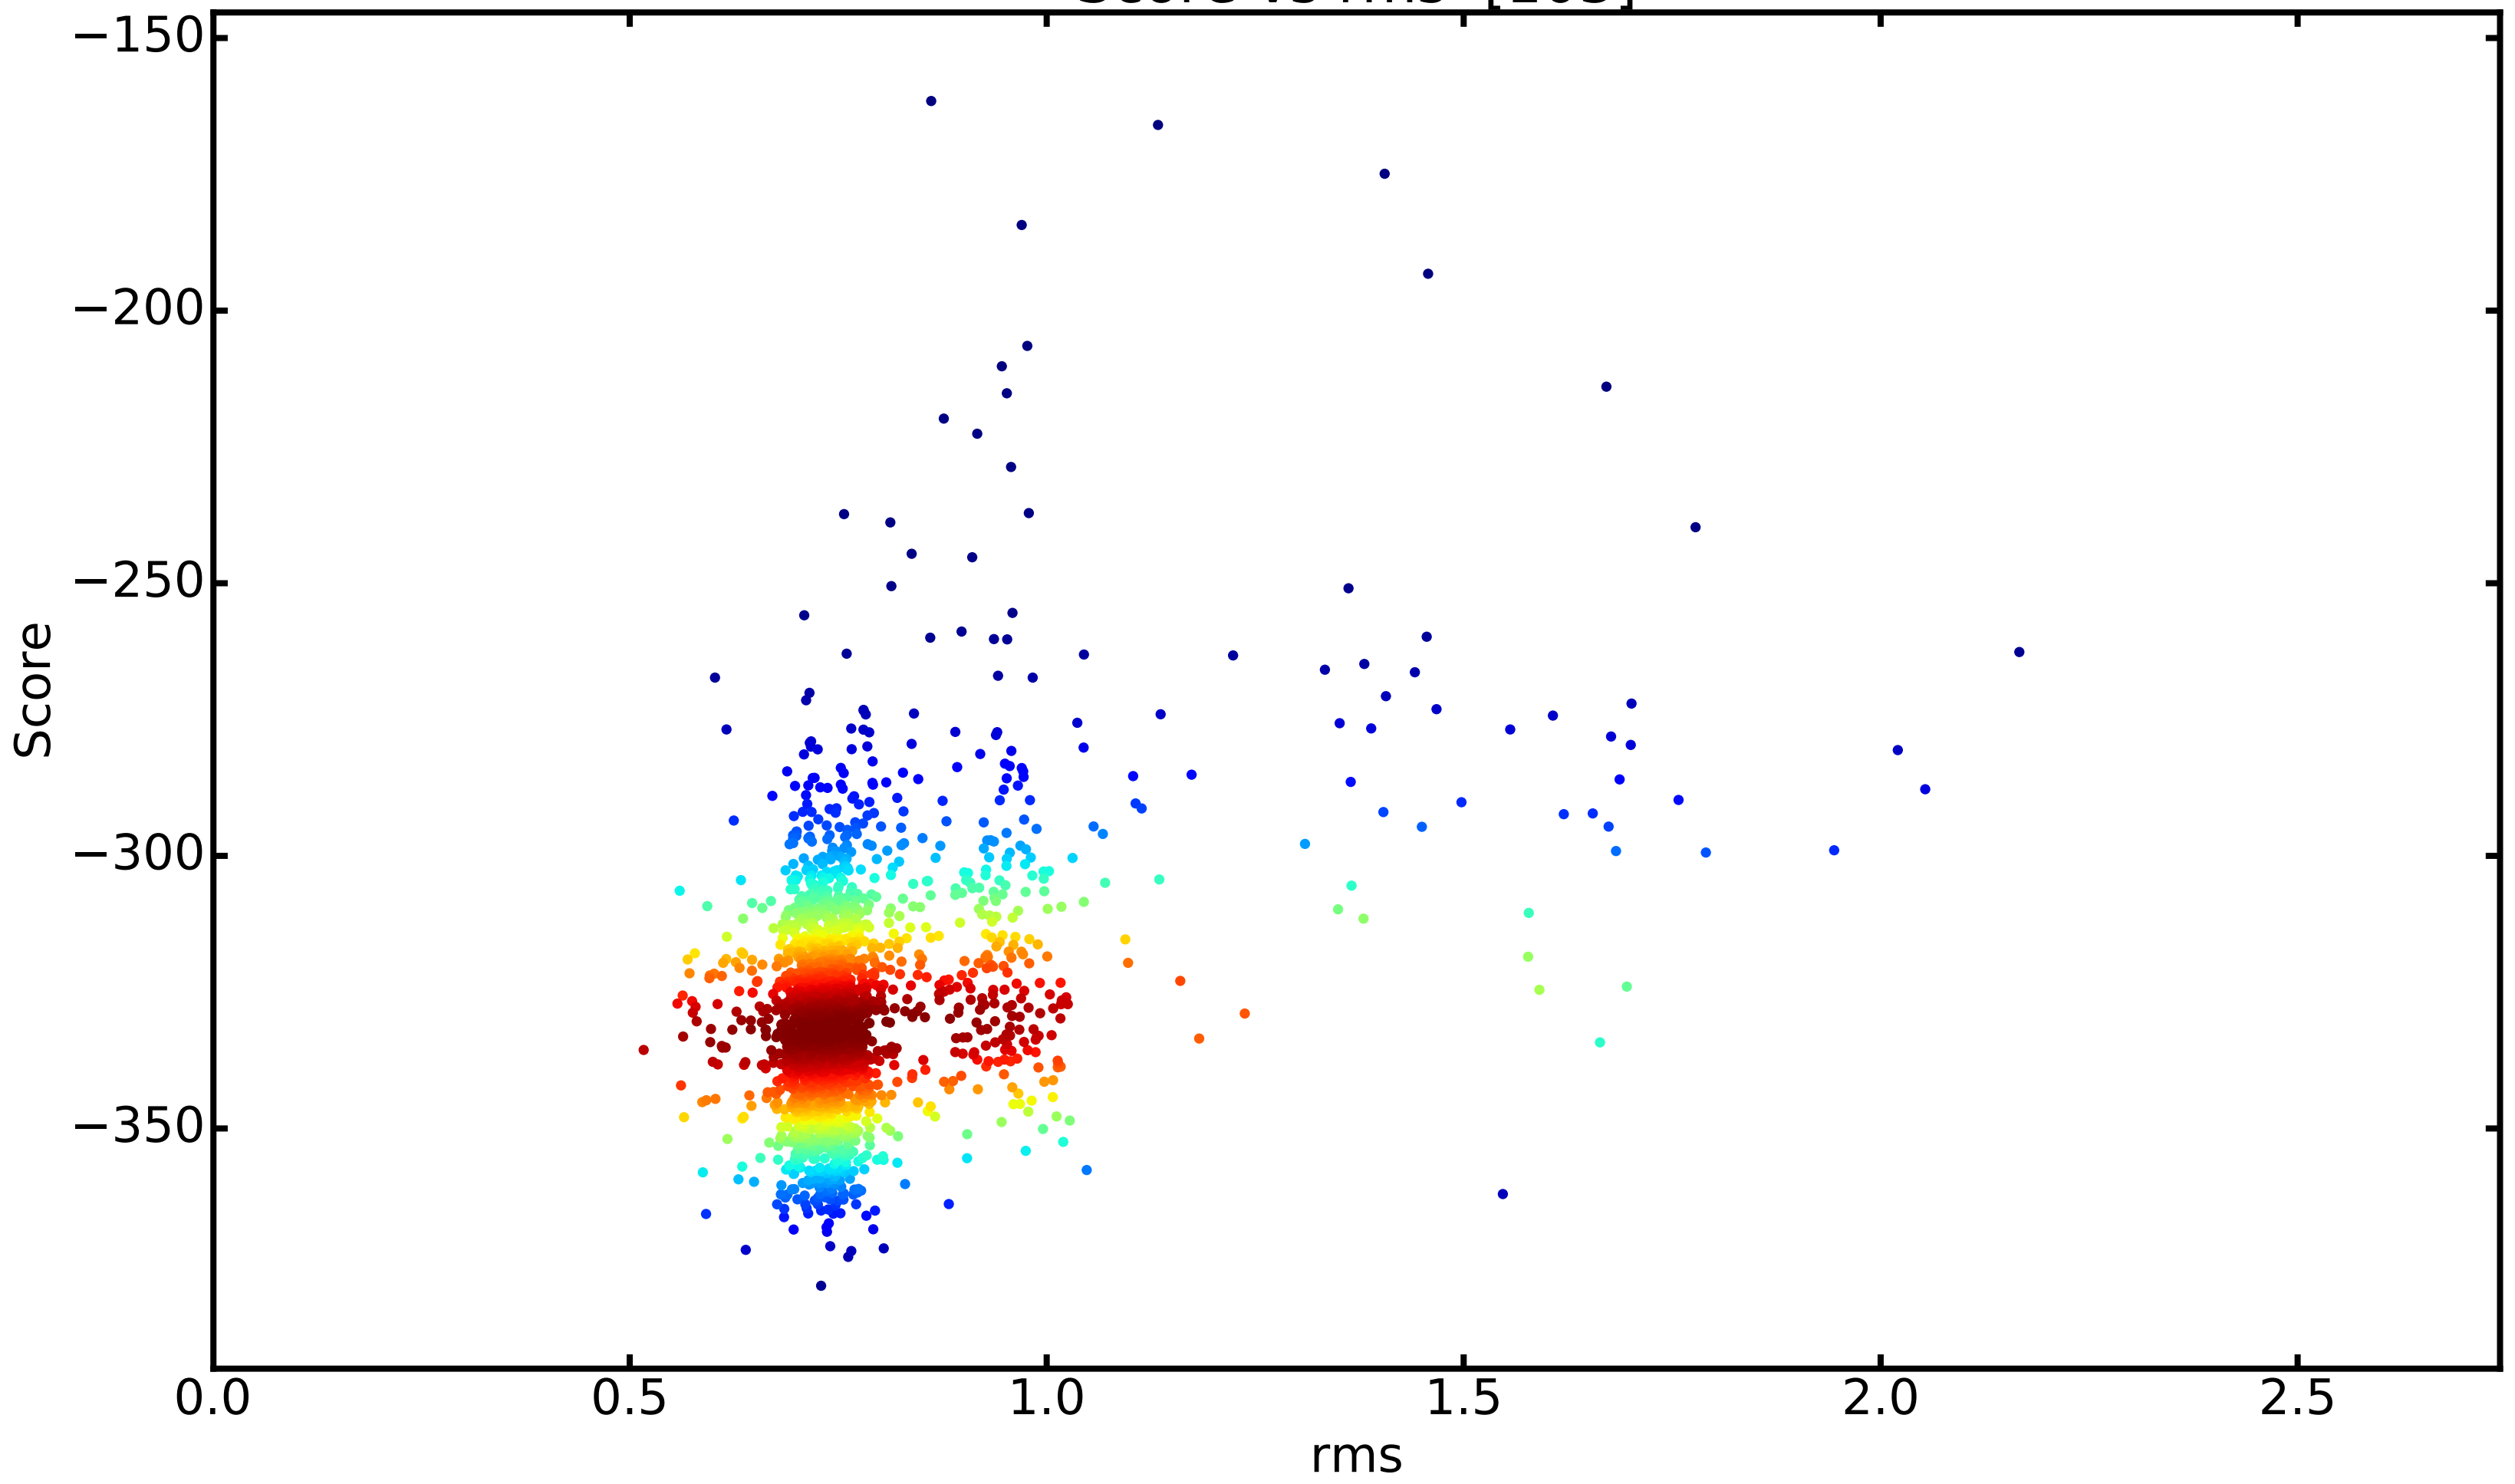



Score vs rms [107]

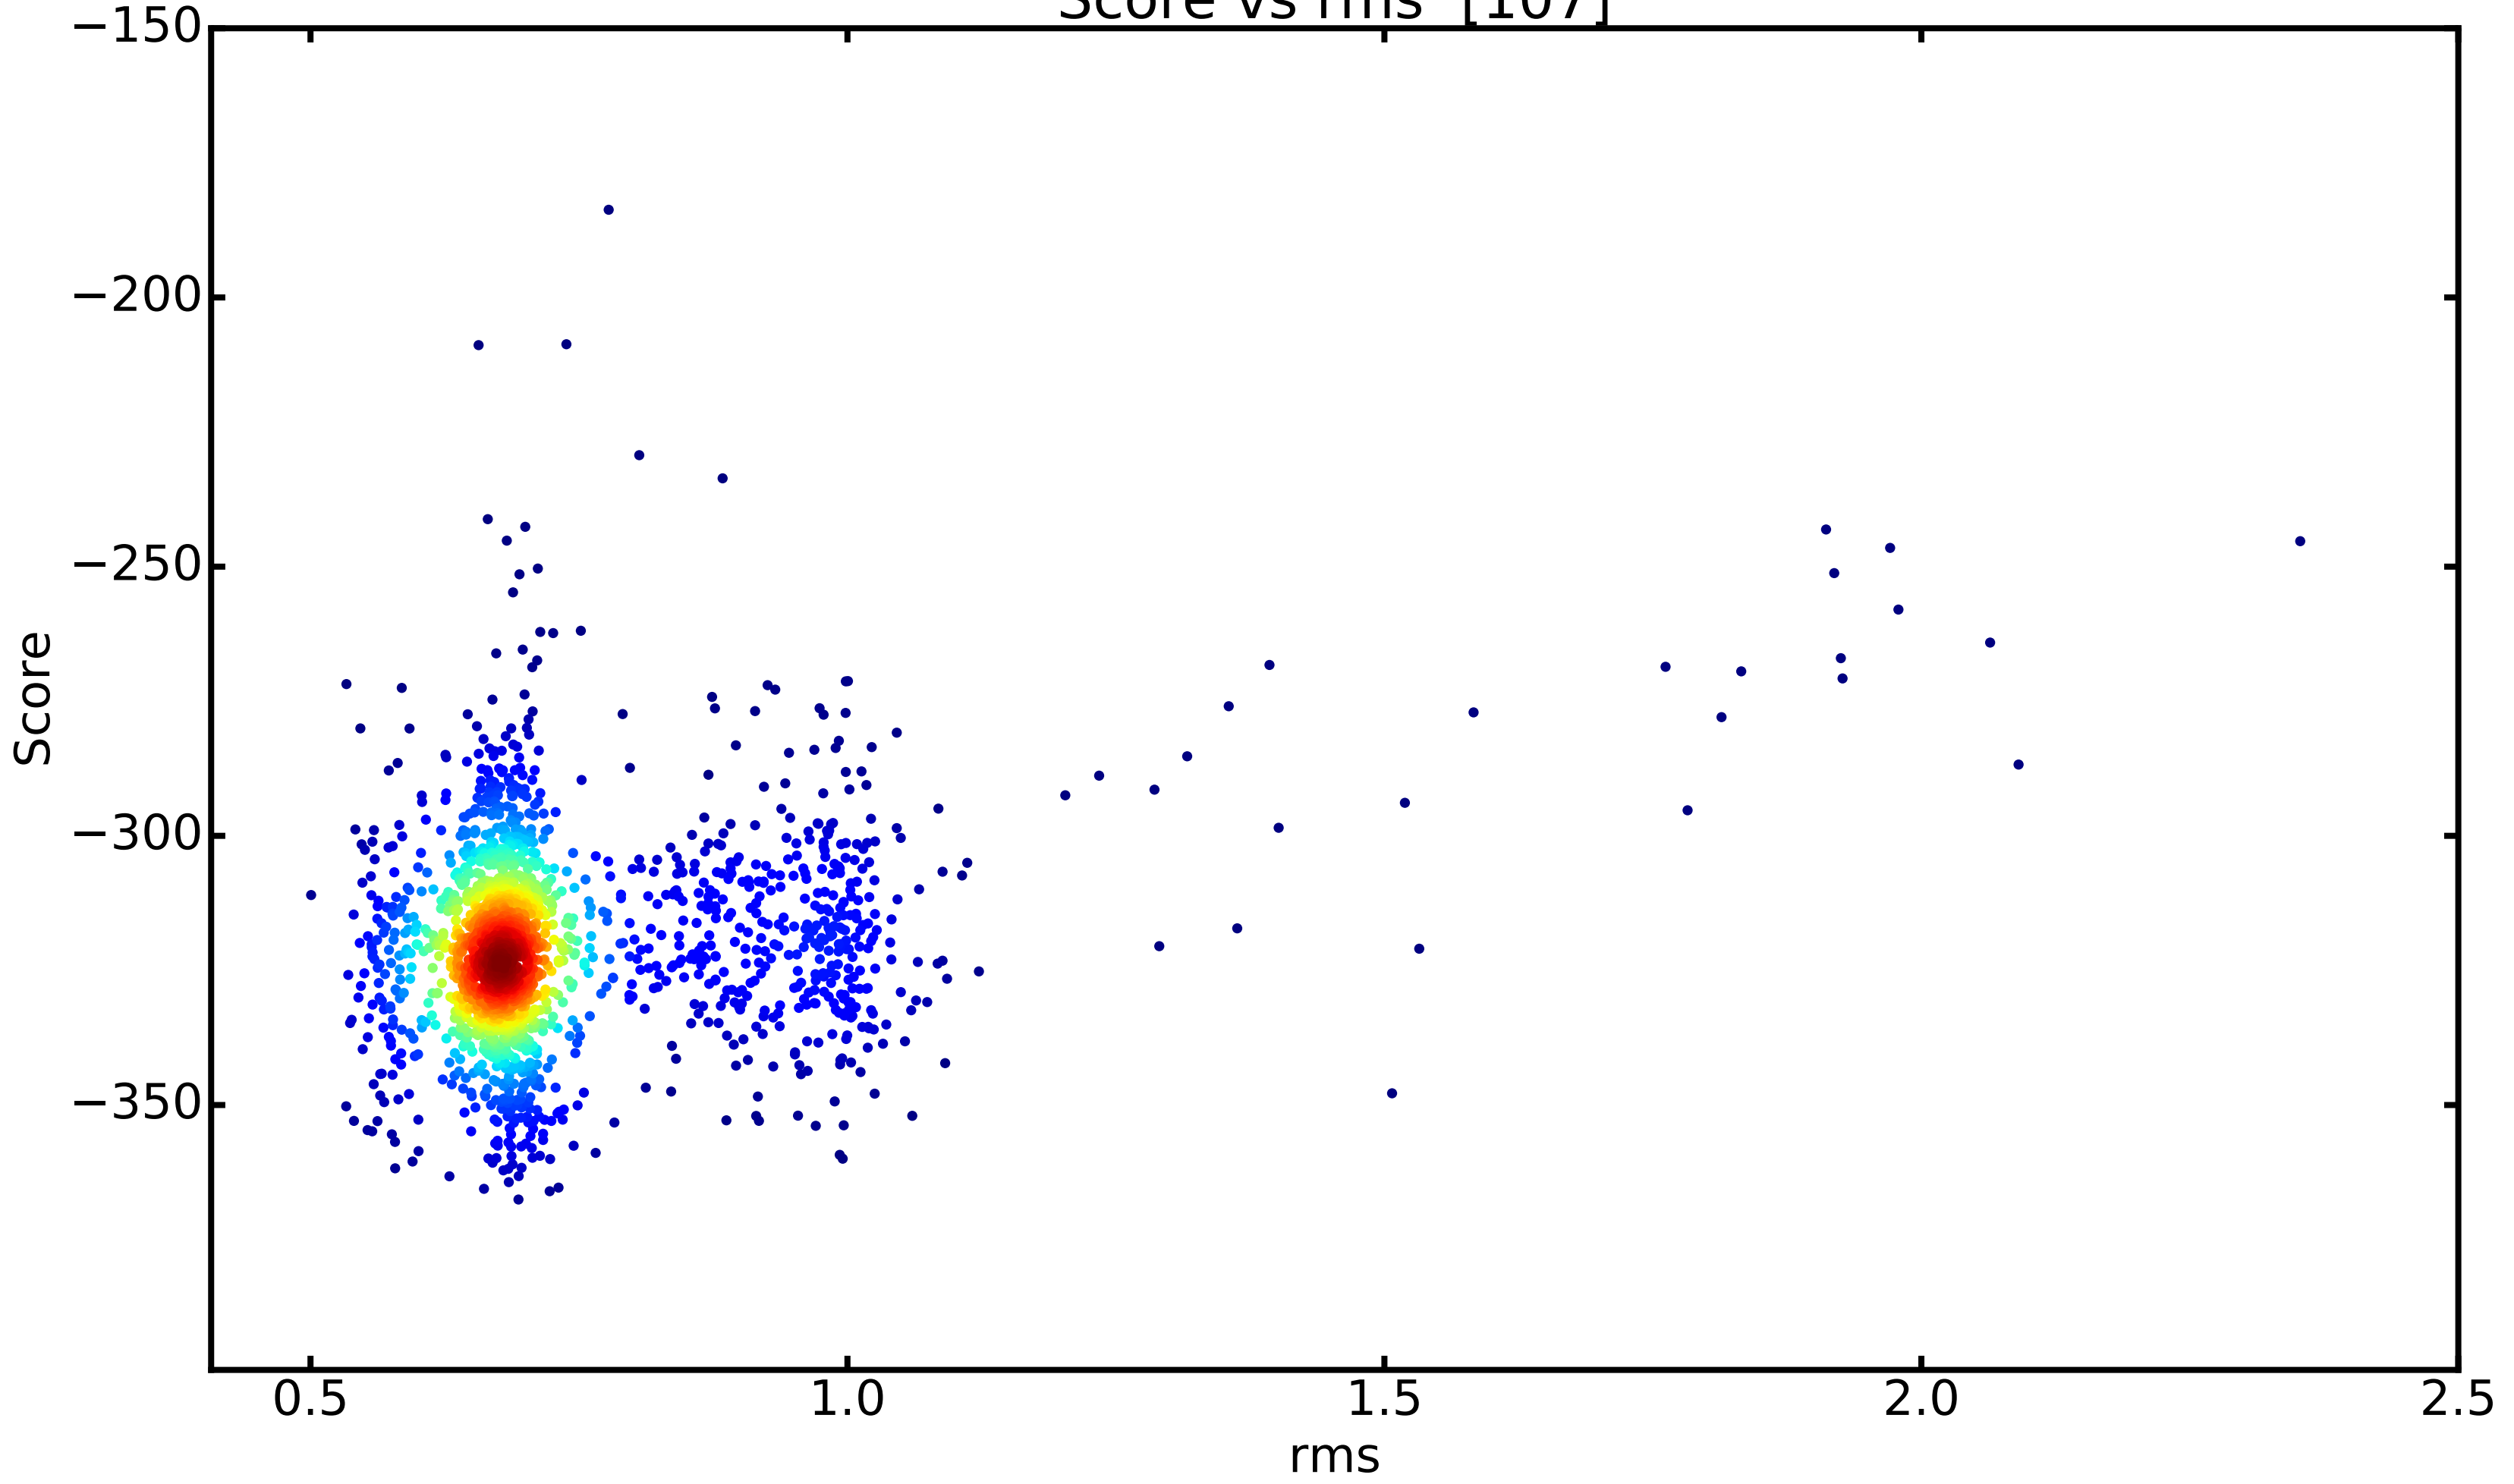

Score vs rms [107]

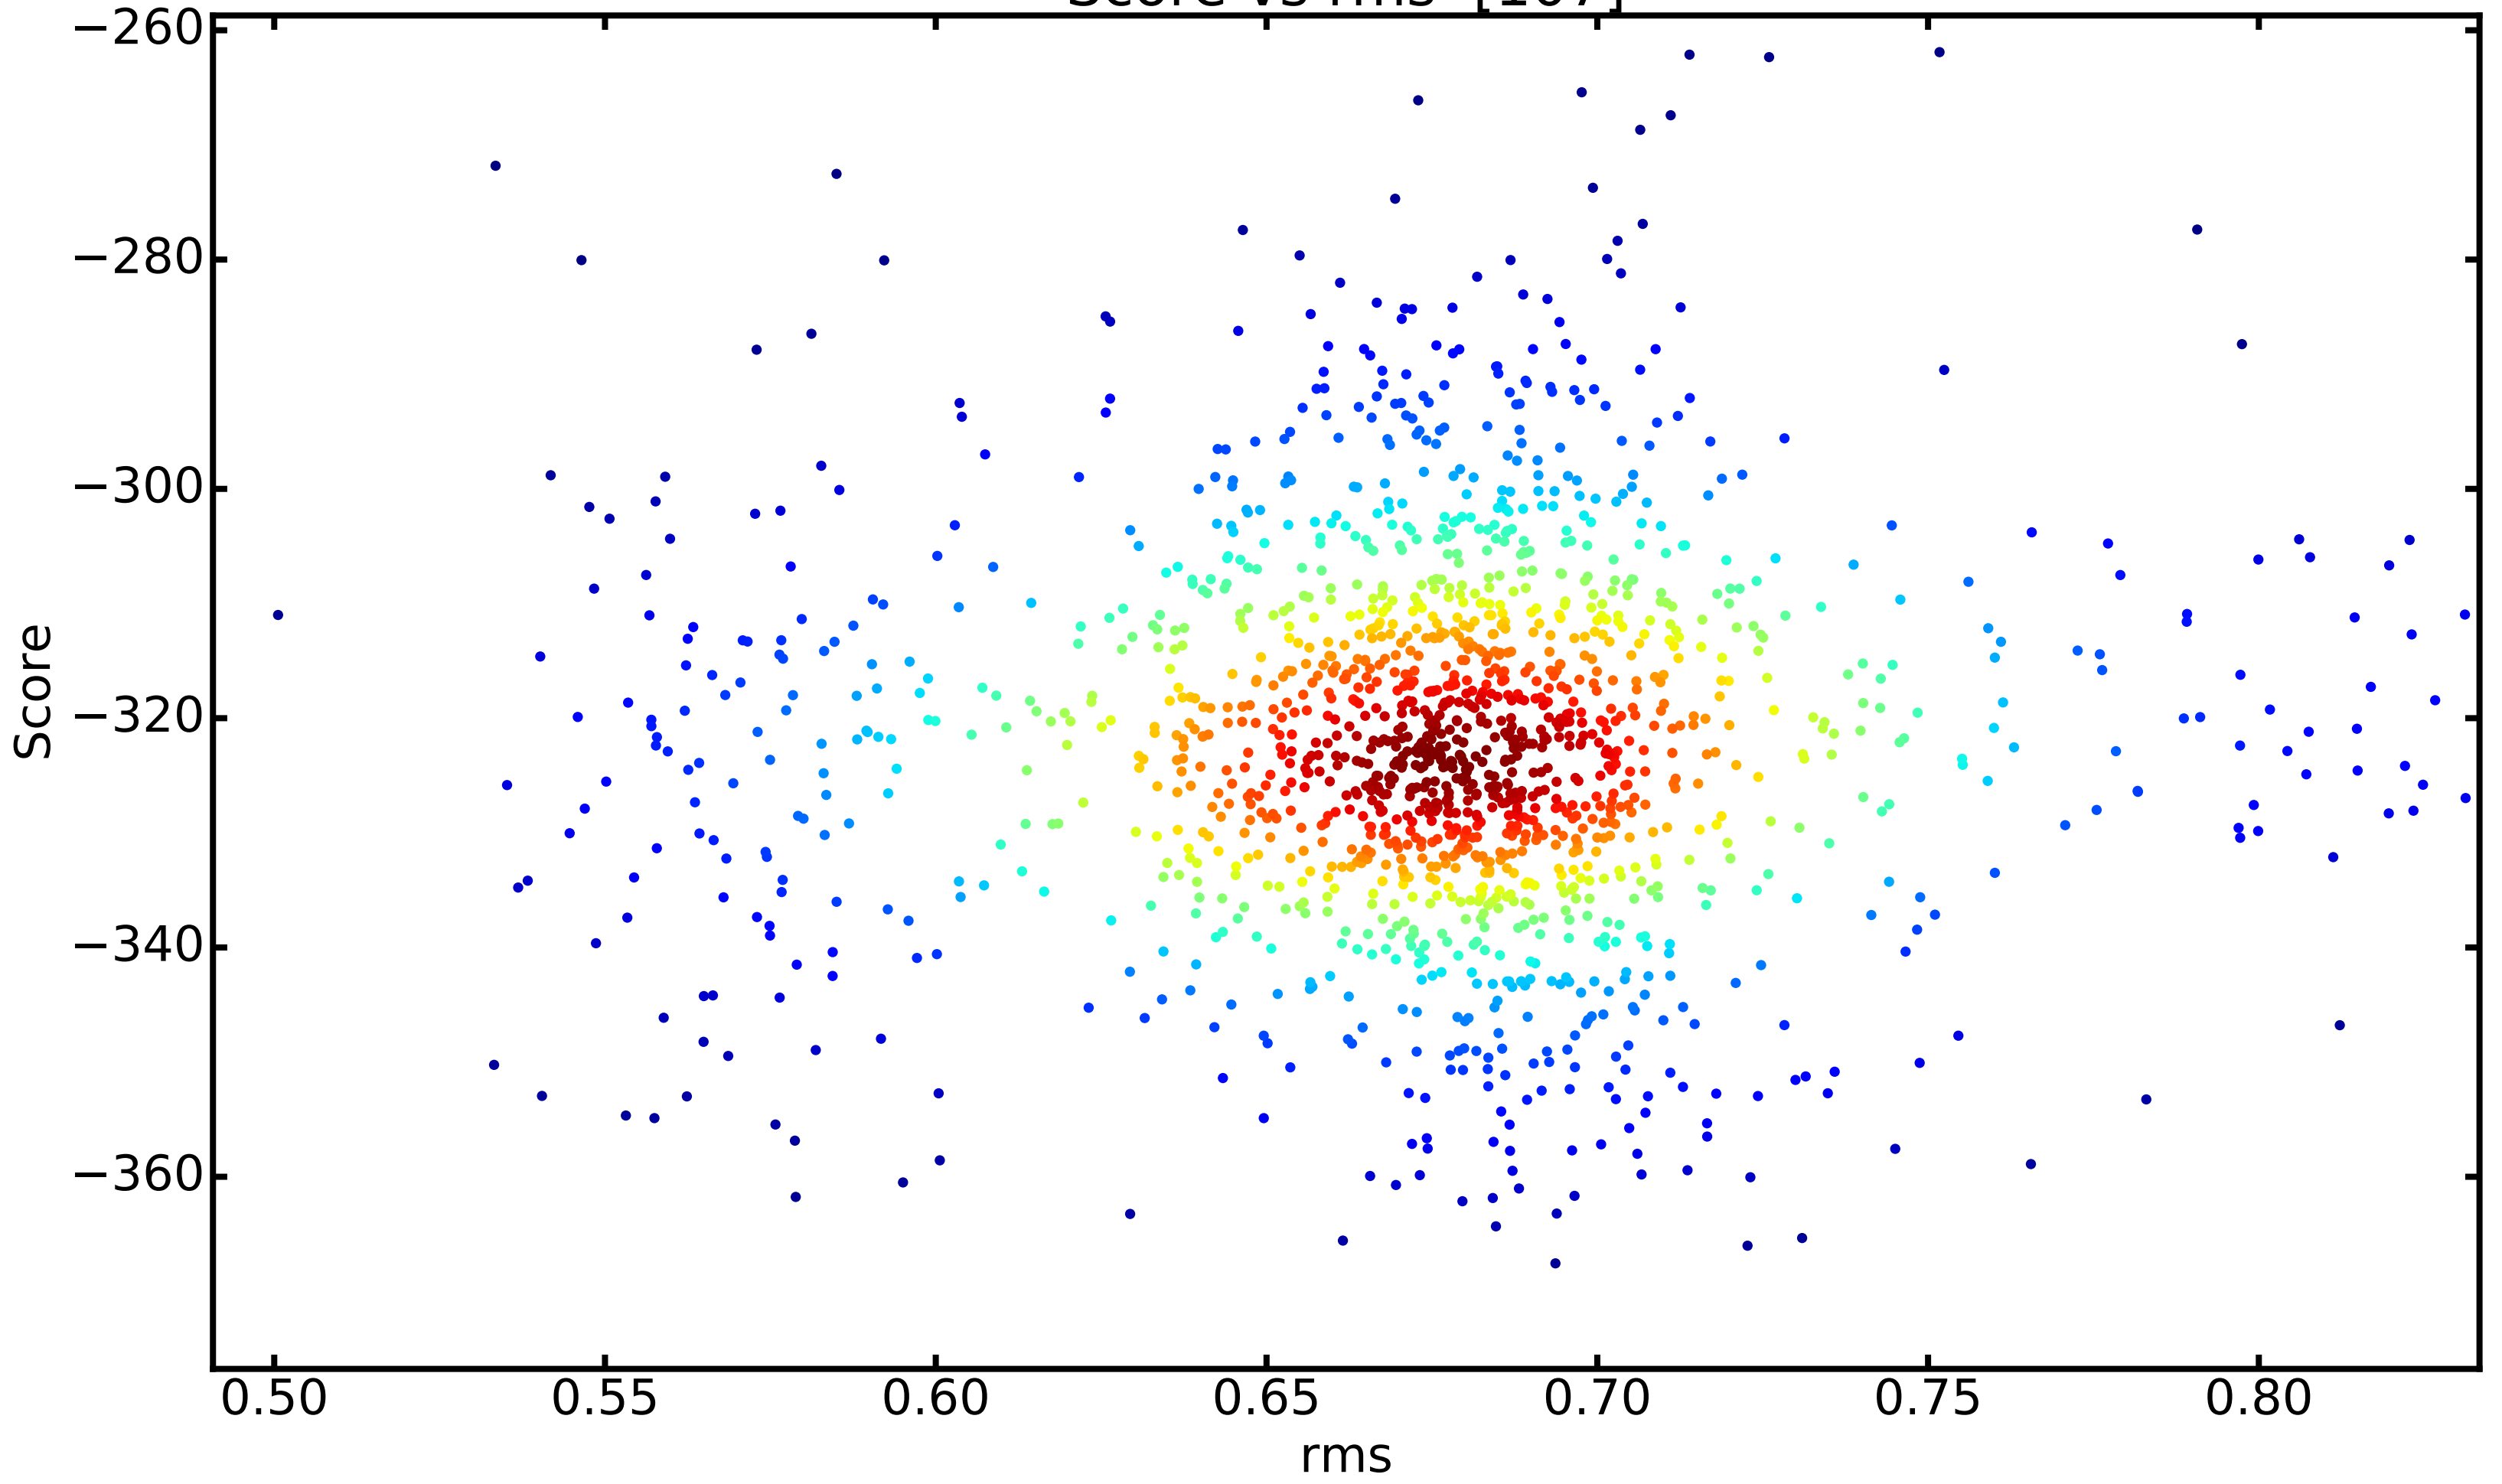

Score vs rms [108]

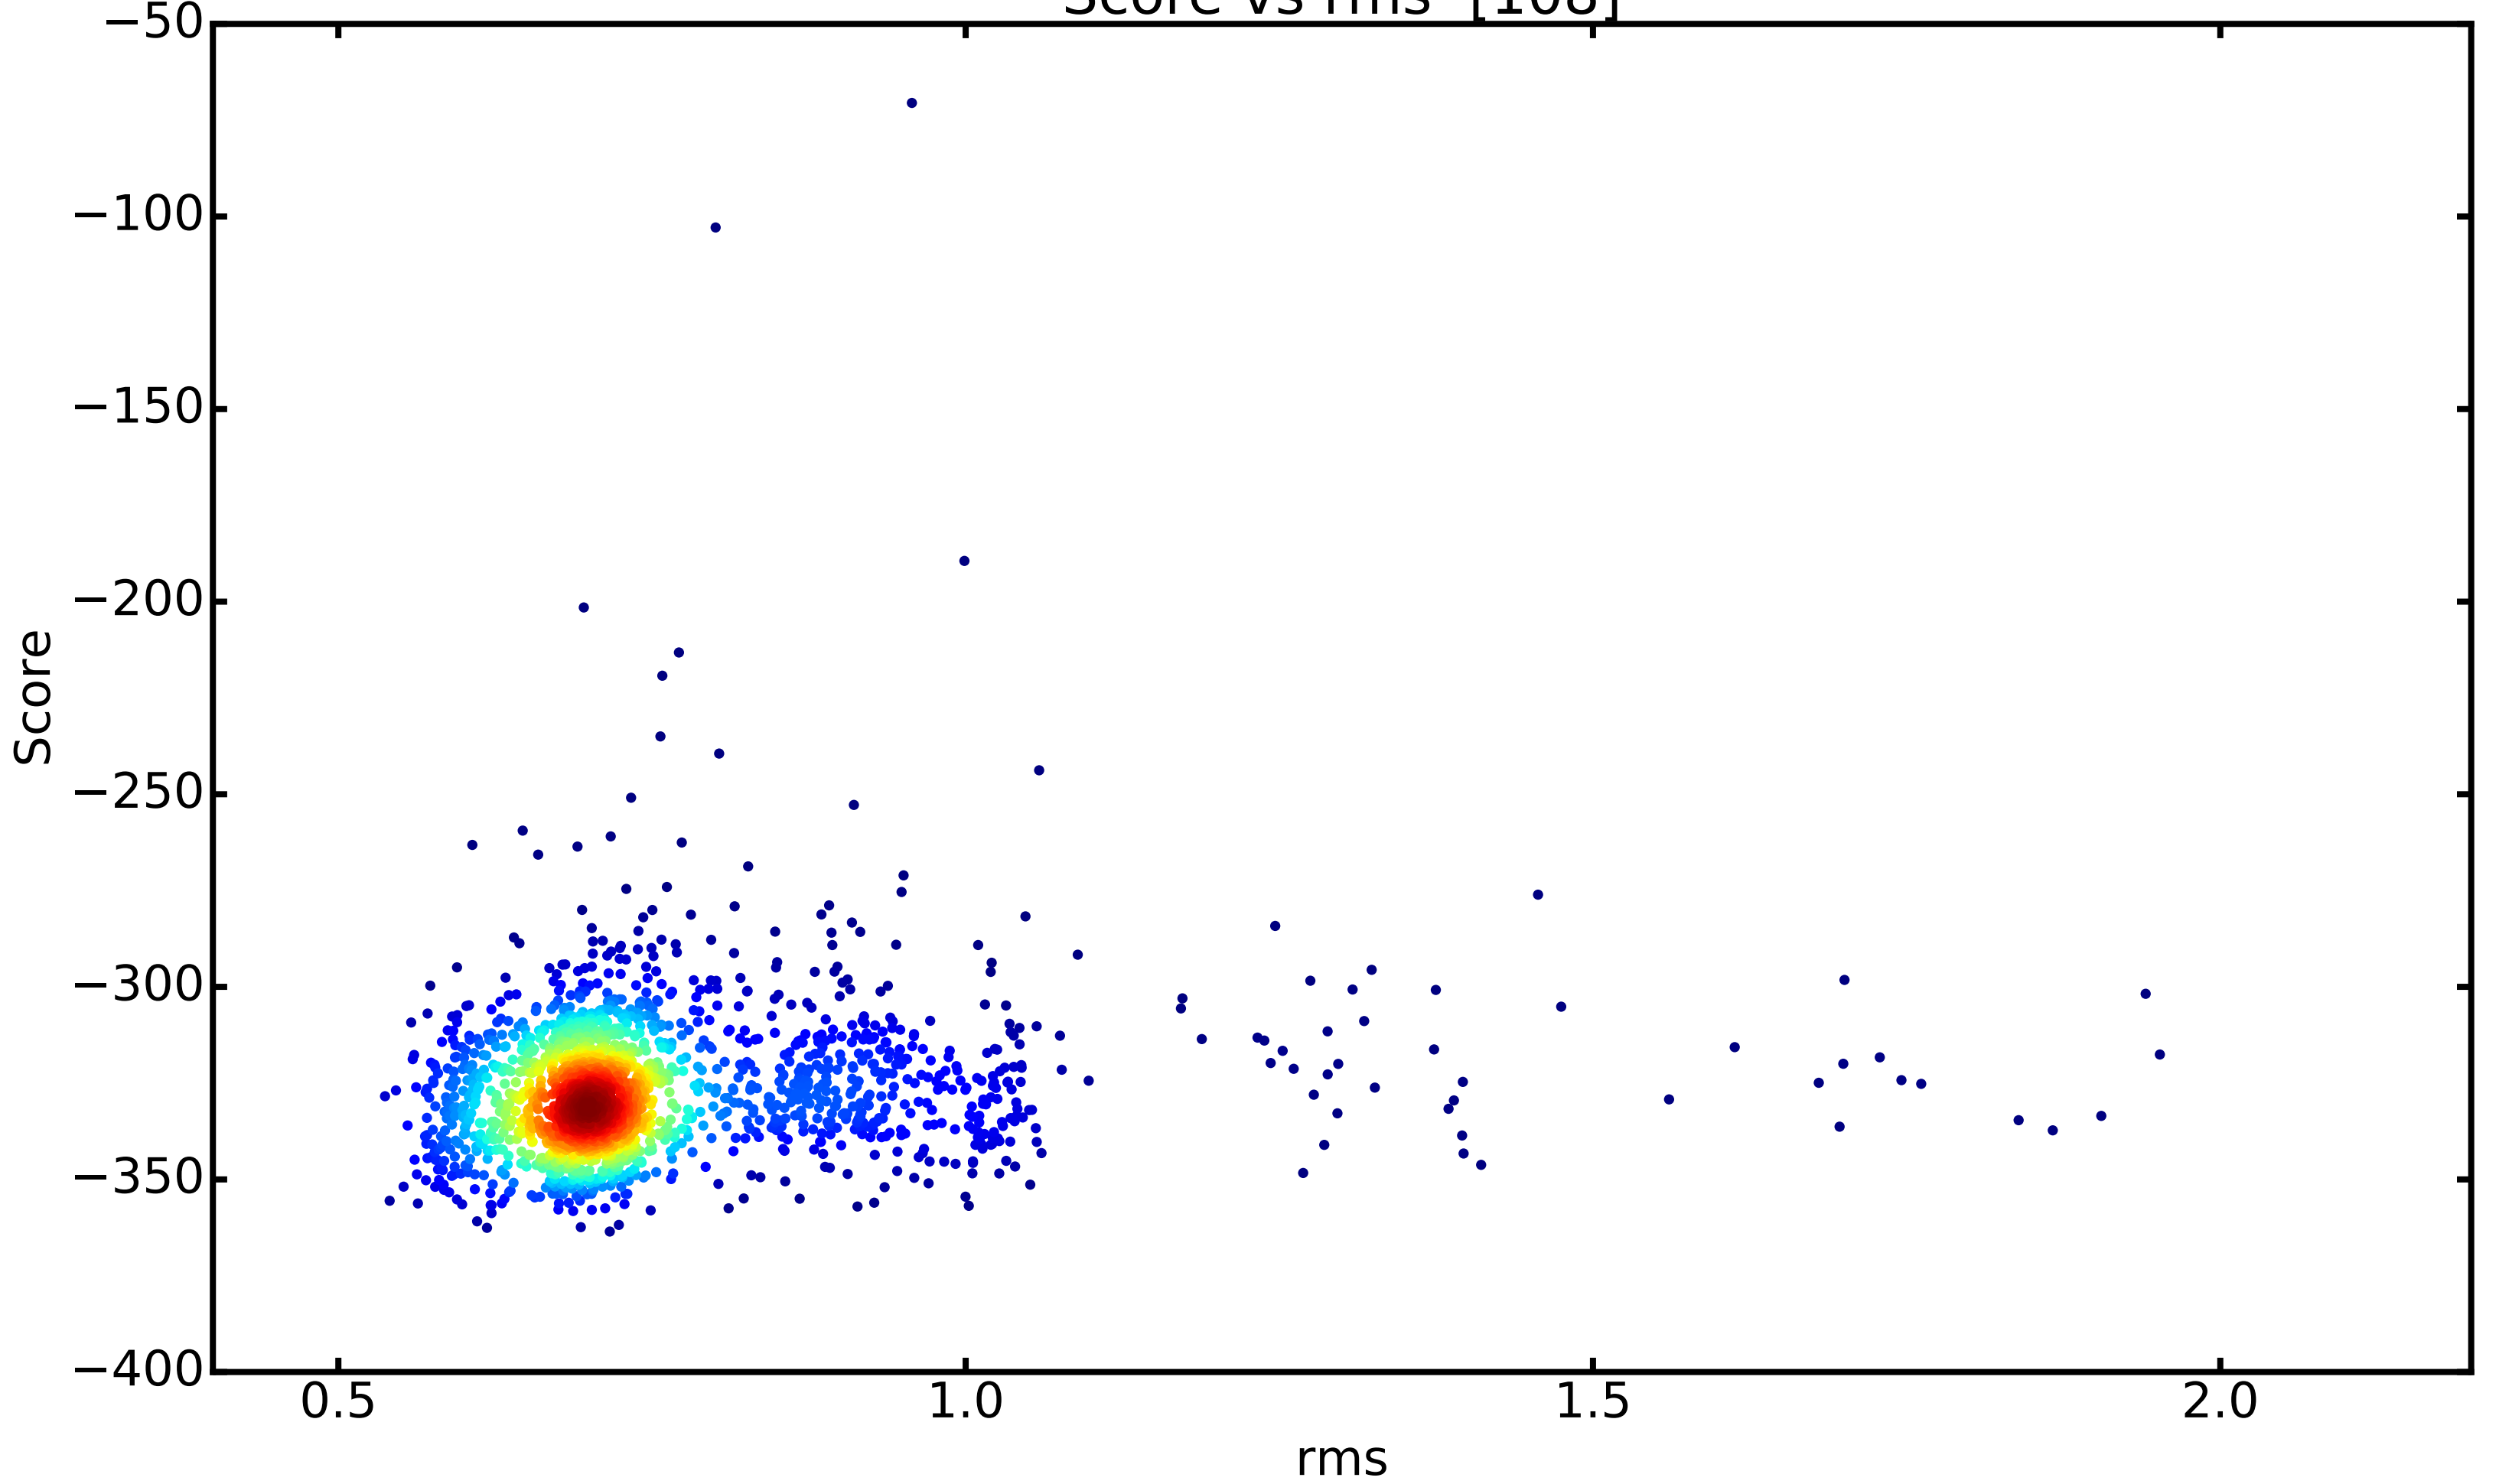

Score vs rms [108]

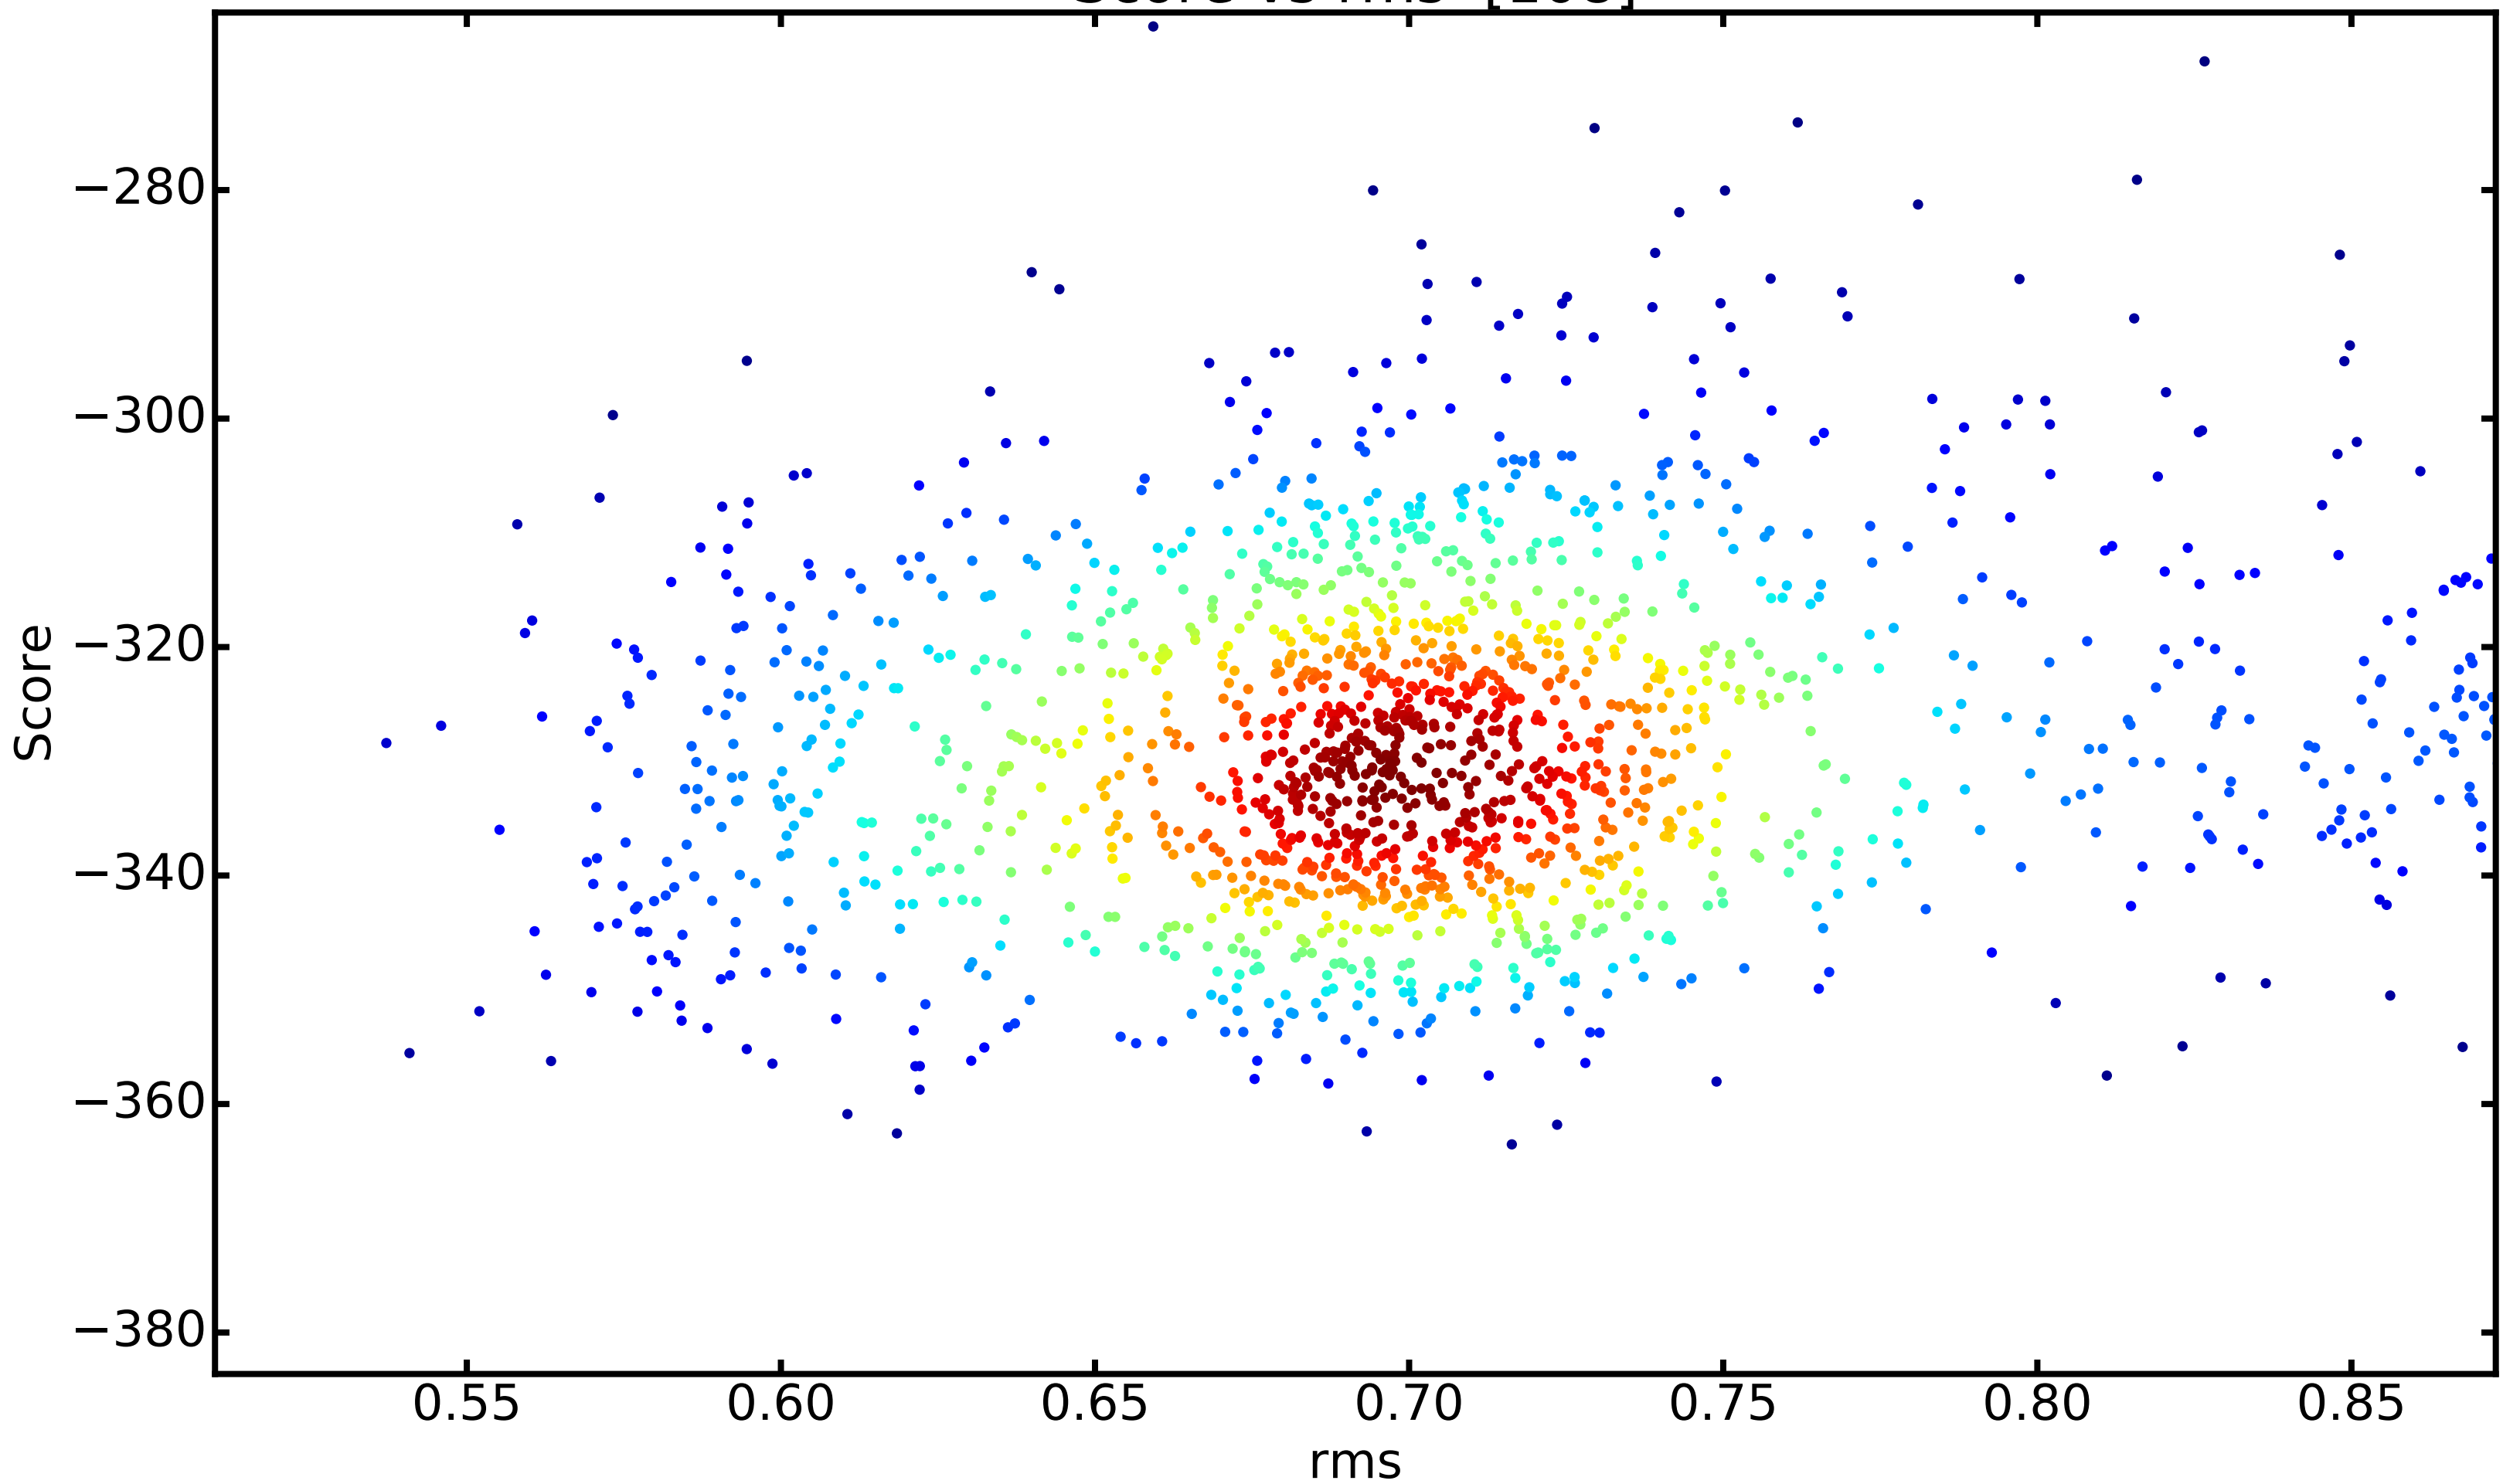

Score vs rms [130]

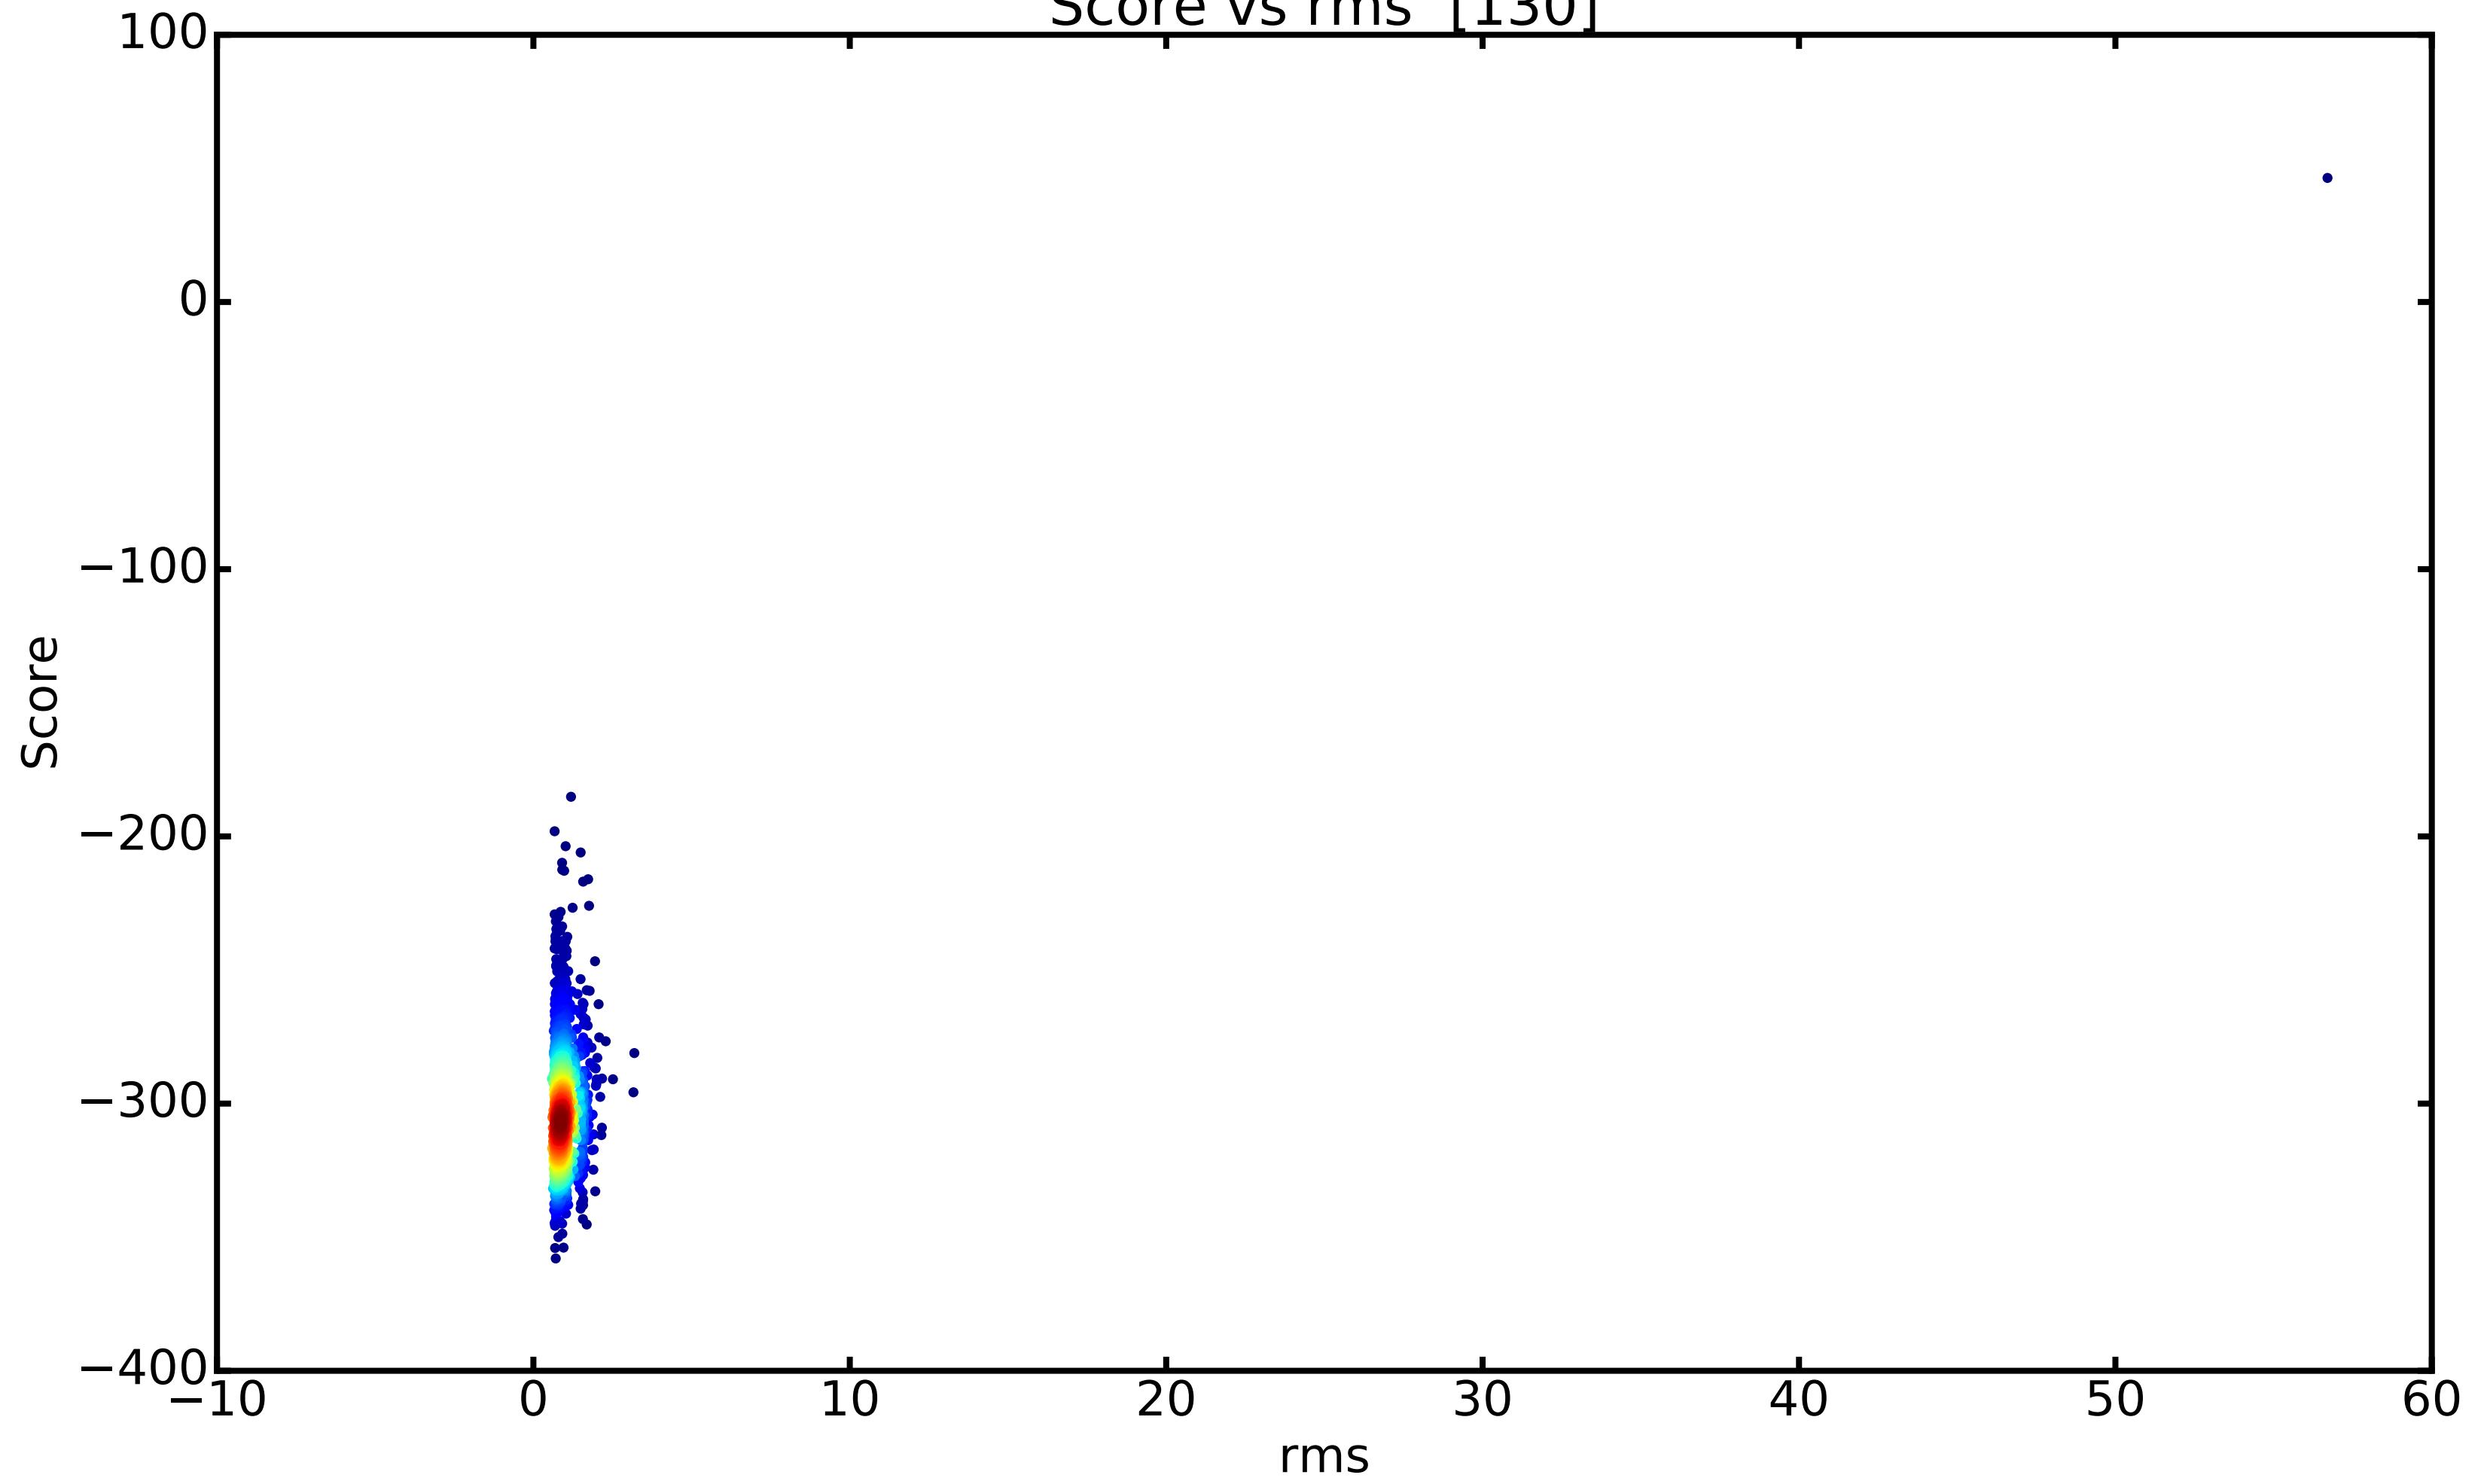

Score vs rms [130]

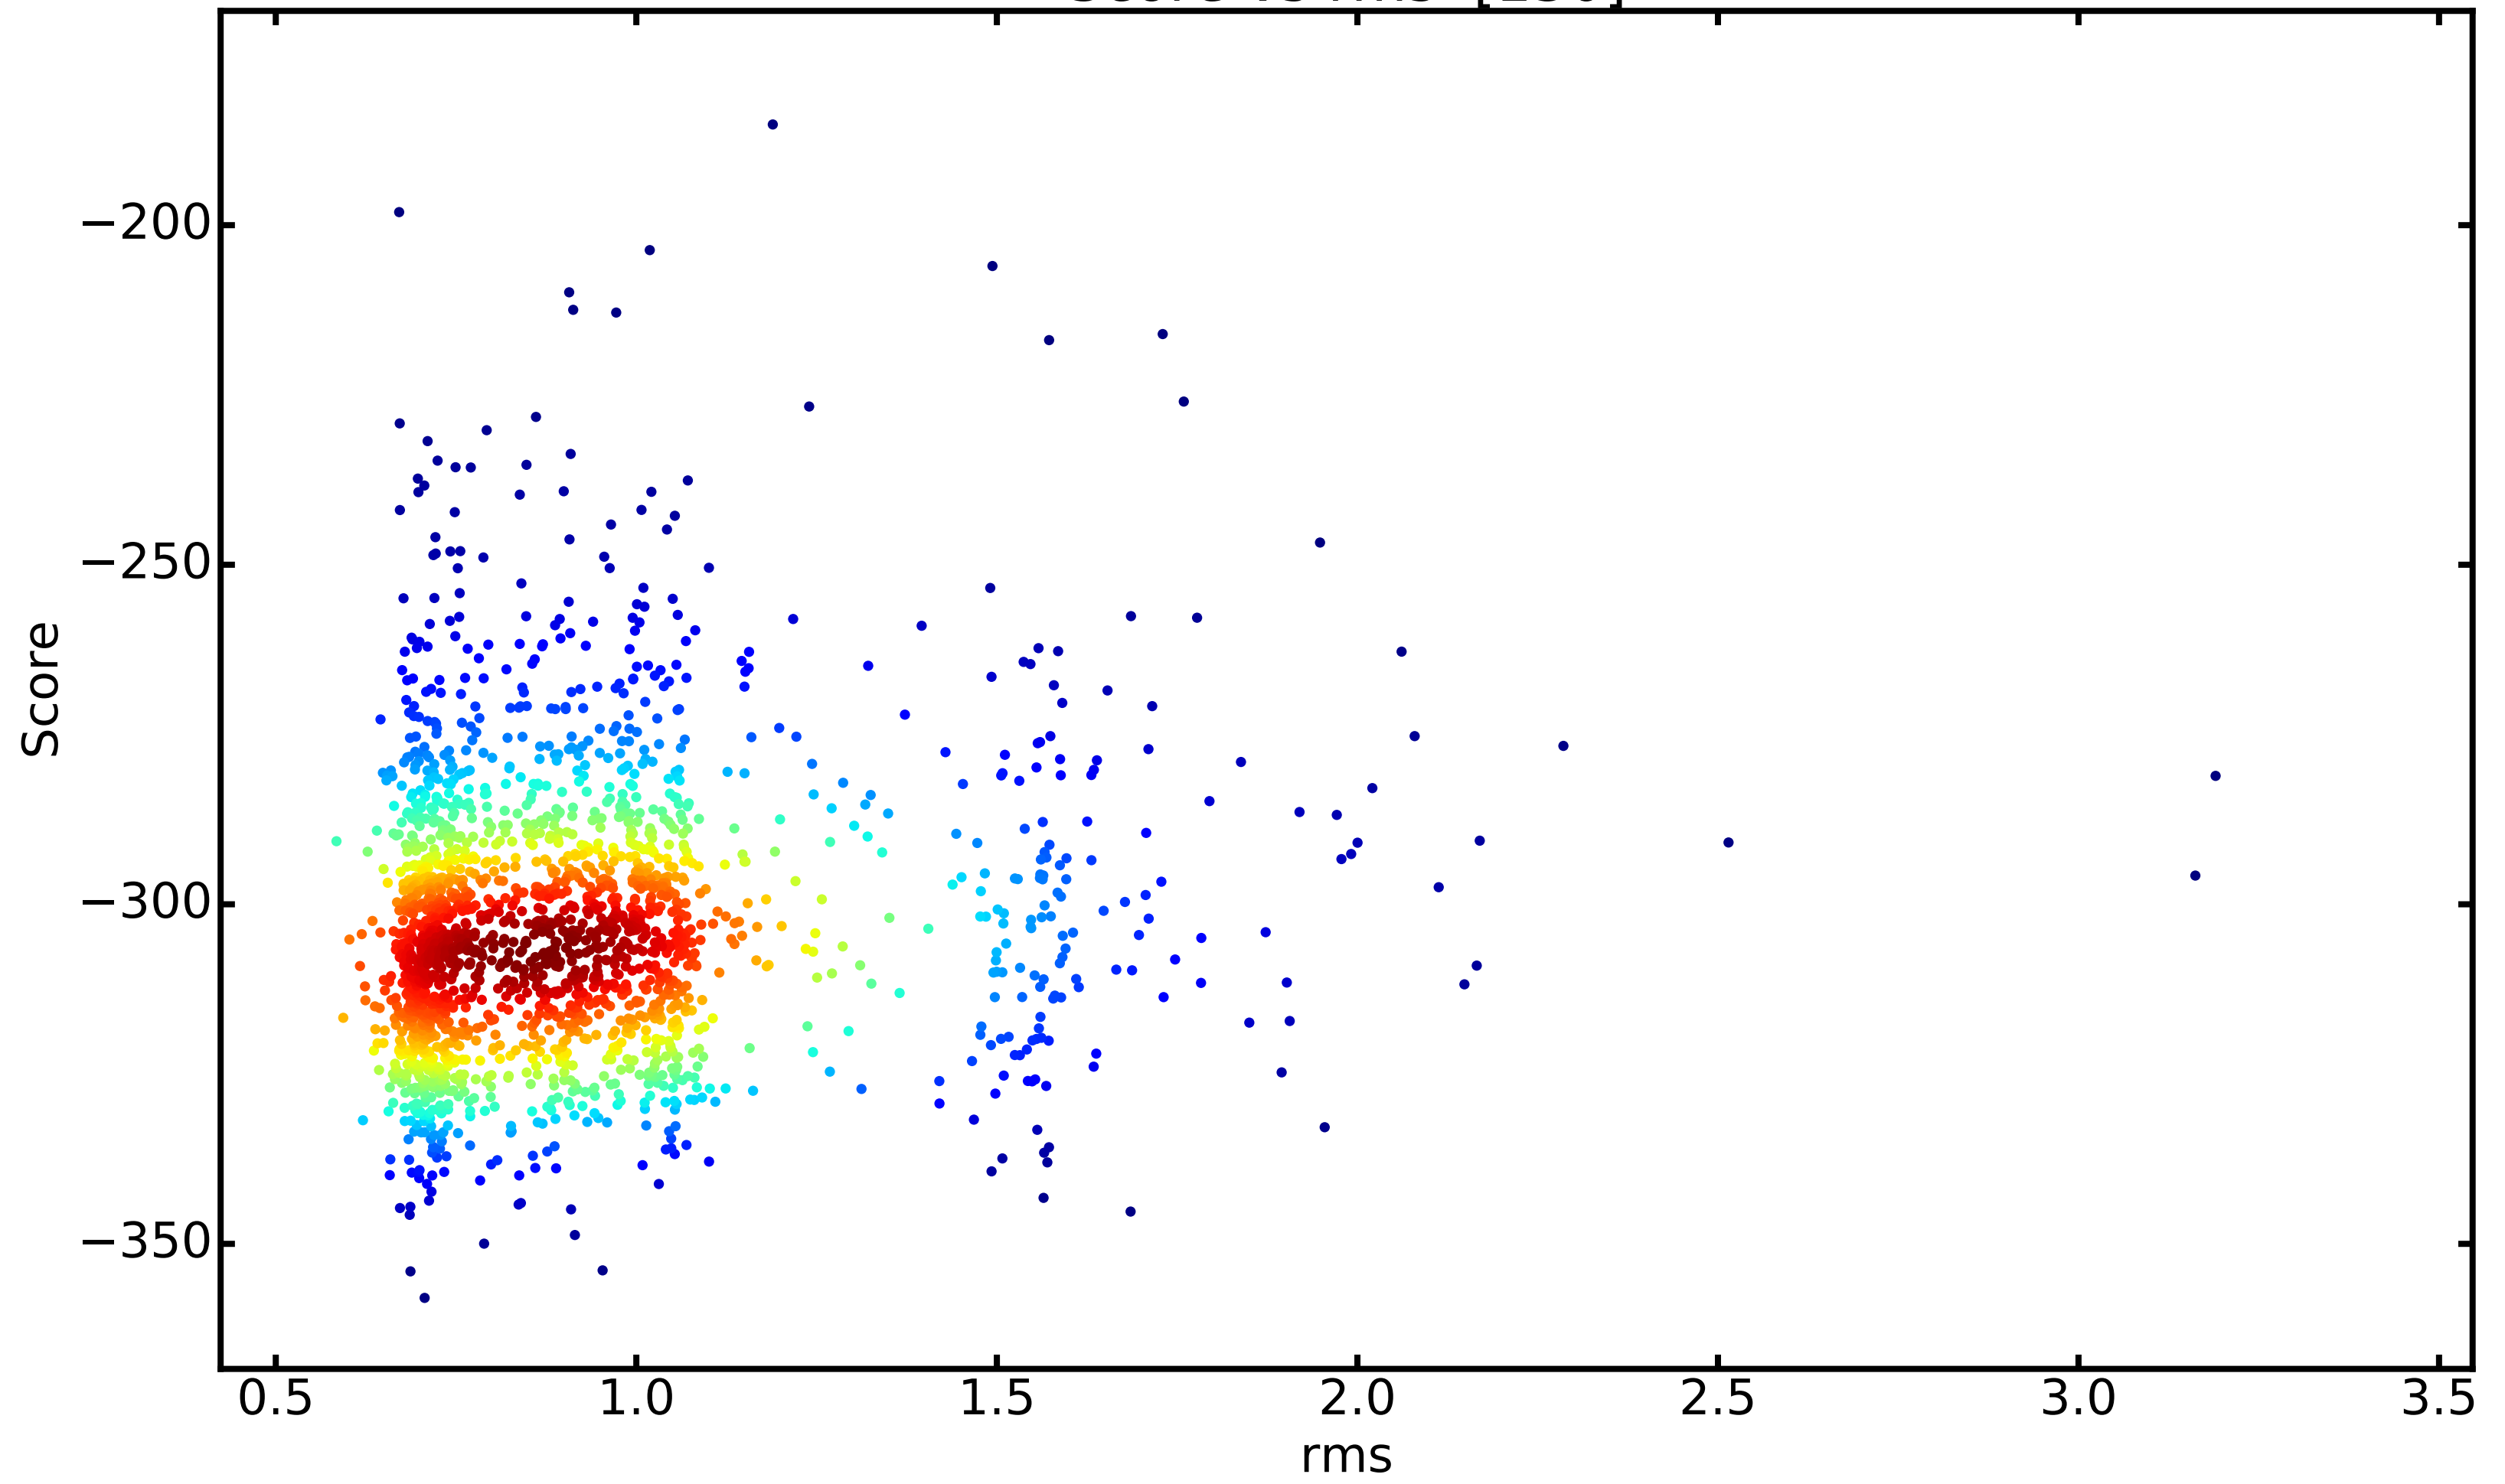

Score vs rms [131]

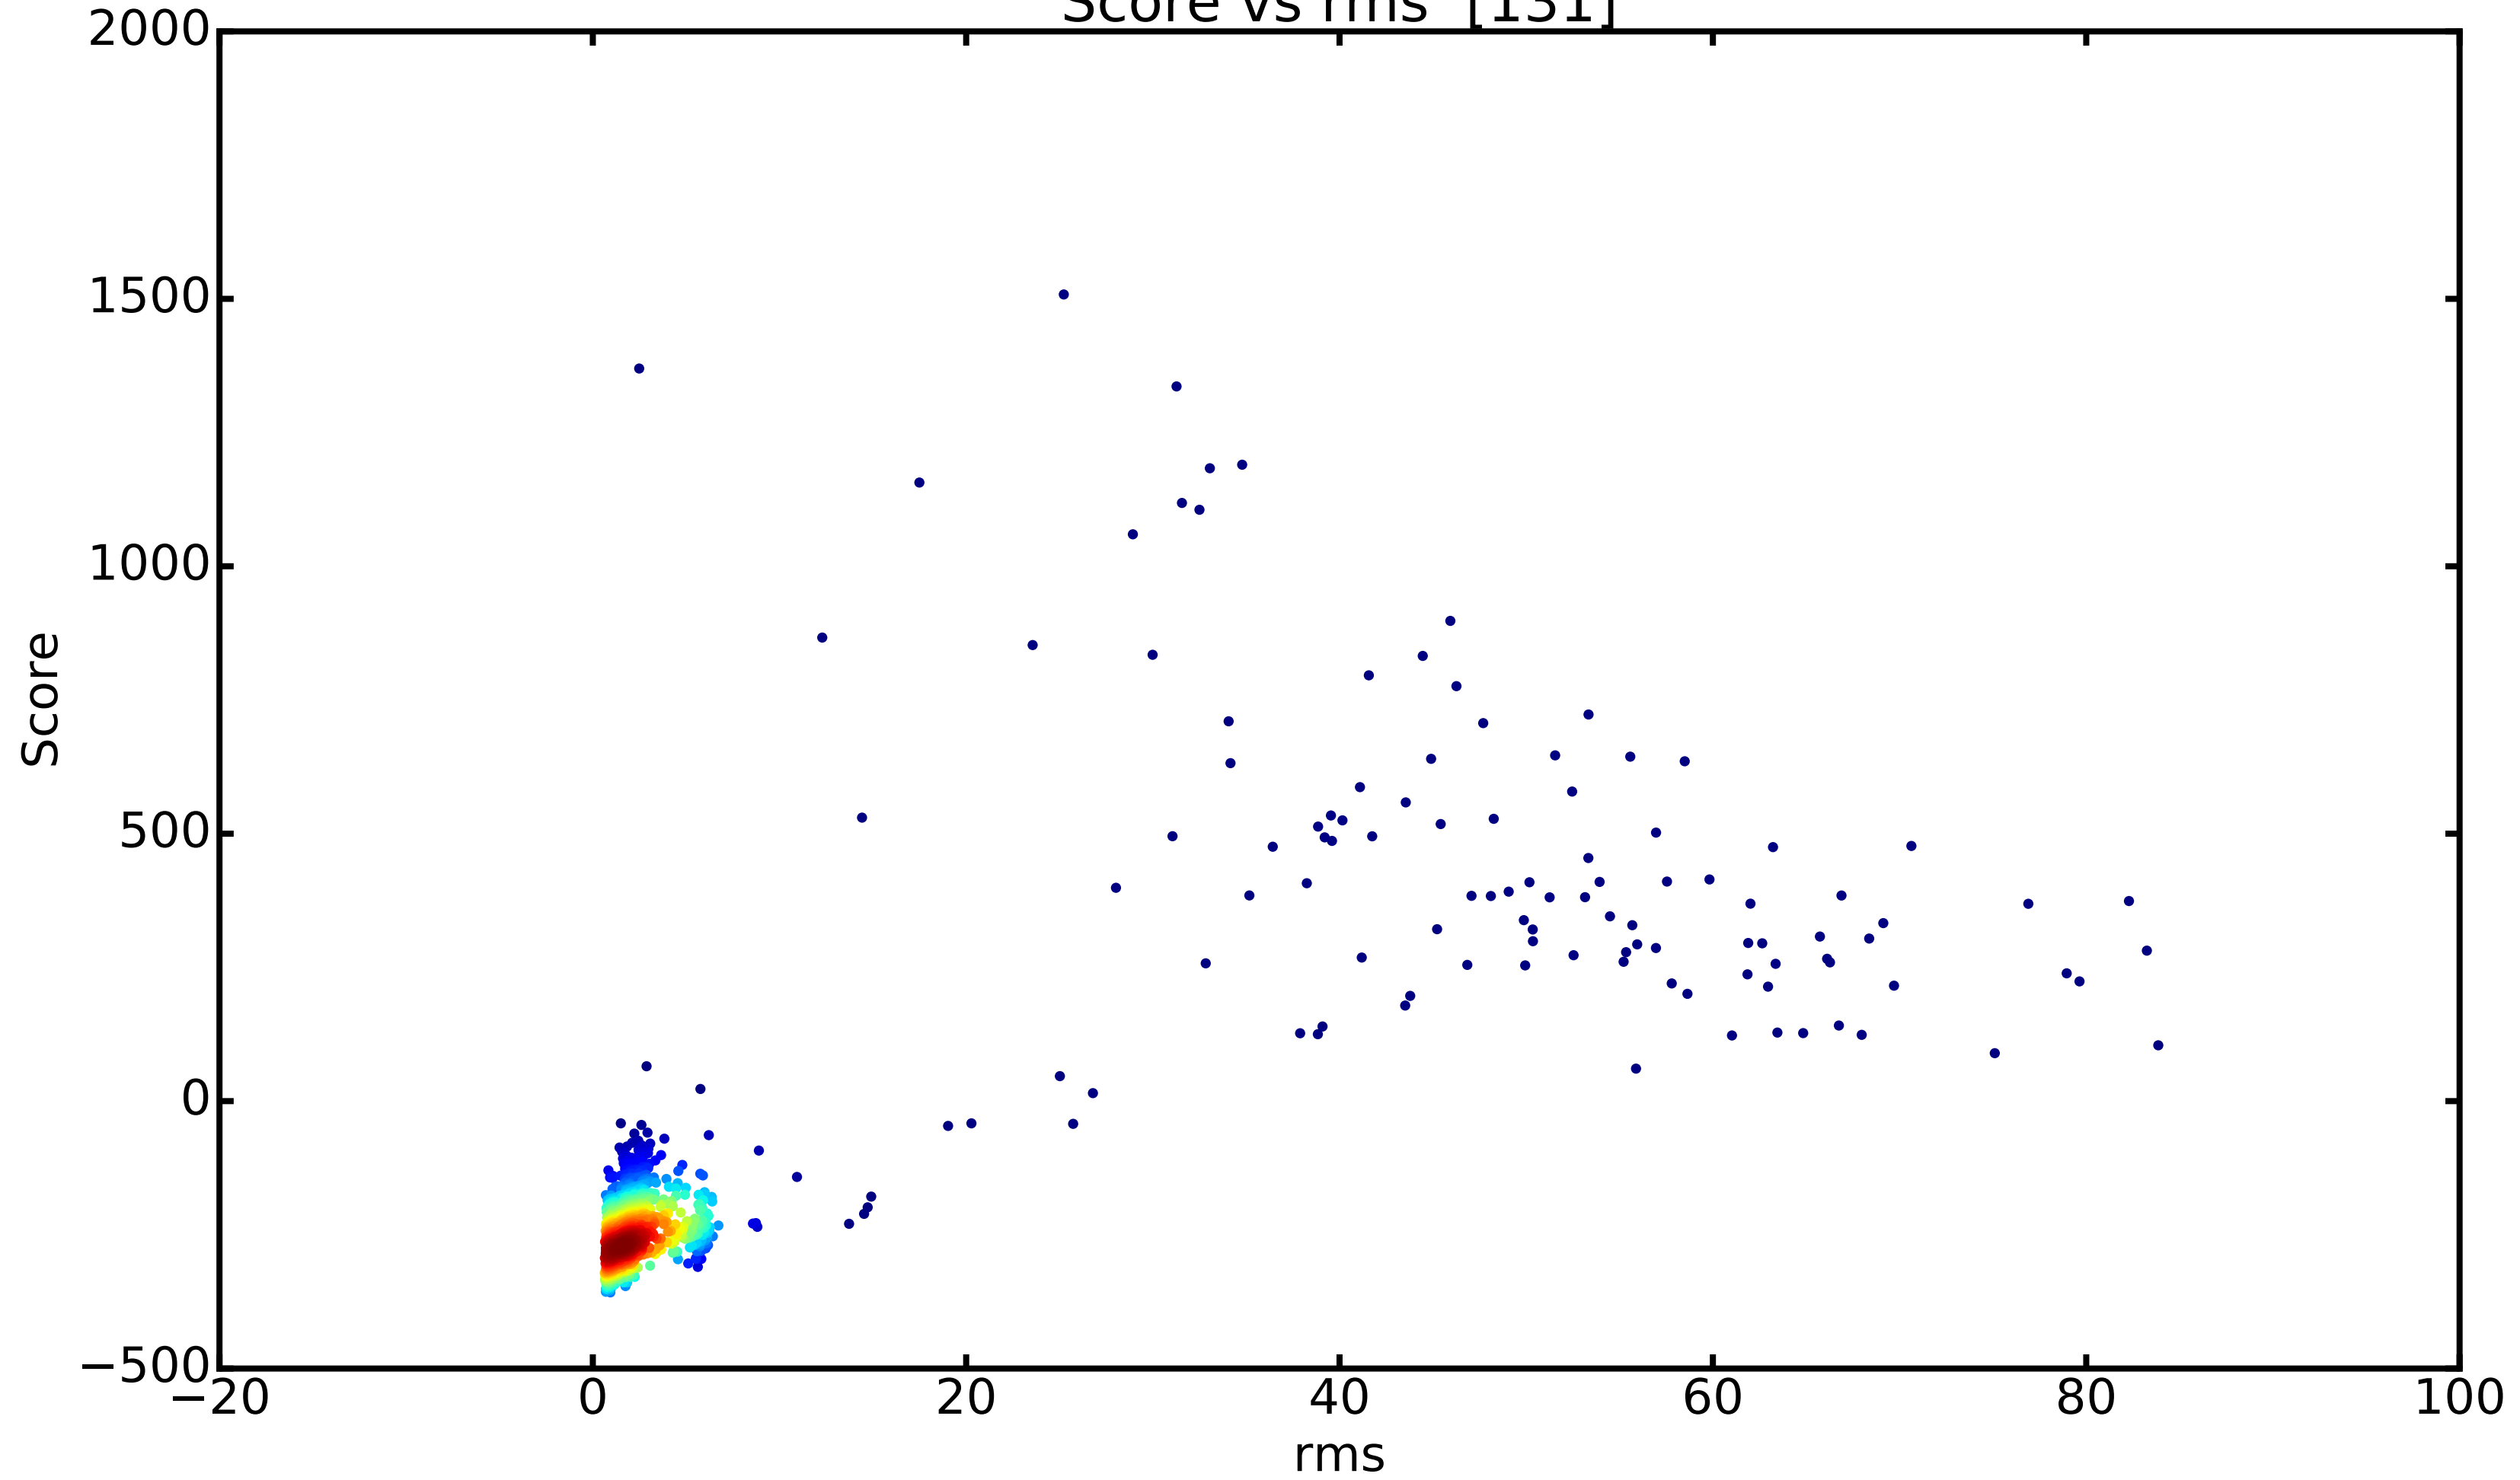

Score vs rms [131]

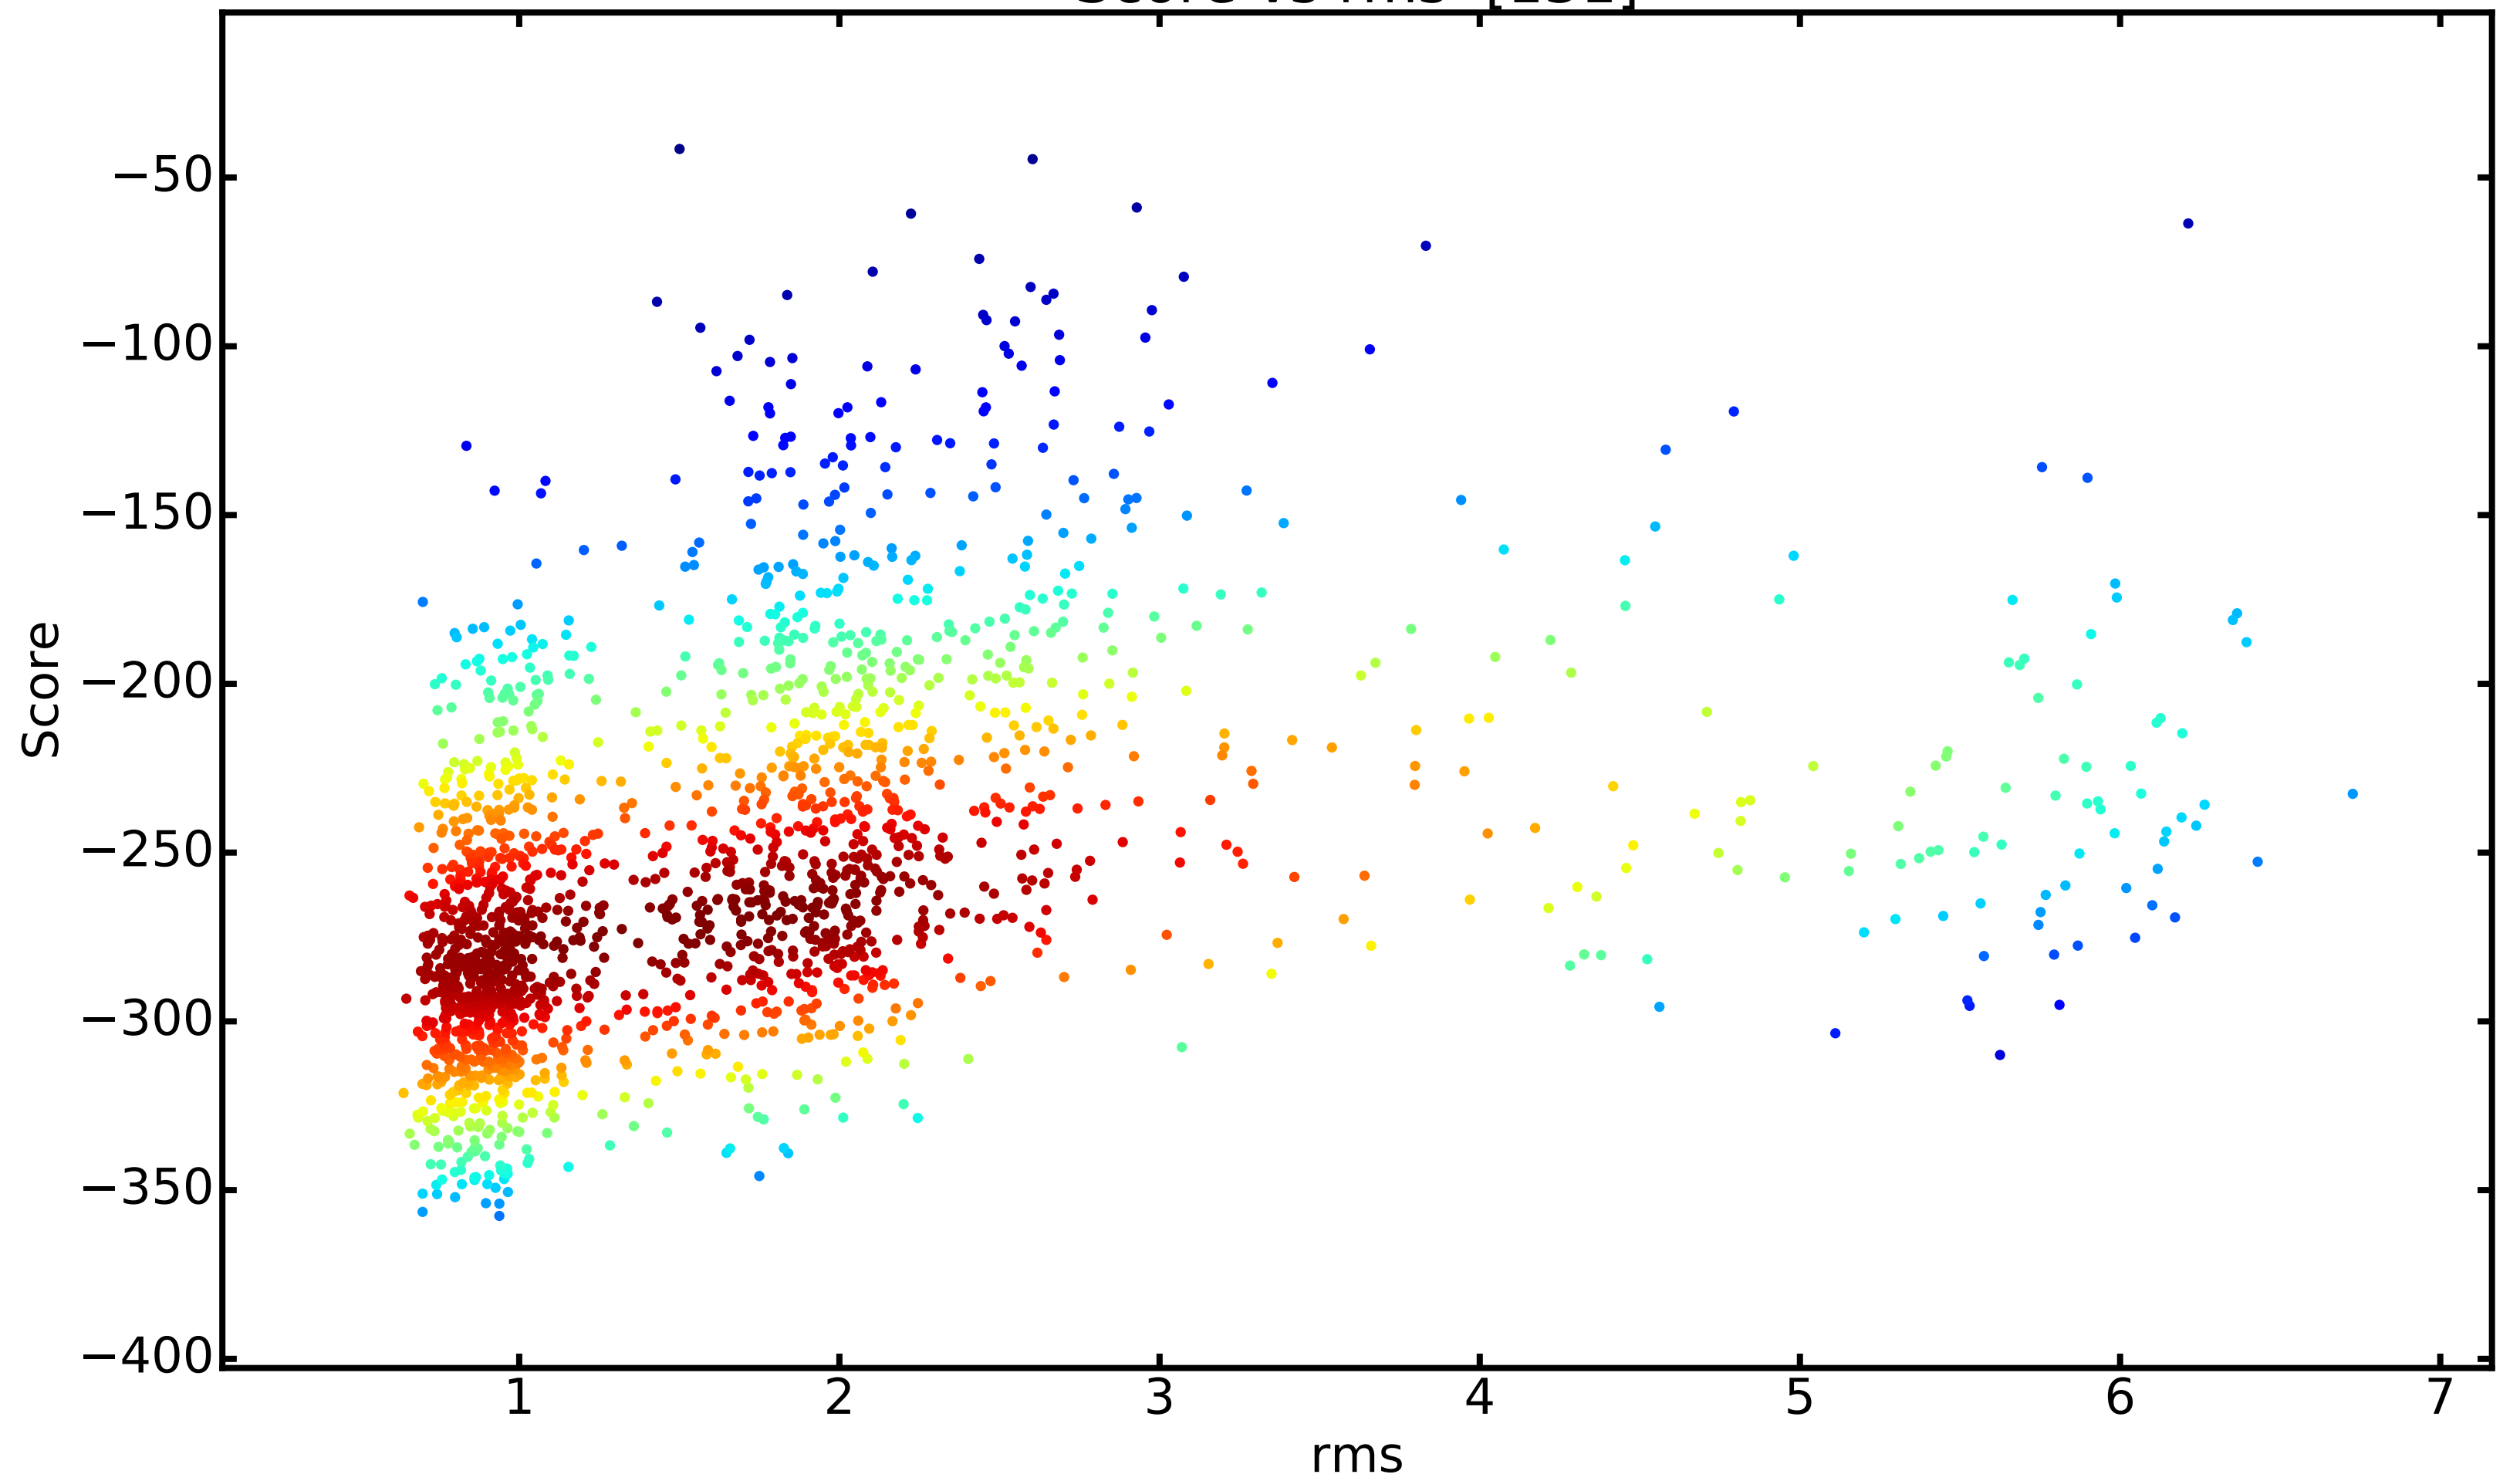



Score vs rms [141]

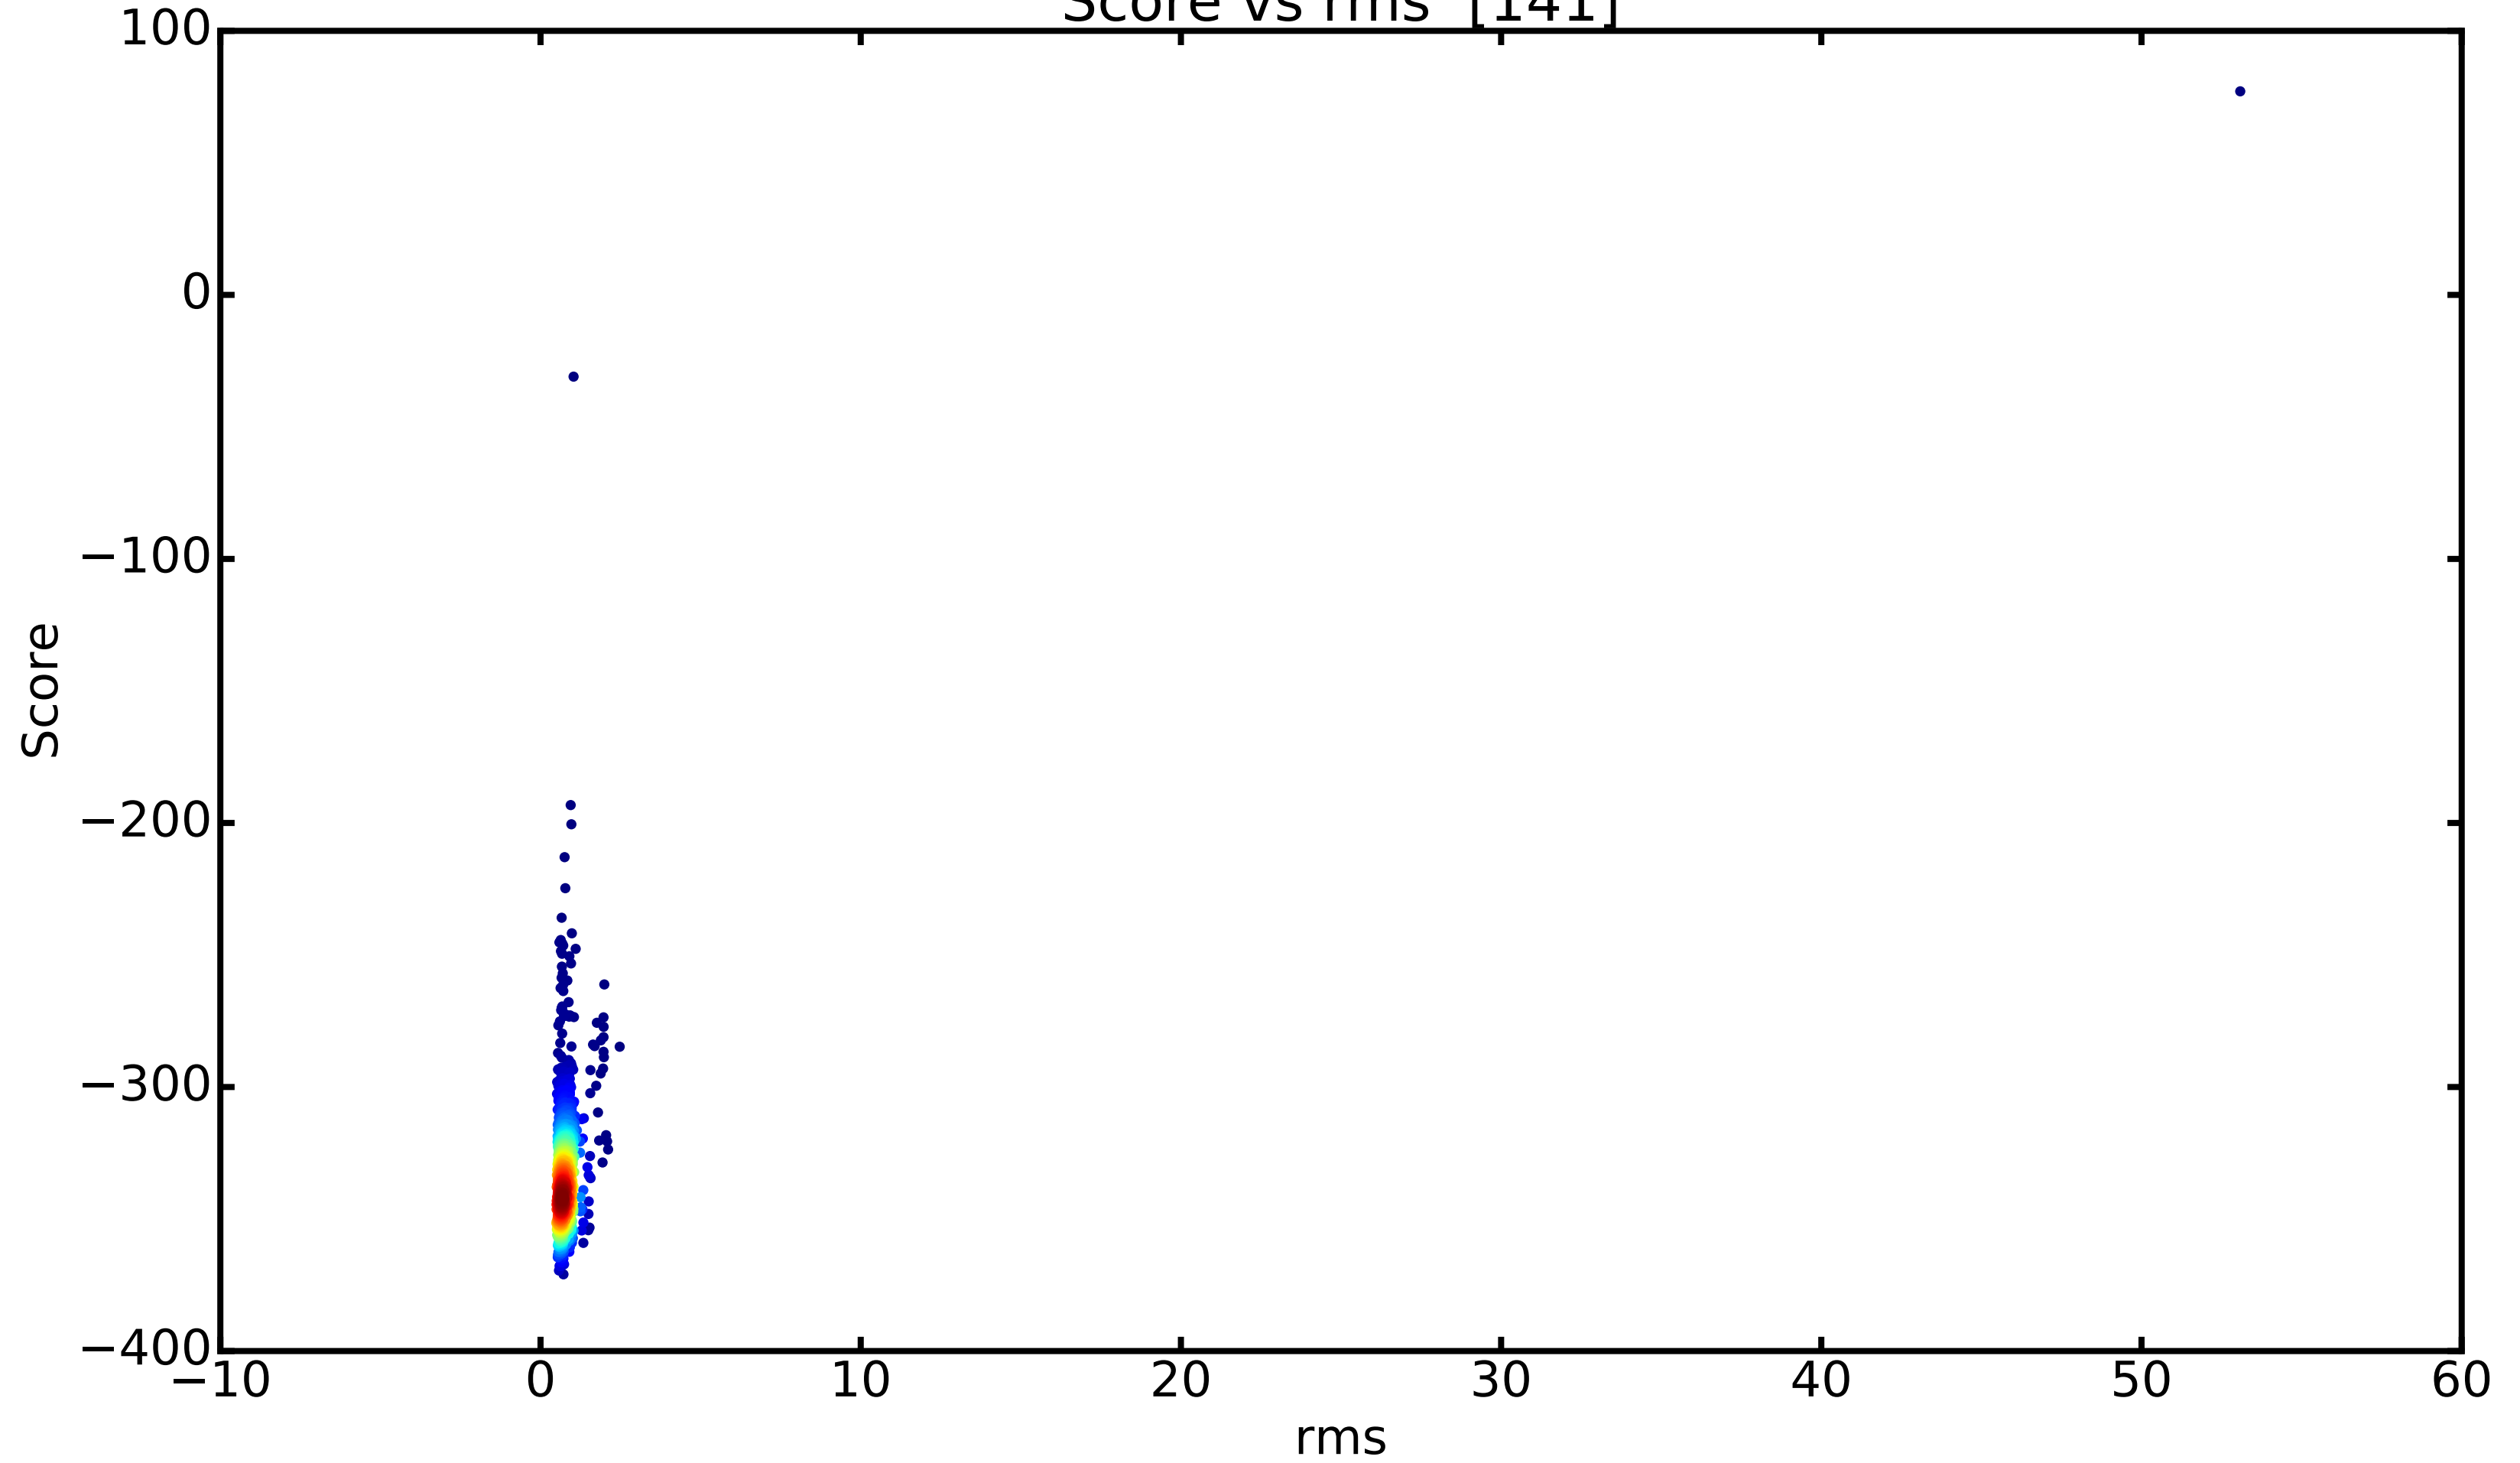

Score vs rms [141]

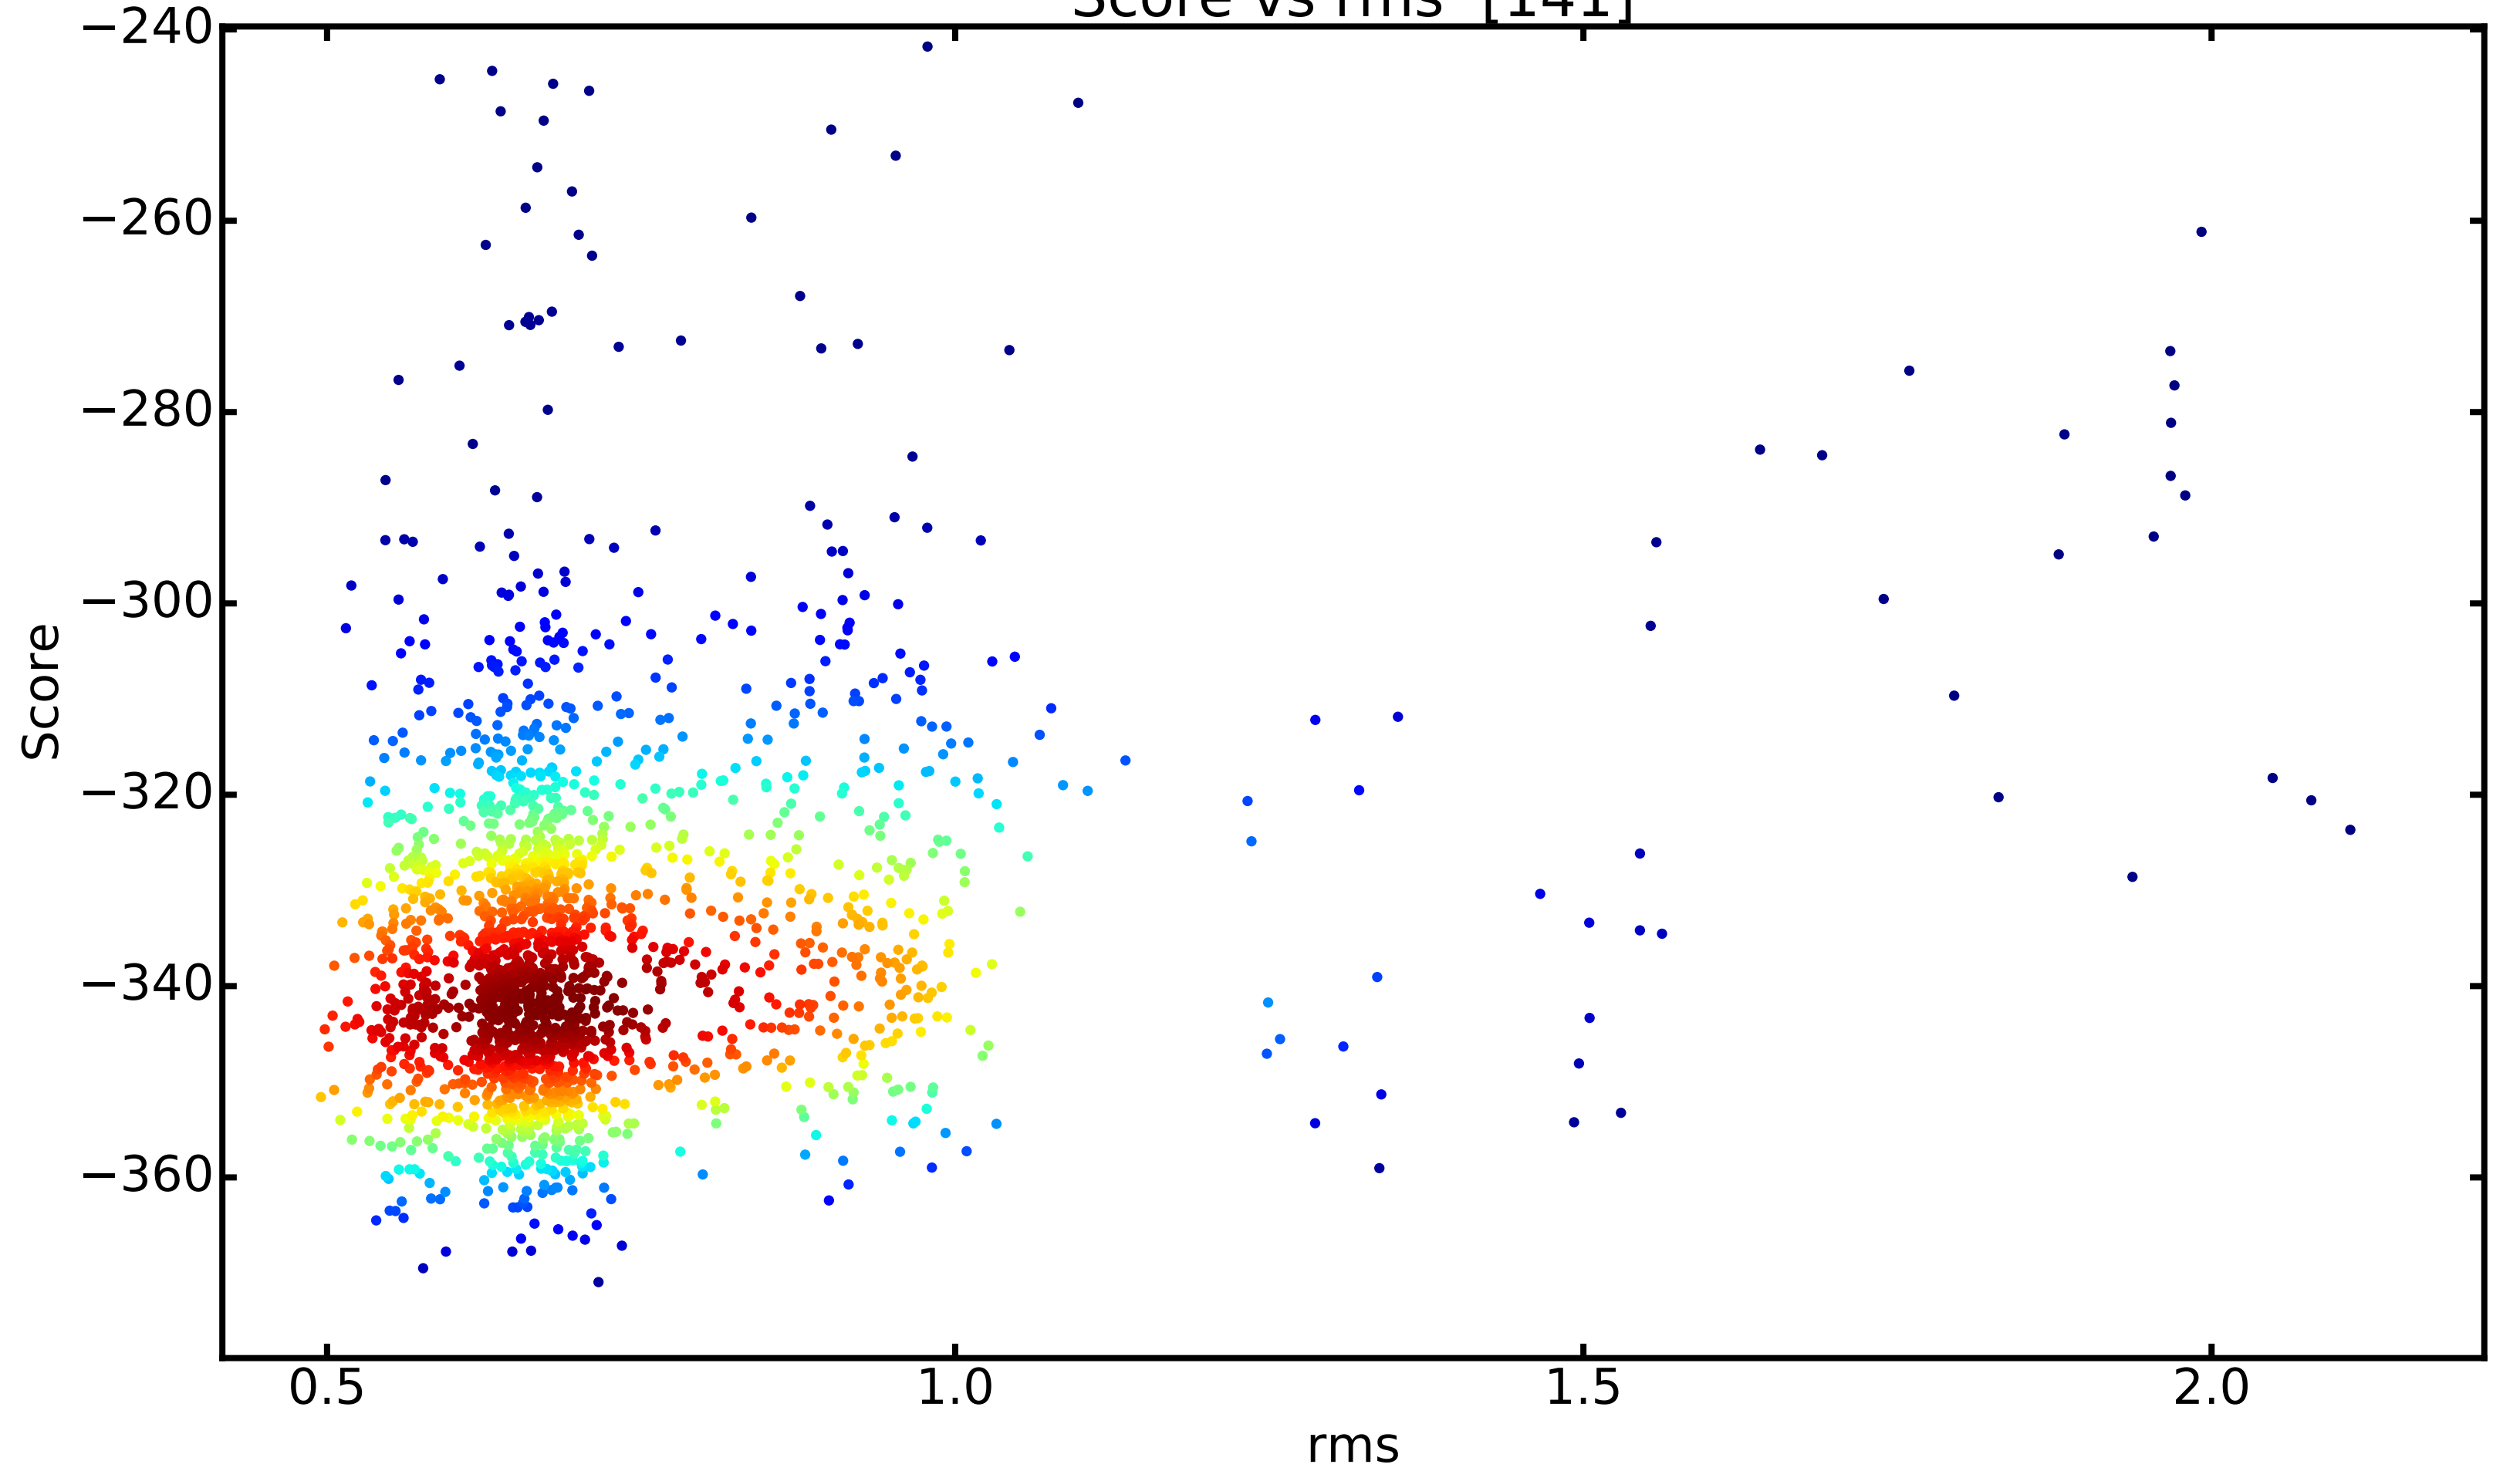

Score vs rms [144]

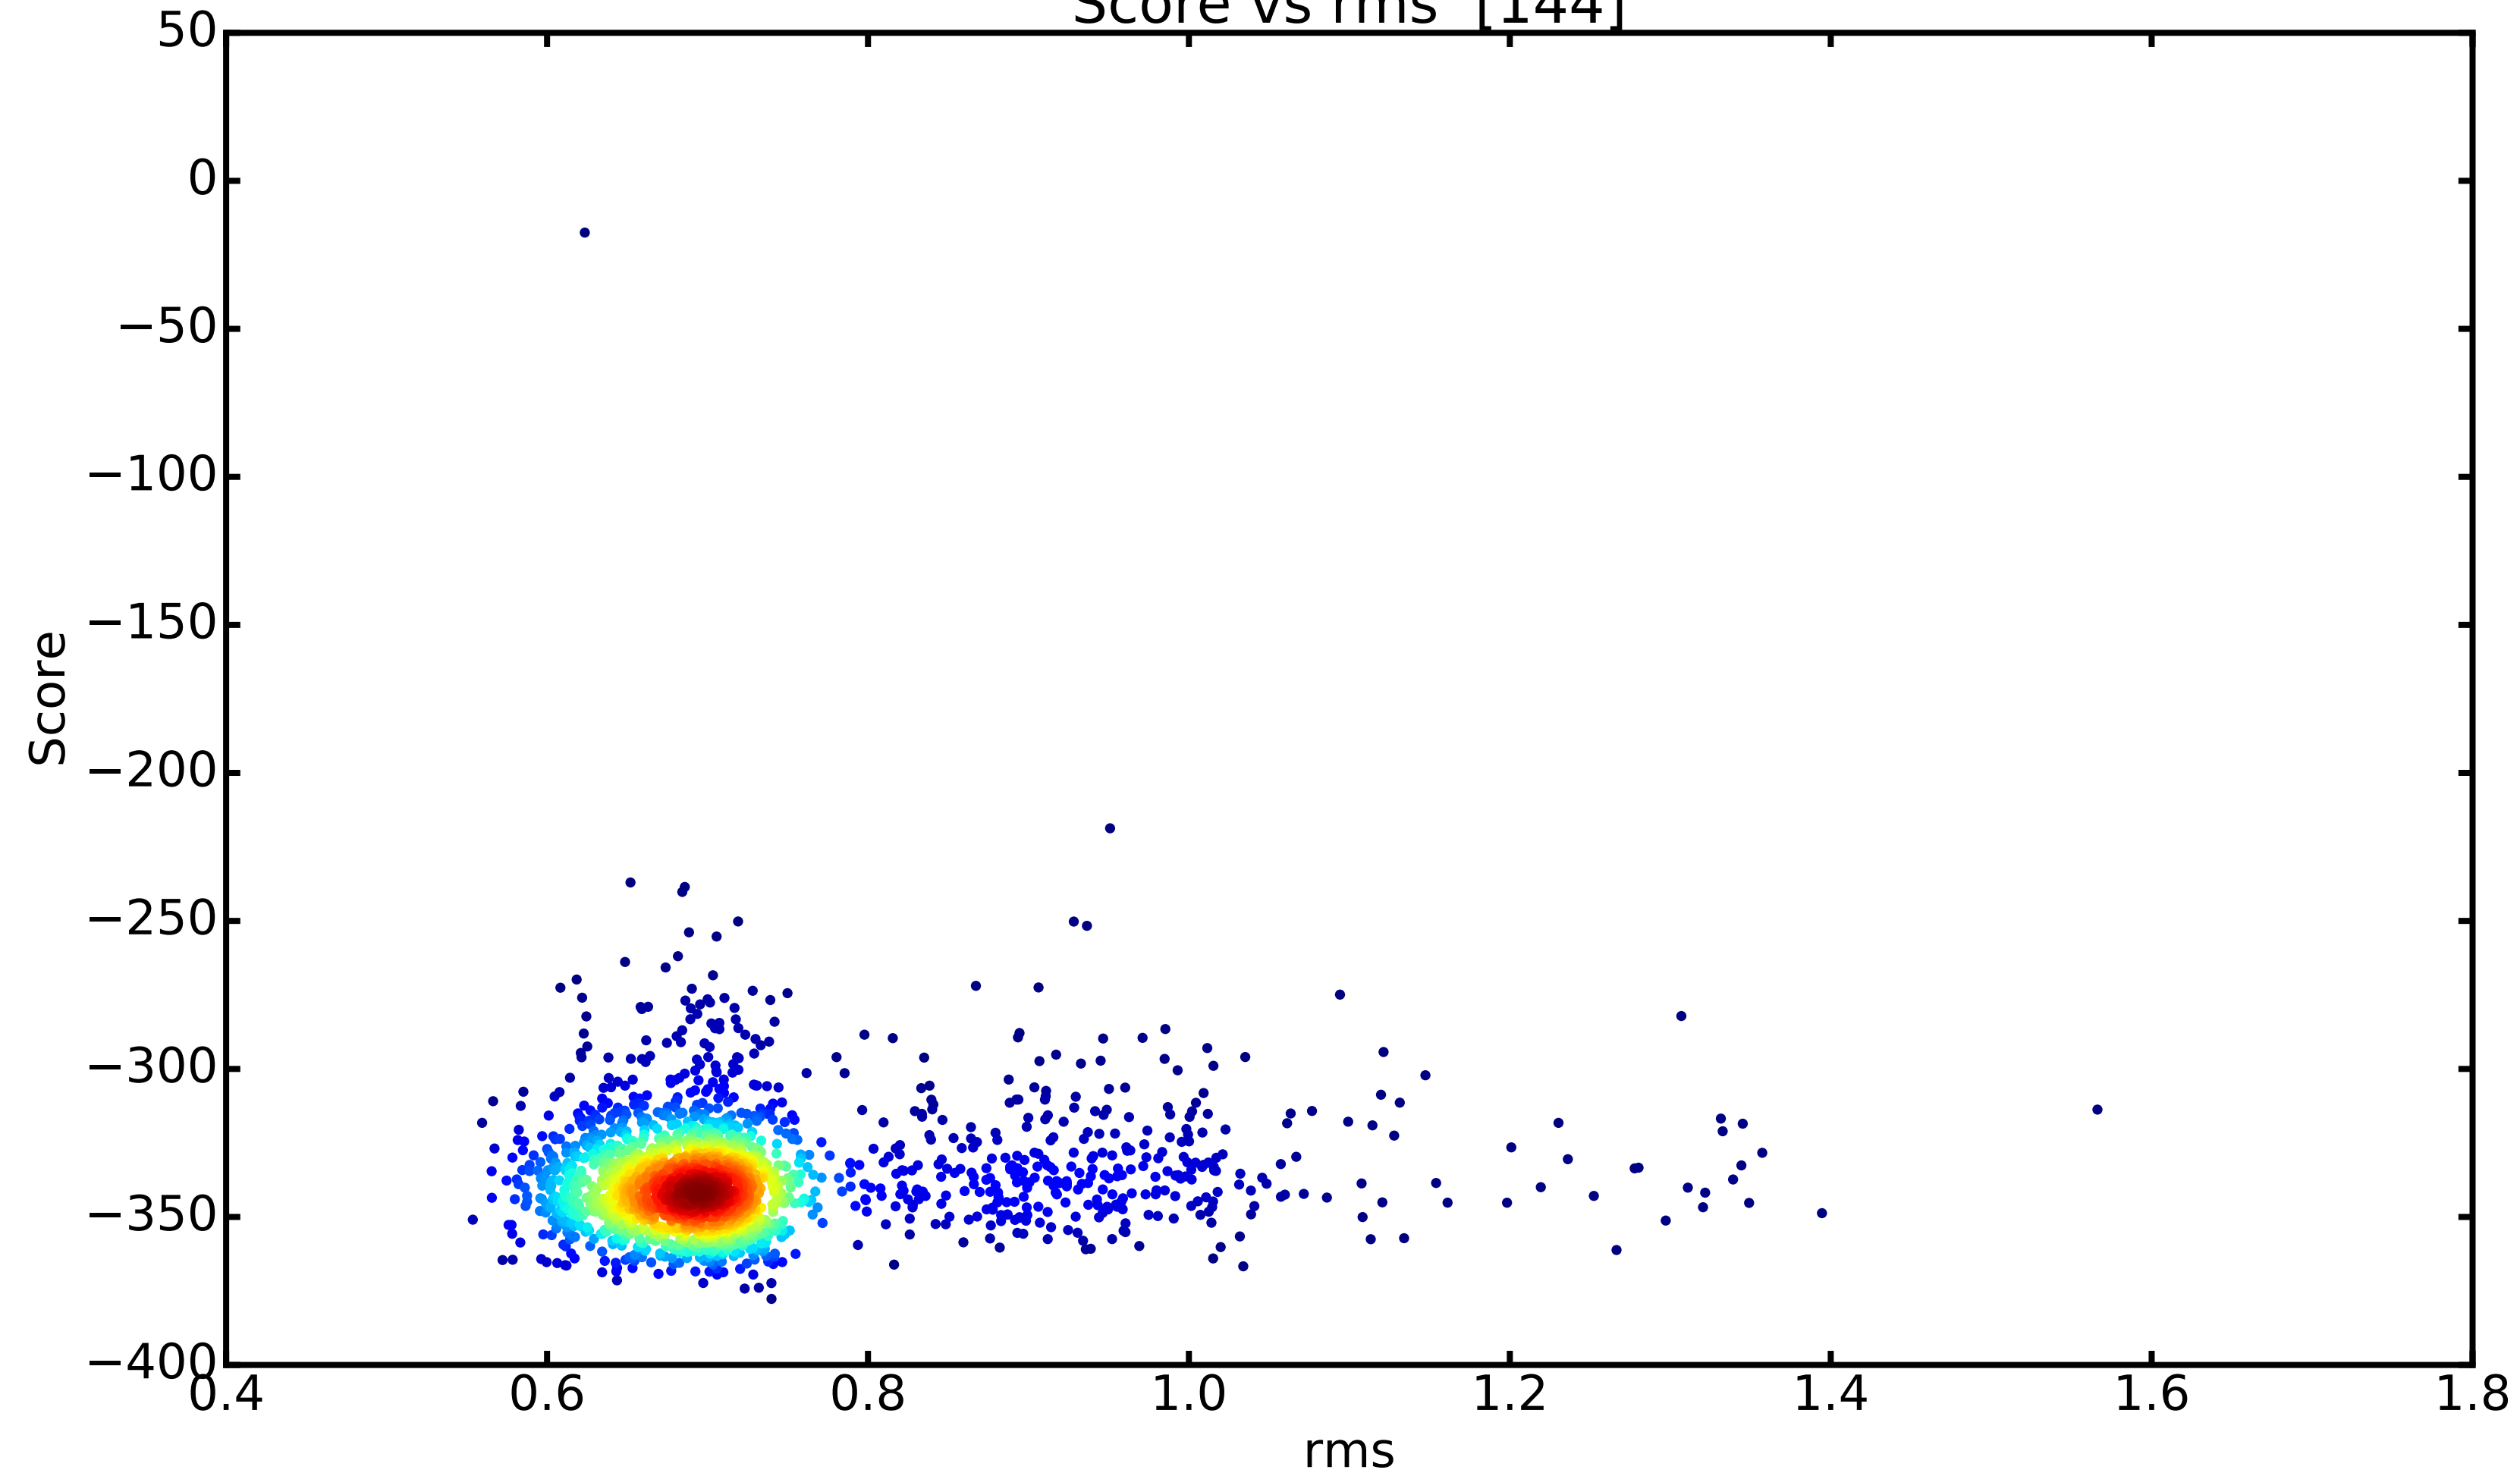

Score vs rms [144]

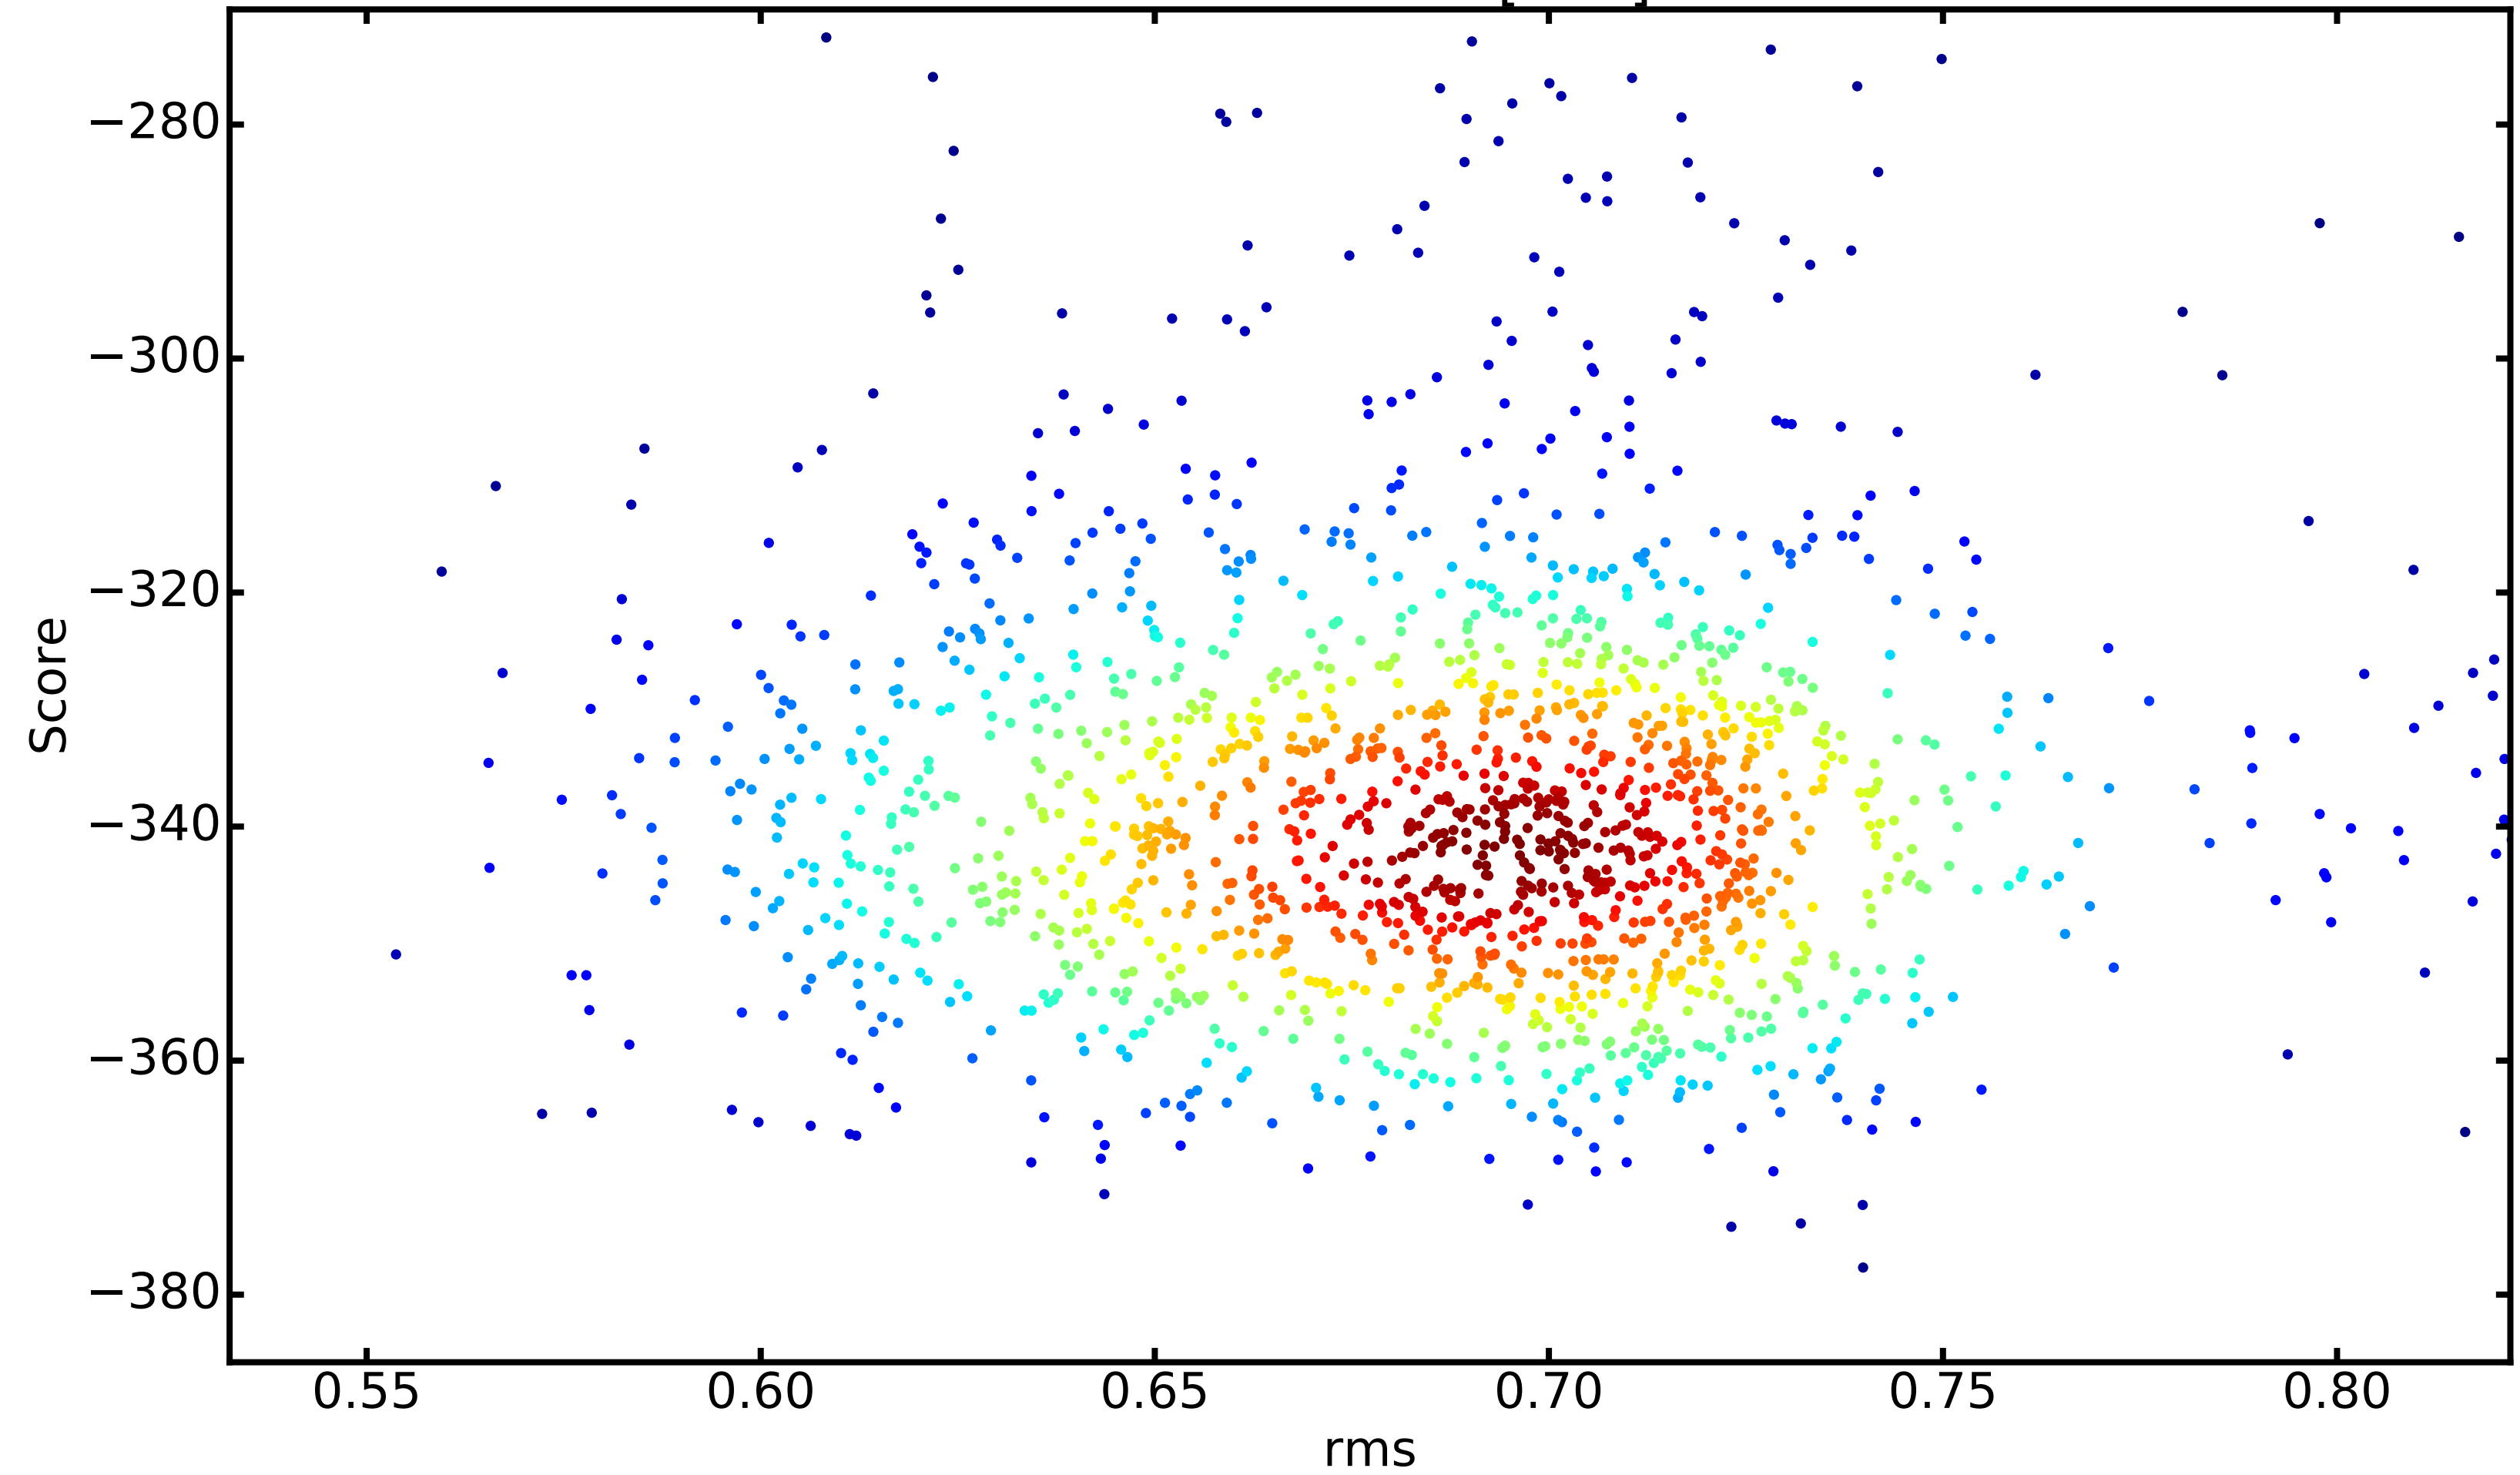

Score vs rms [145]

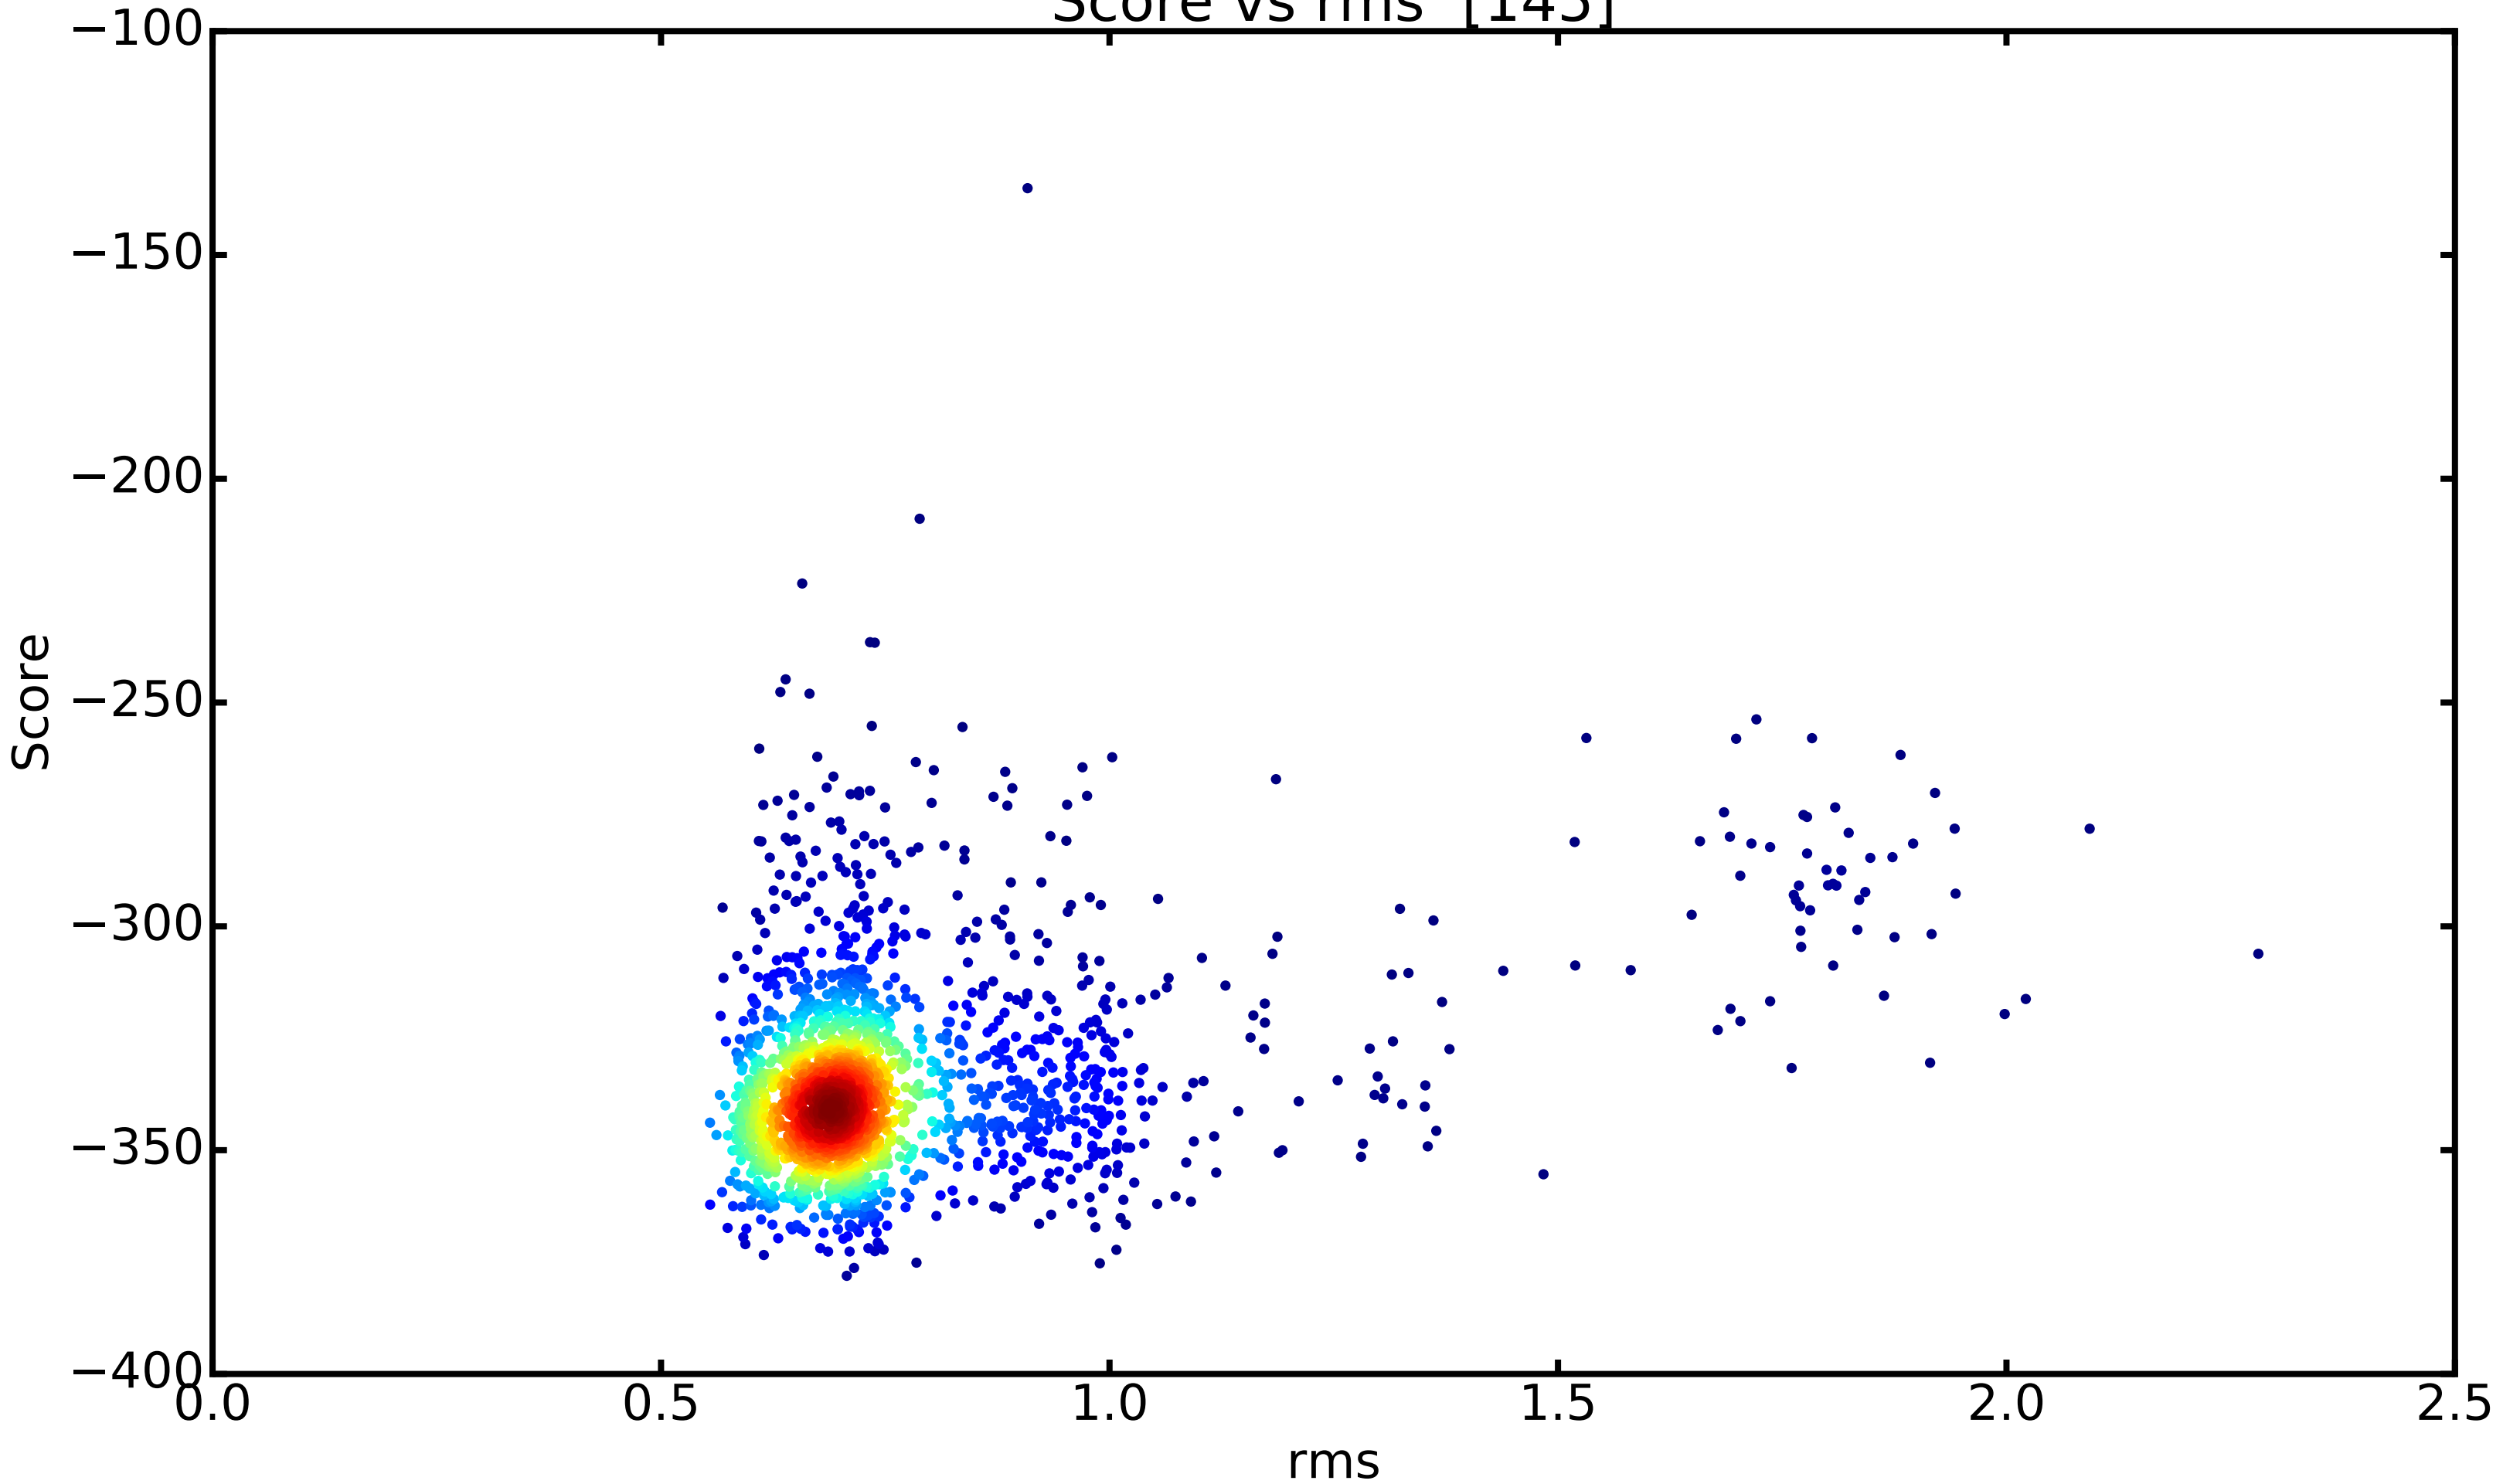

Score vs rms [145]

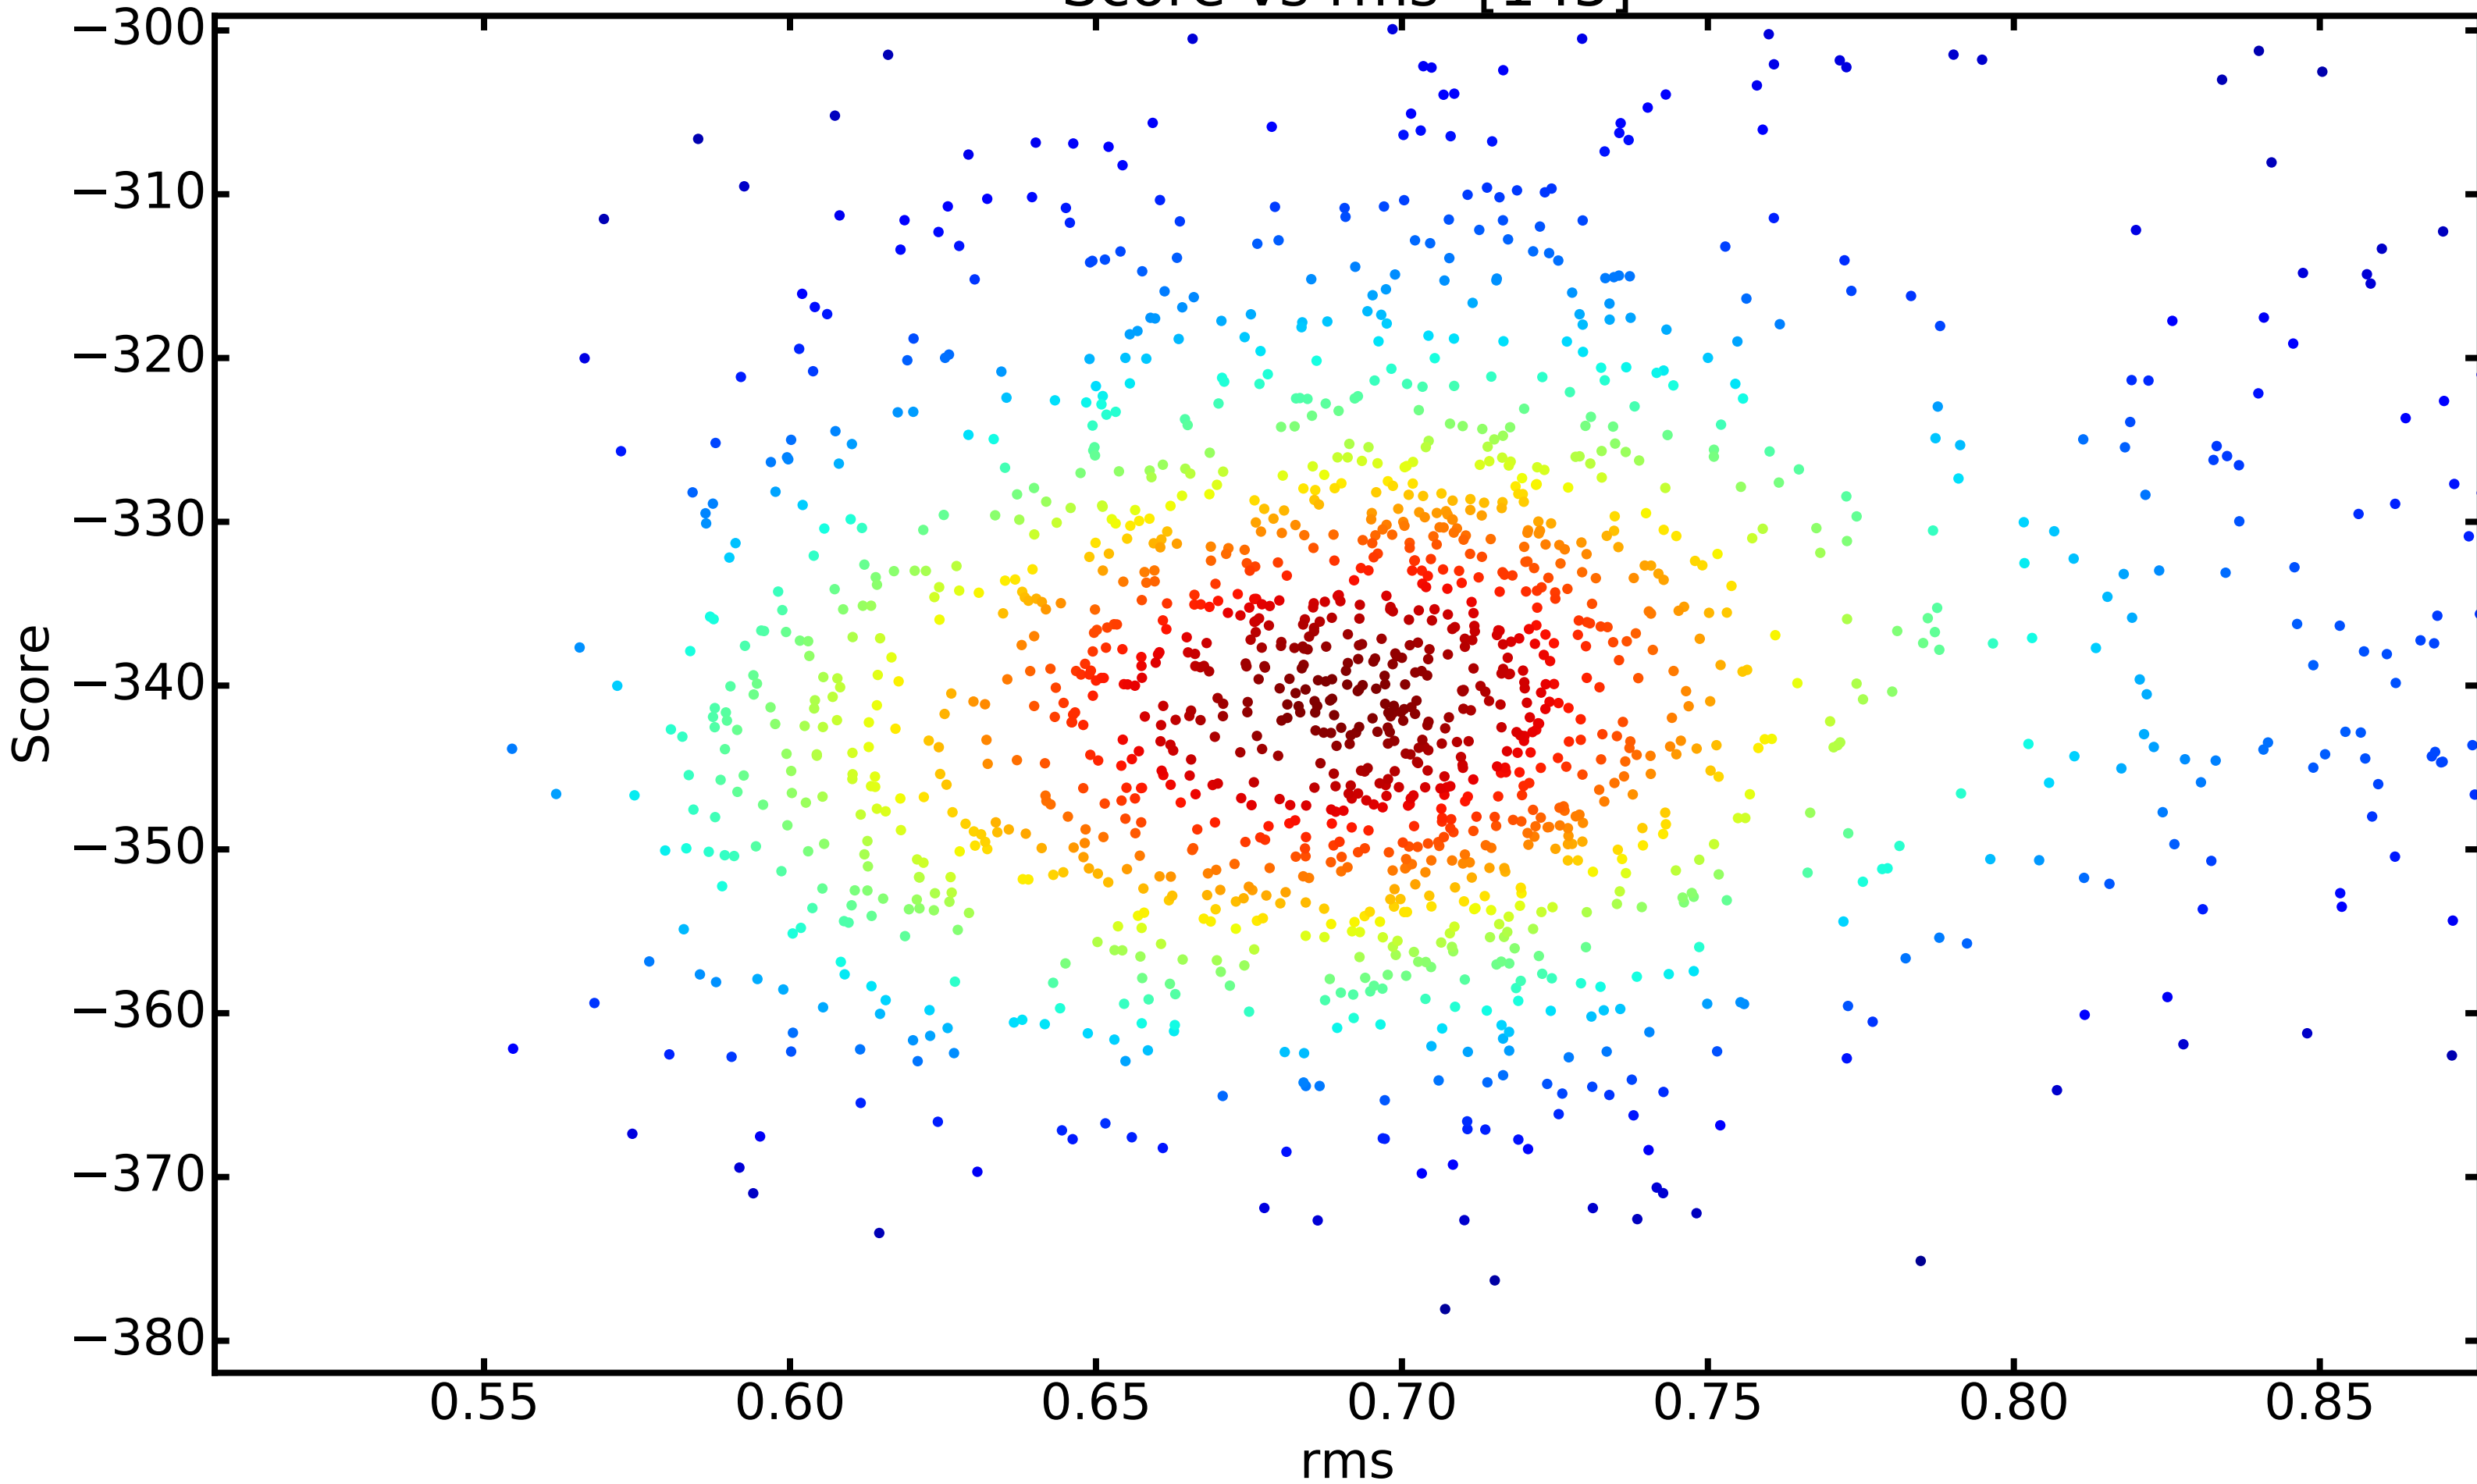

Score vs rms [162]

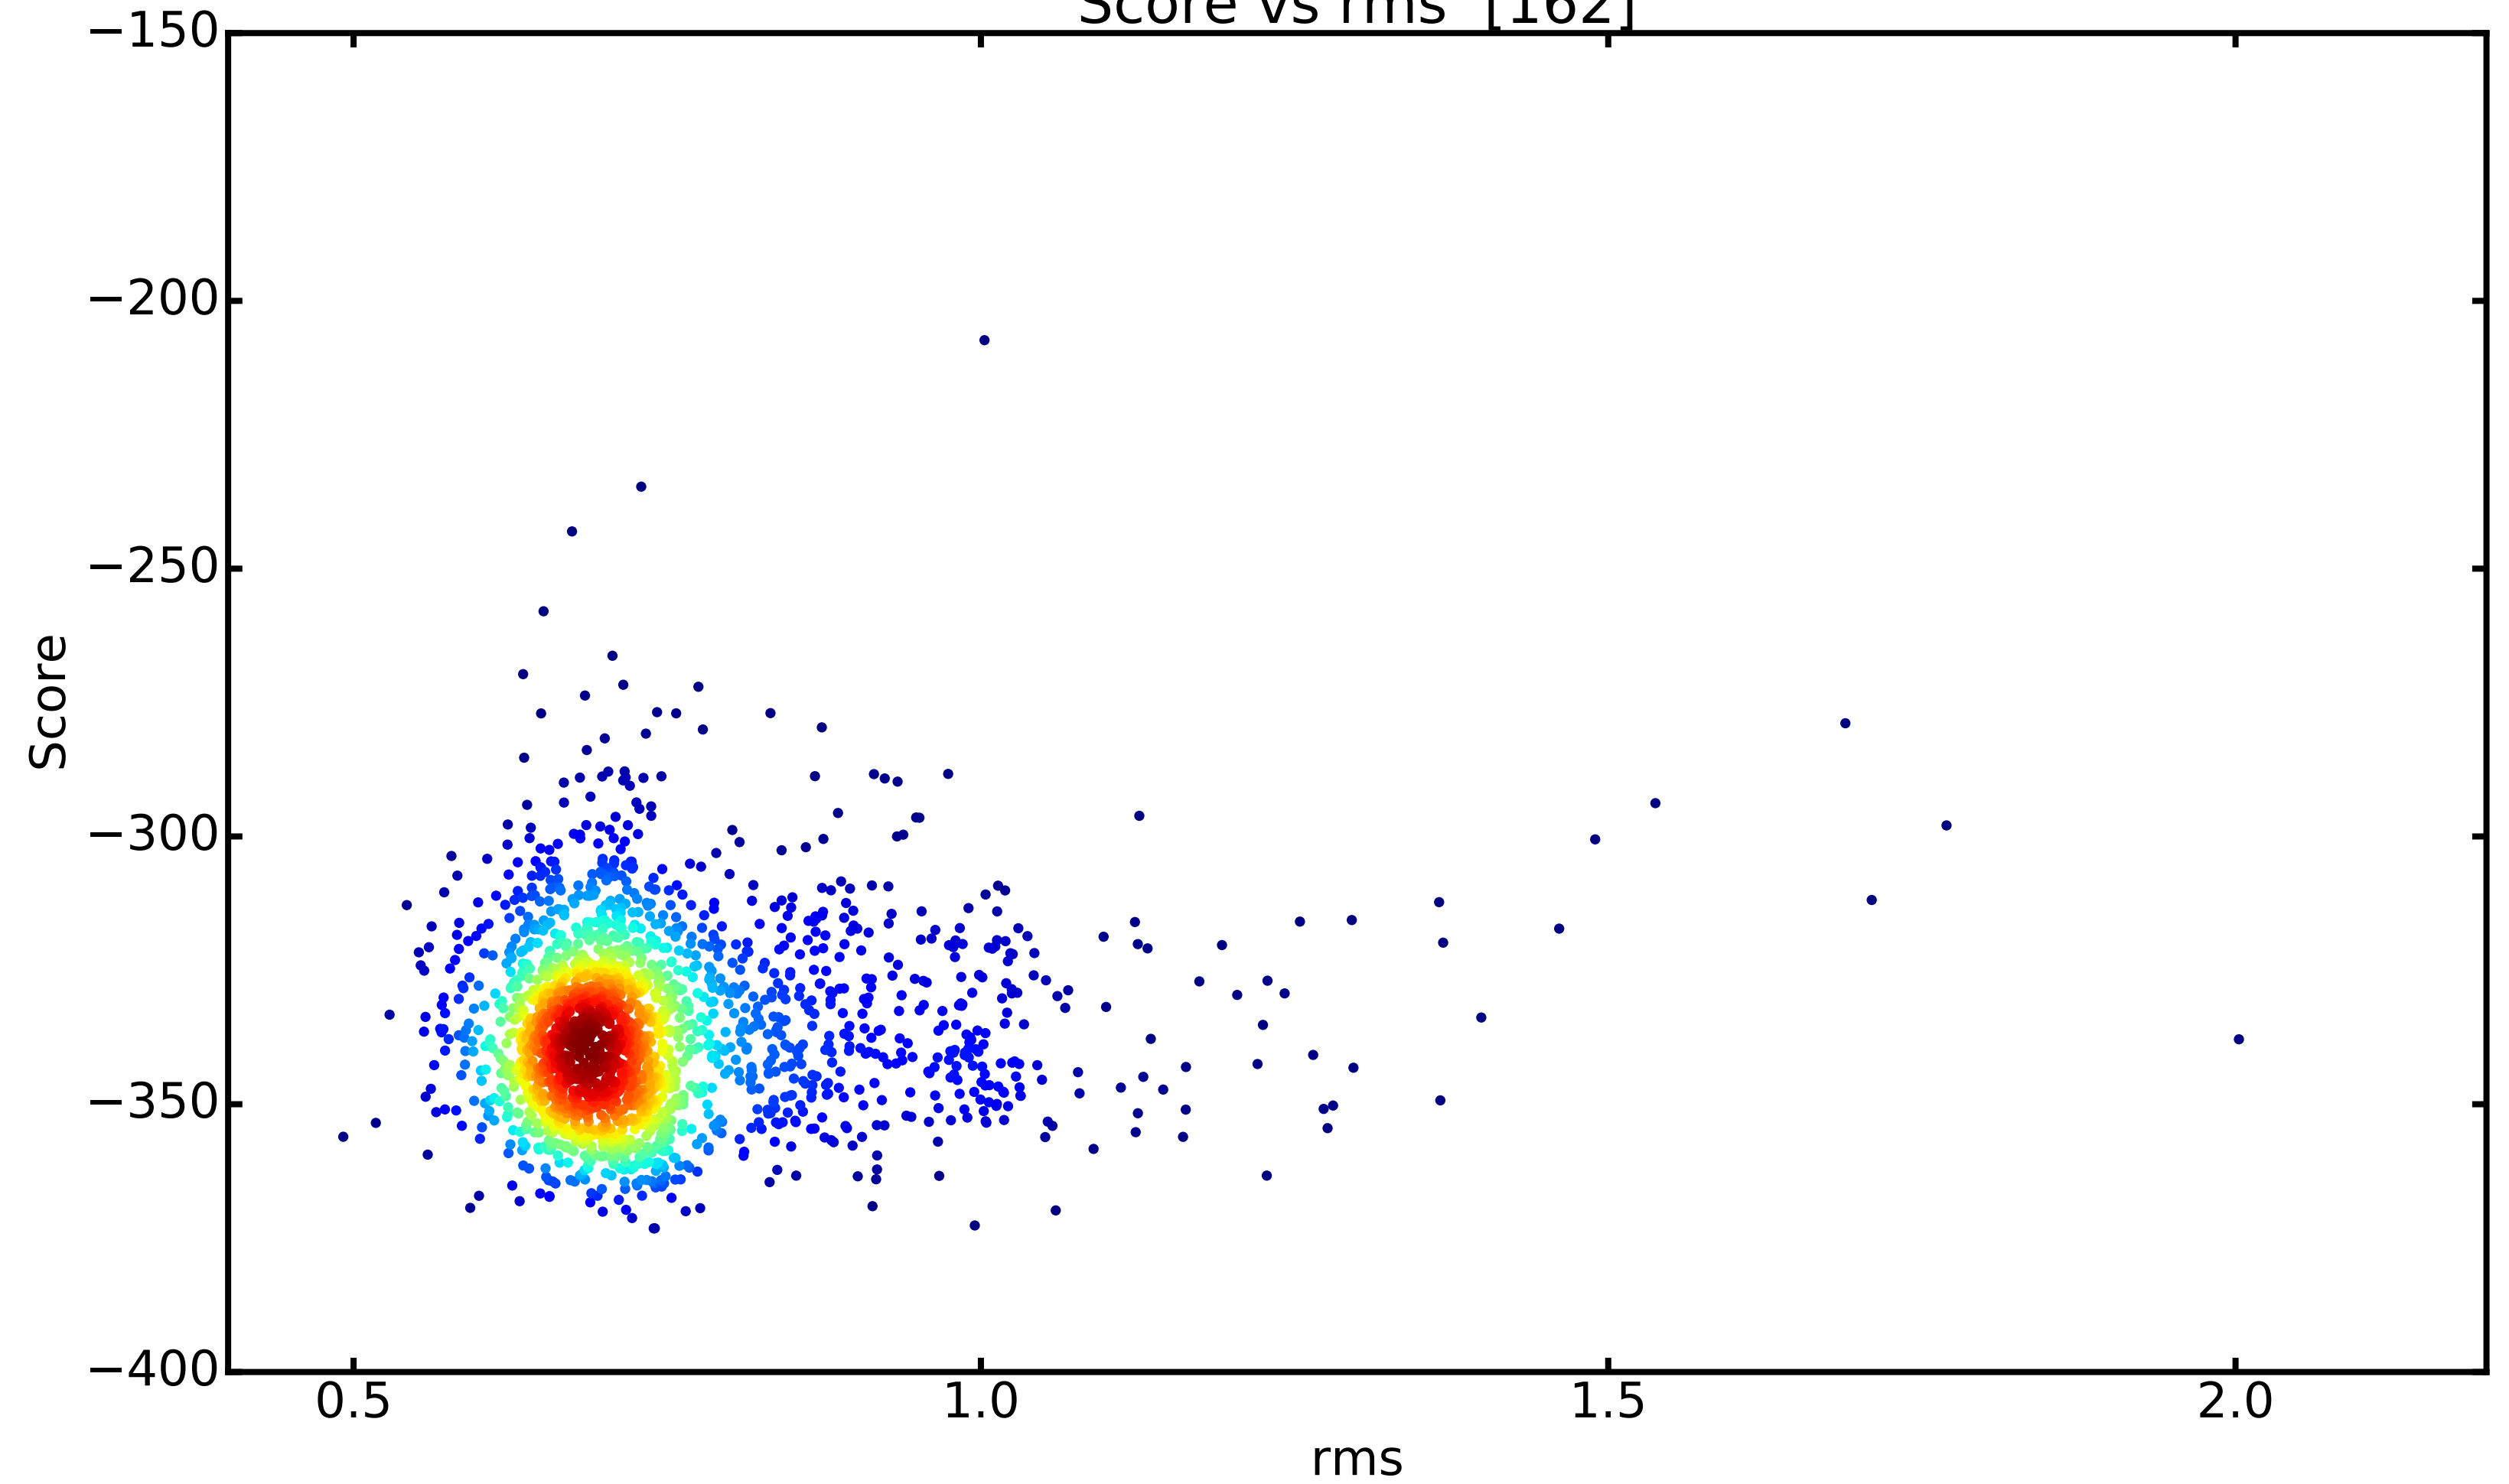

Score vs rms [162]

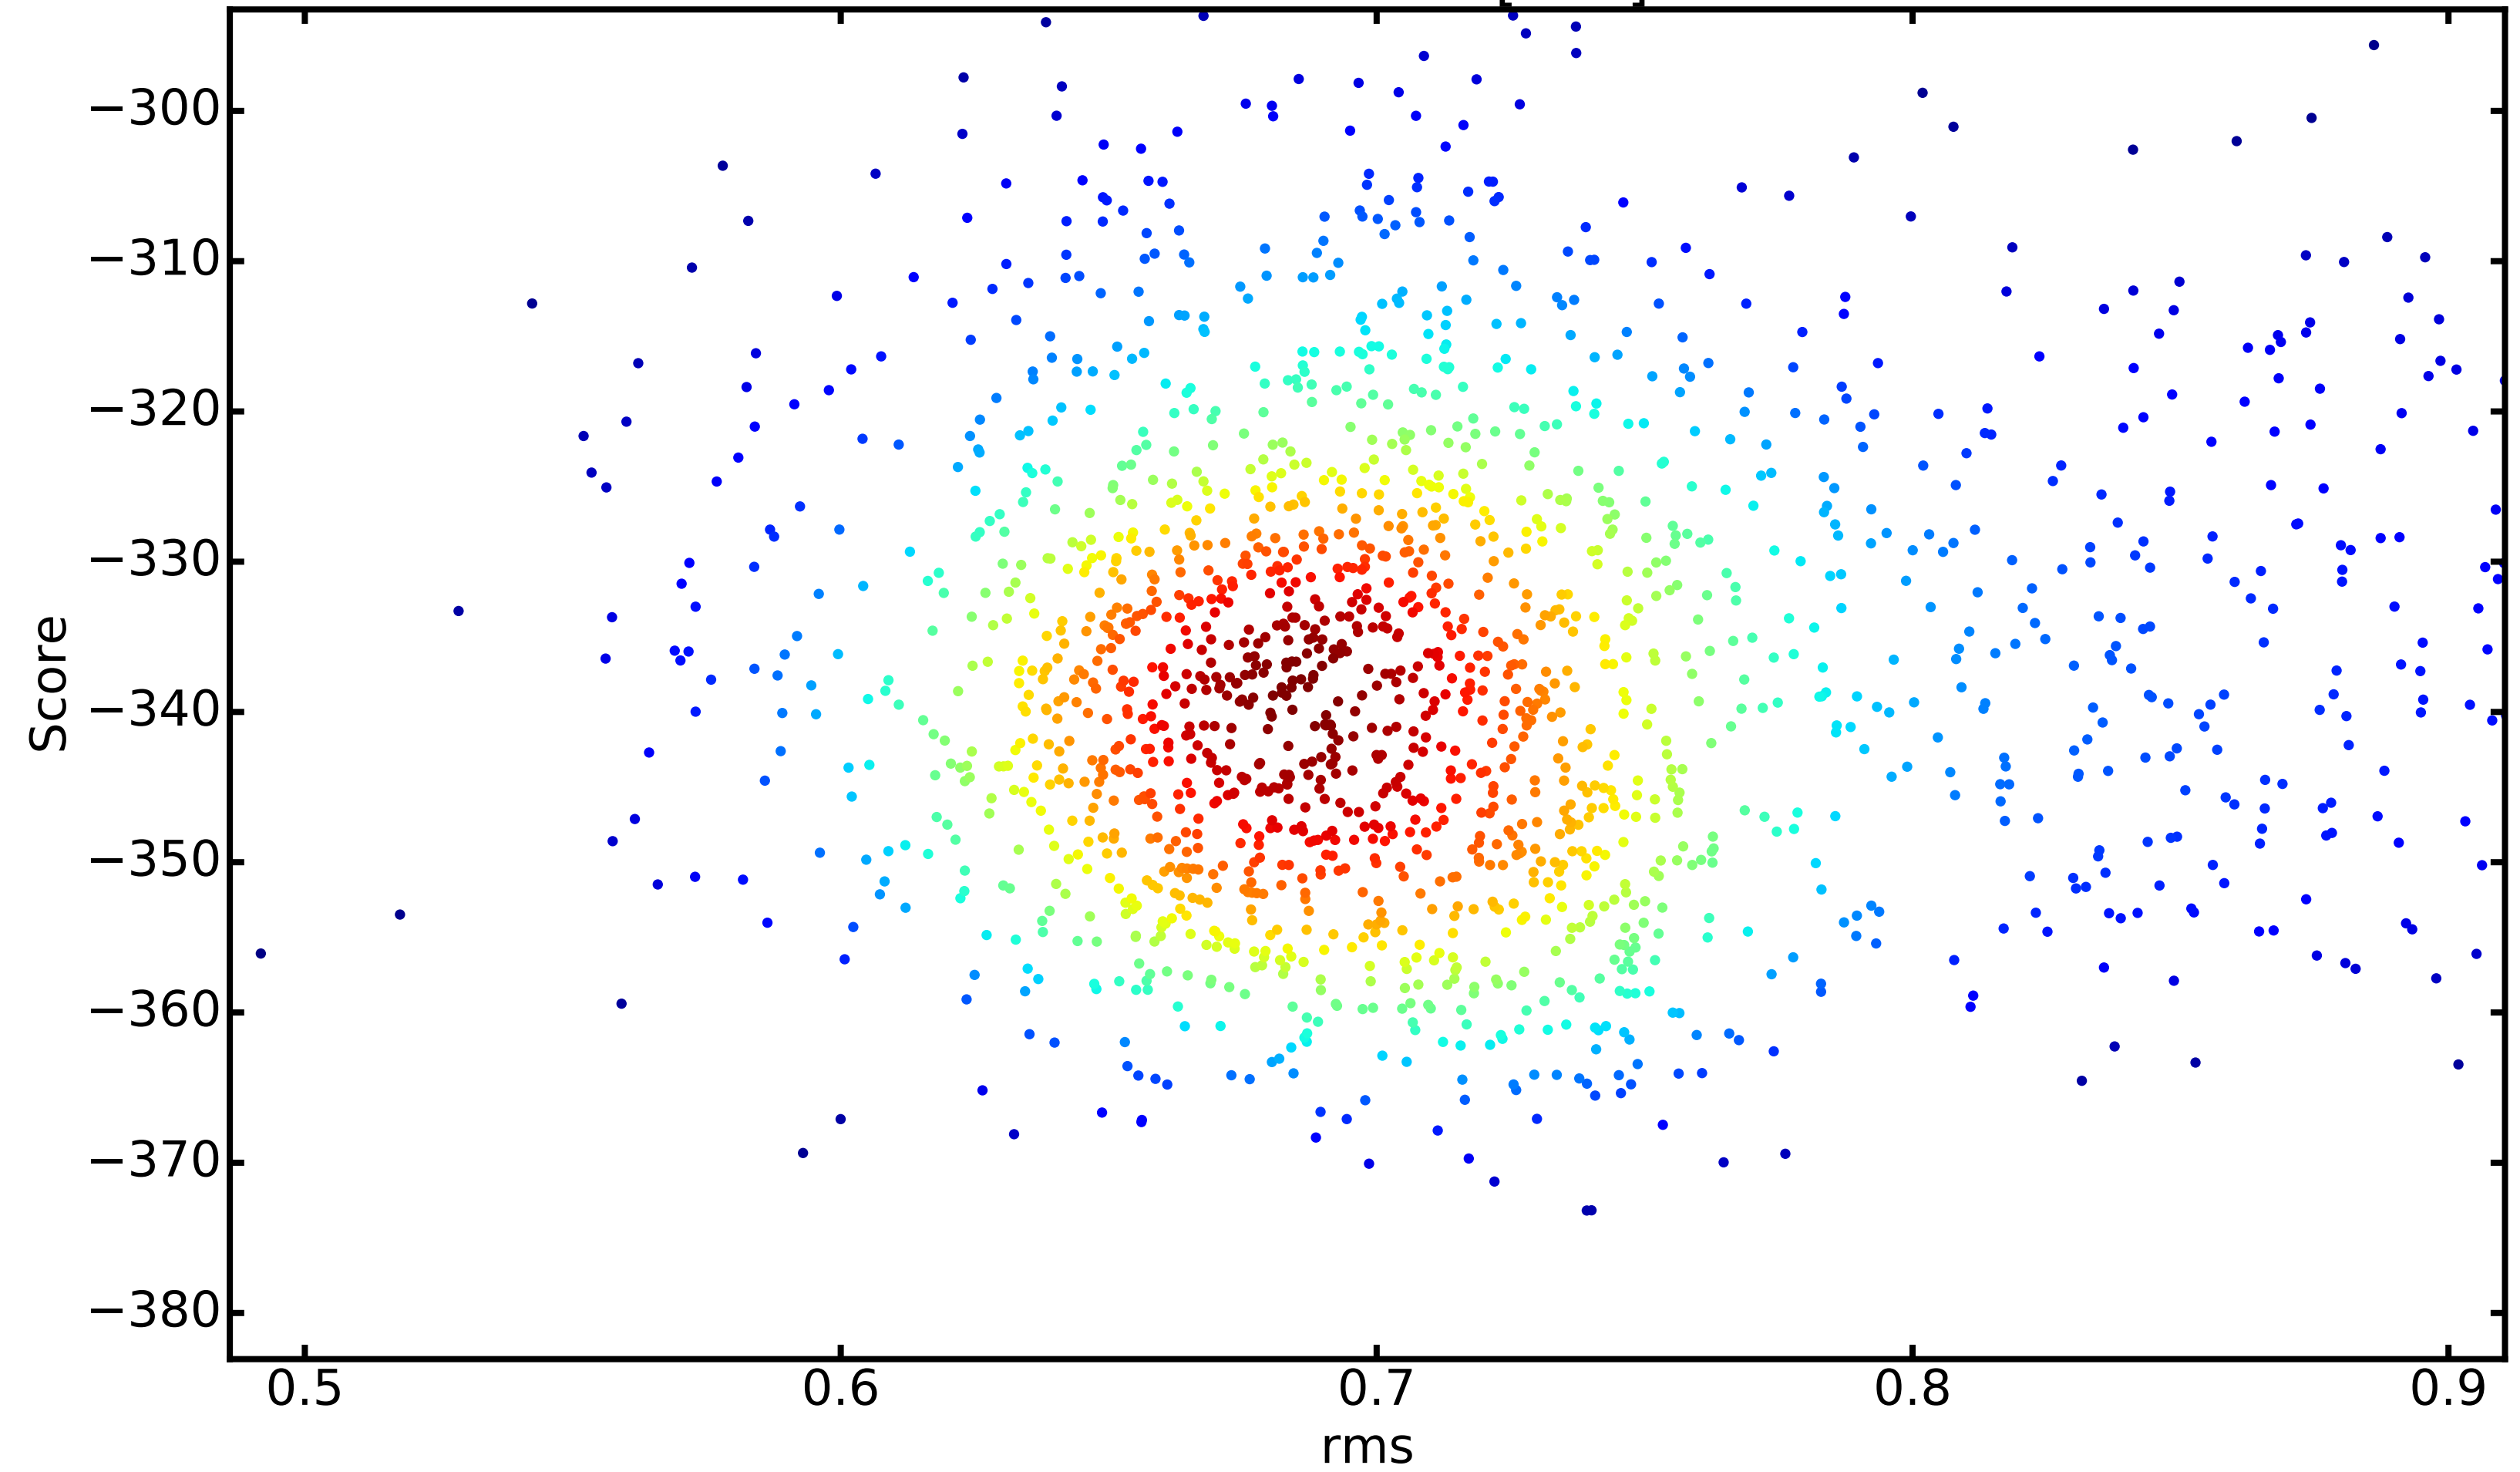



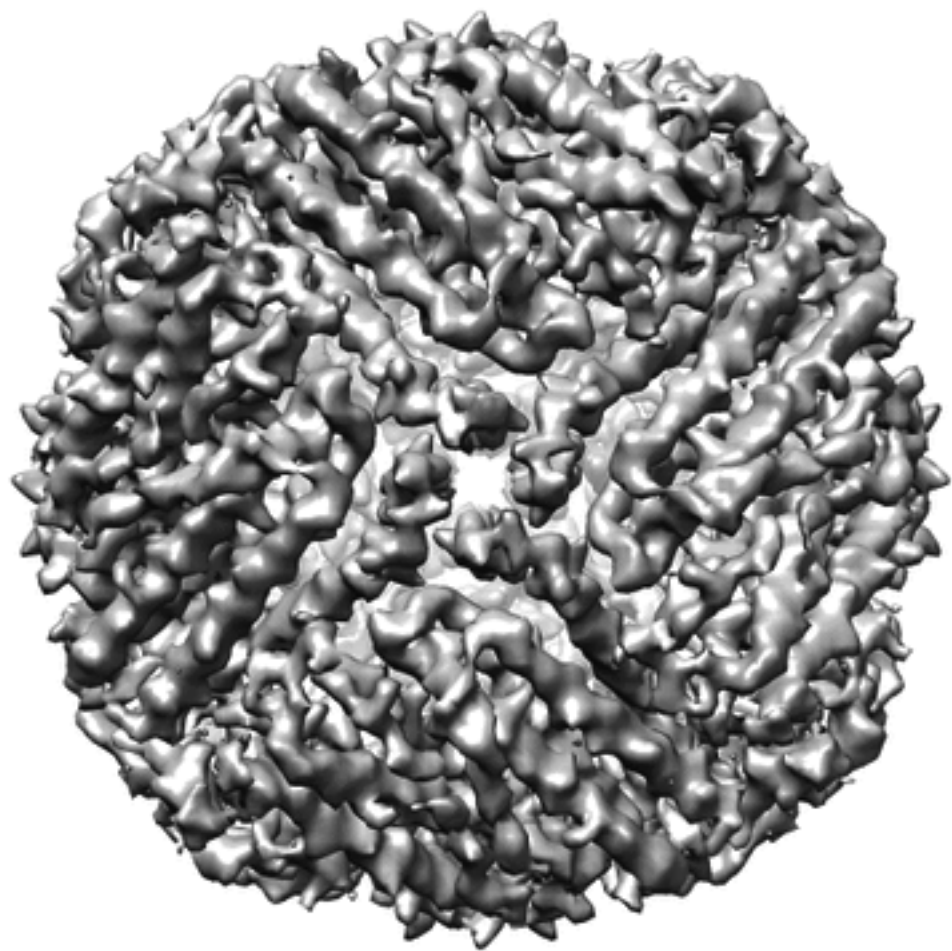

Score vs rms [112]

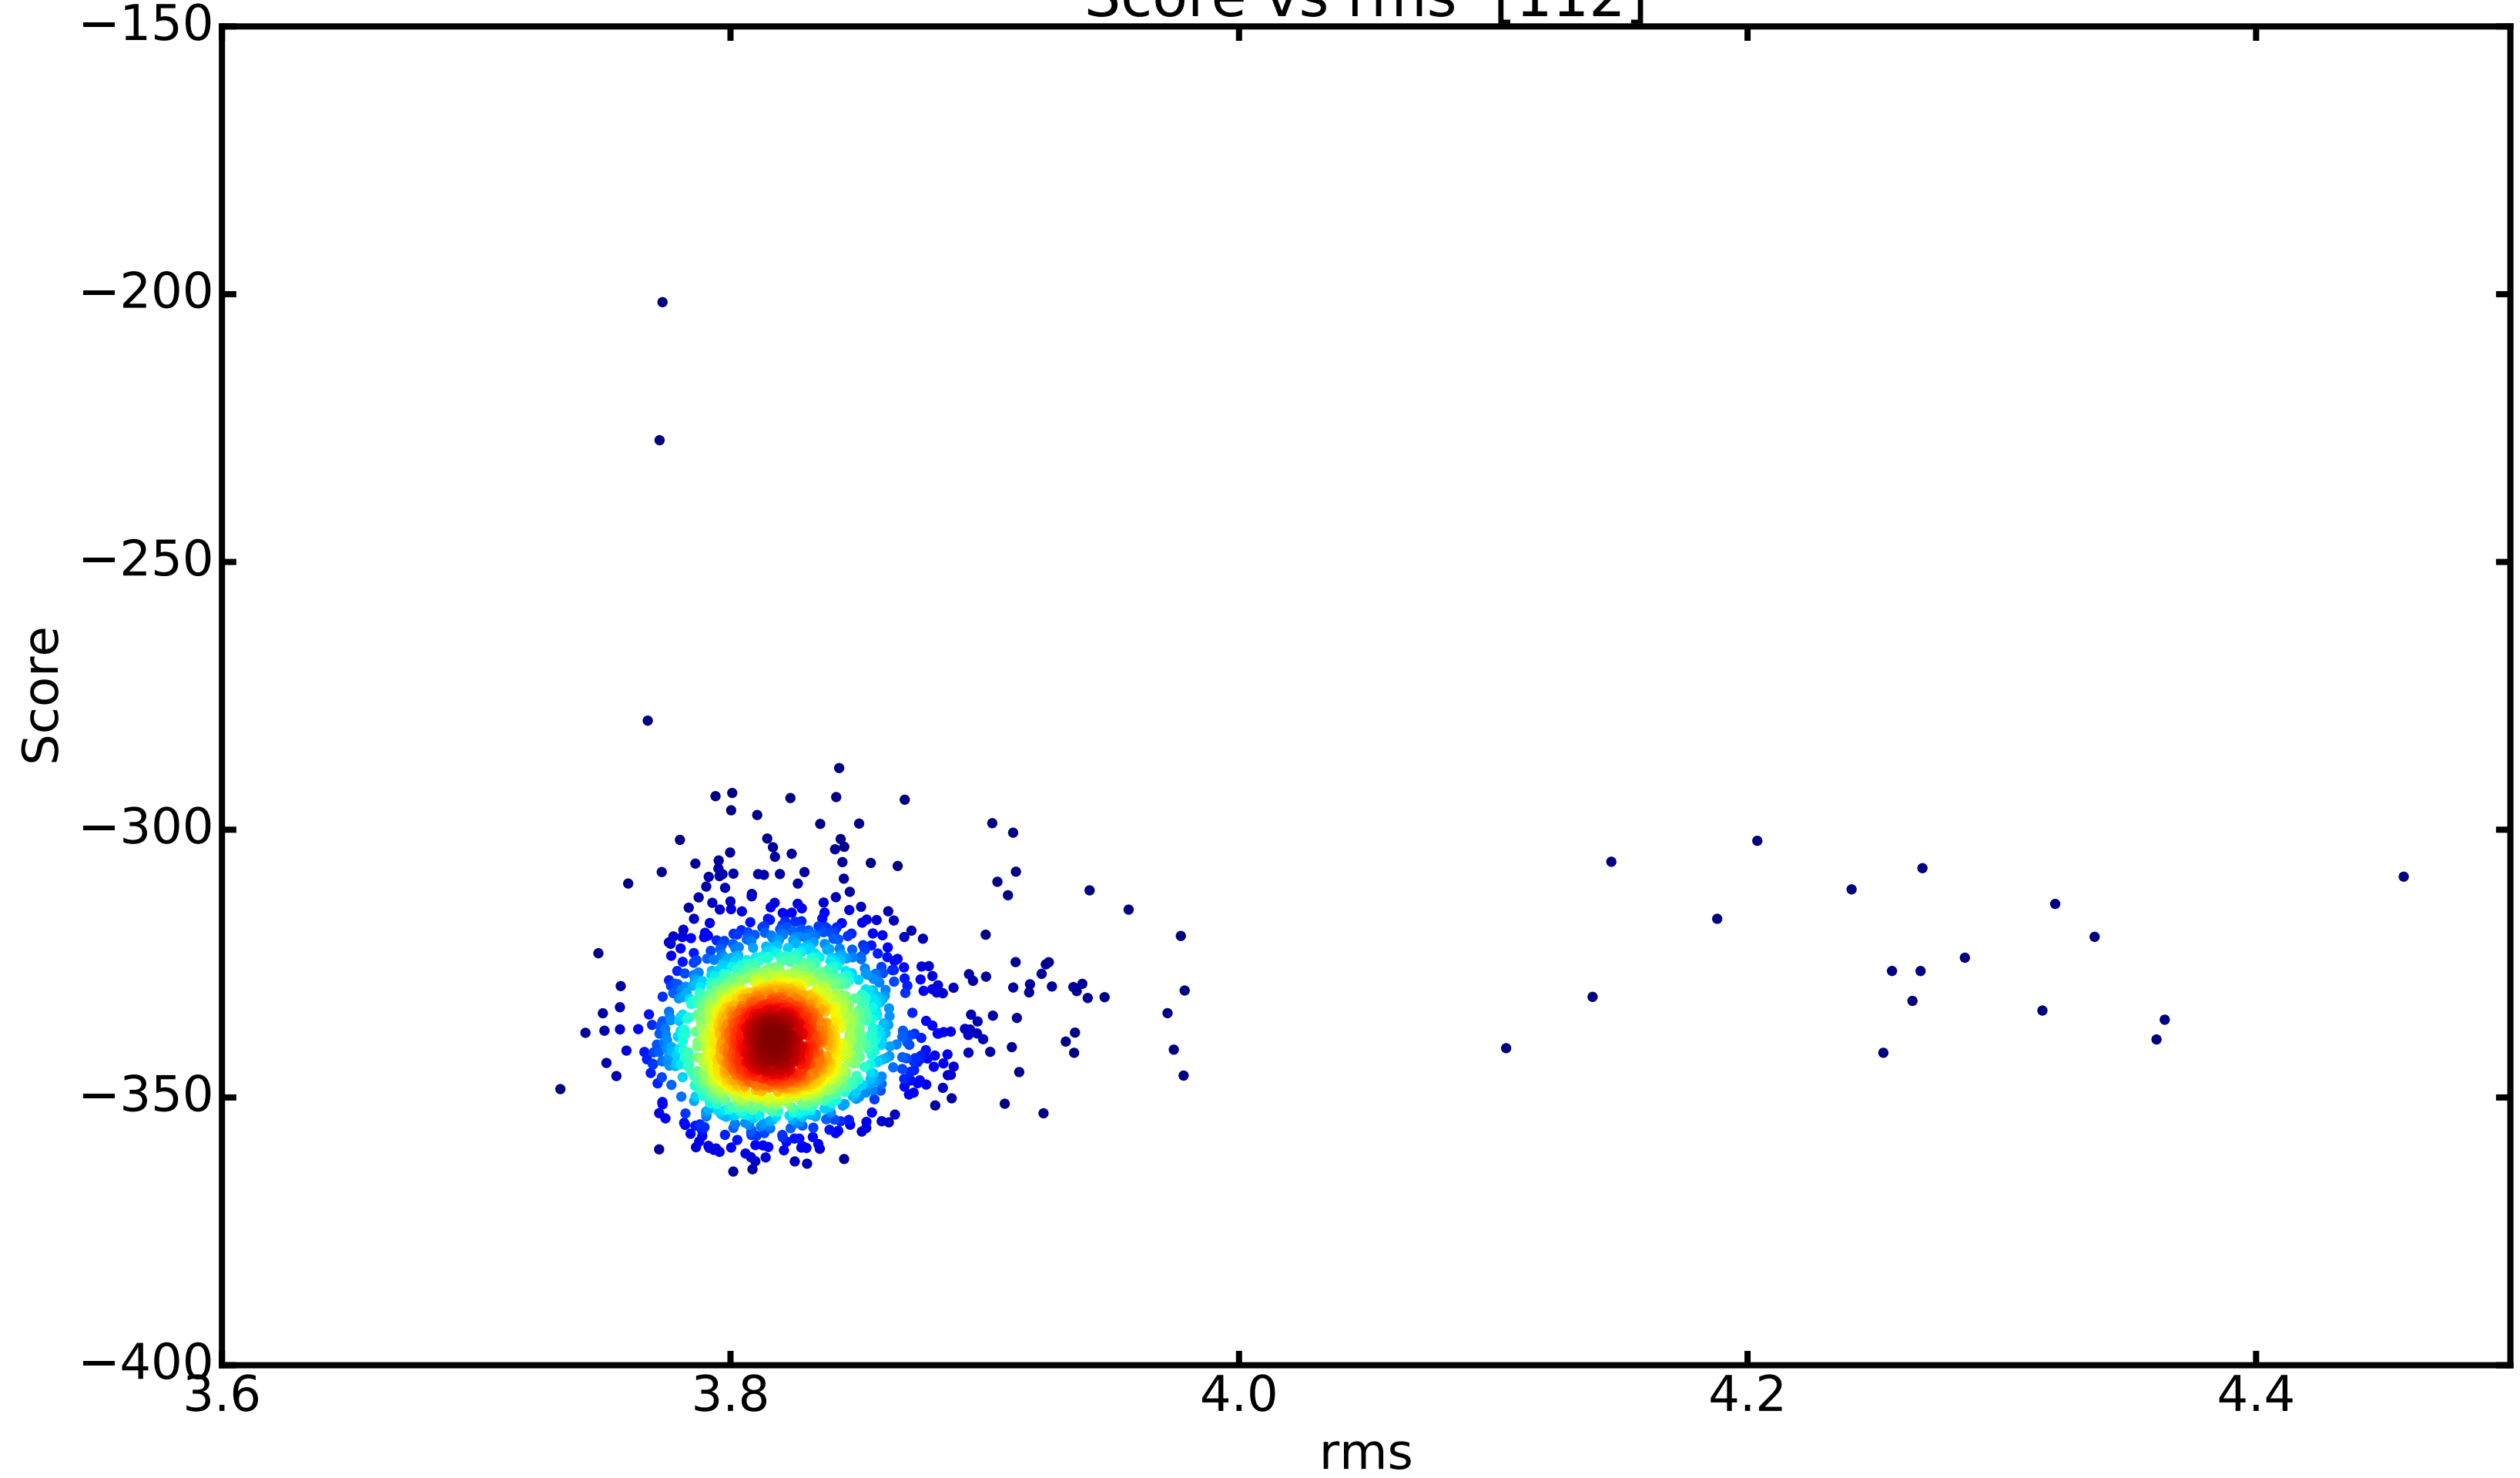

Score vs rms [112]

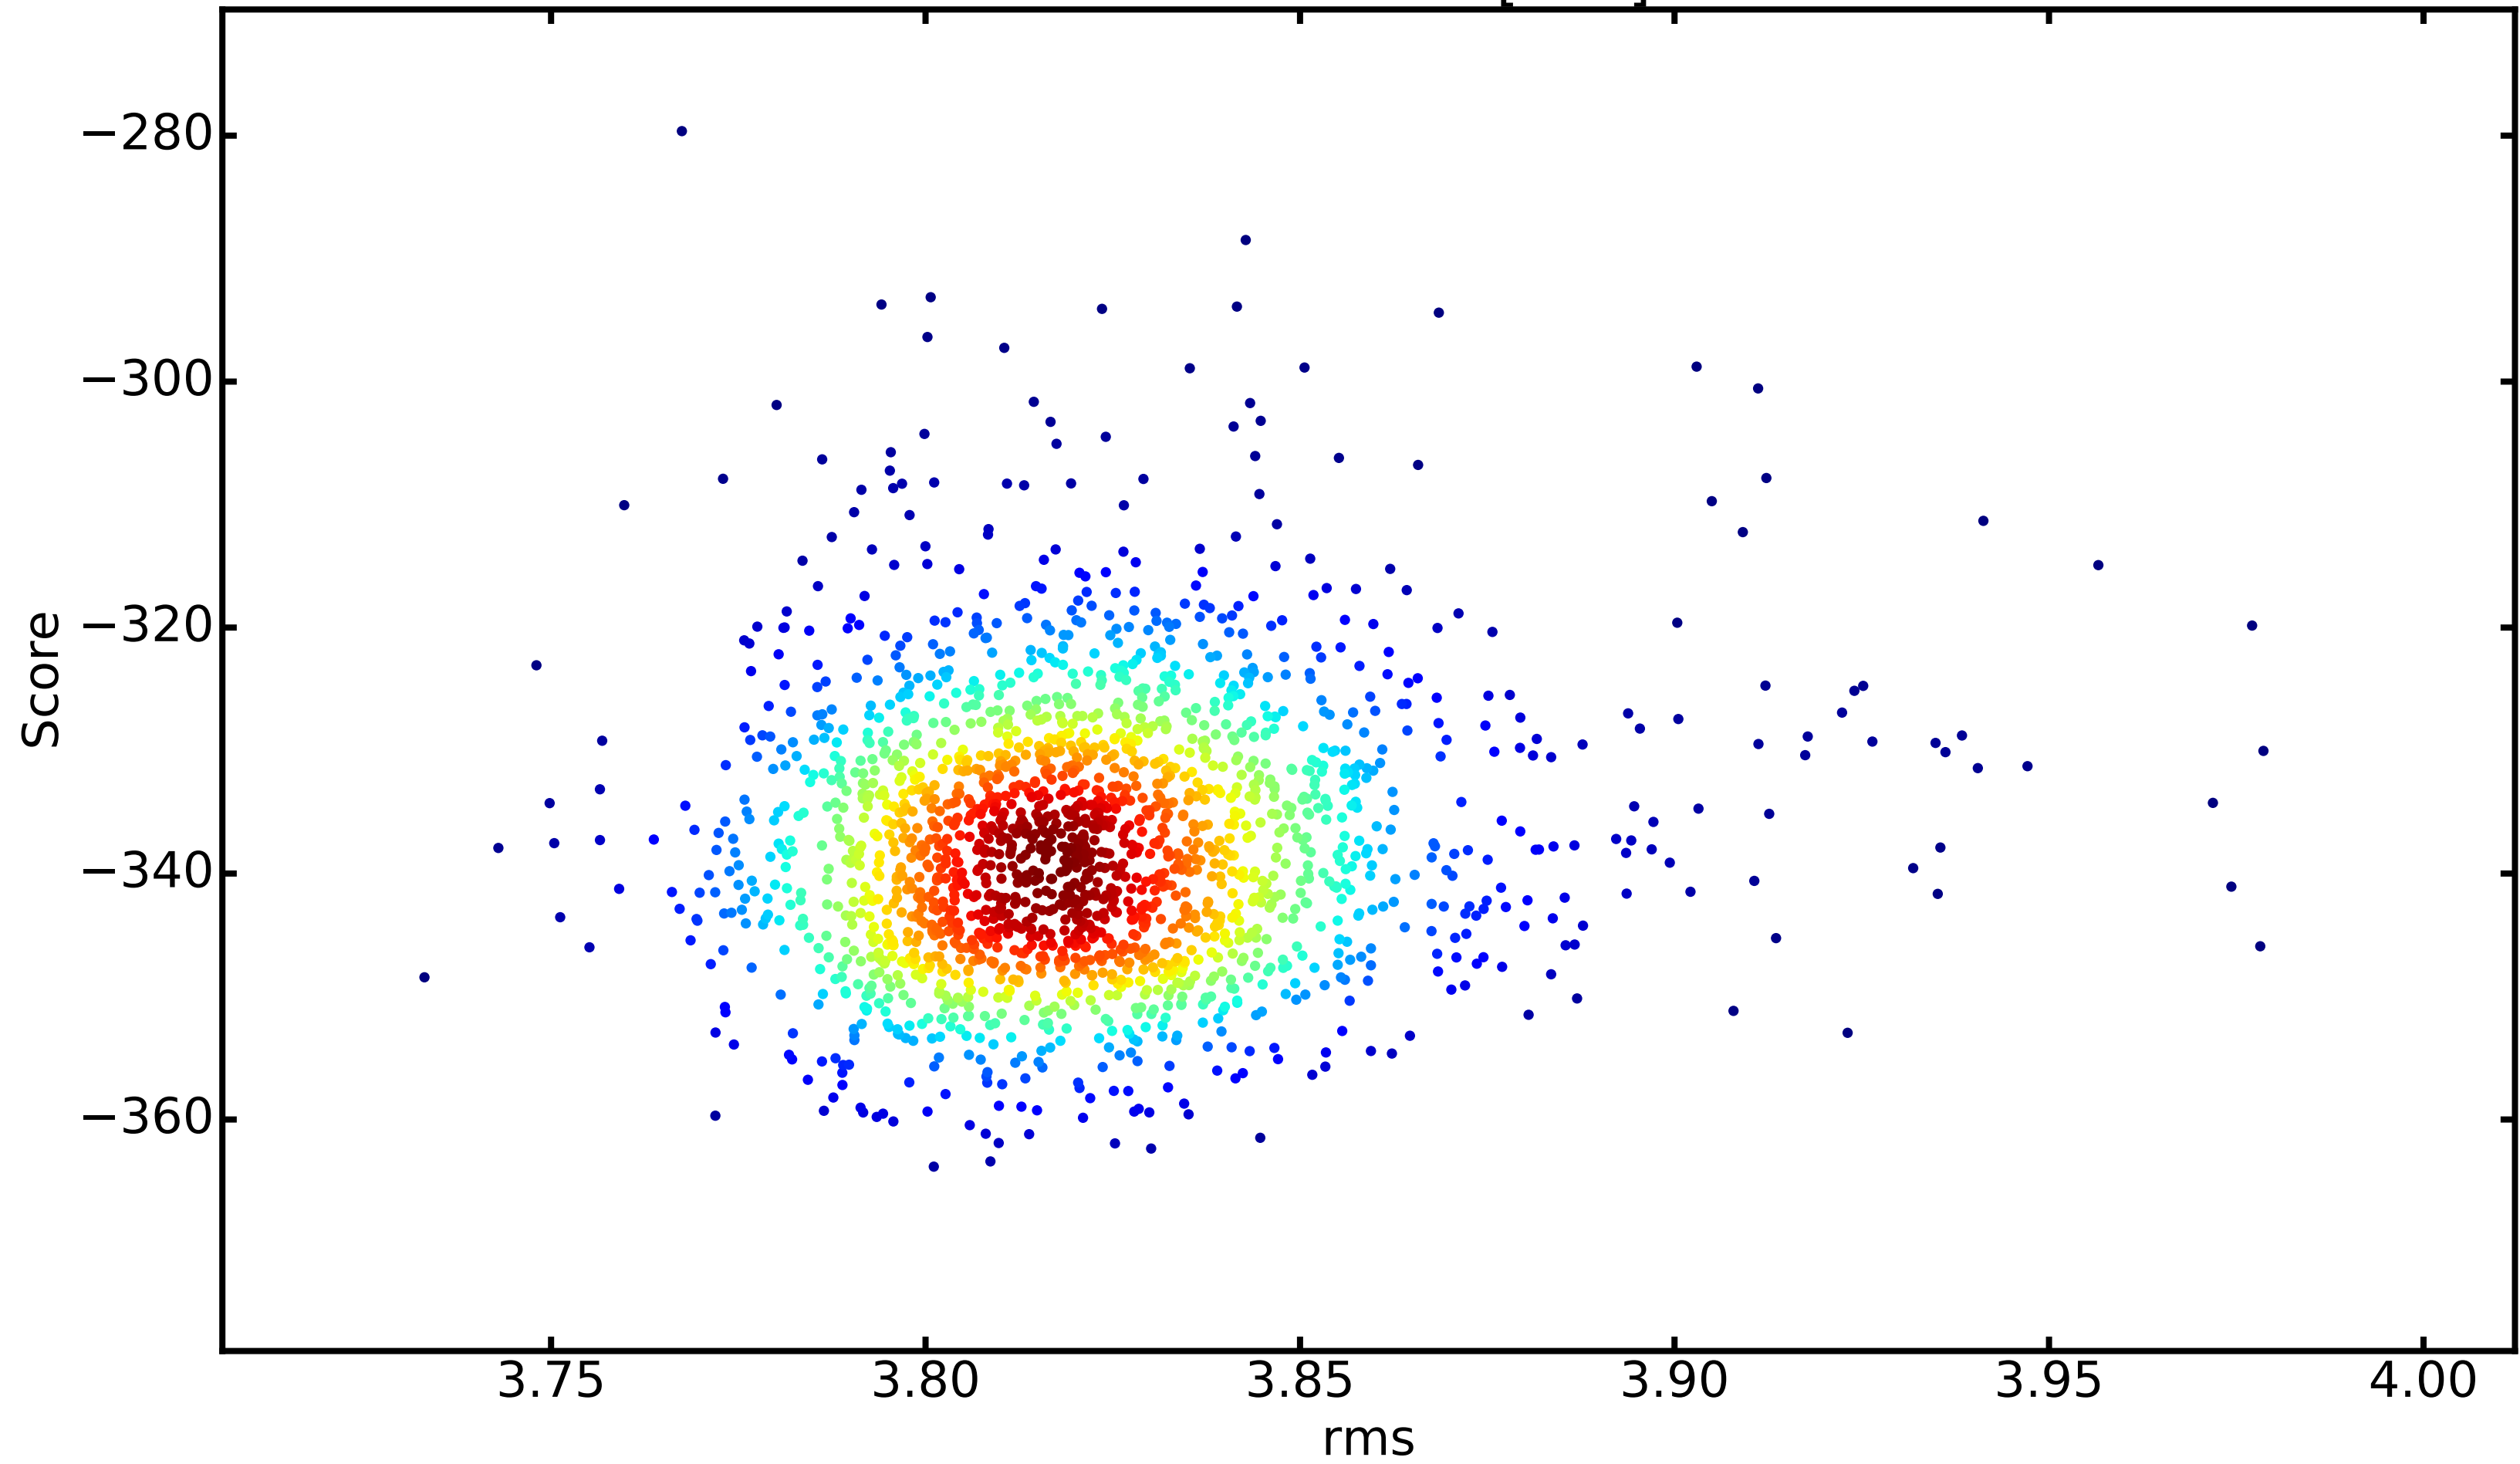

Score vs rms [118]

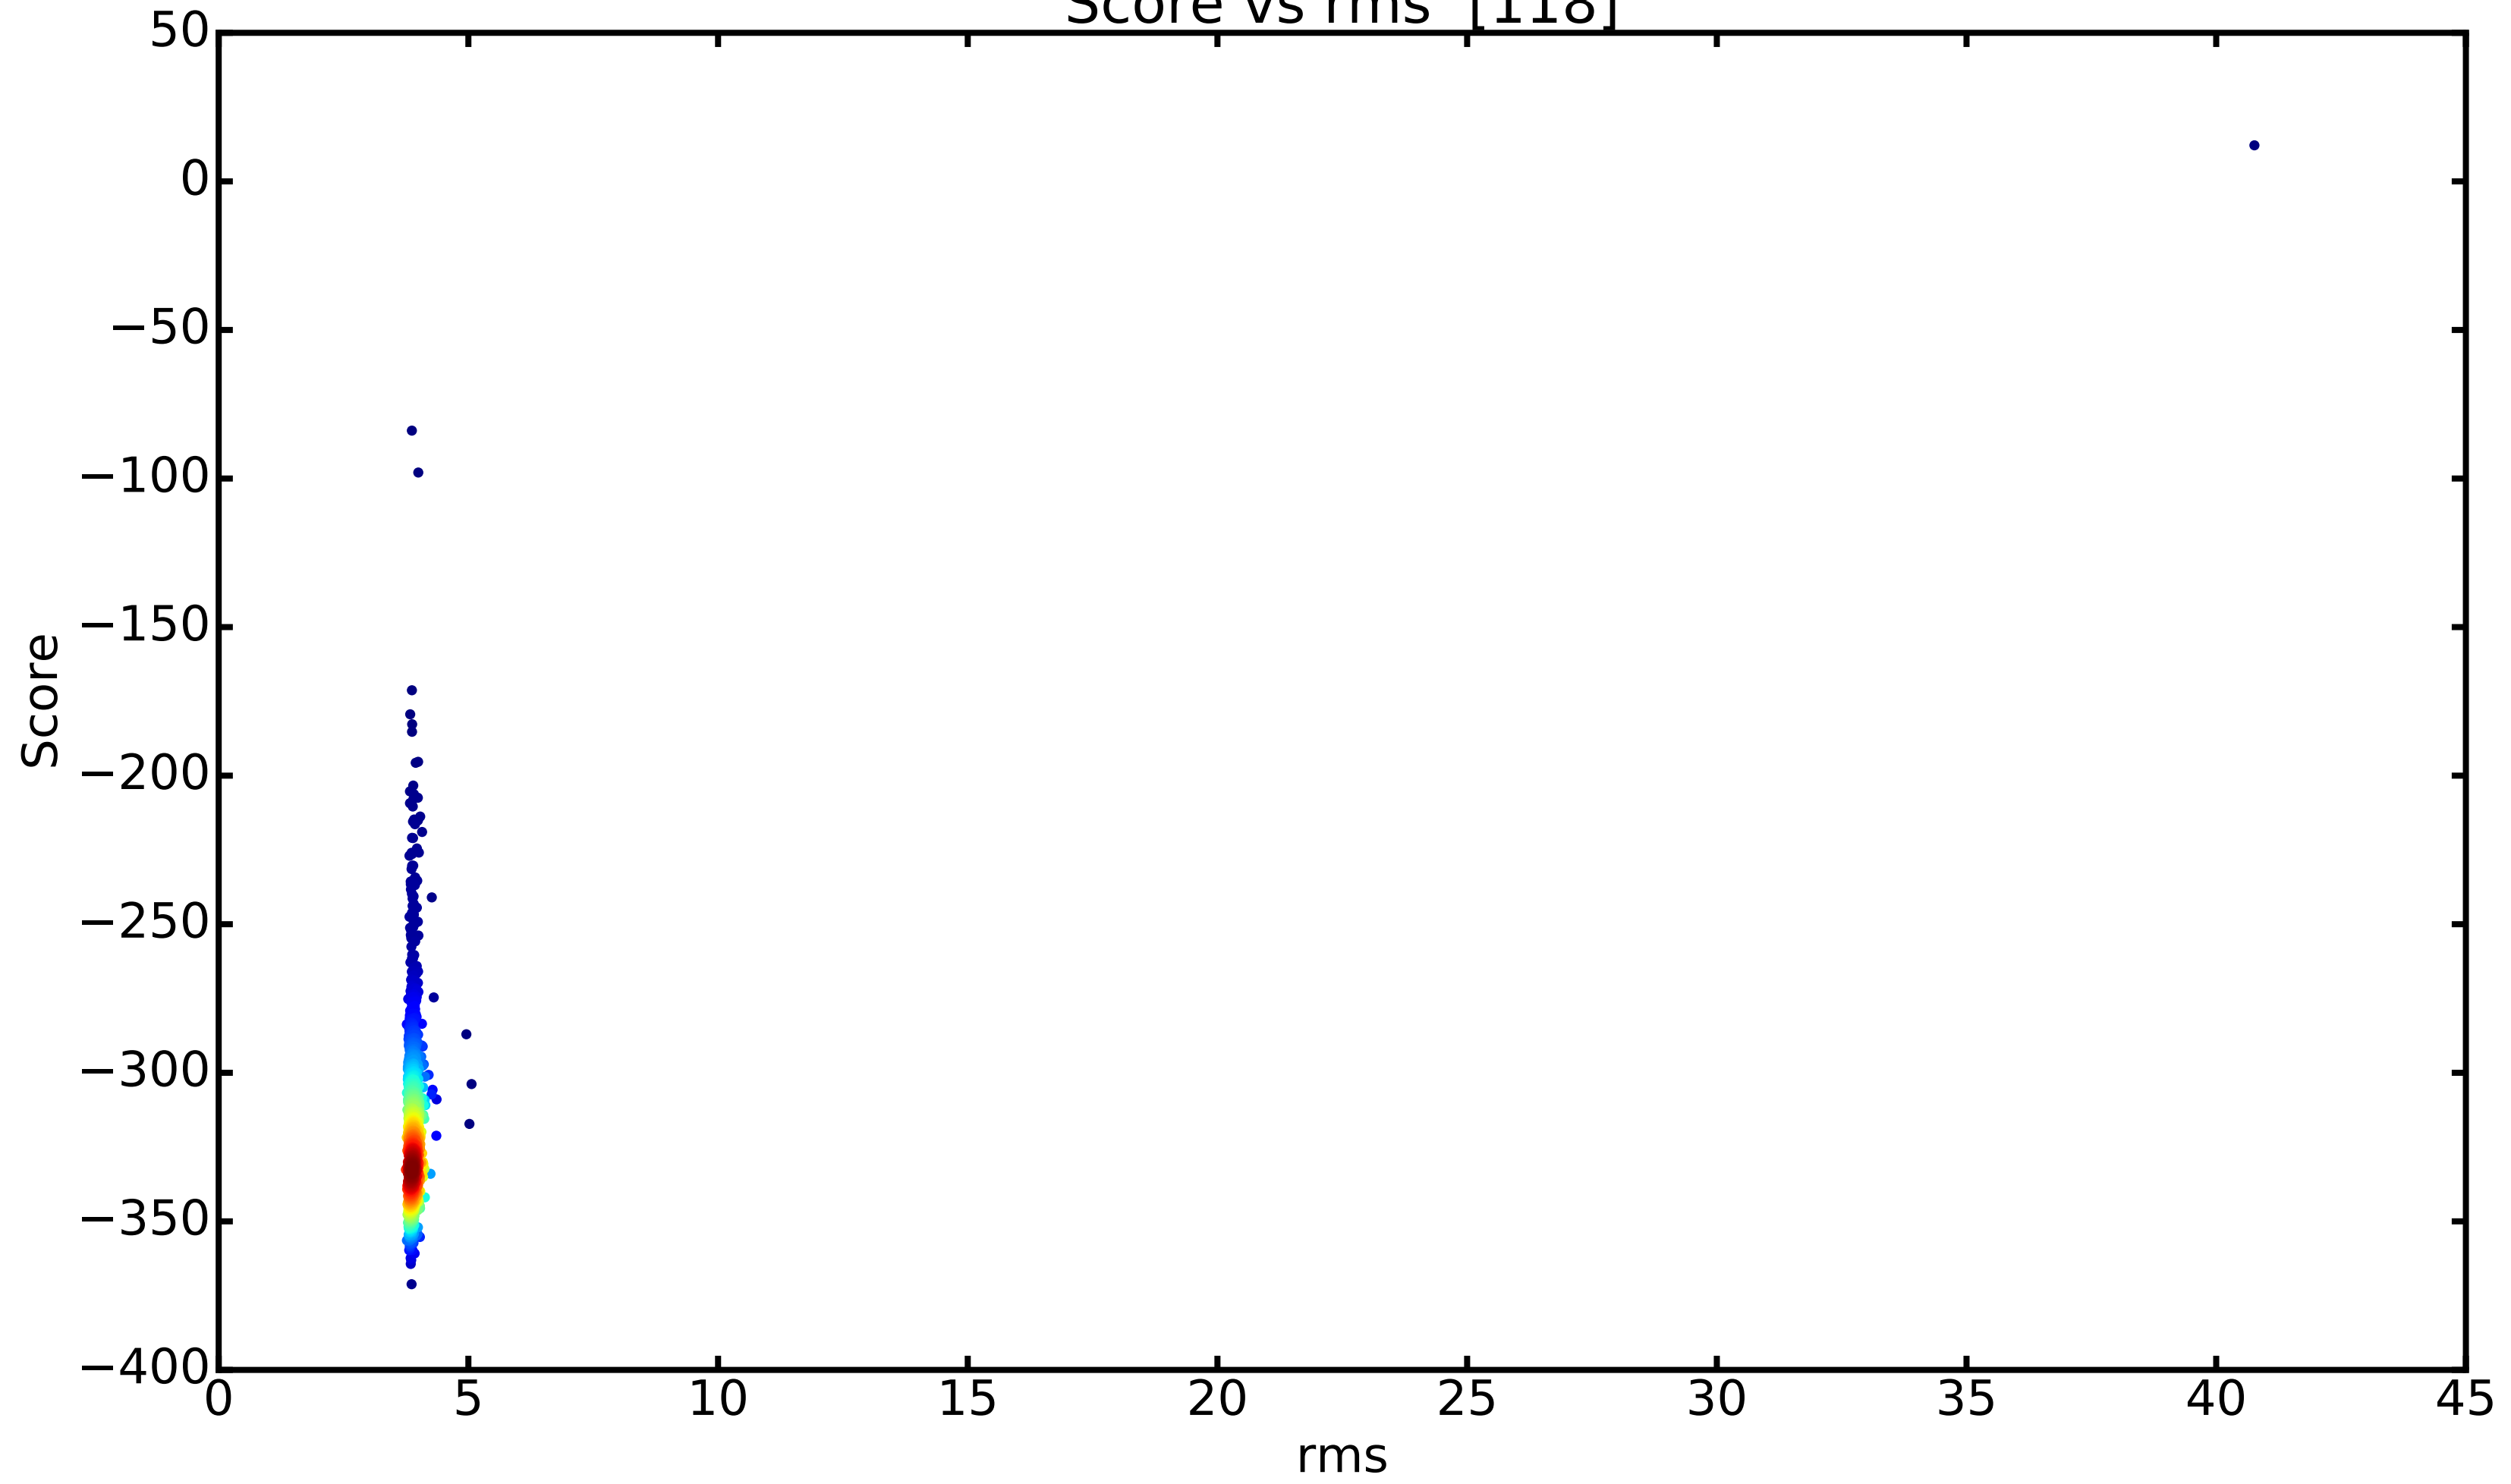

Score vs rms [118]

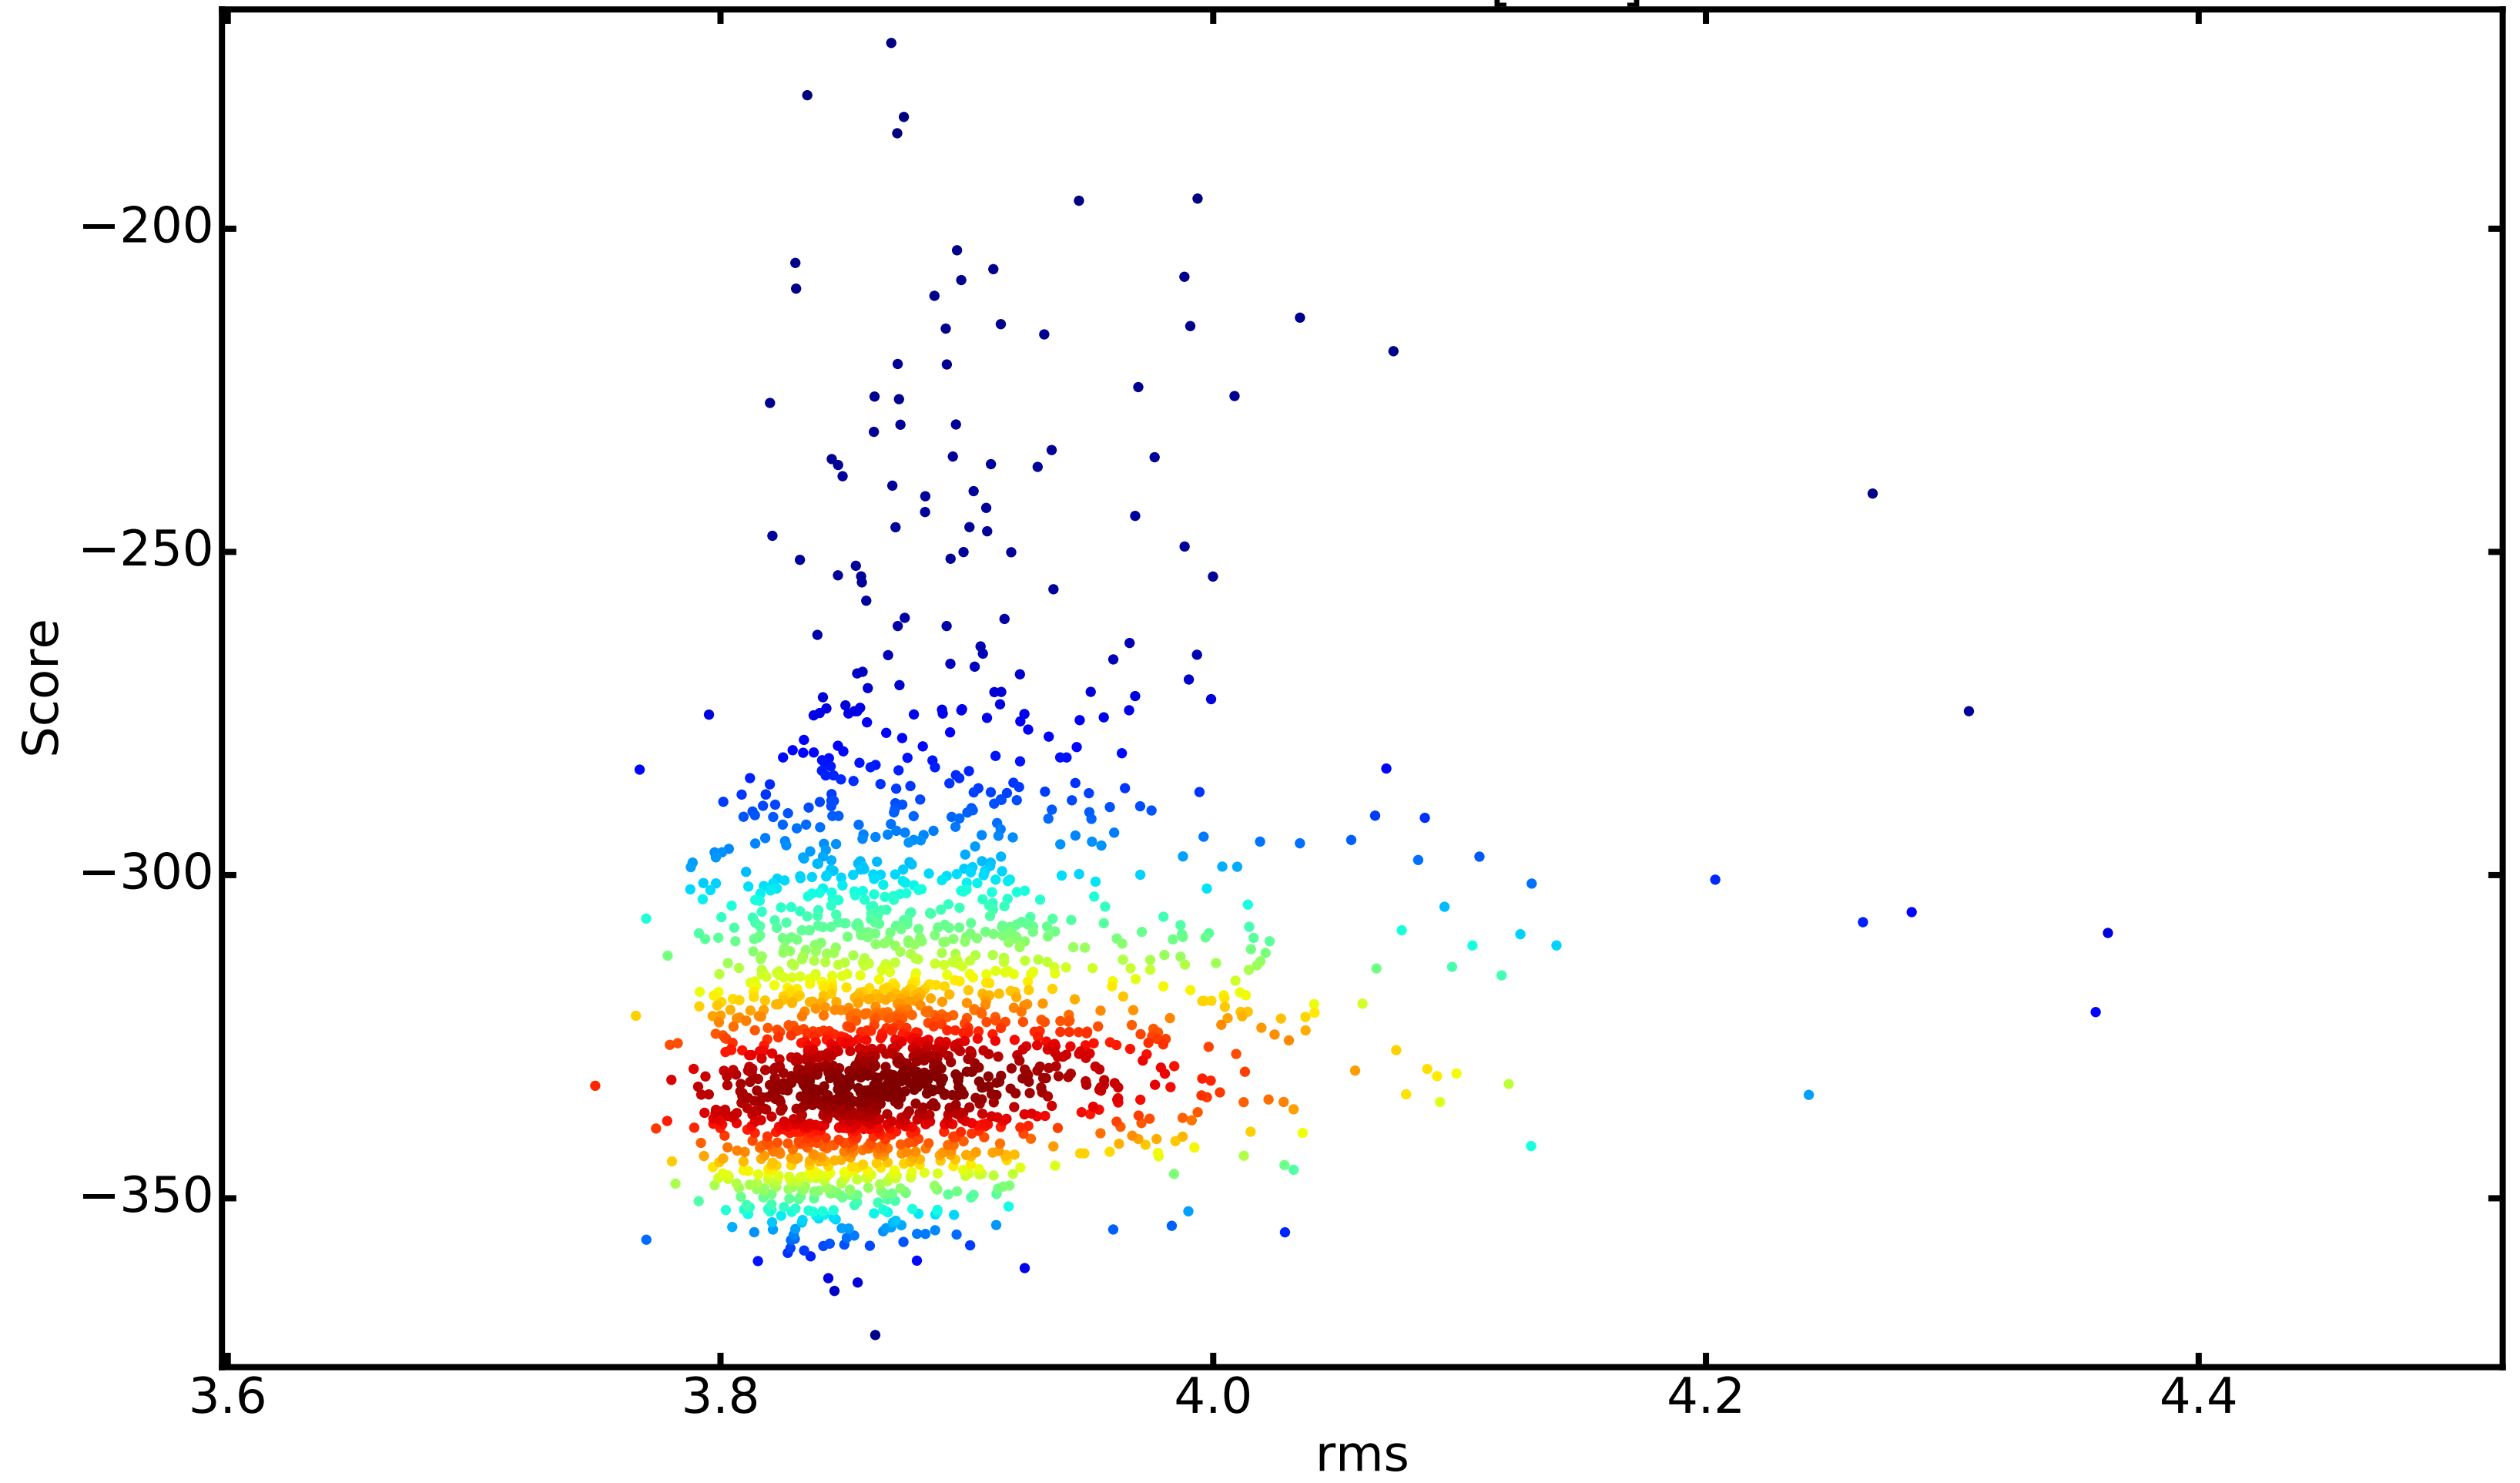

Score vs rms [121]

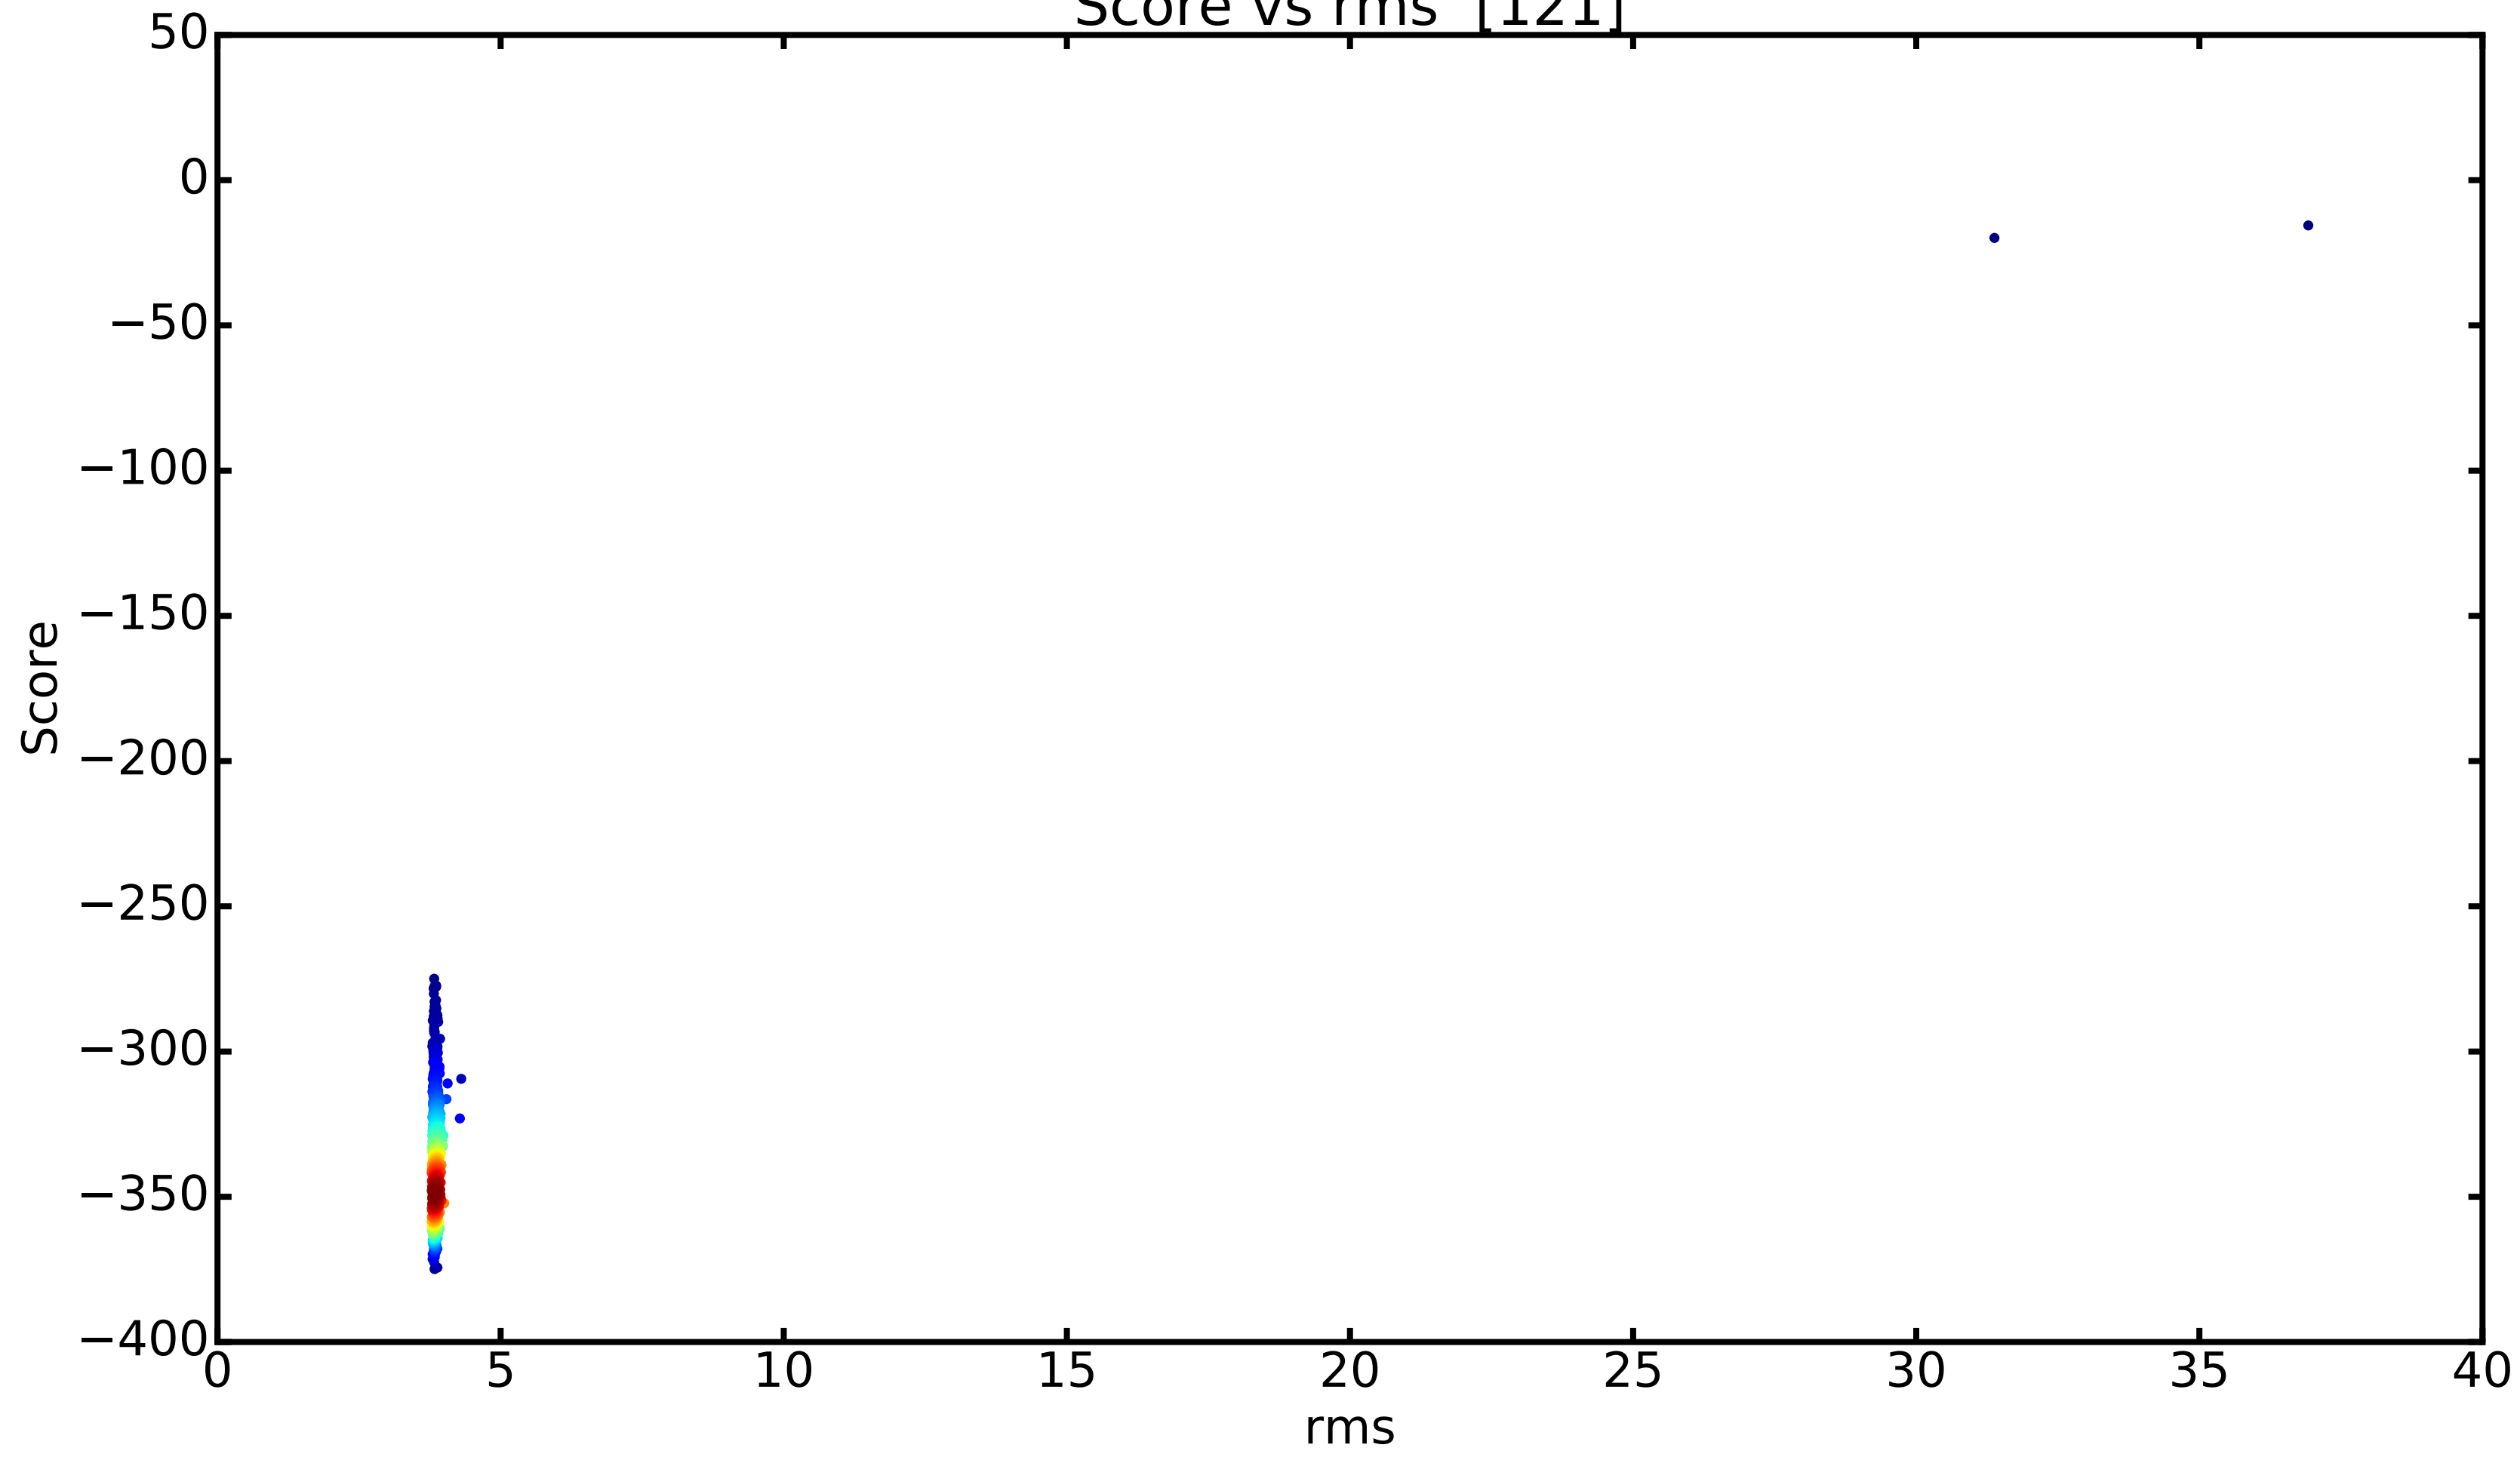

Score vs rms [121]

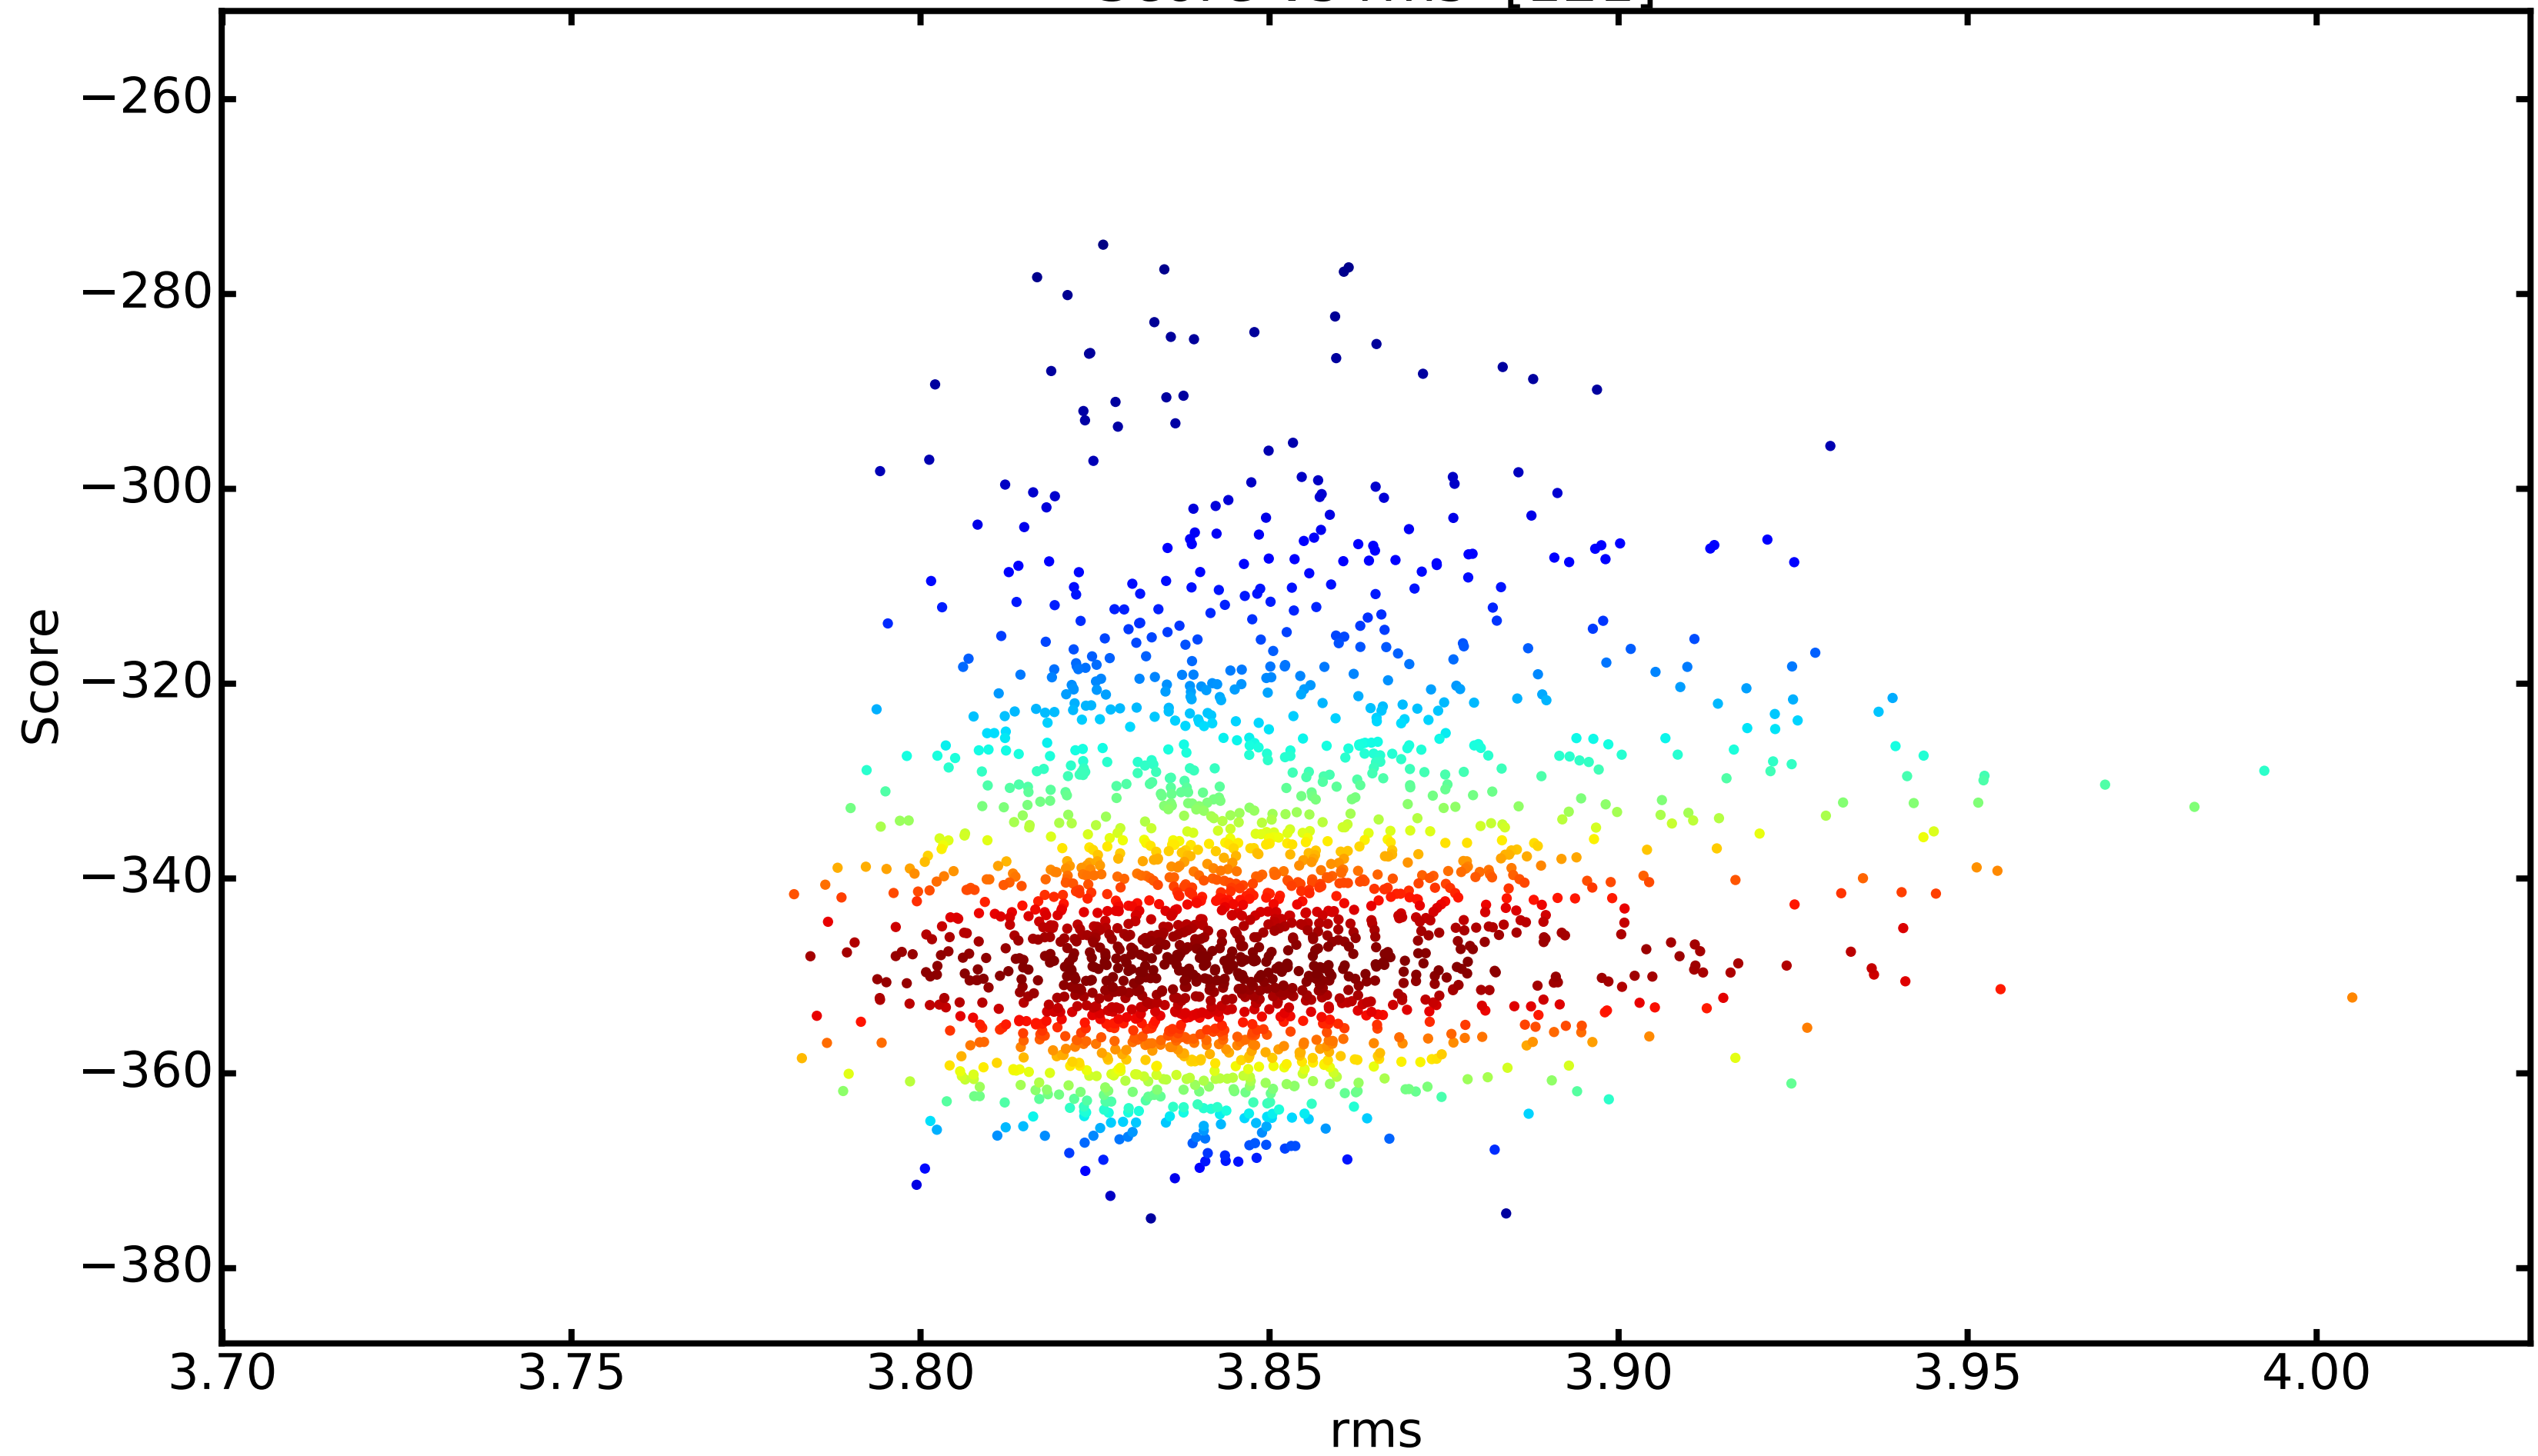

Score vs rms [122]

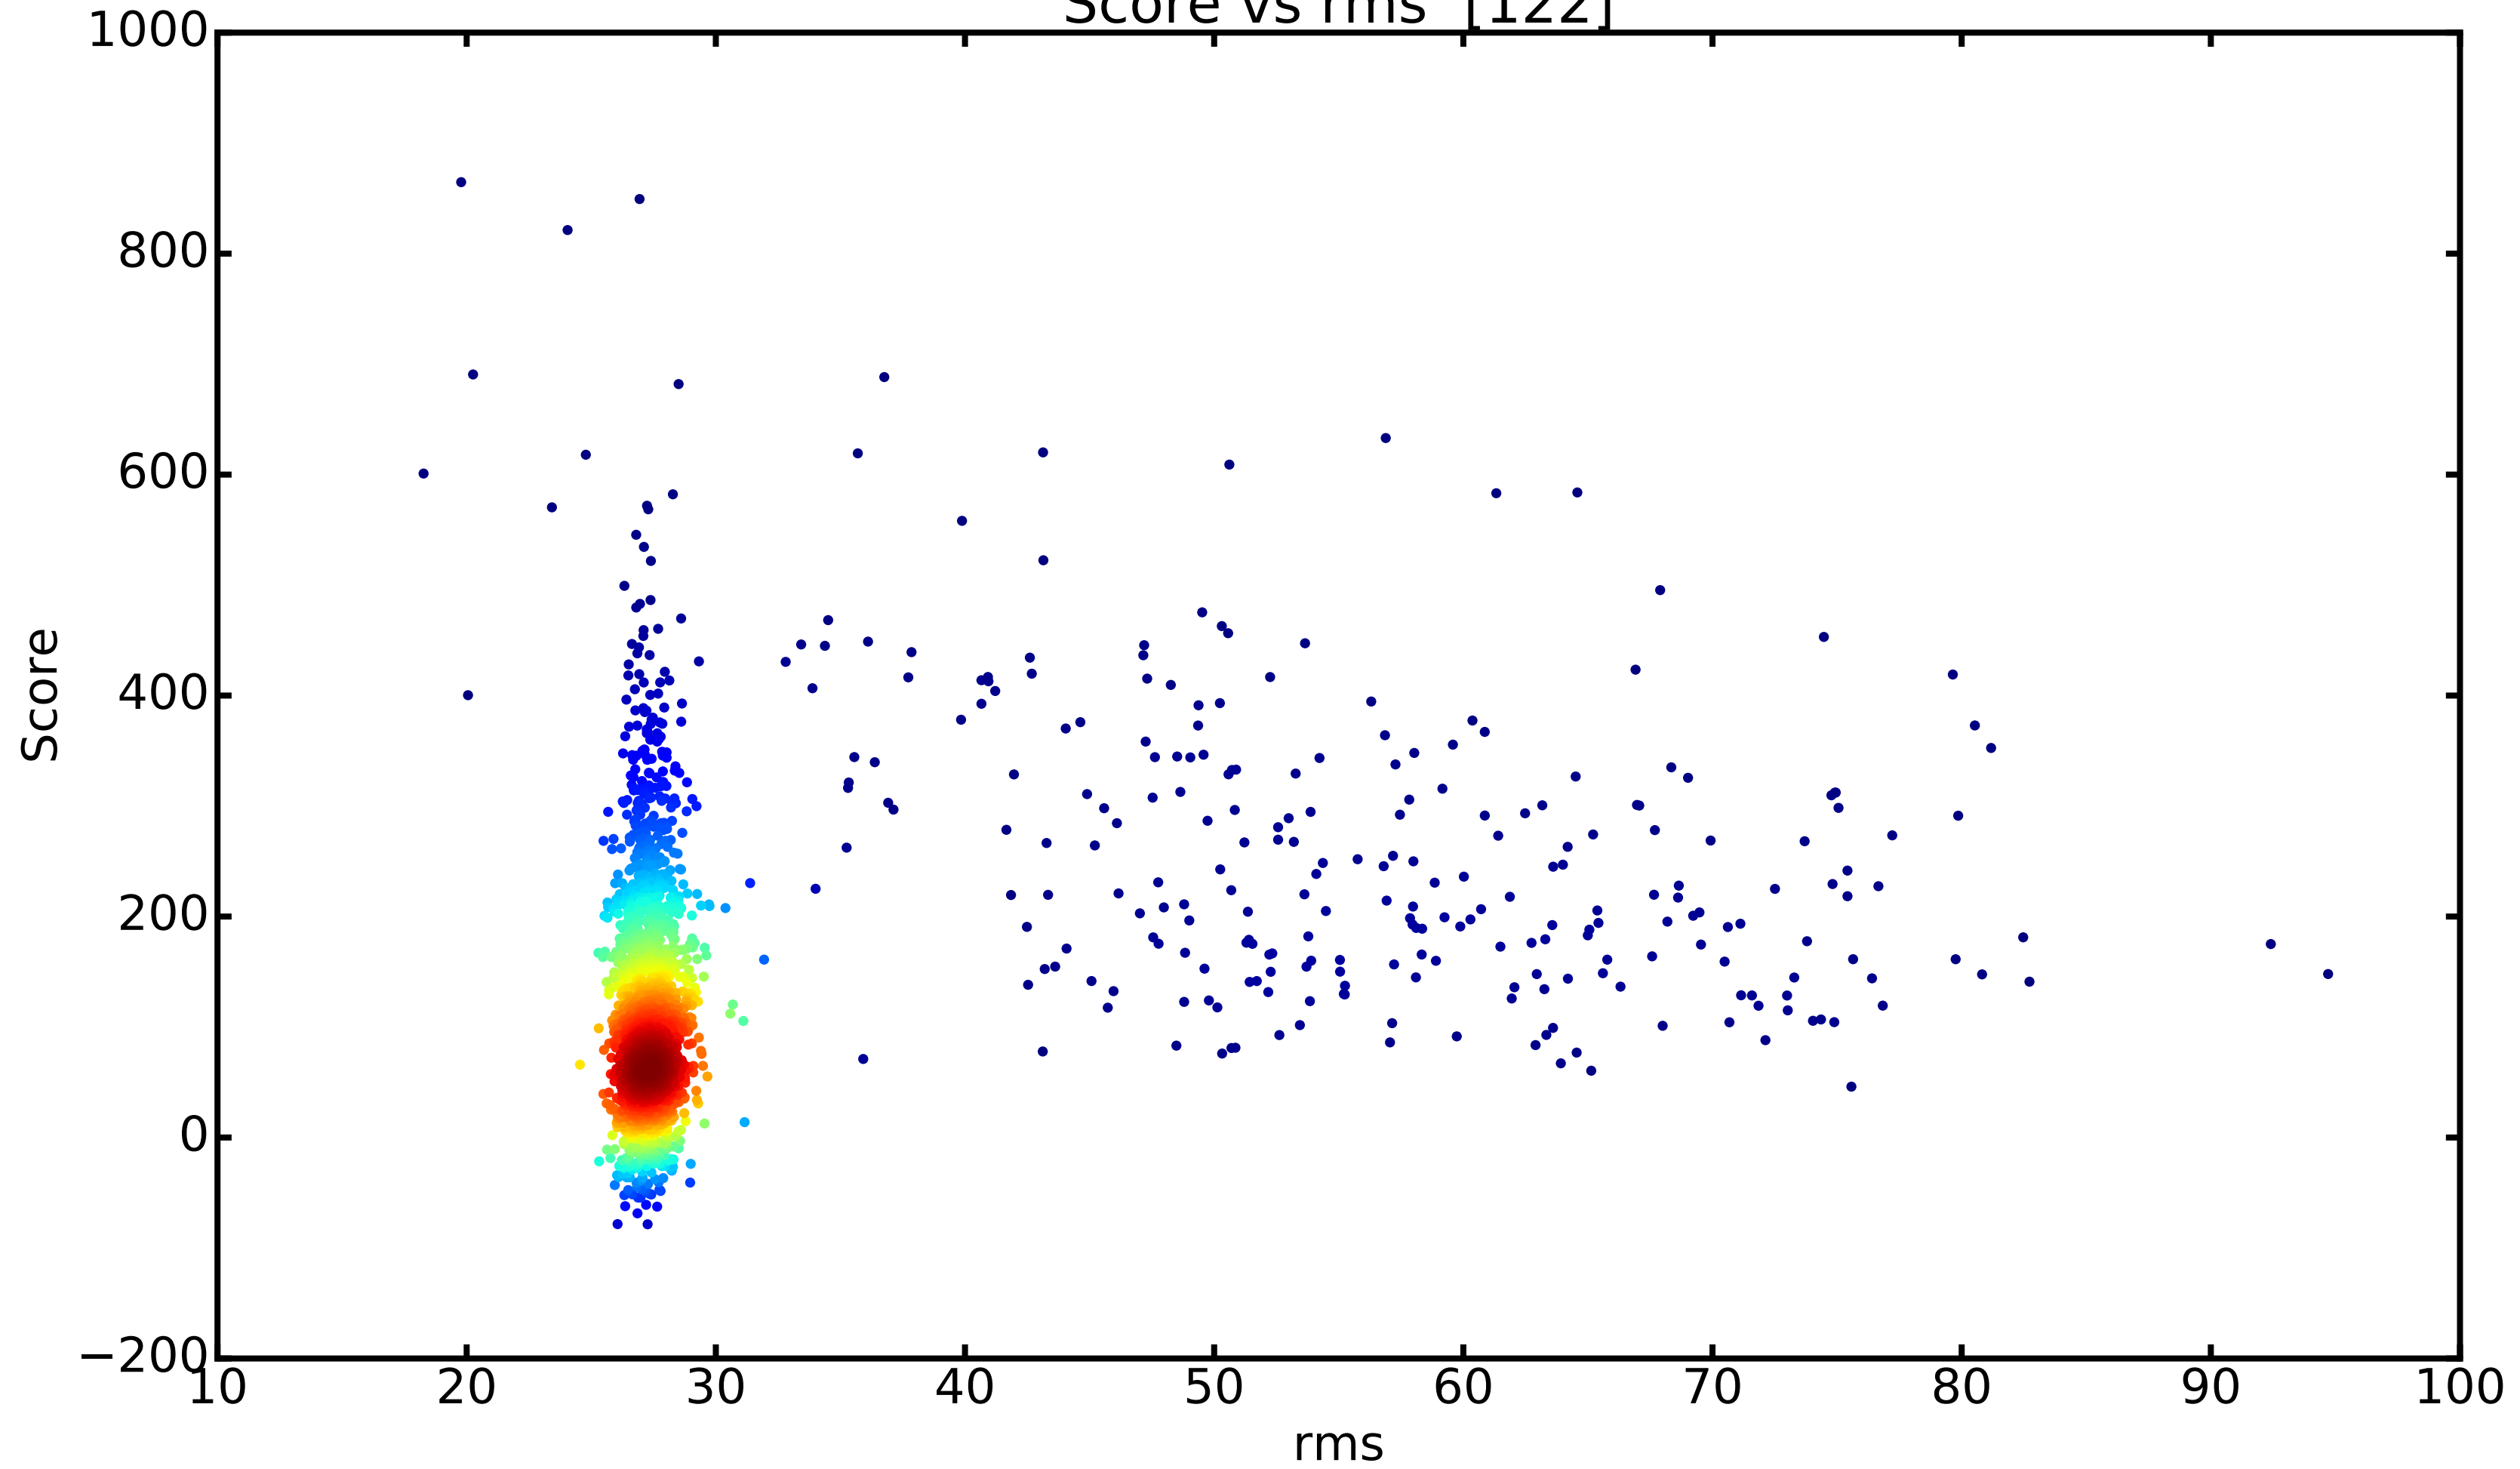



Score vs rms [122]

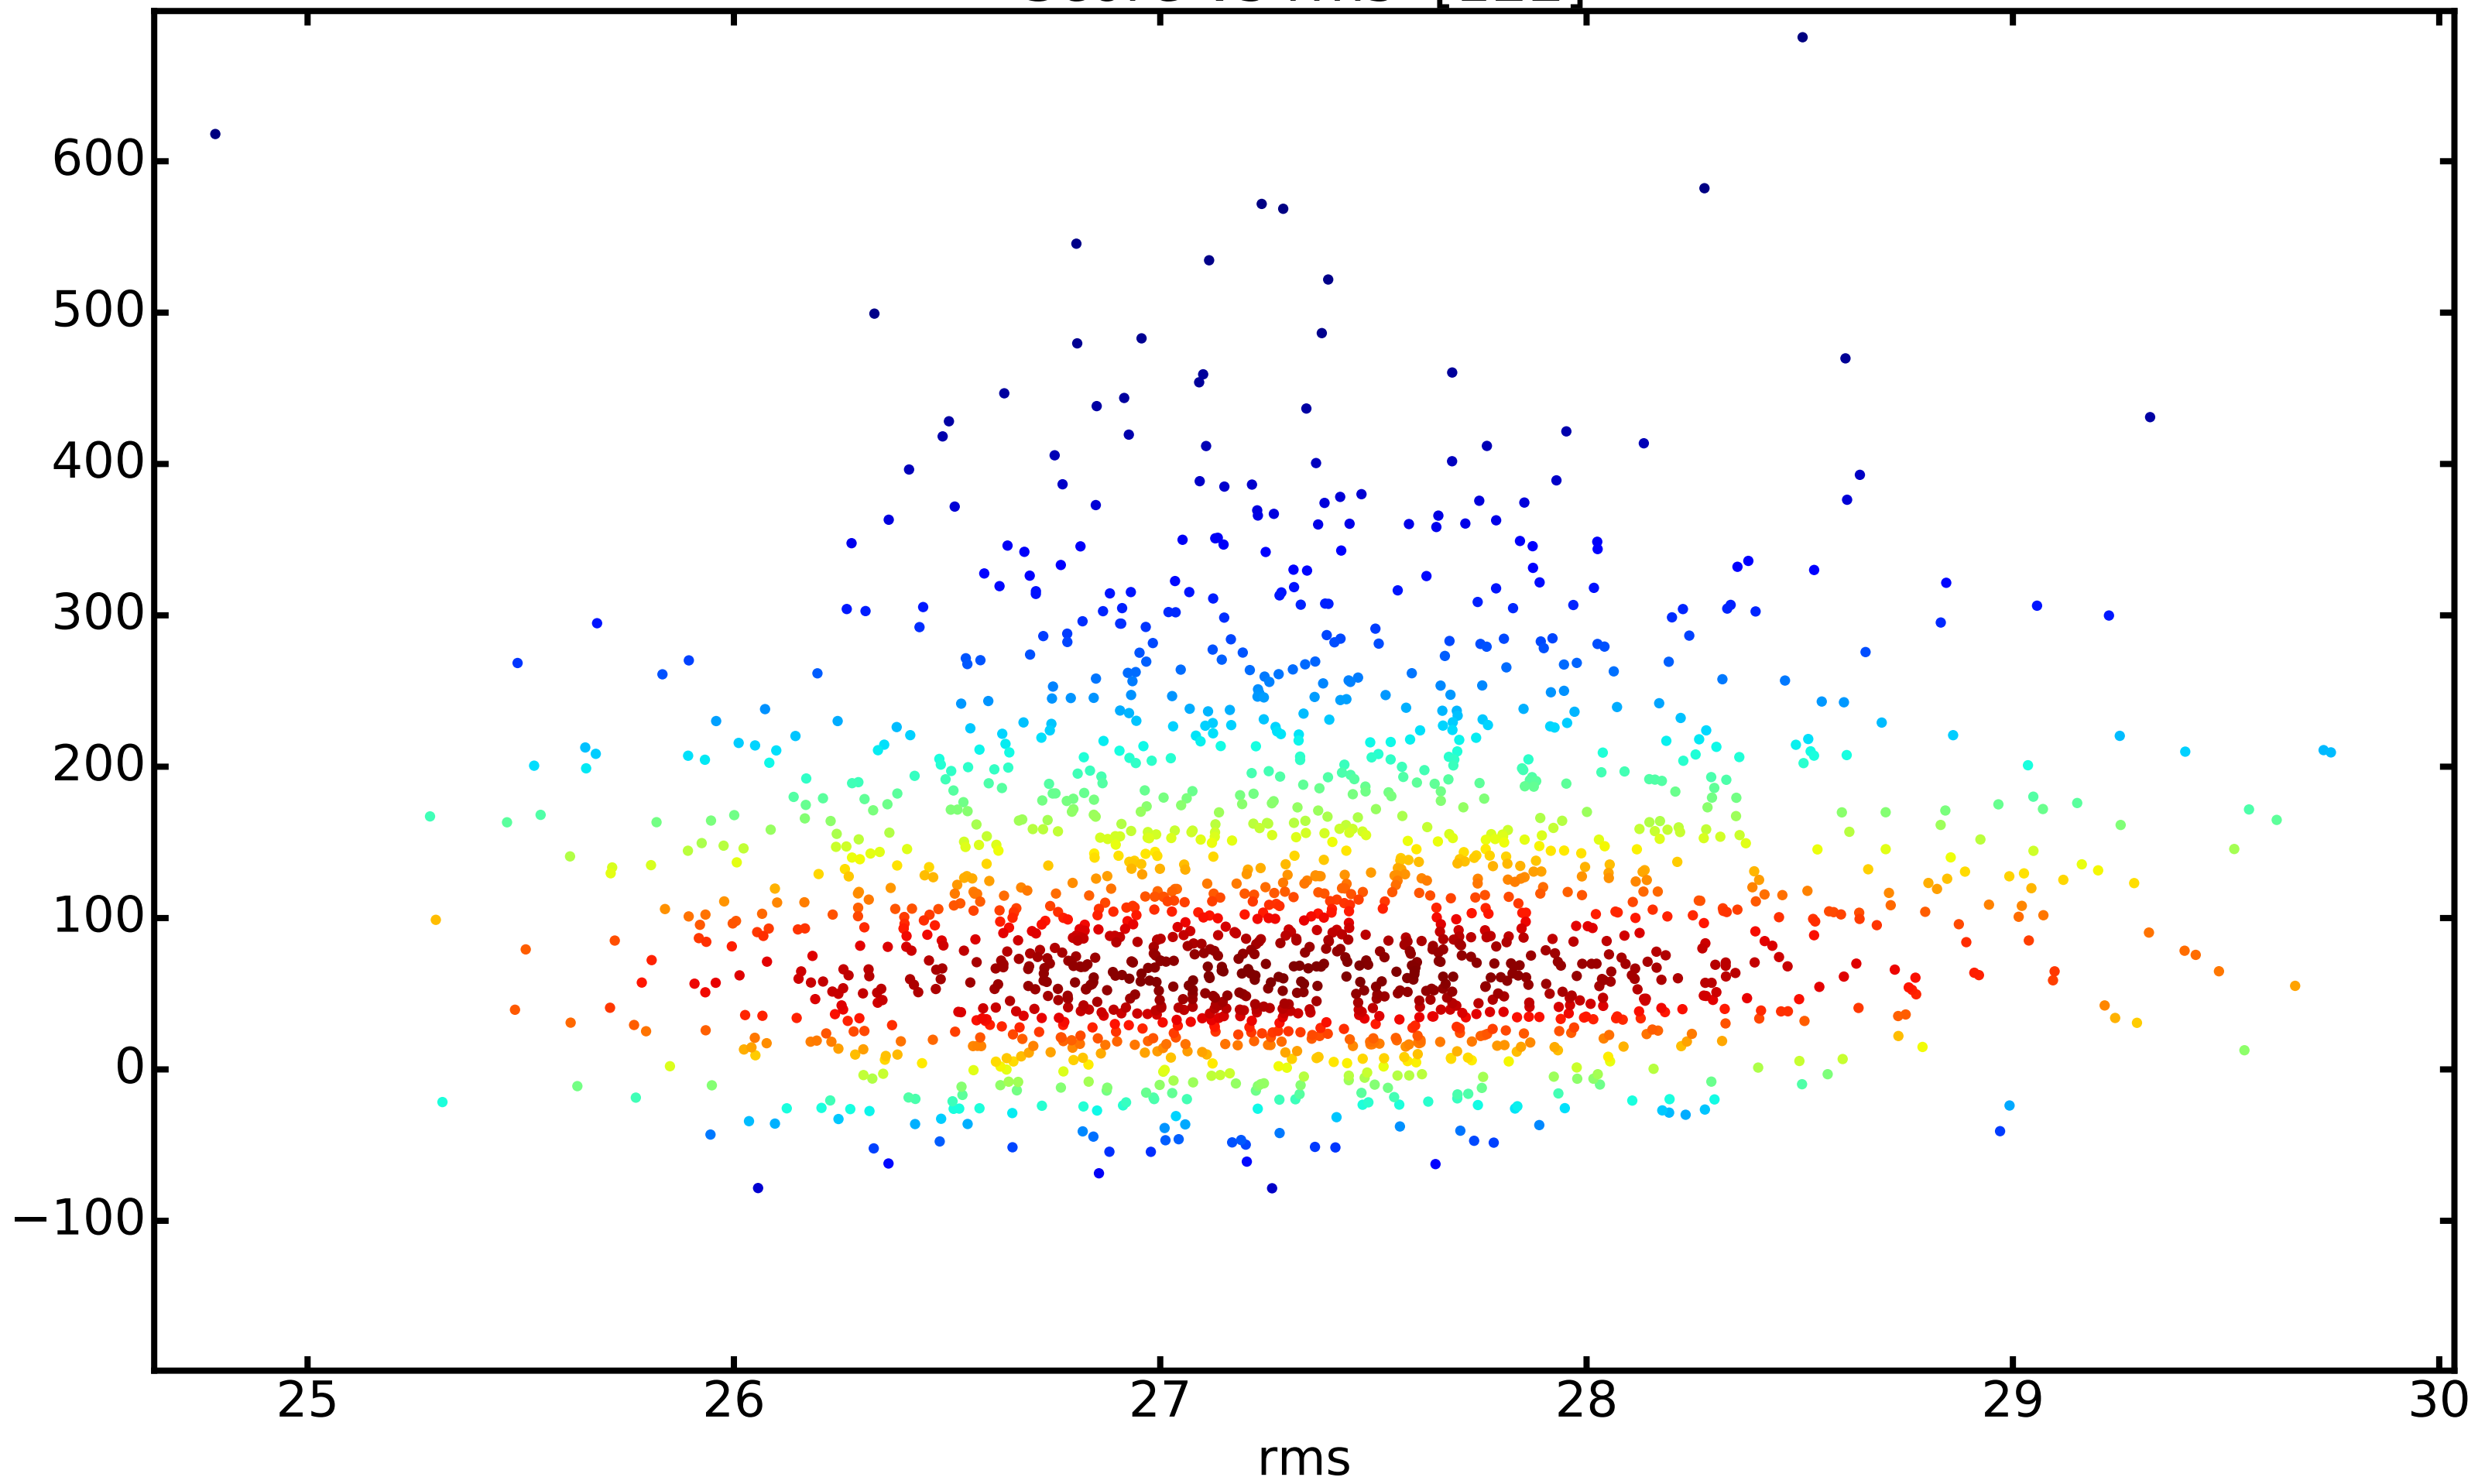

Score vs rms [124]

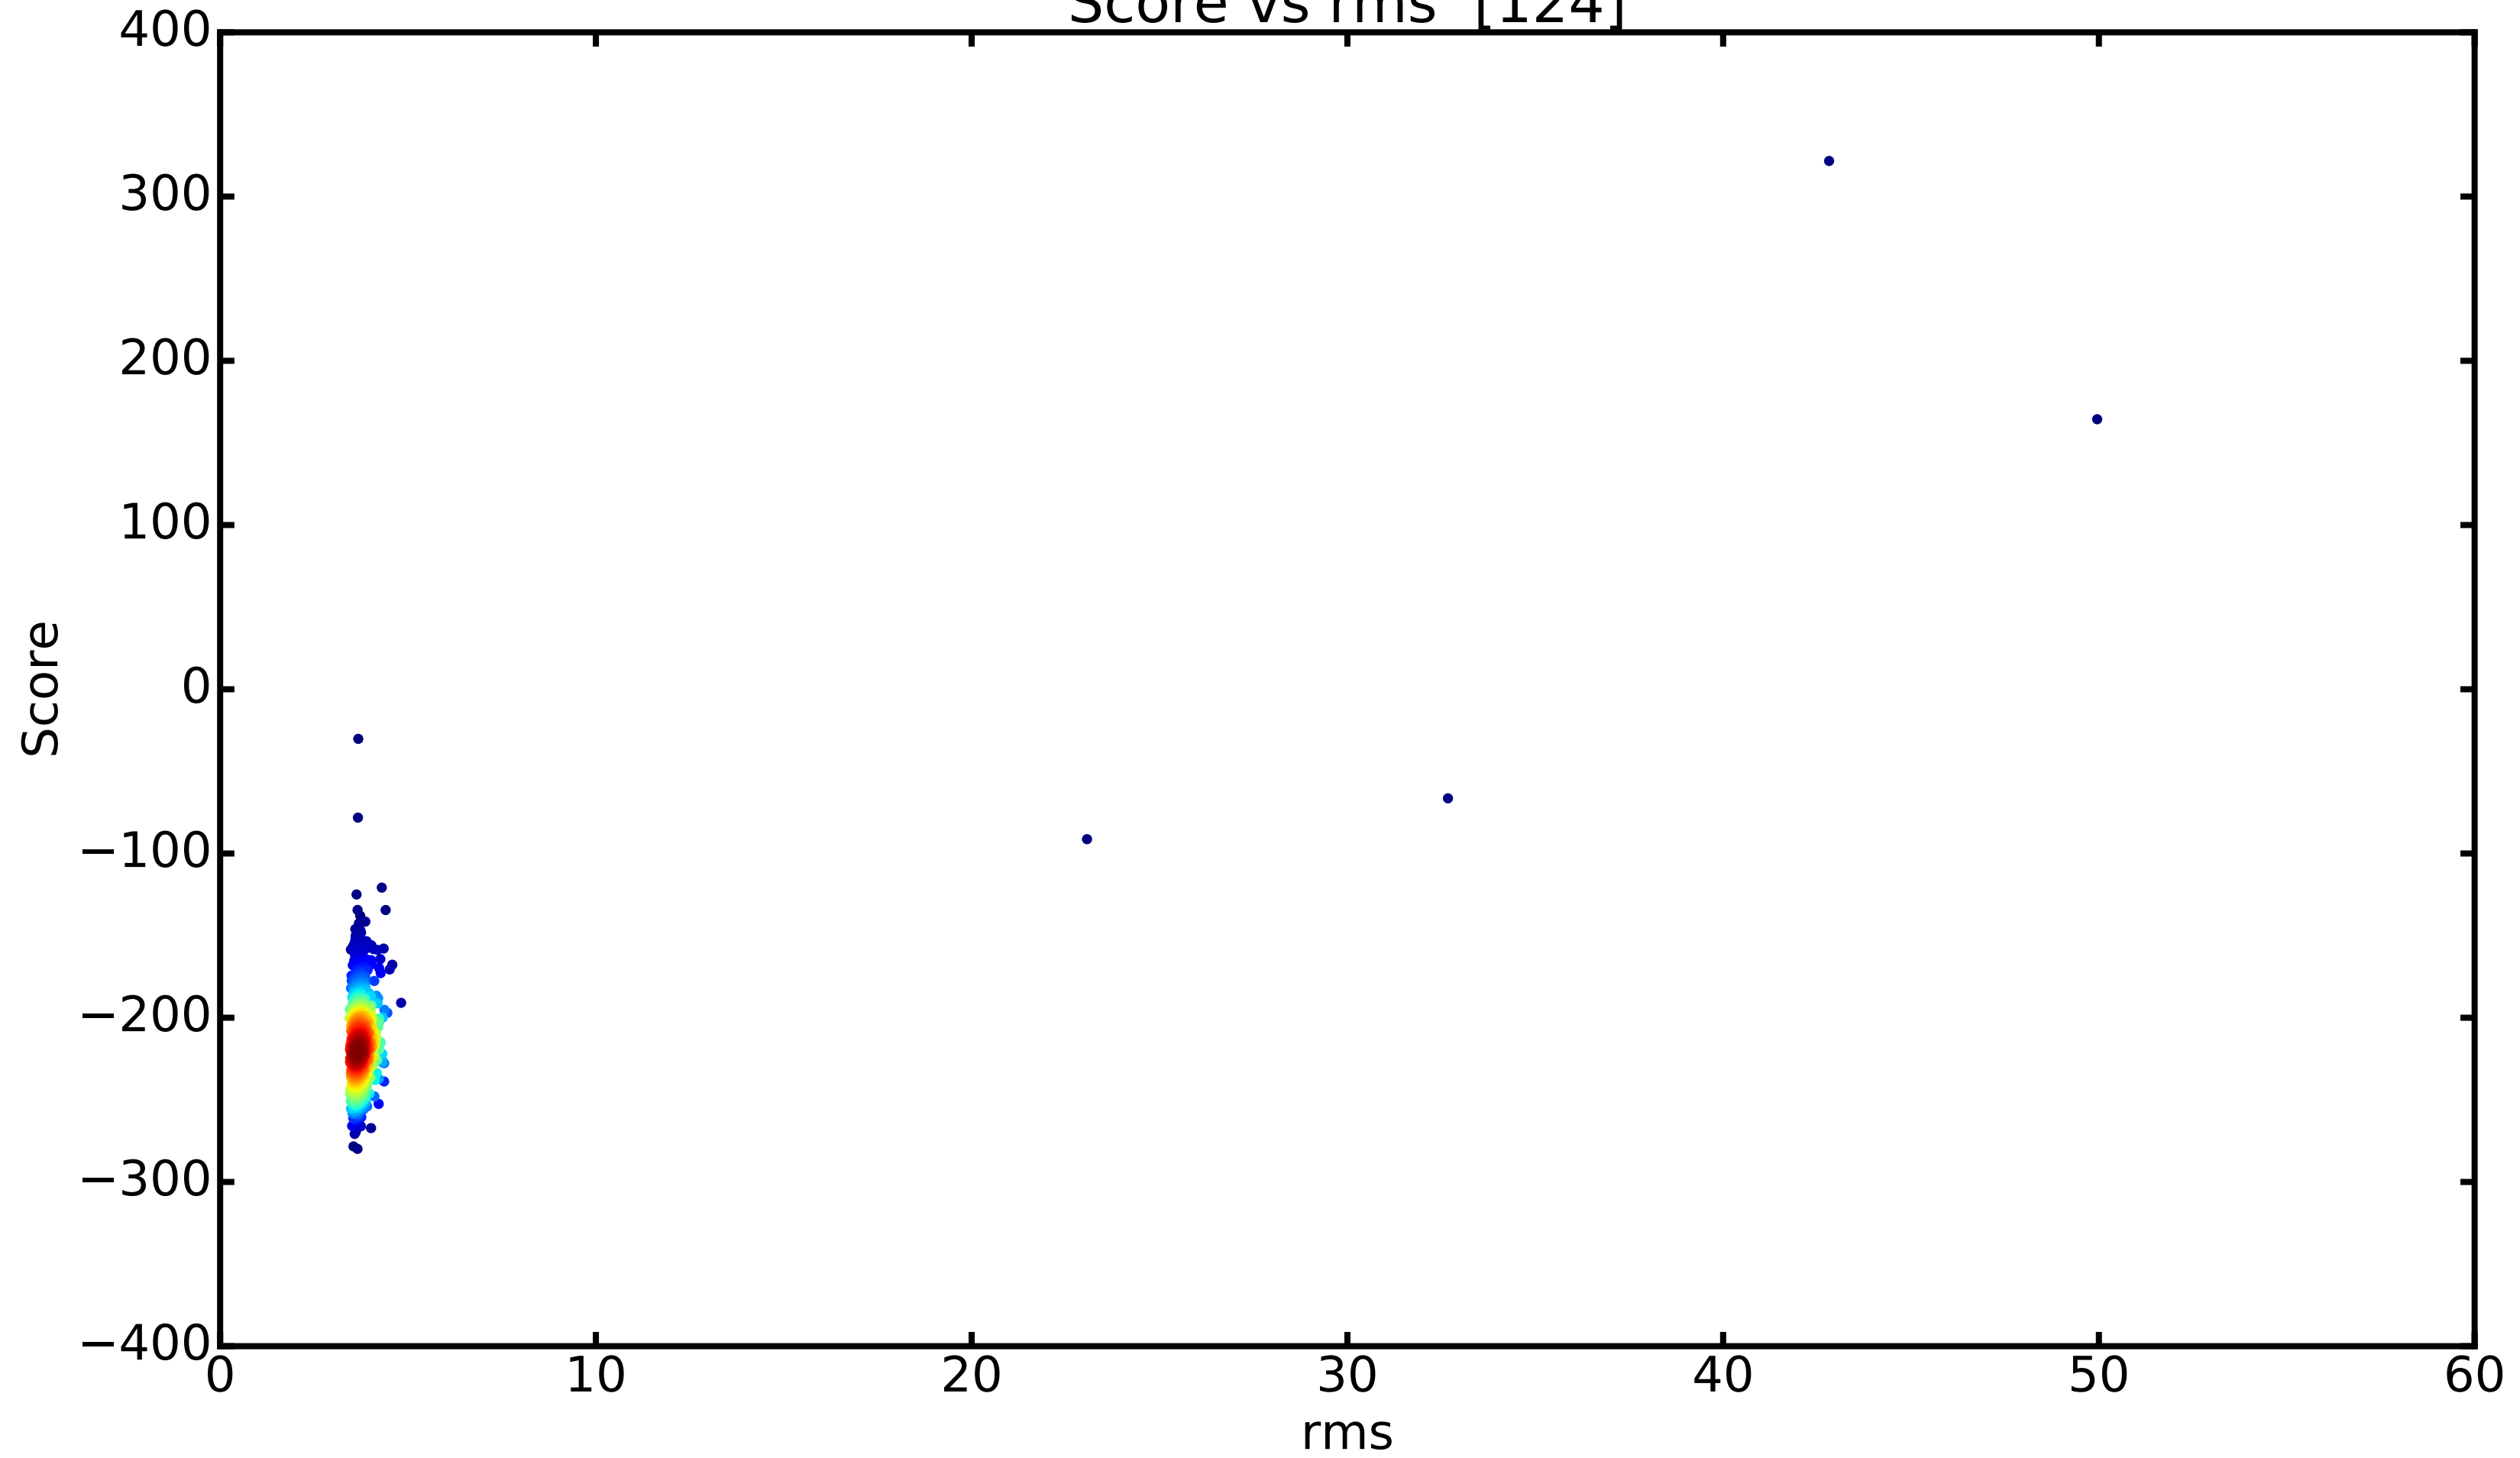

Score vs rms [124]

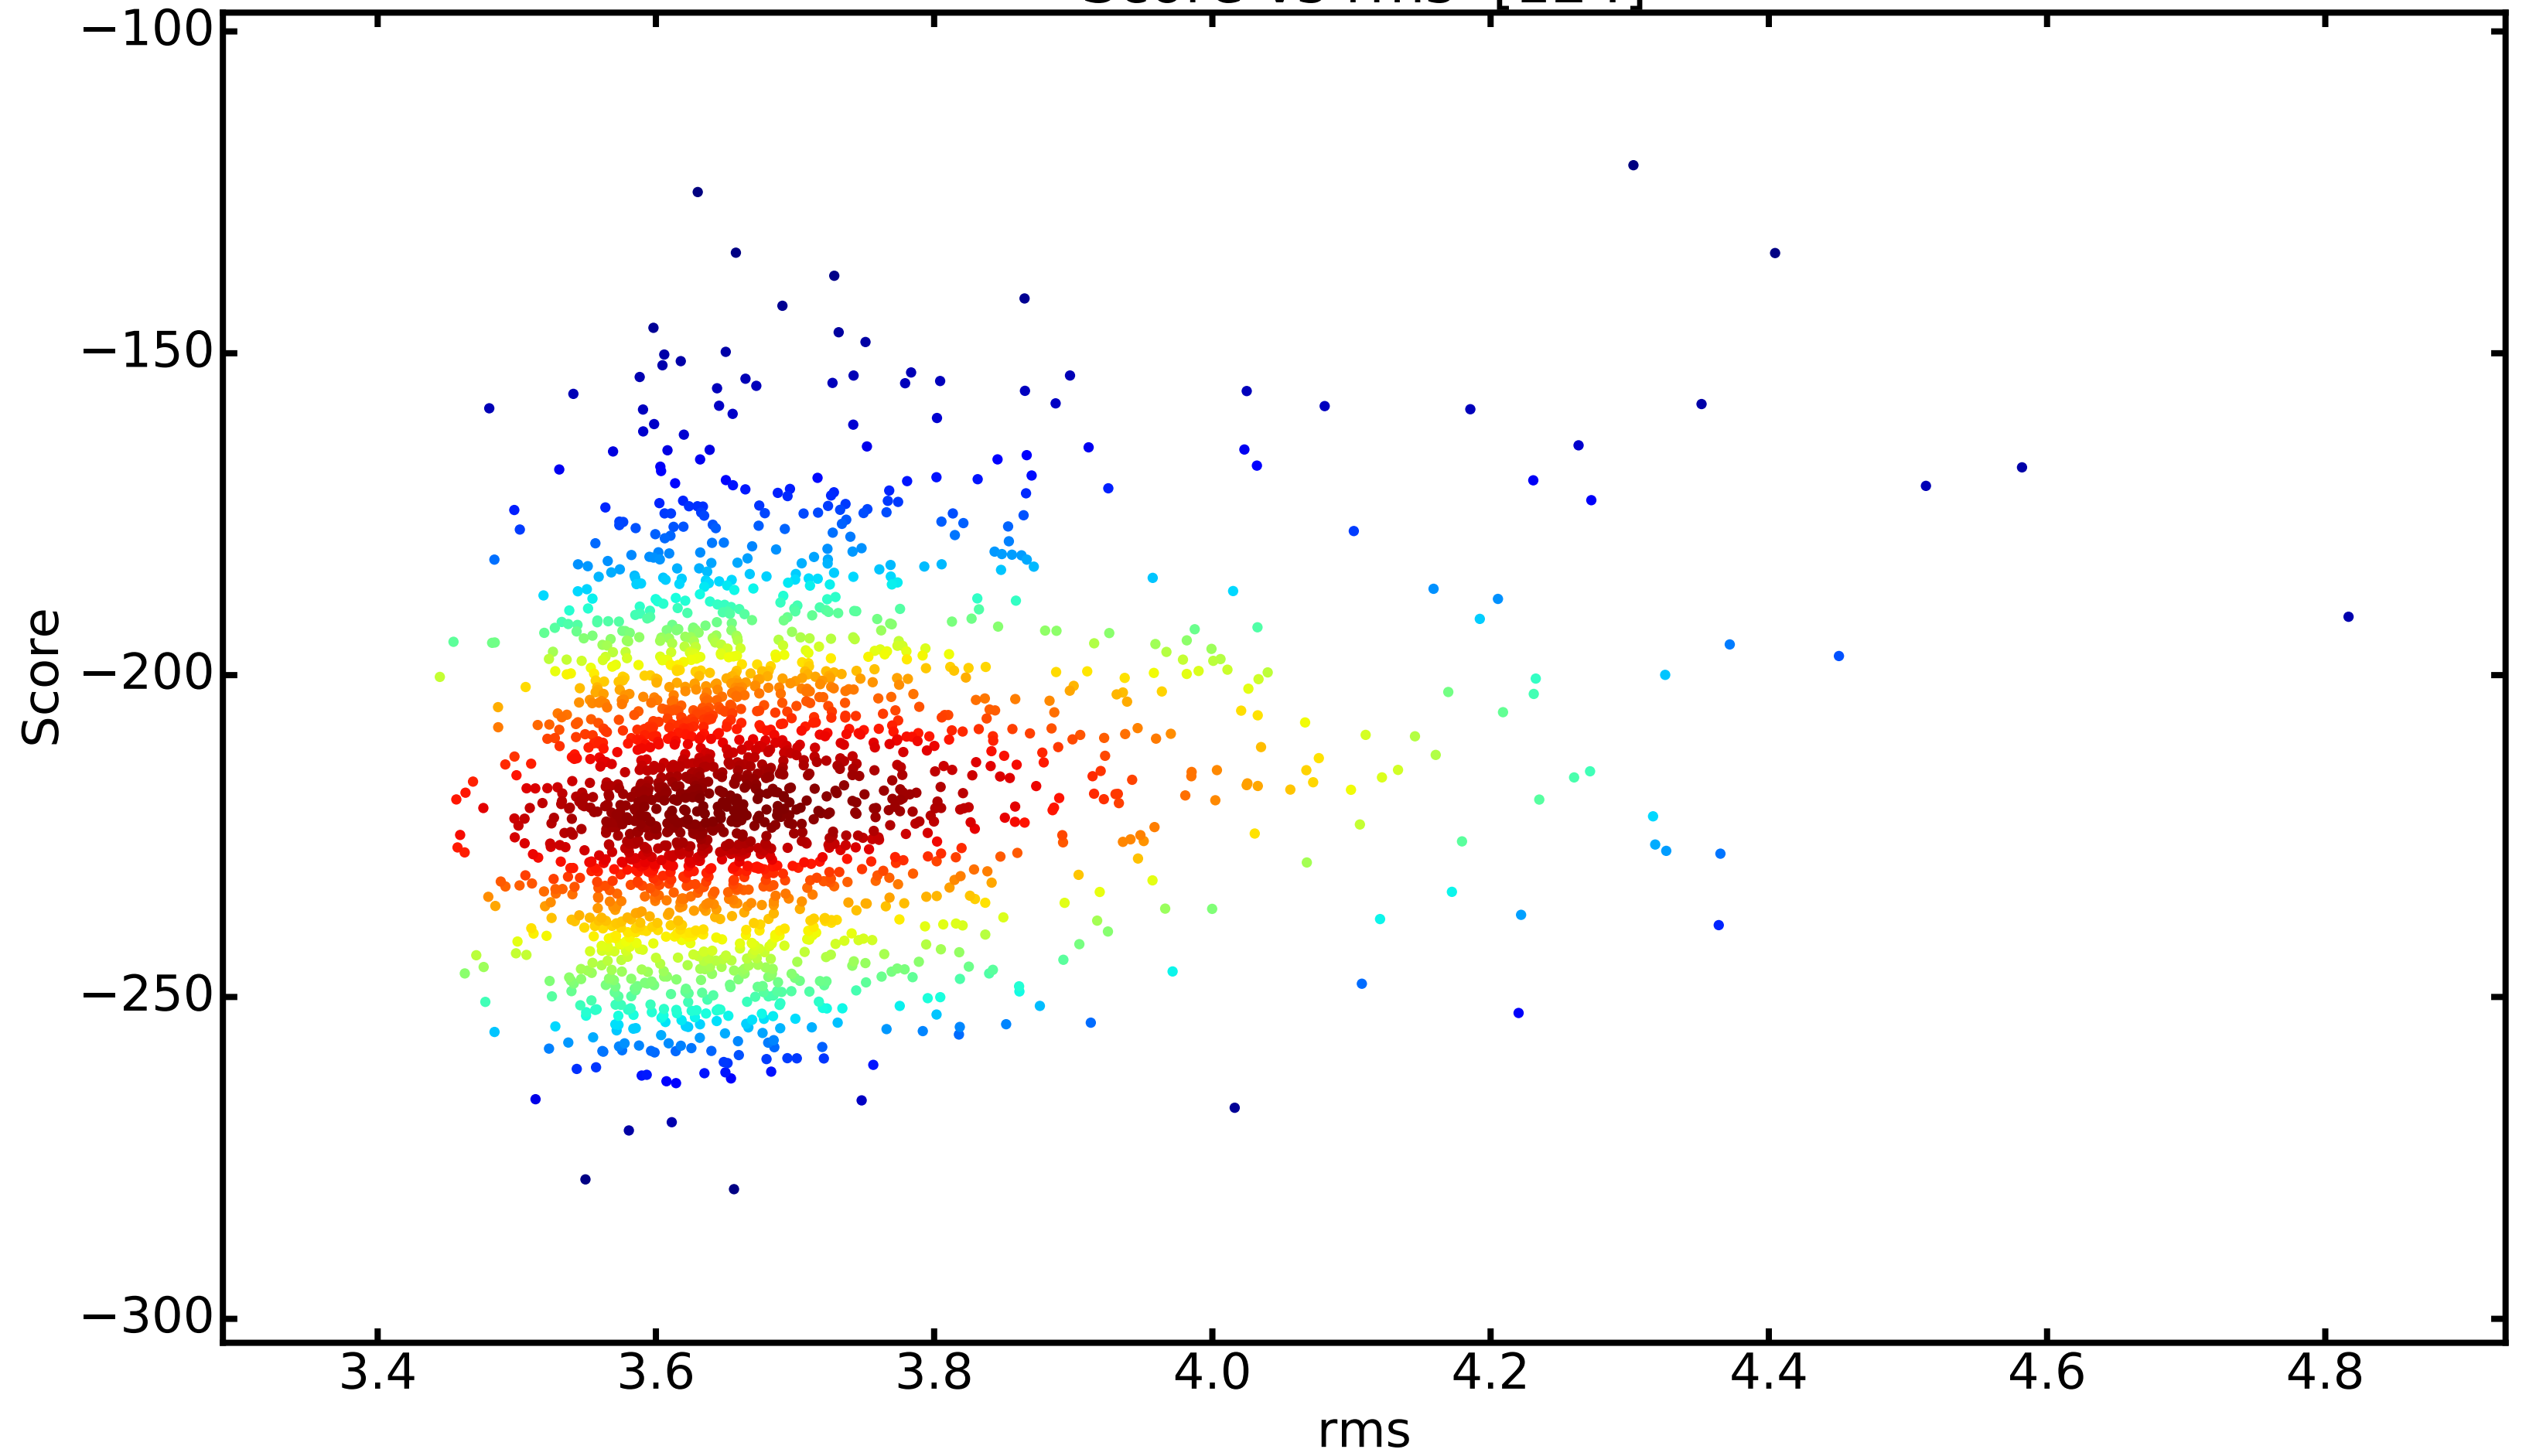

Score vs rms [147]

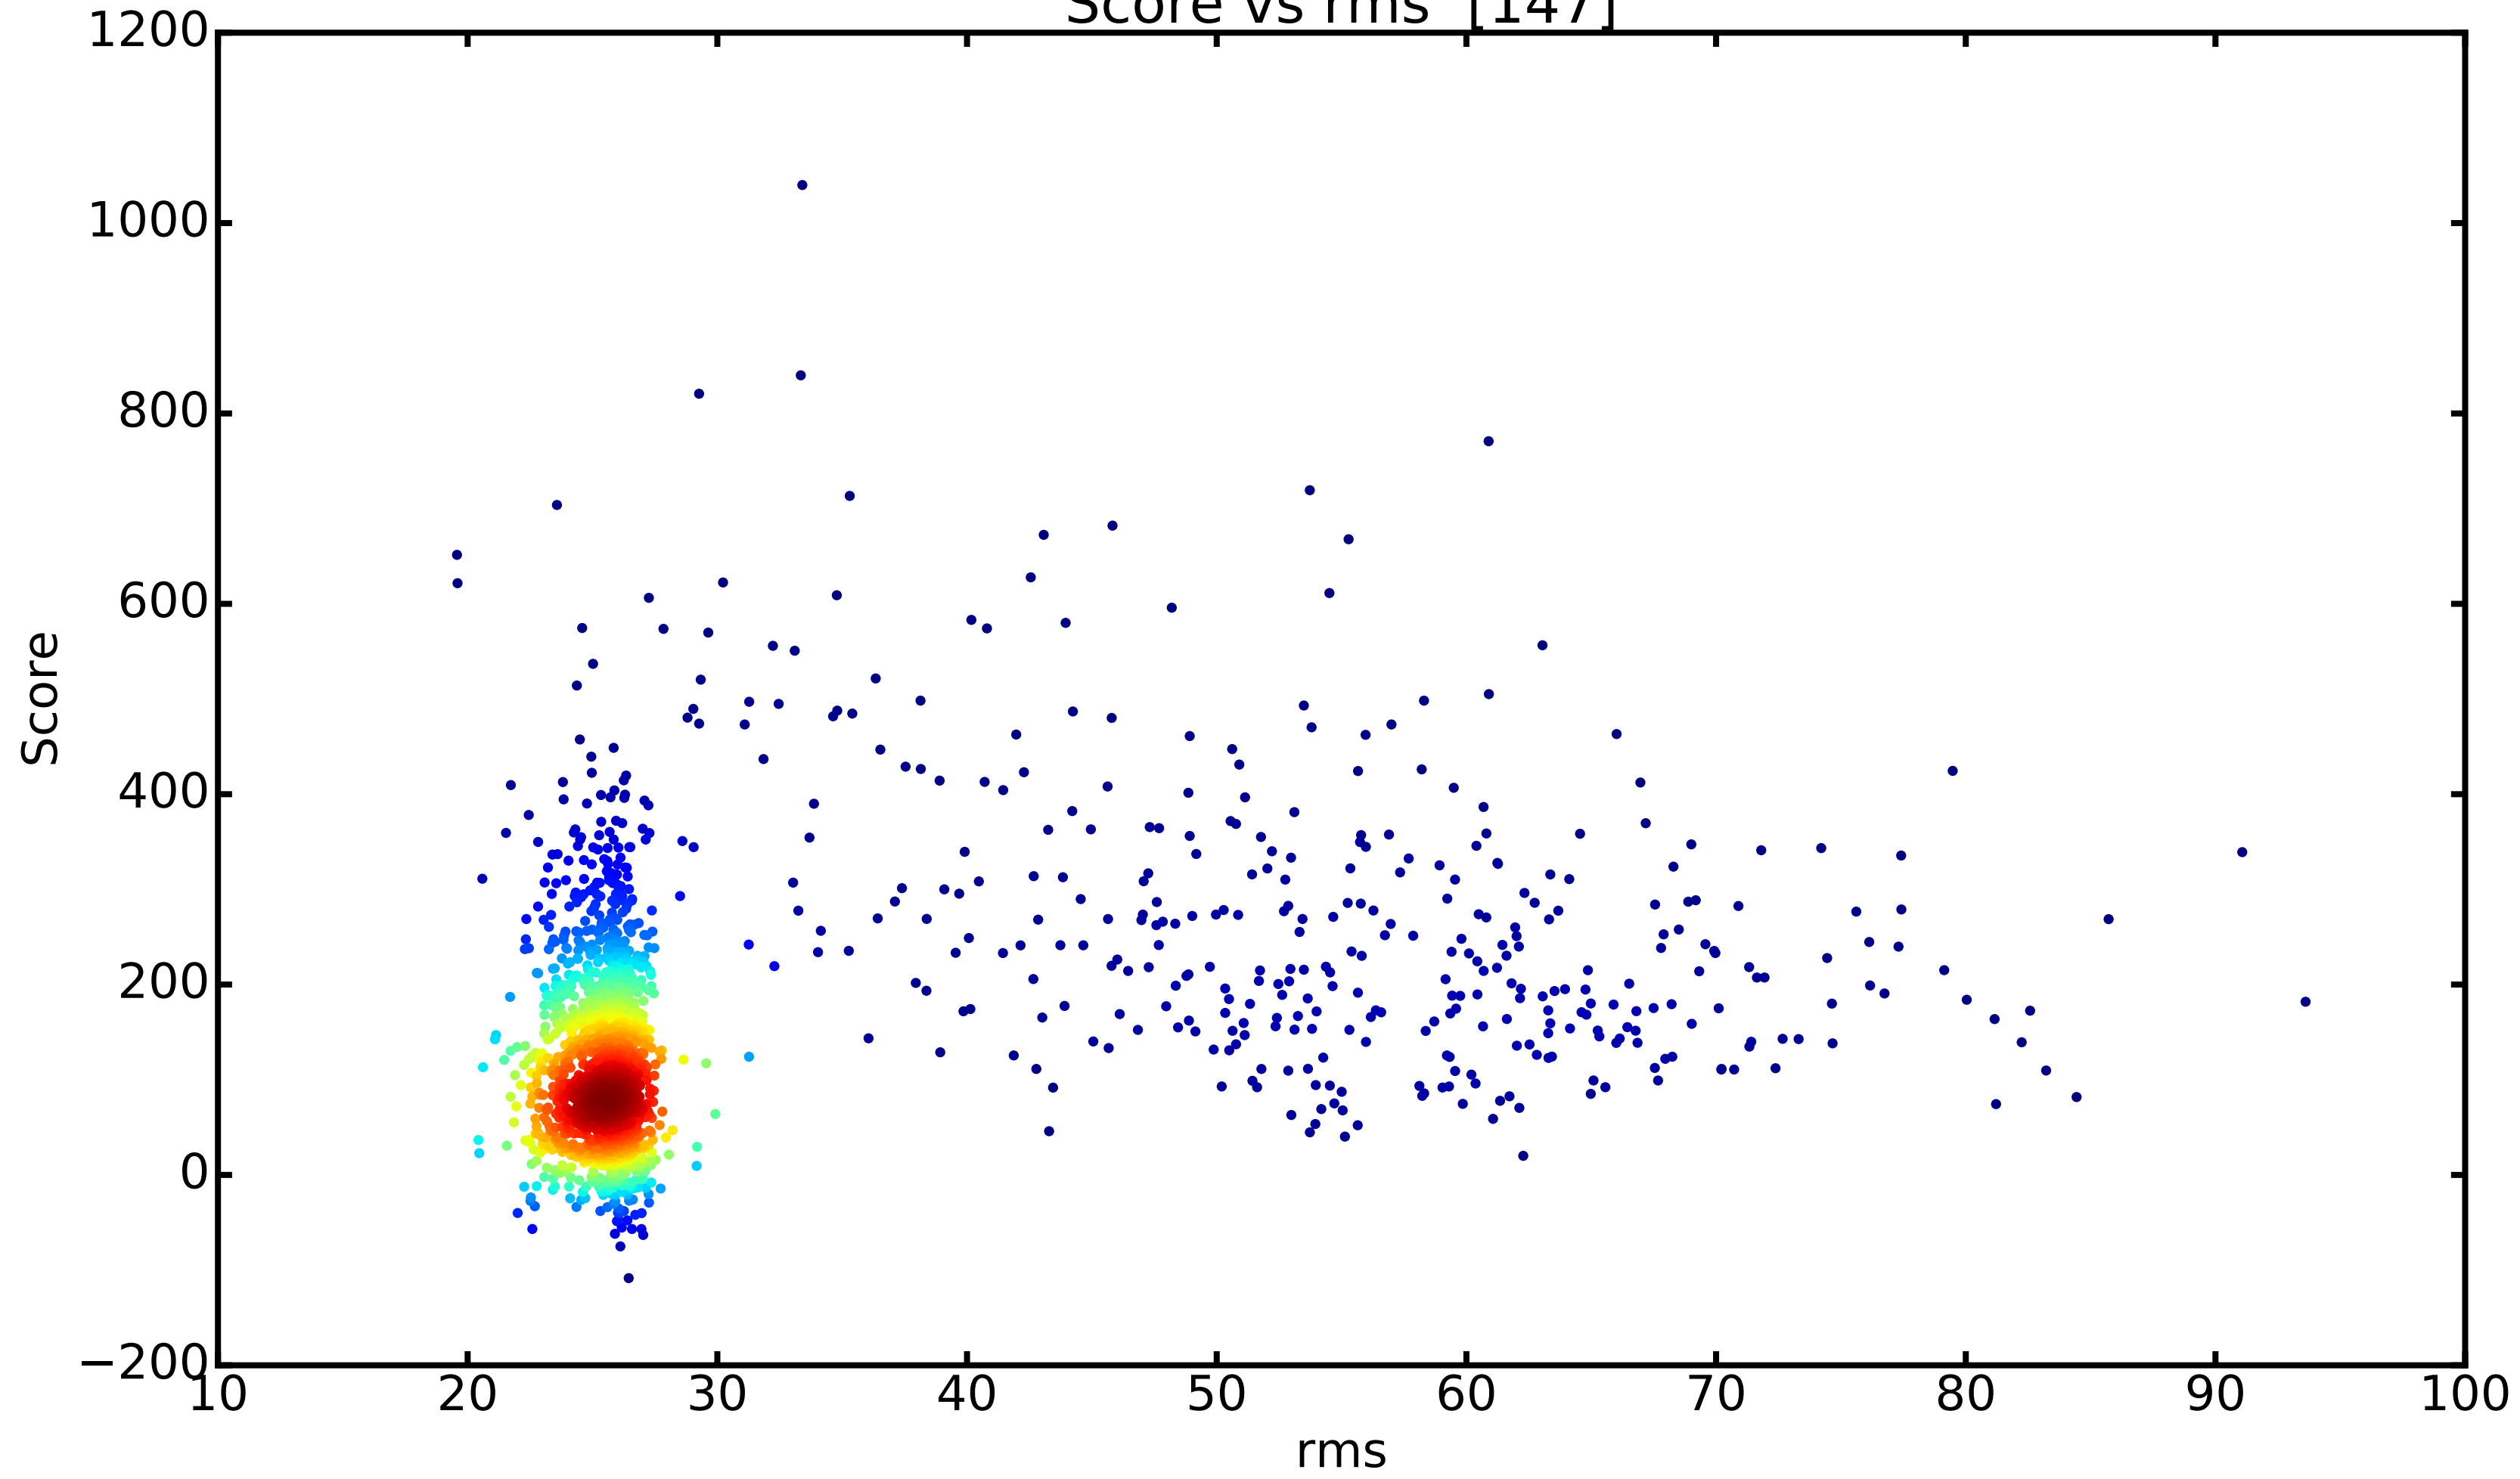

Score vs rms [147]

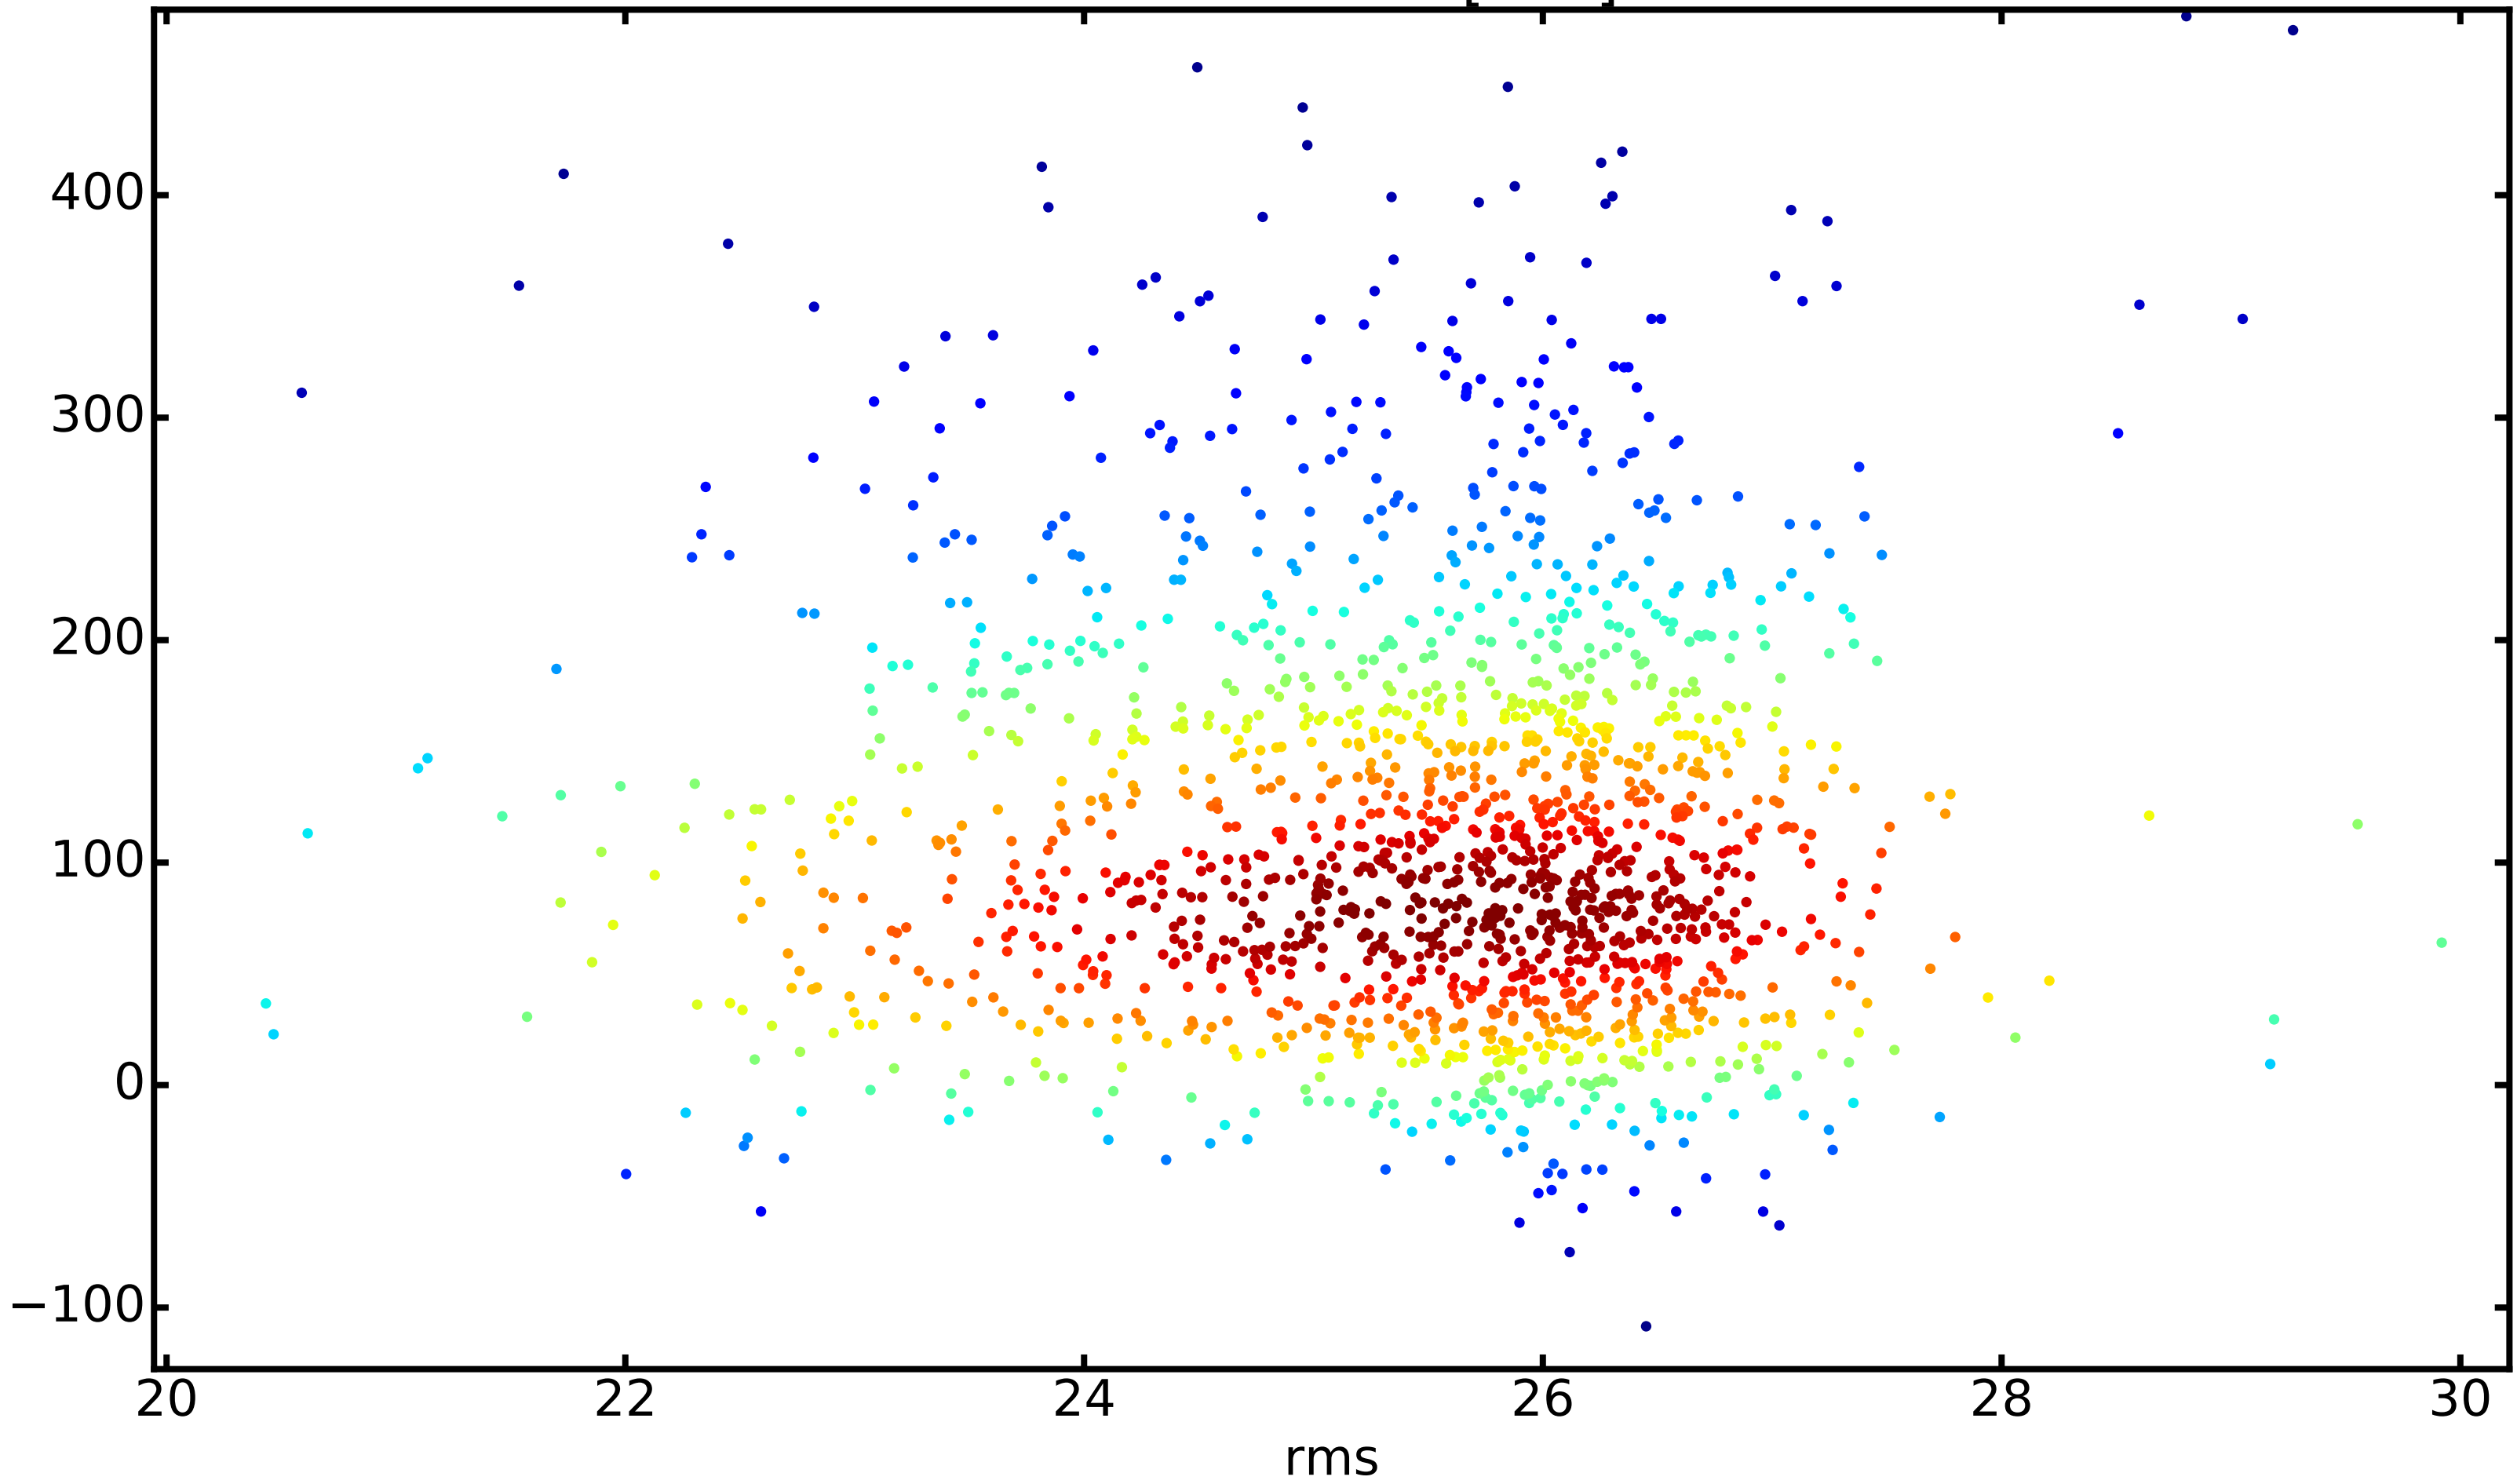

Score vs rms [155]

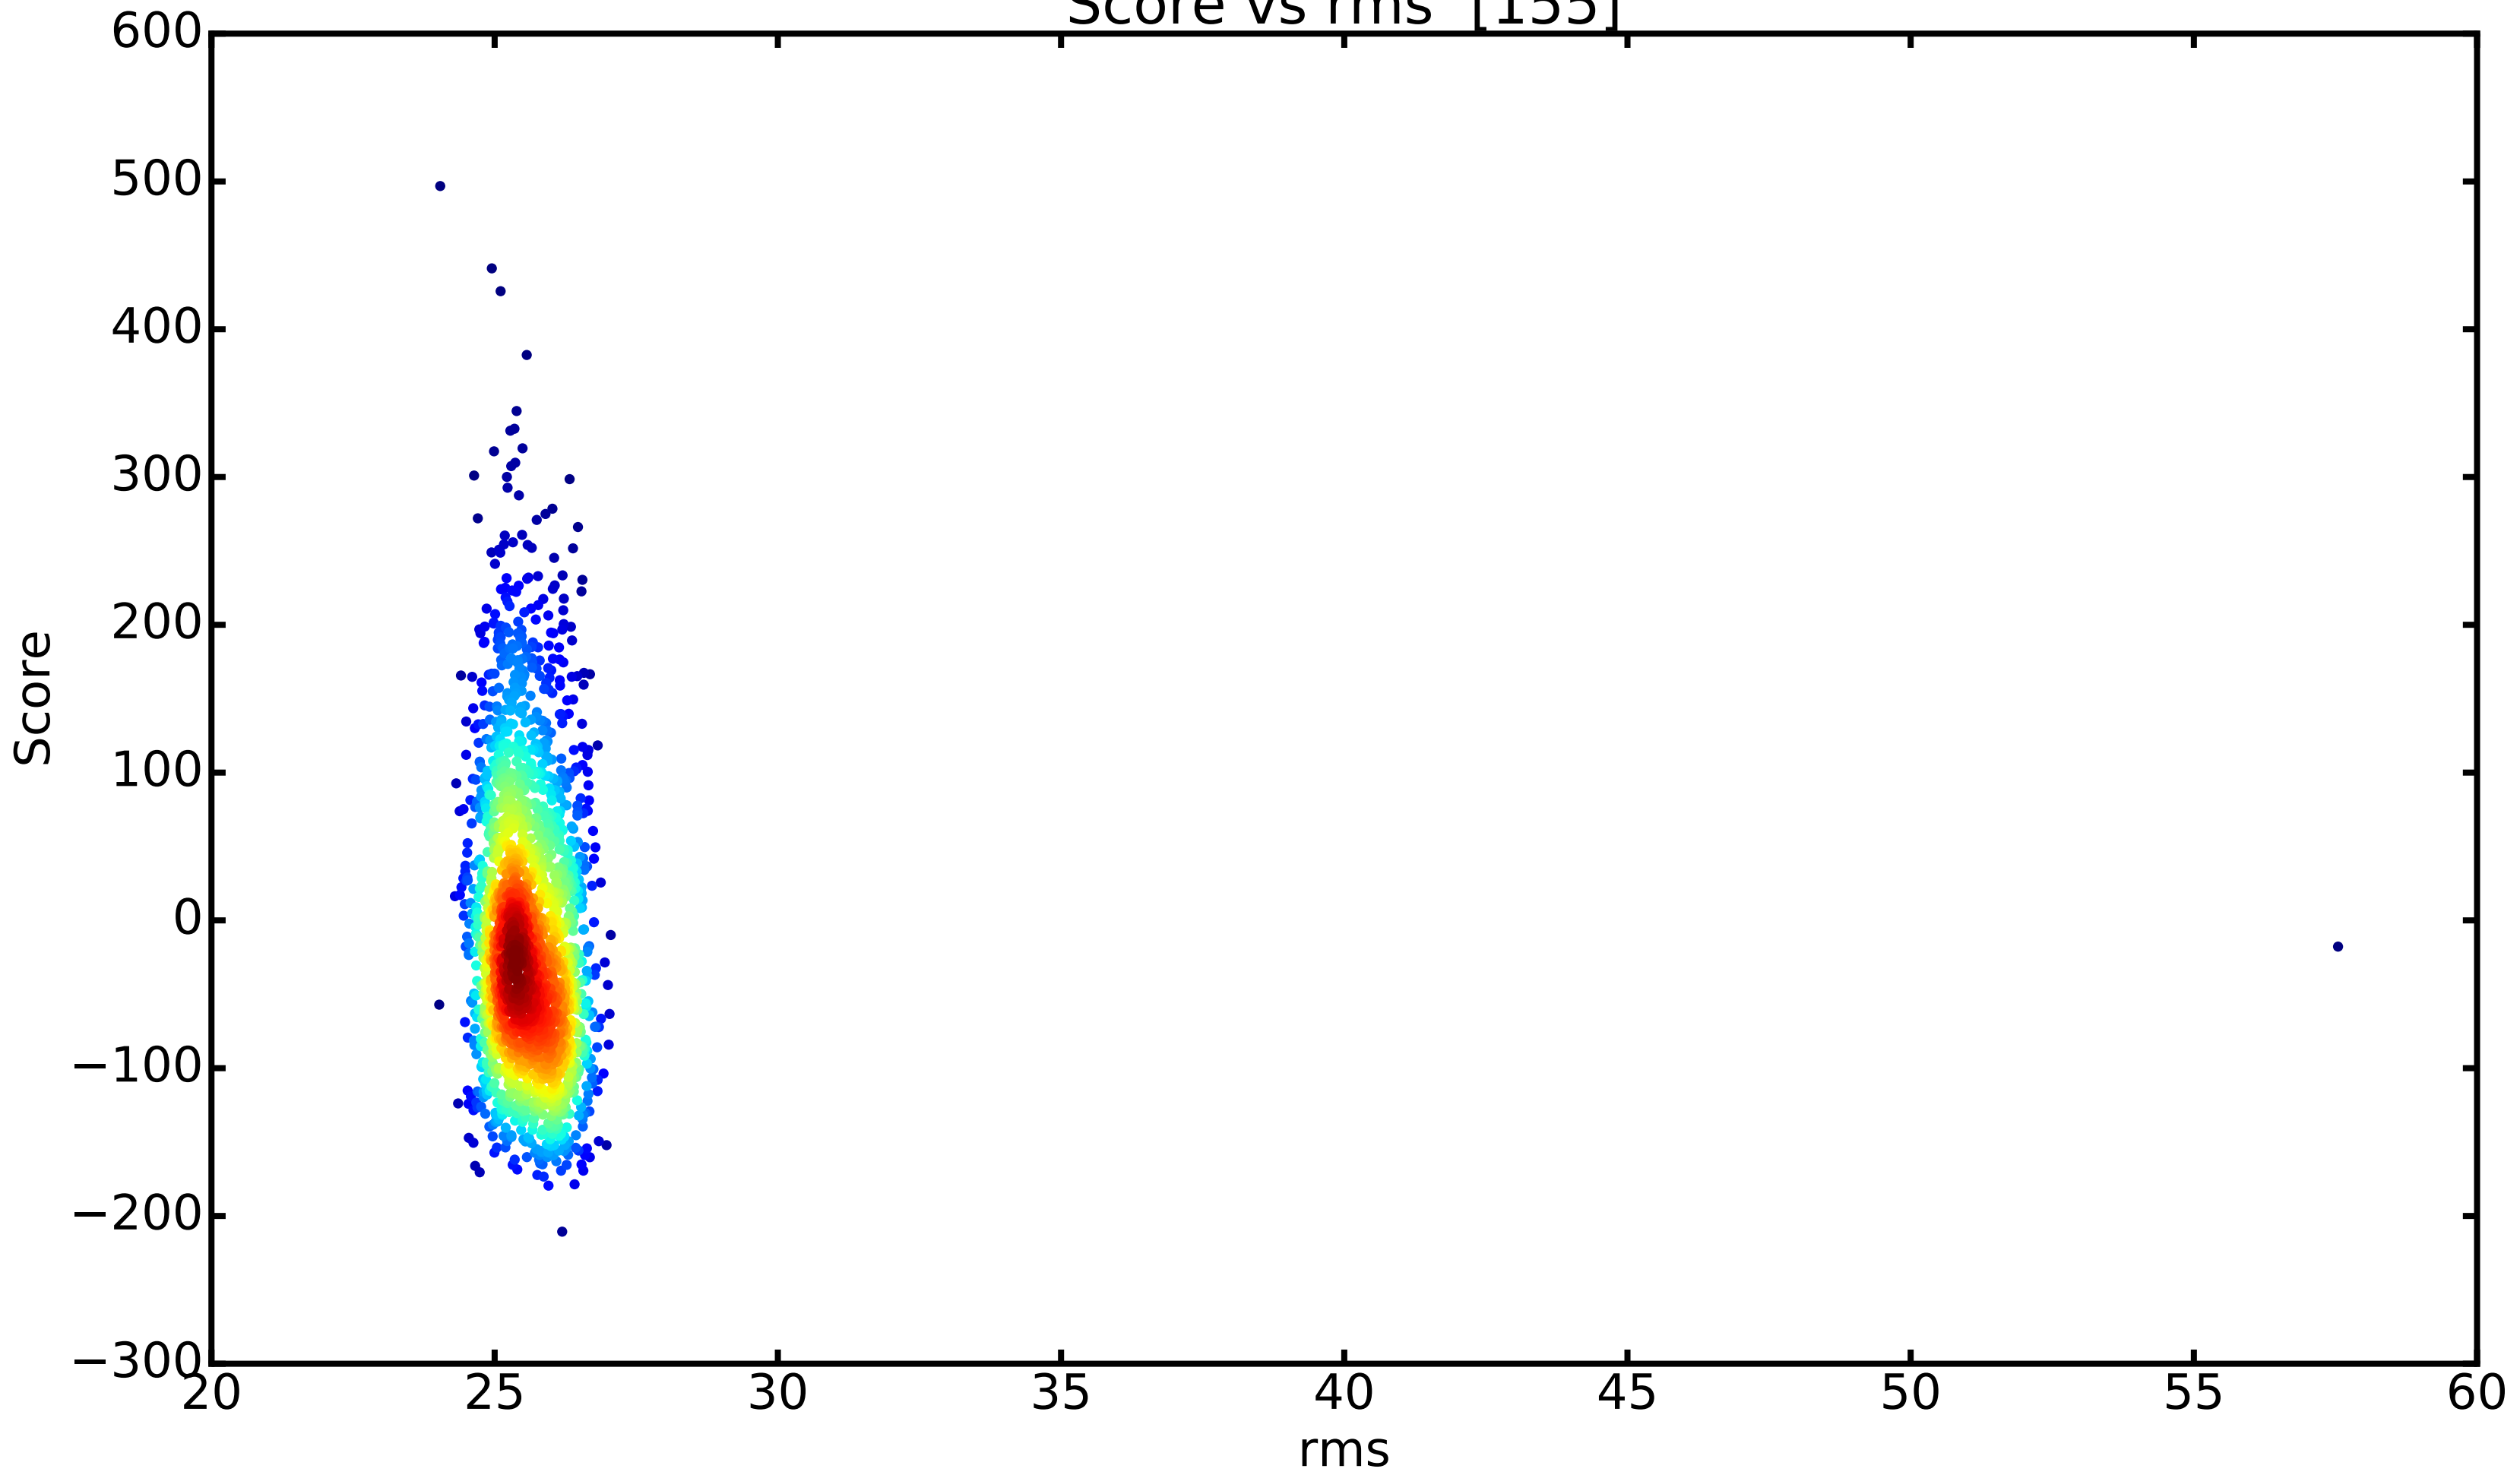

Score vs rms [155]

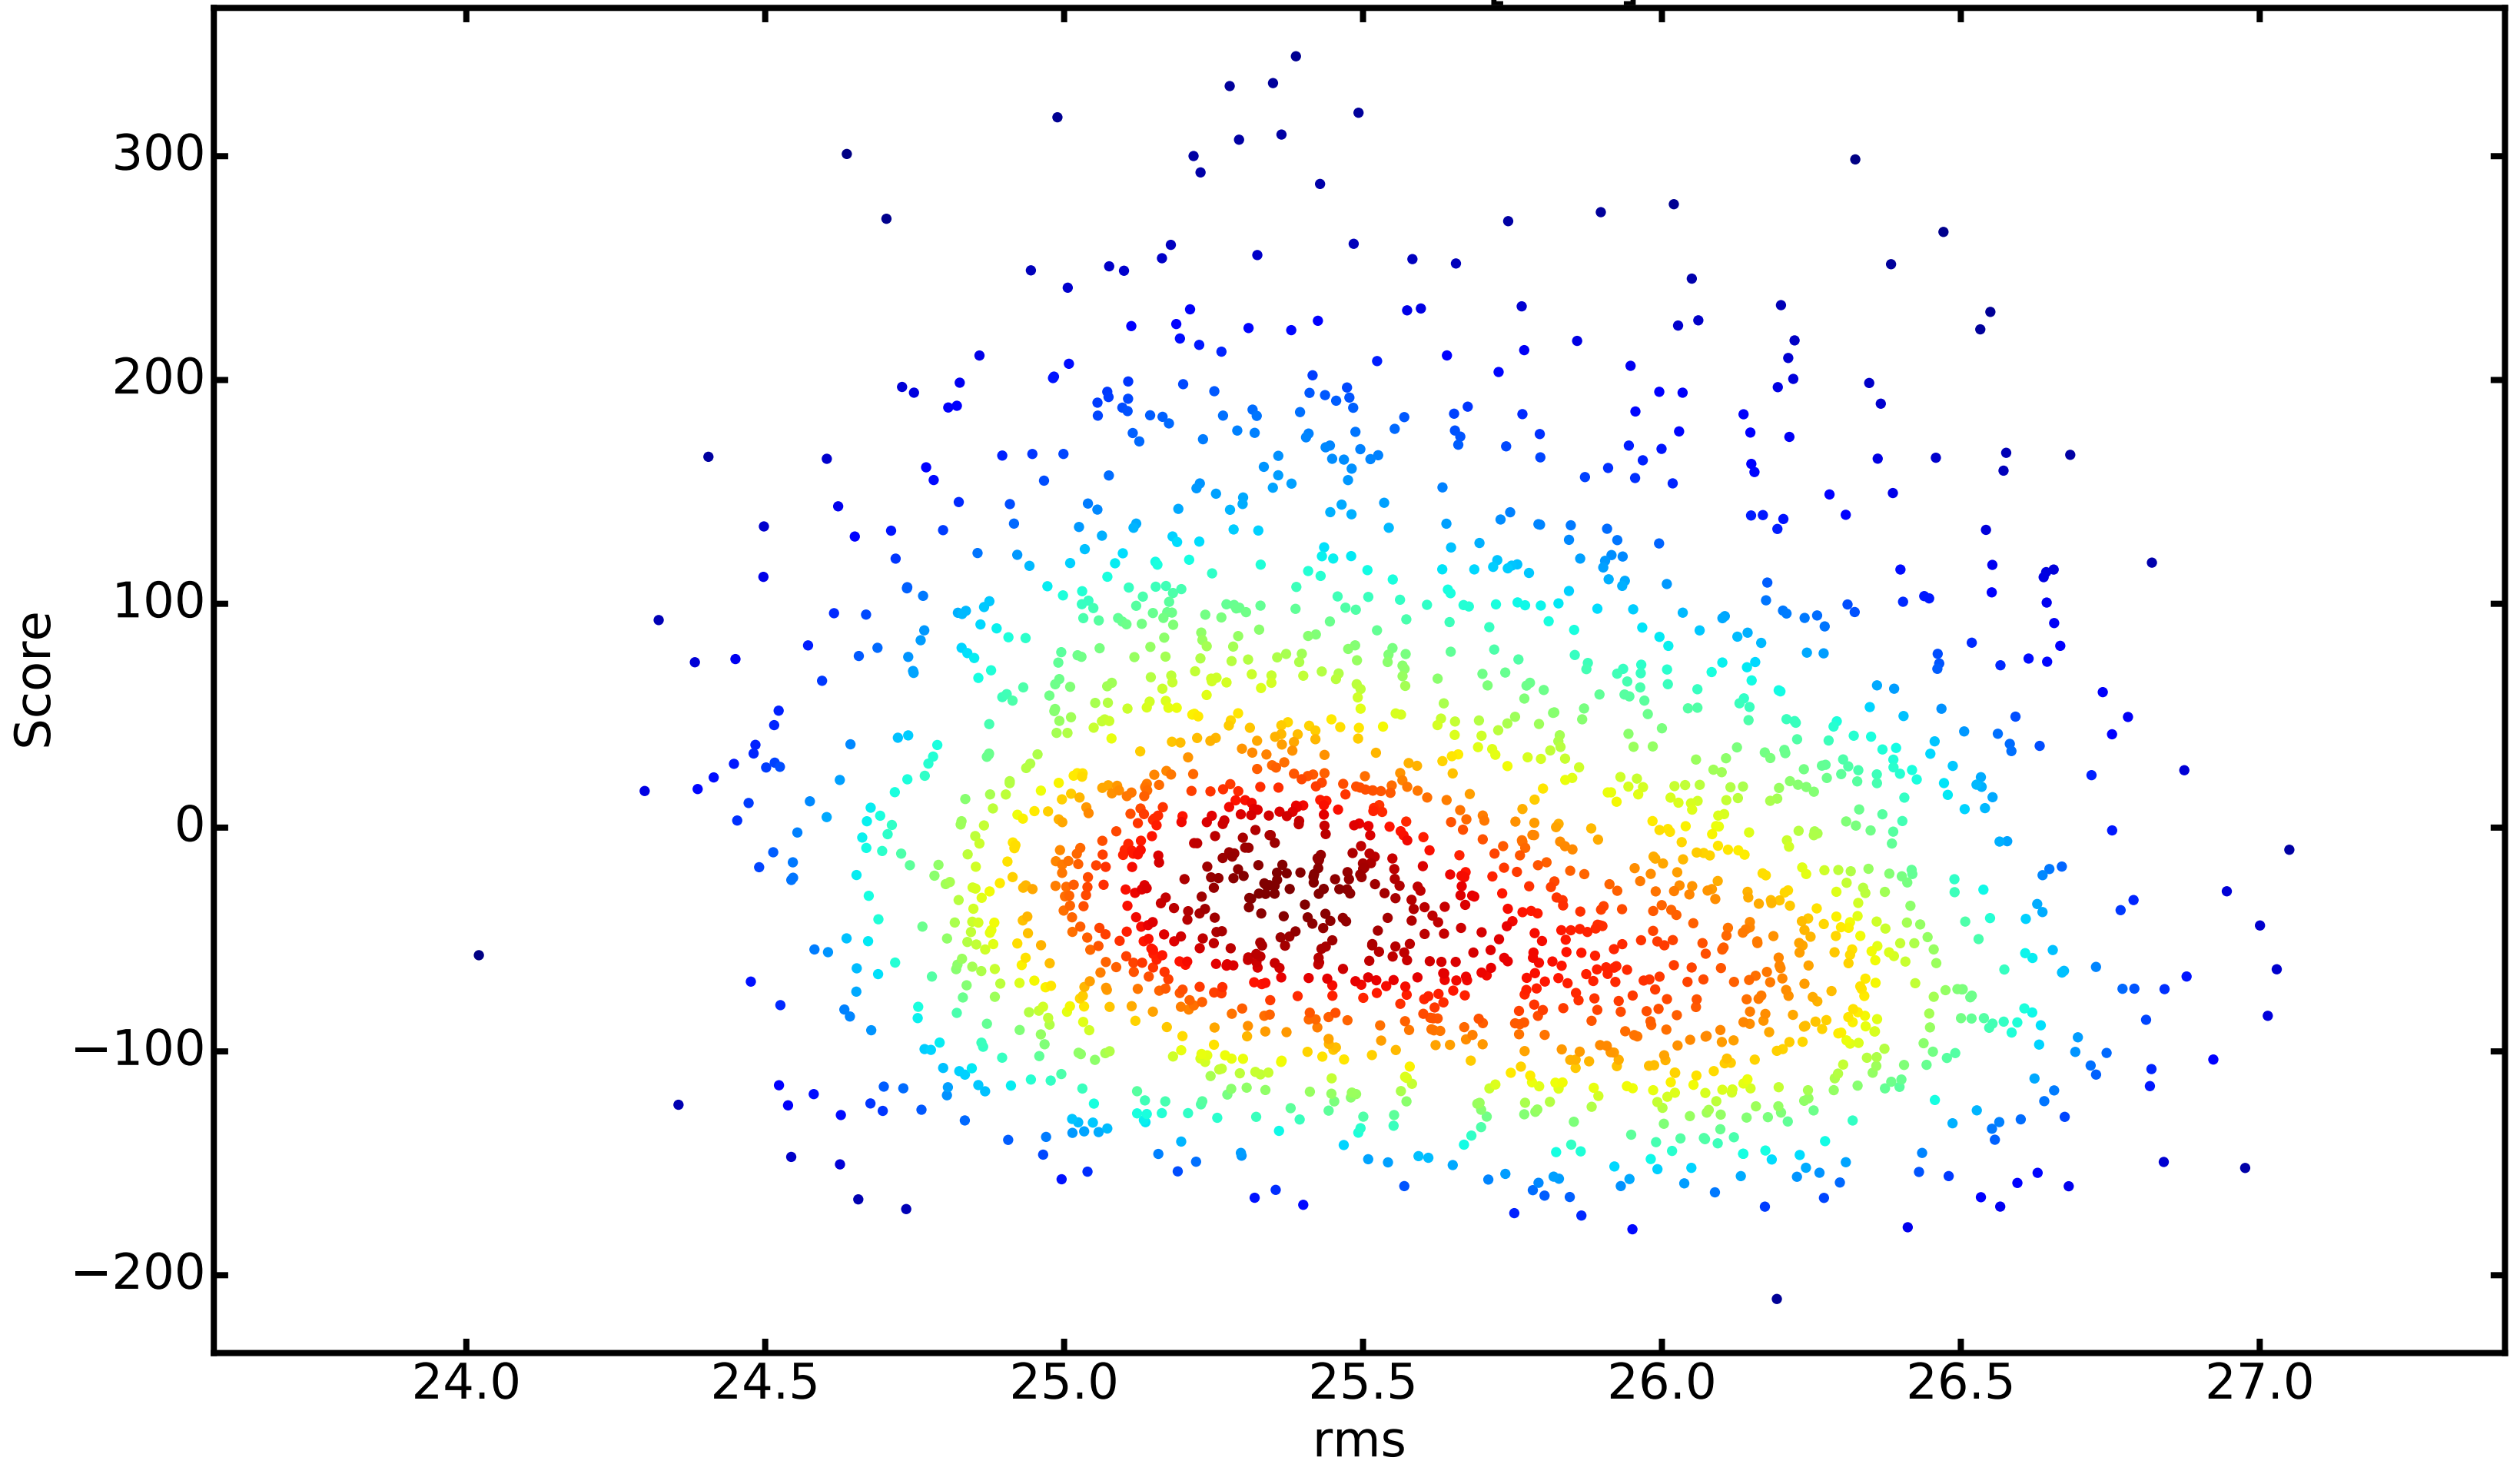

Score vs rms [166]

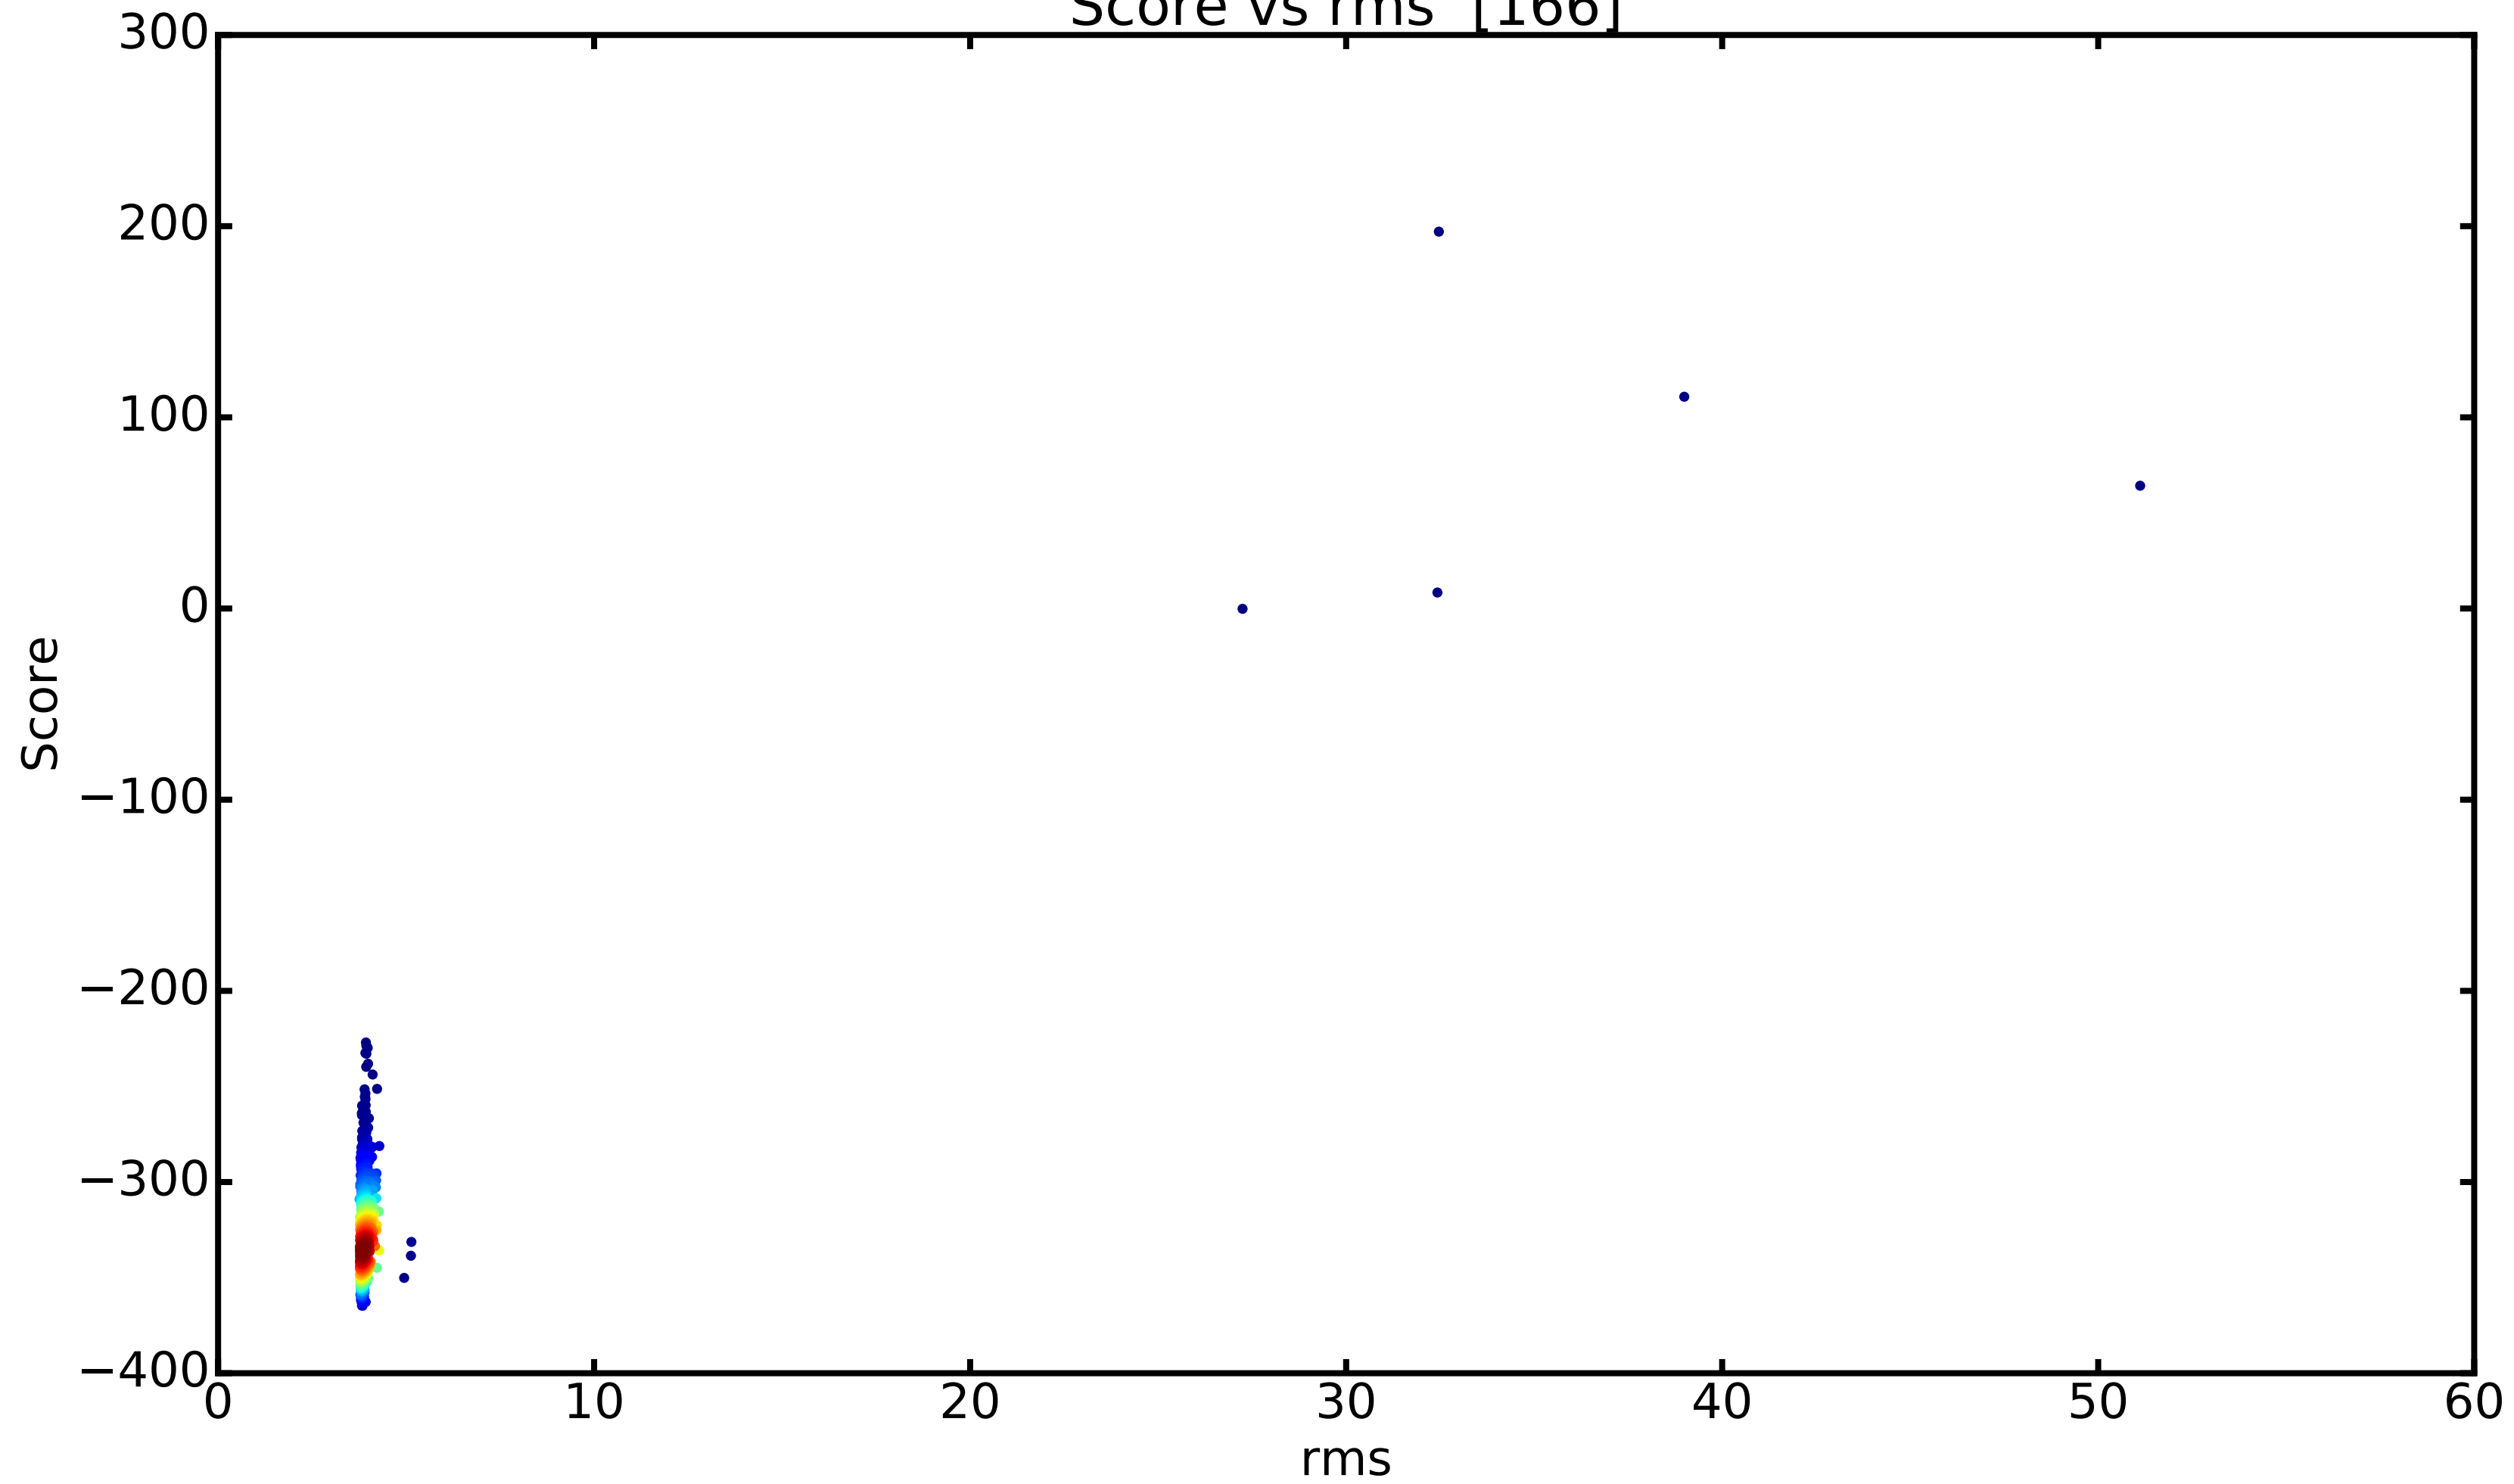



Score vs rms [166]

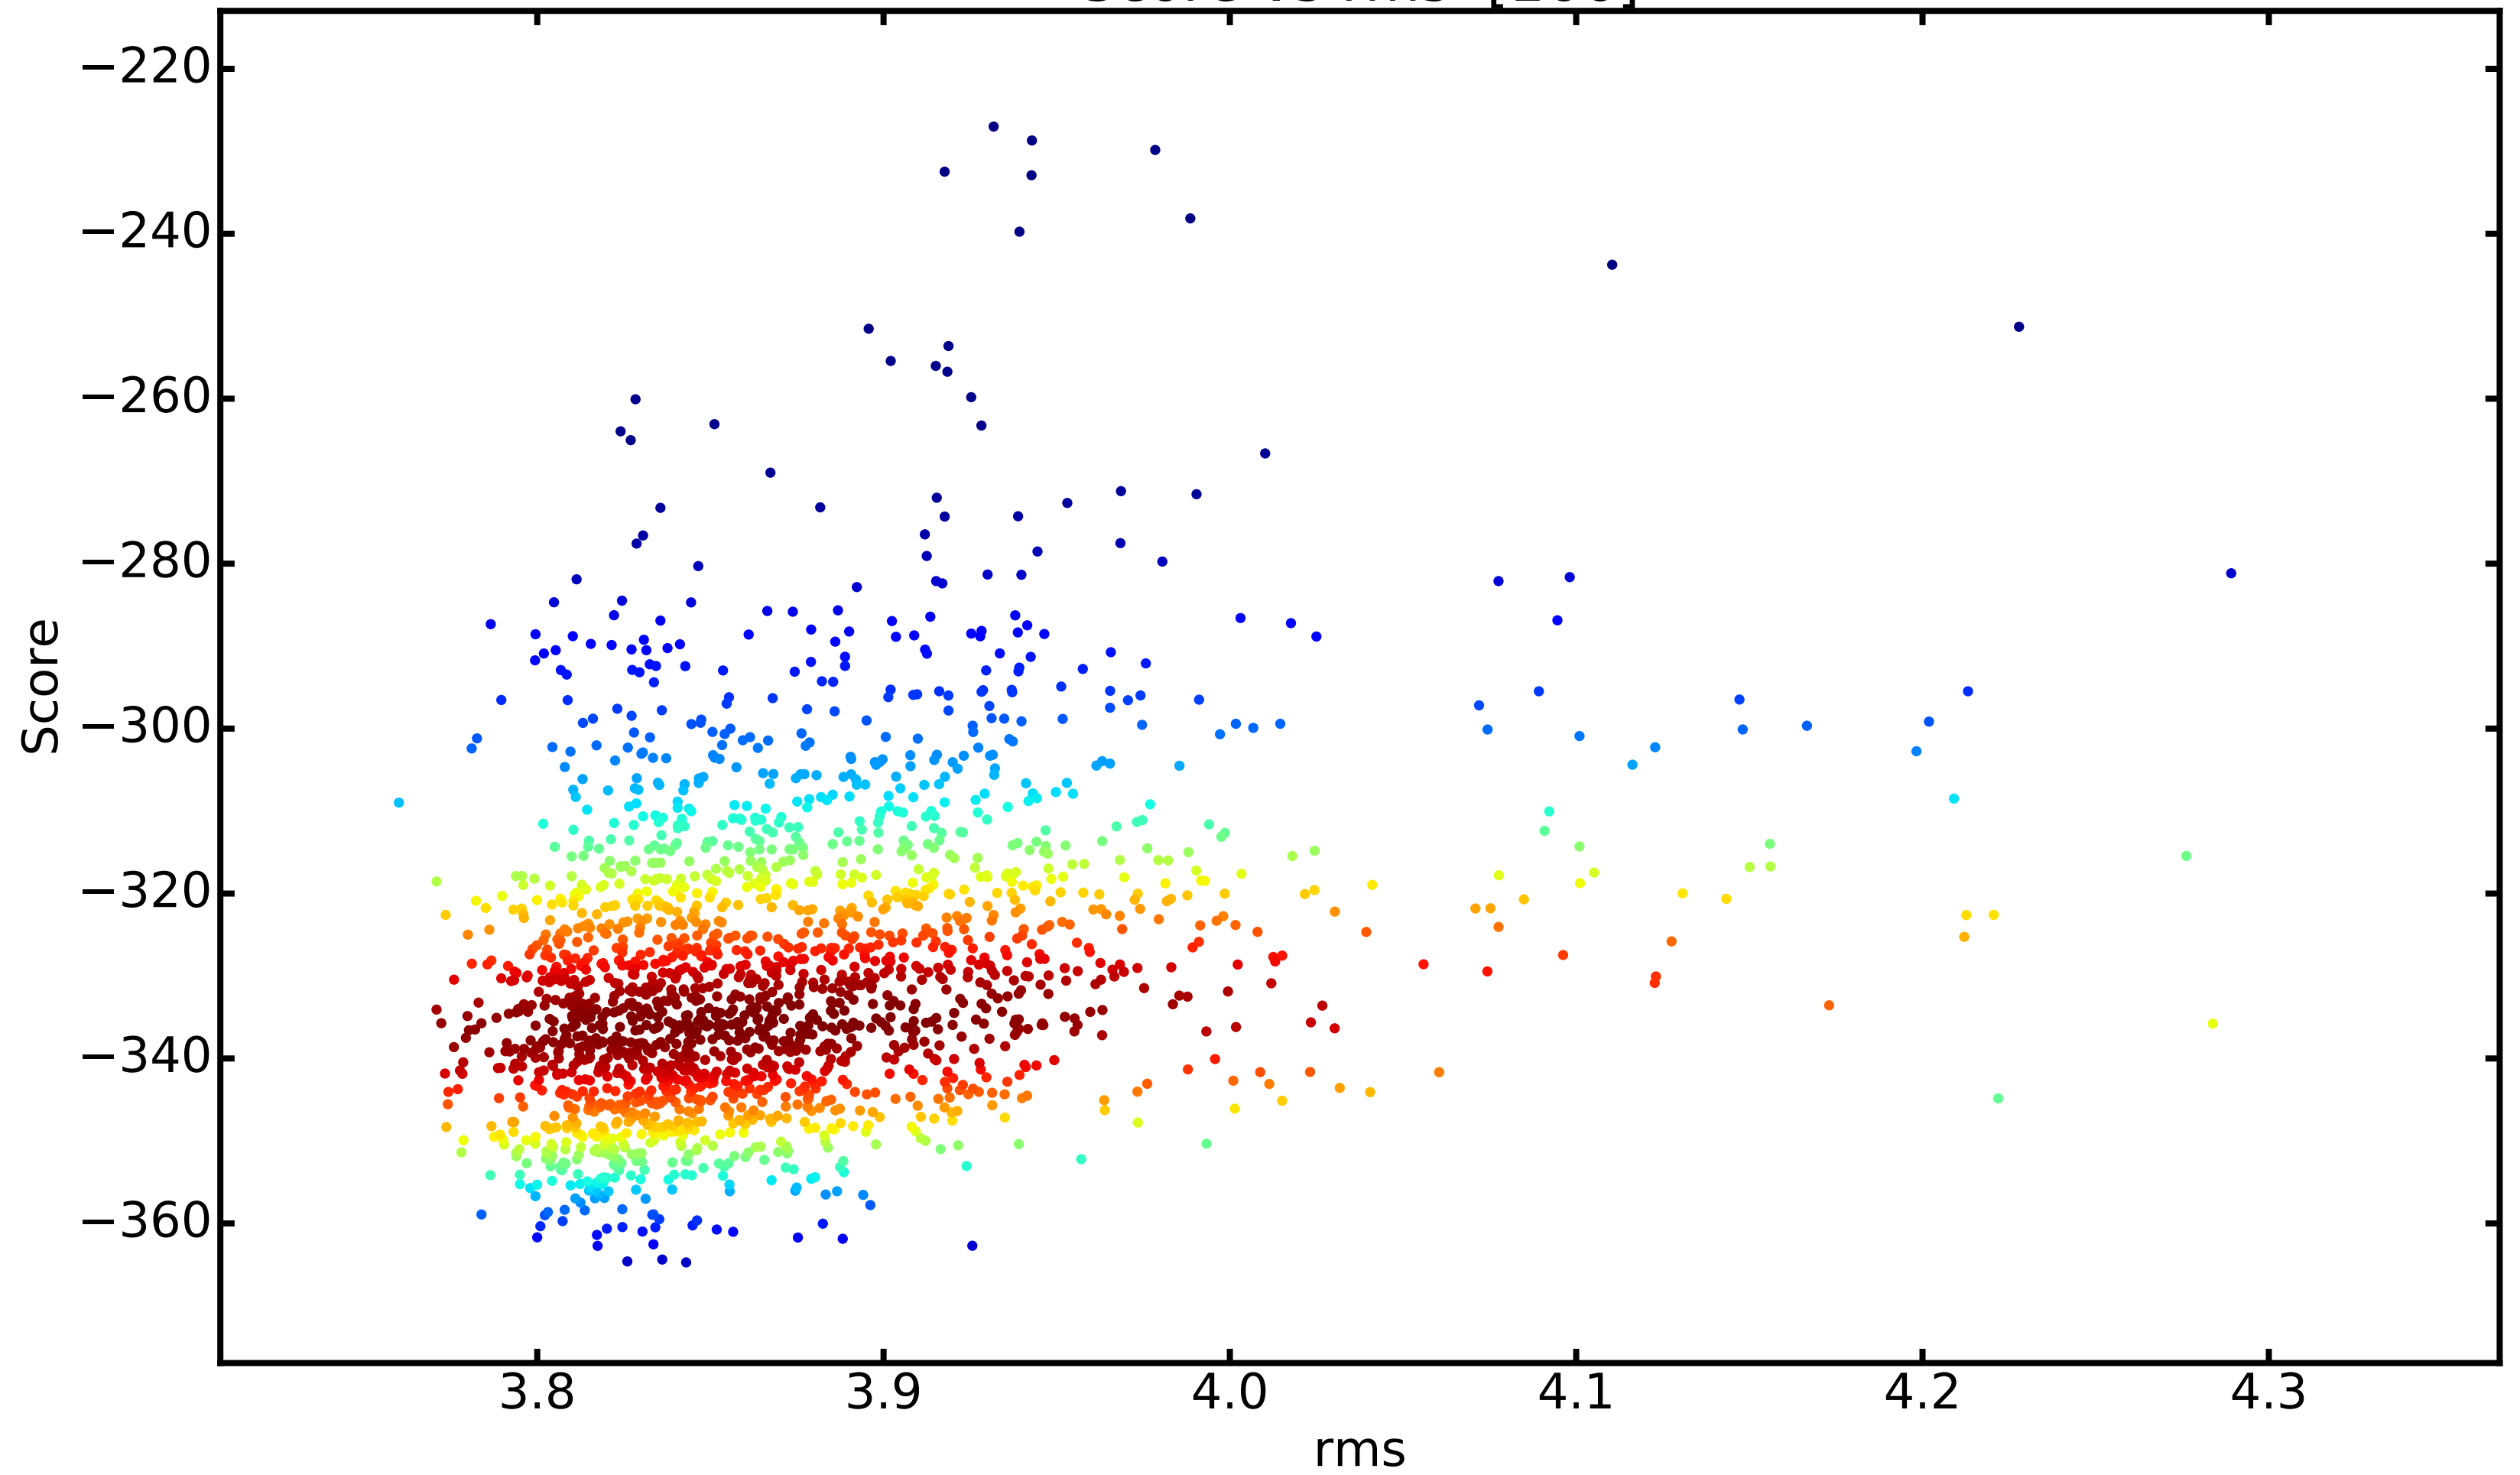

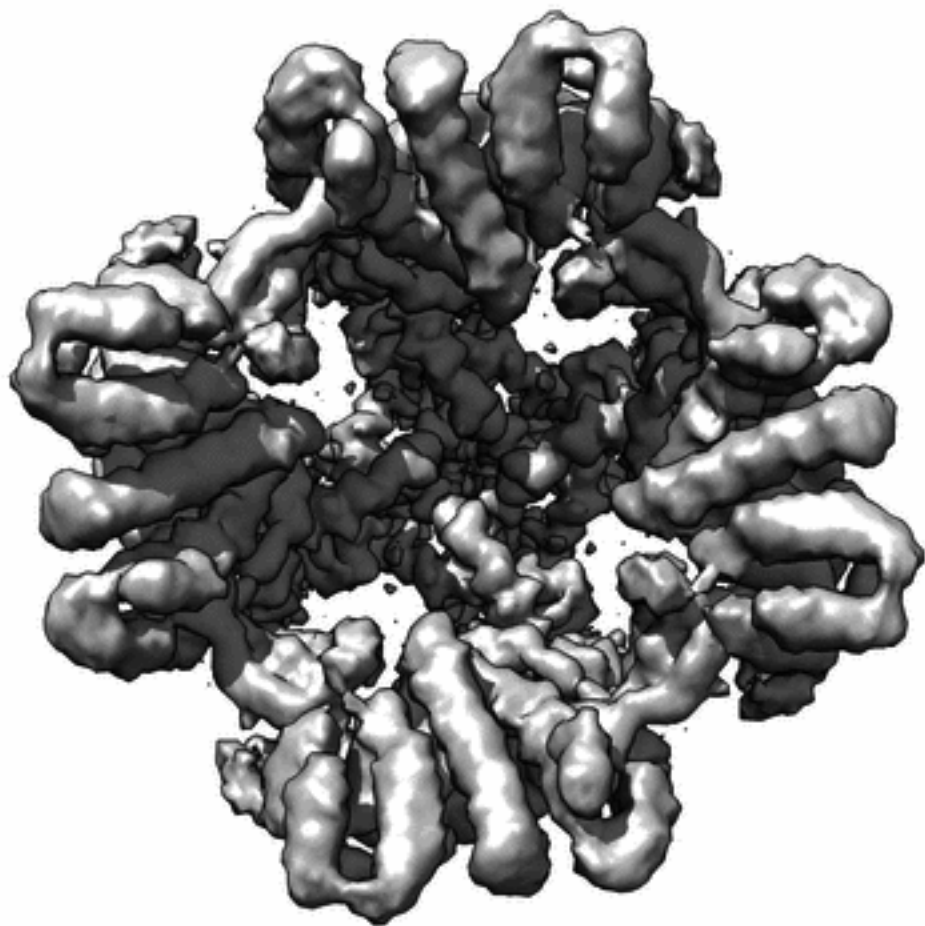

Score vs rms [101]

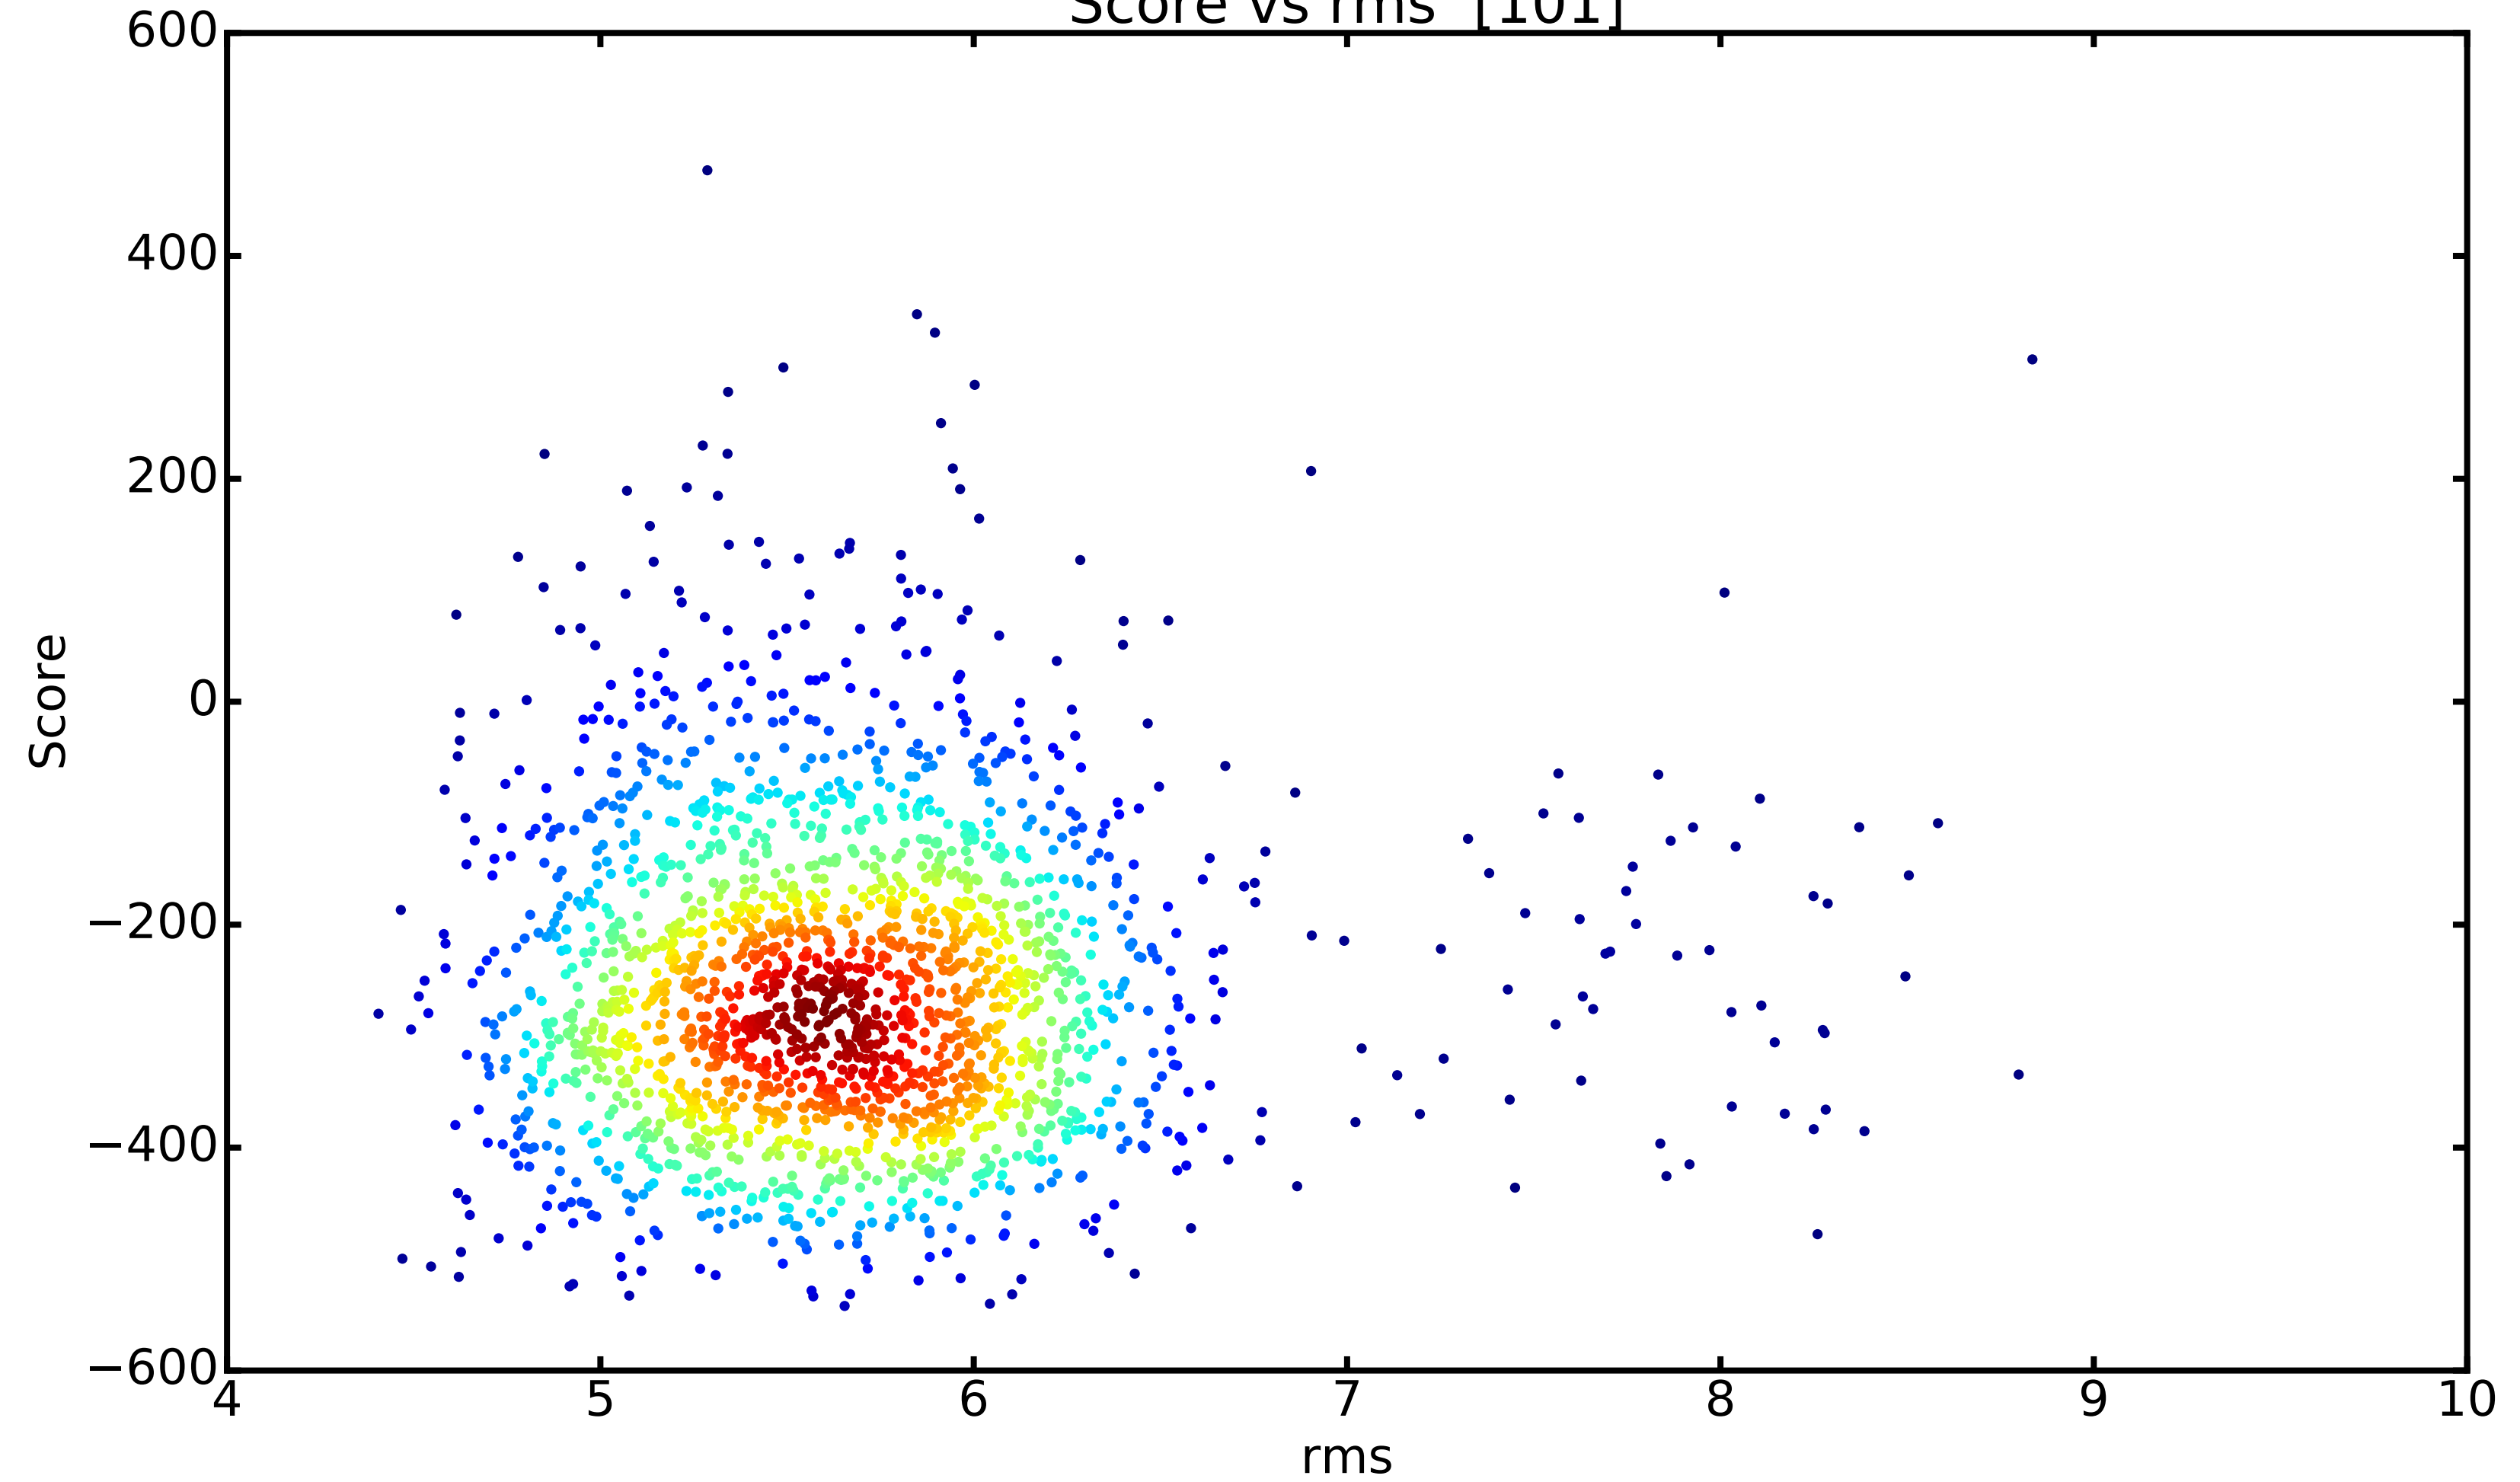

Score vs rms [101]

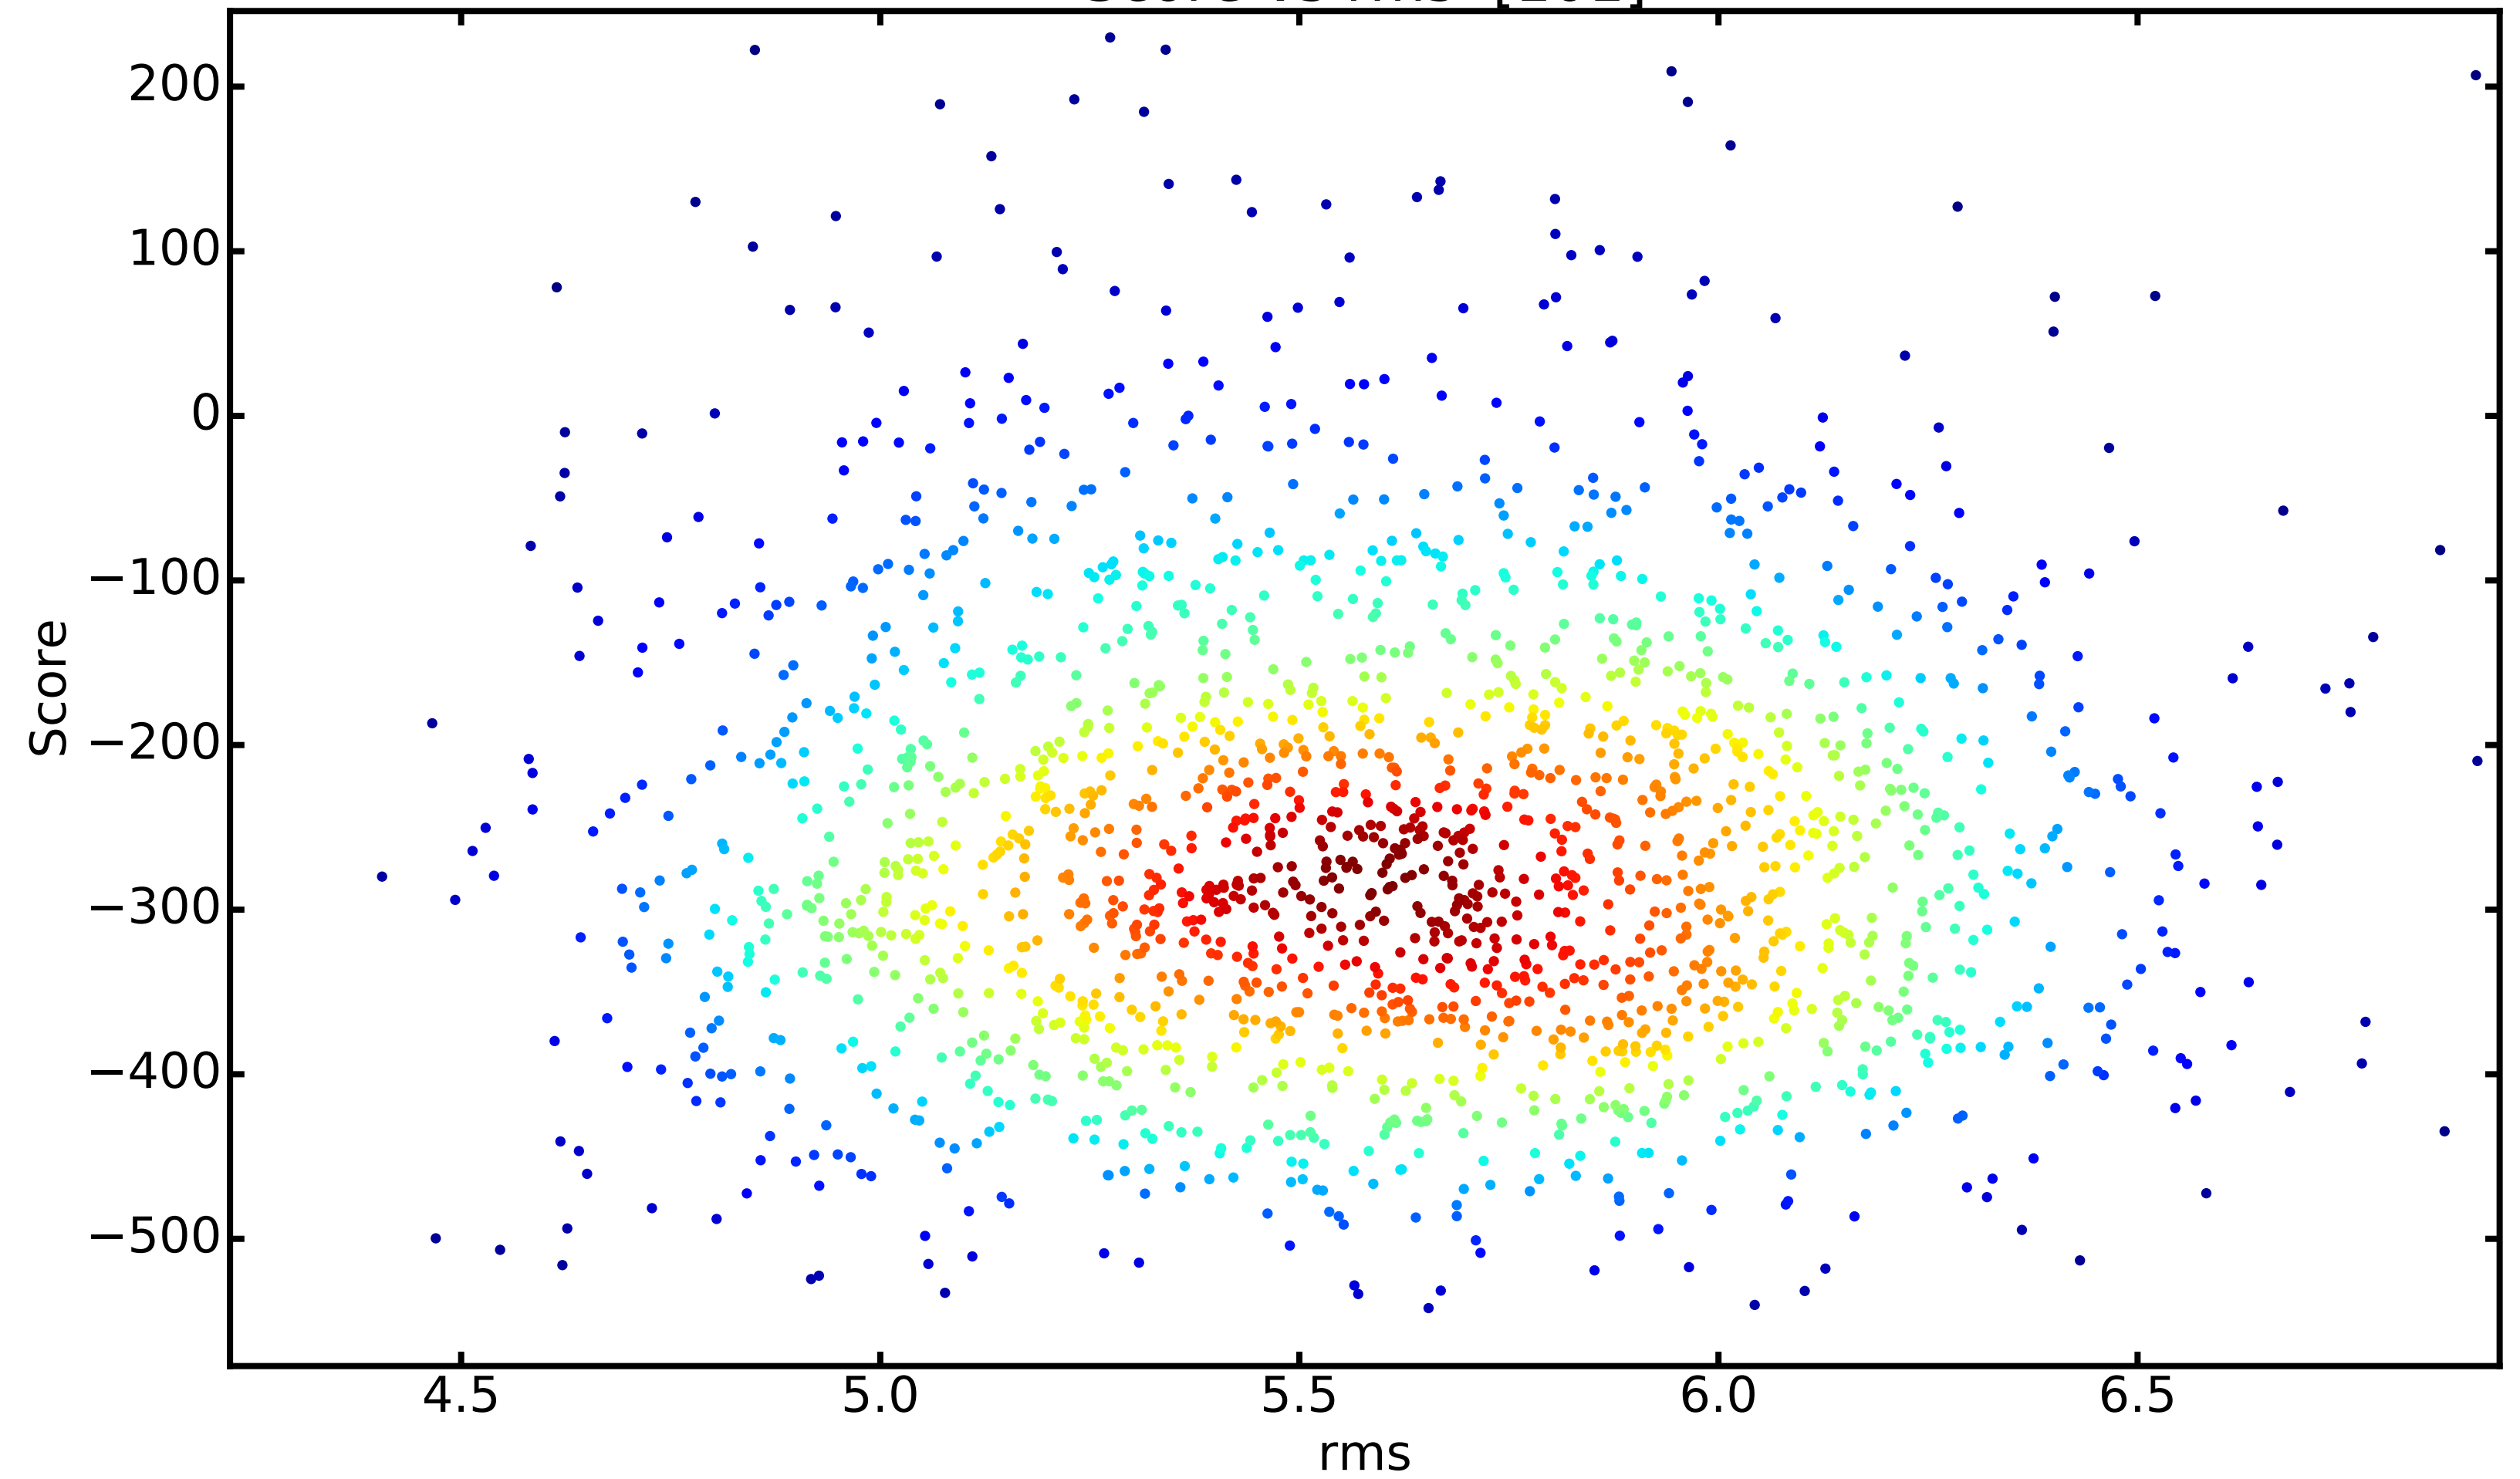

Score vs rms [115]

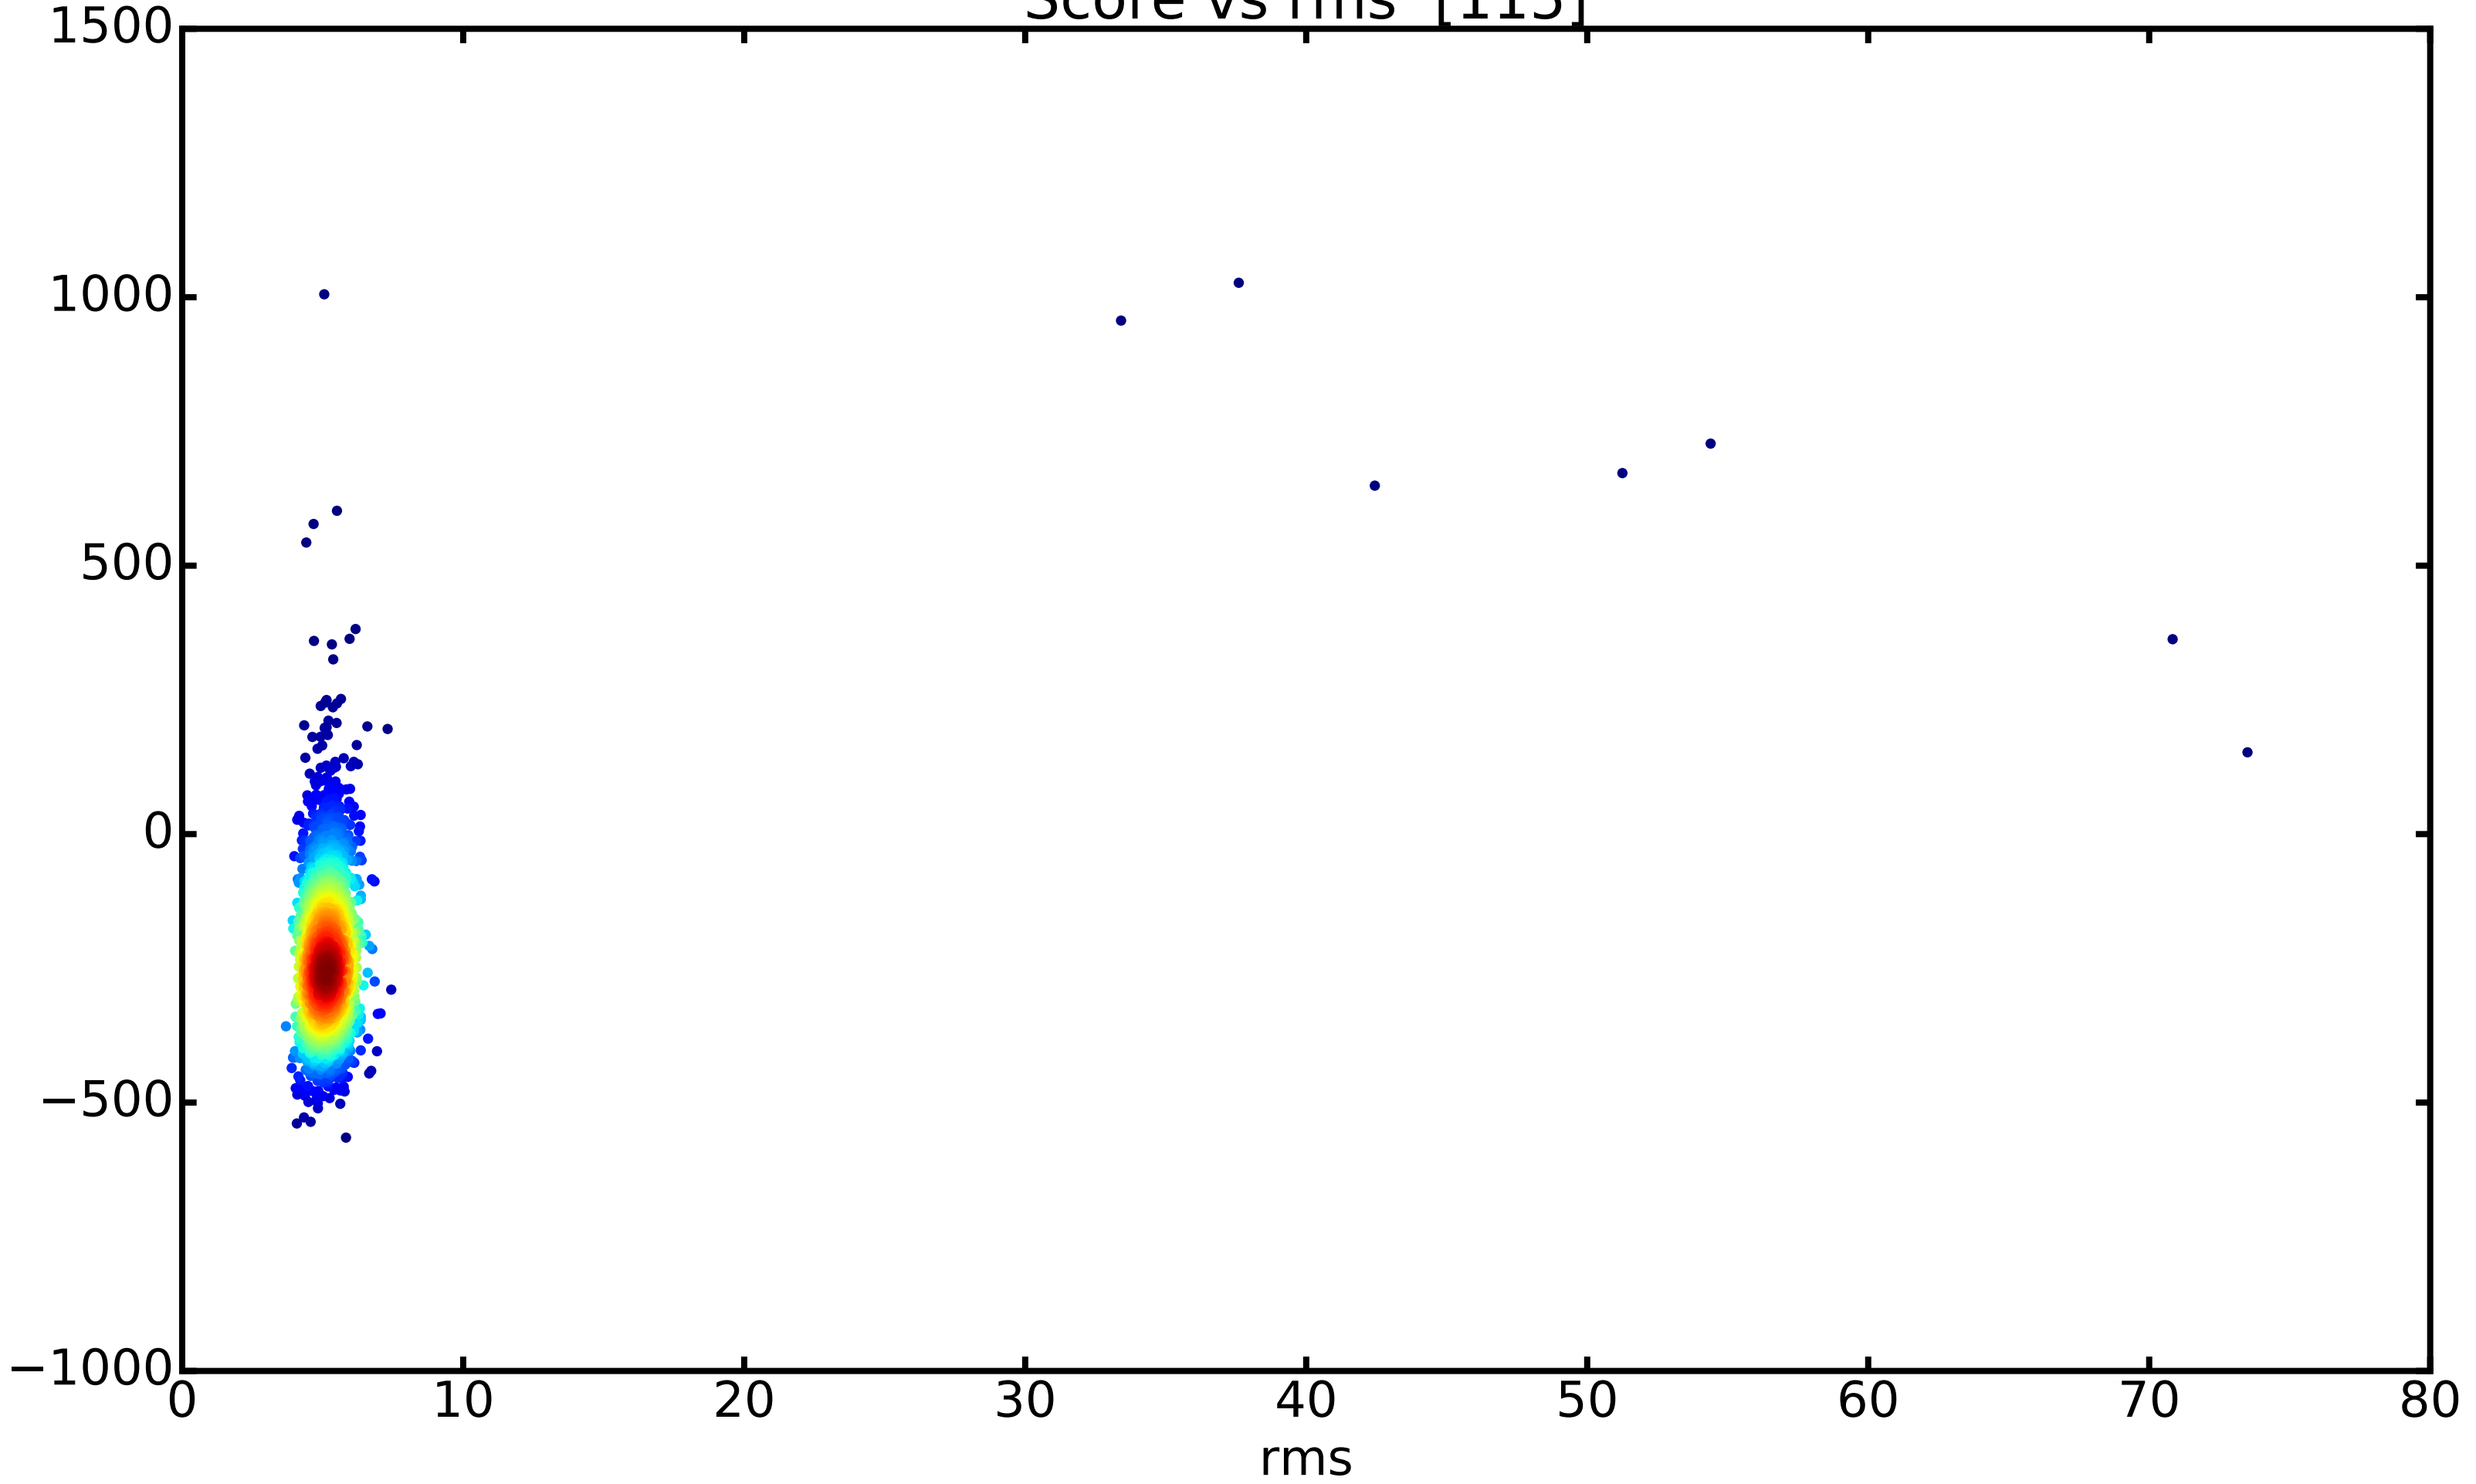

Score vs rms [115]

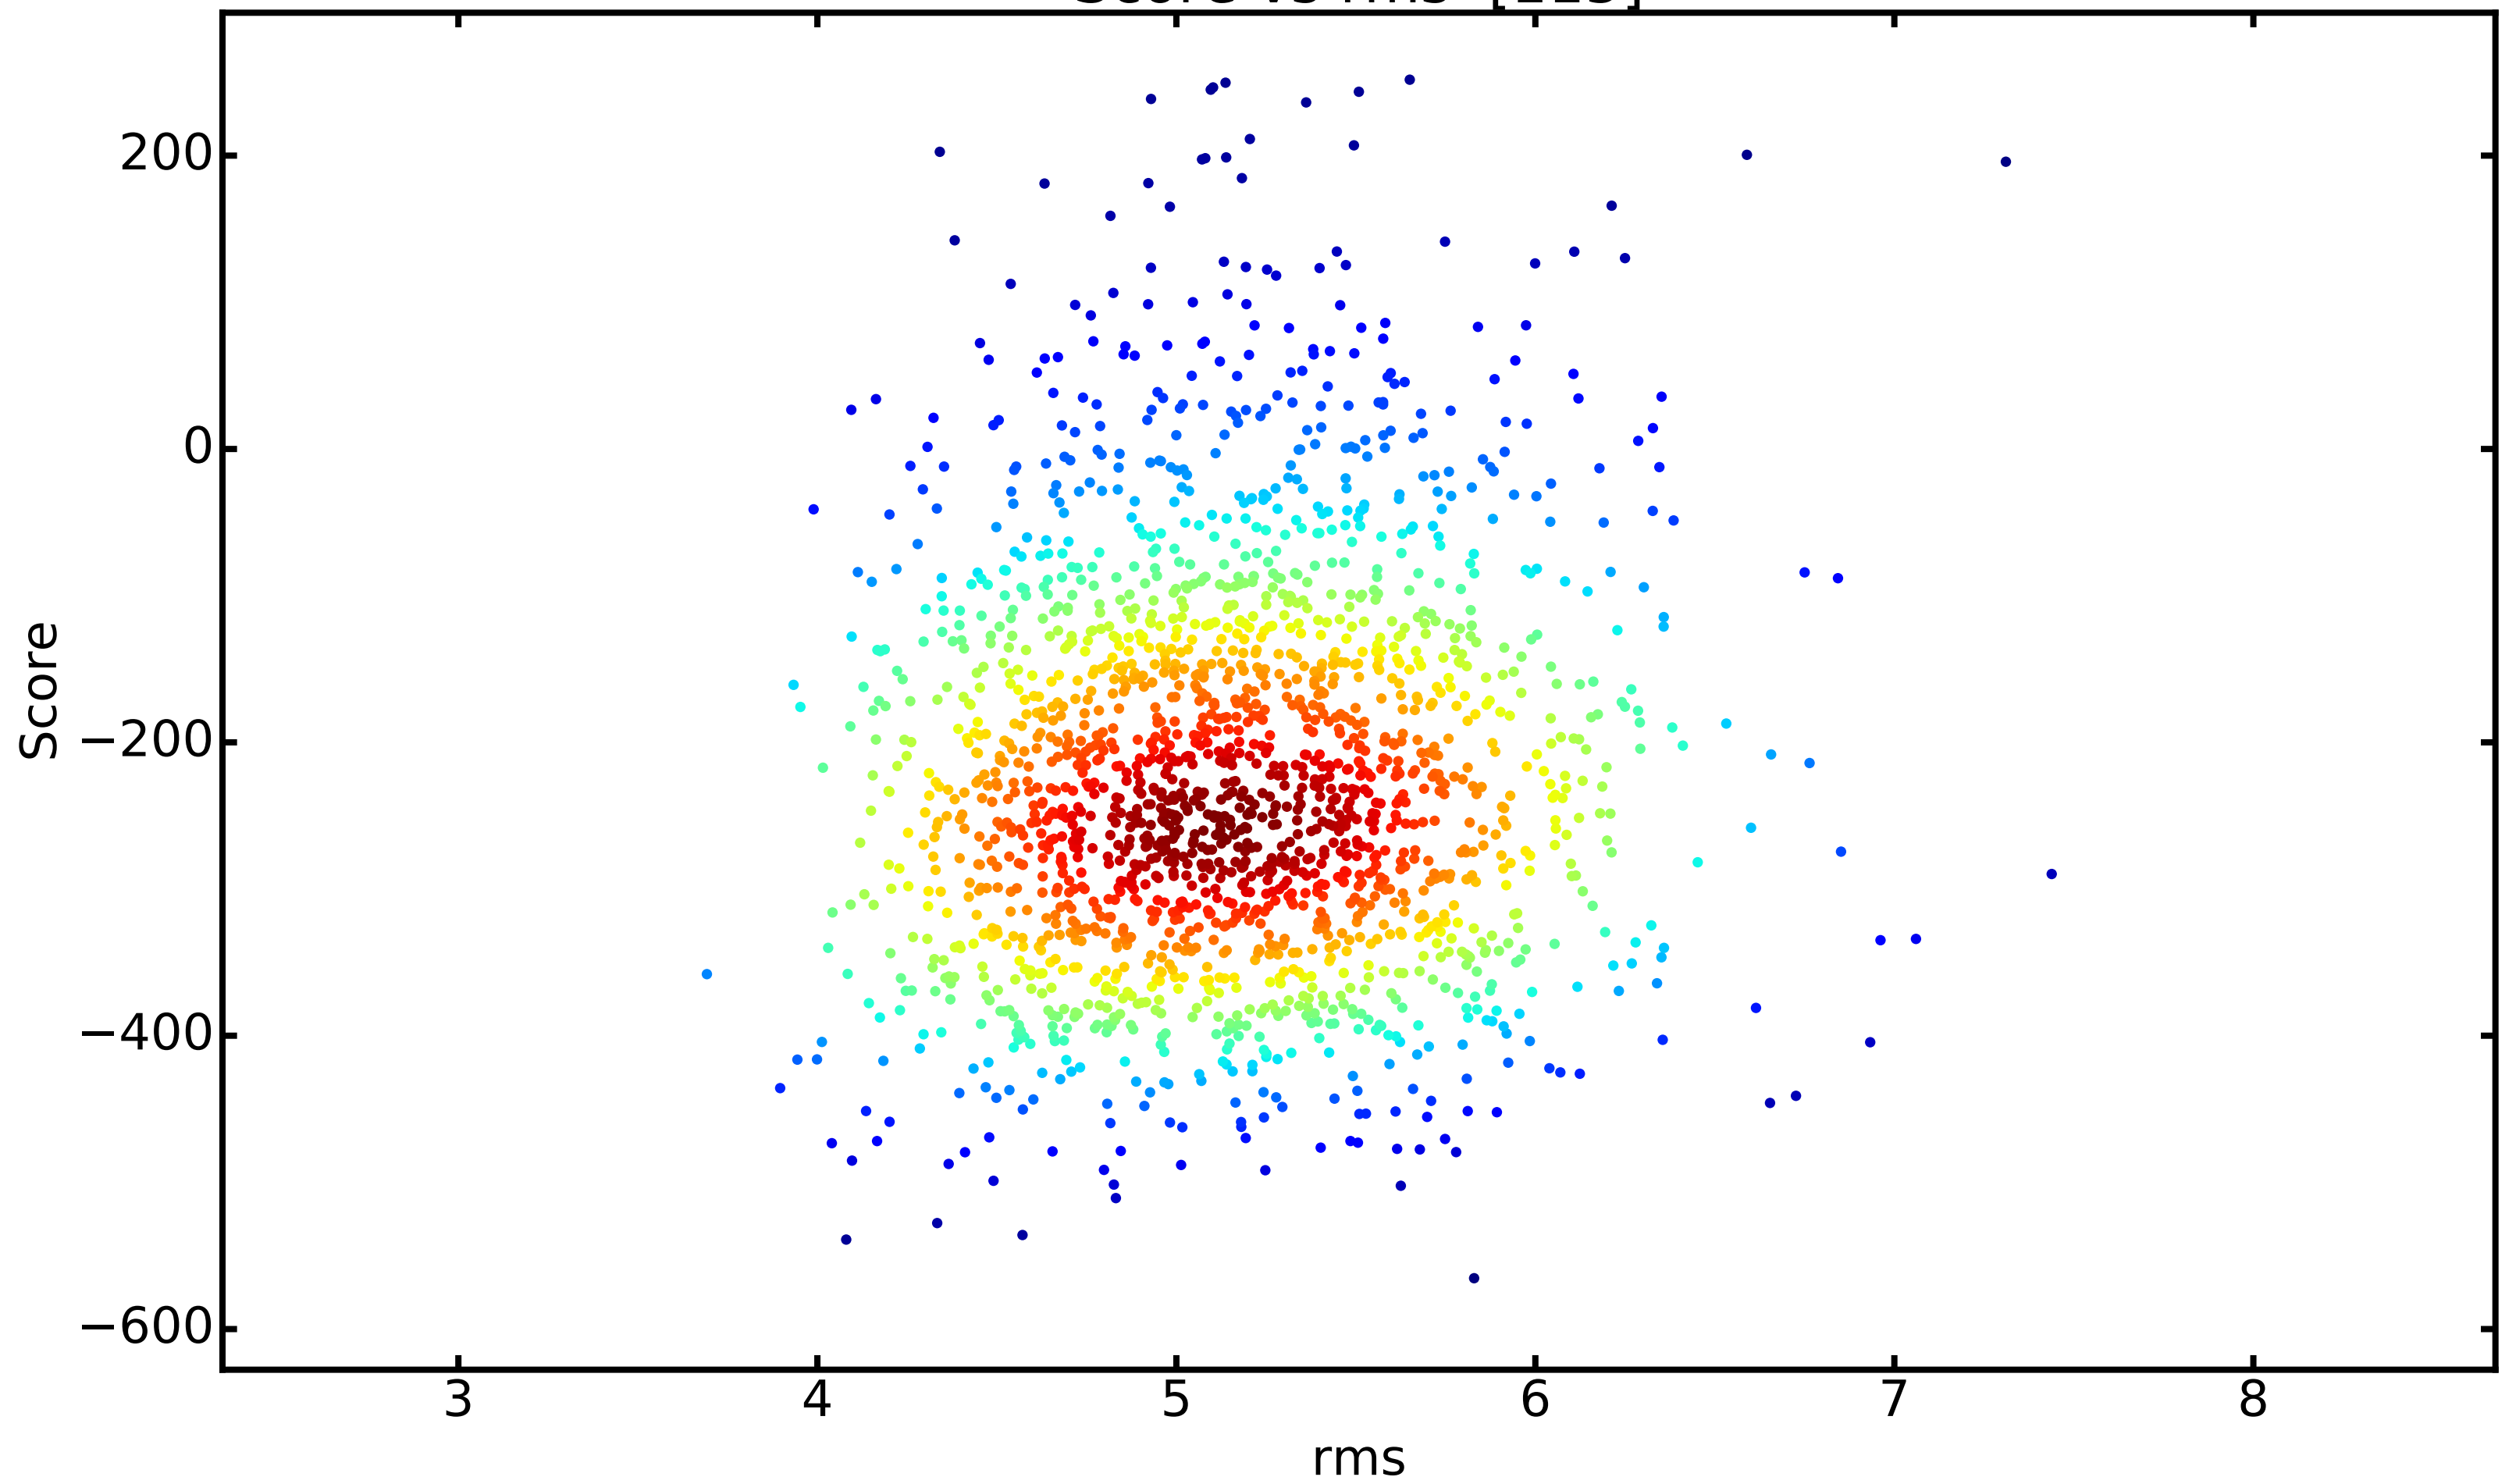

Score vs rms [133]

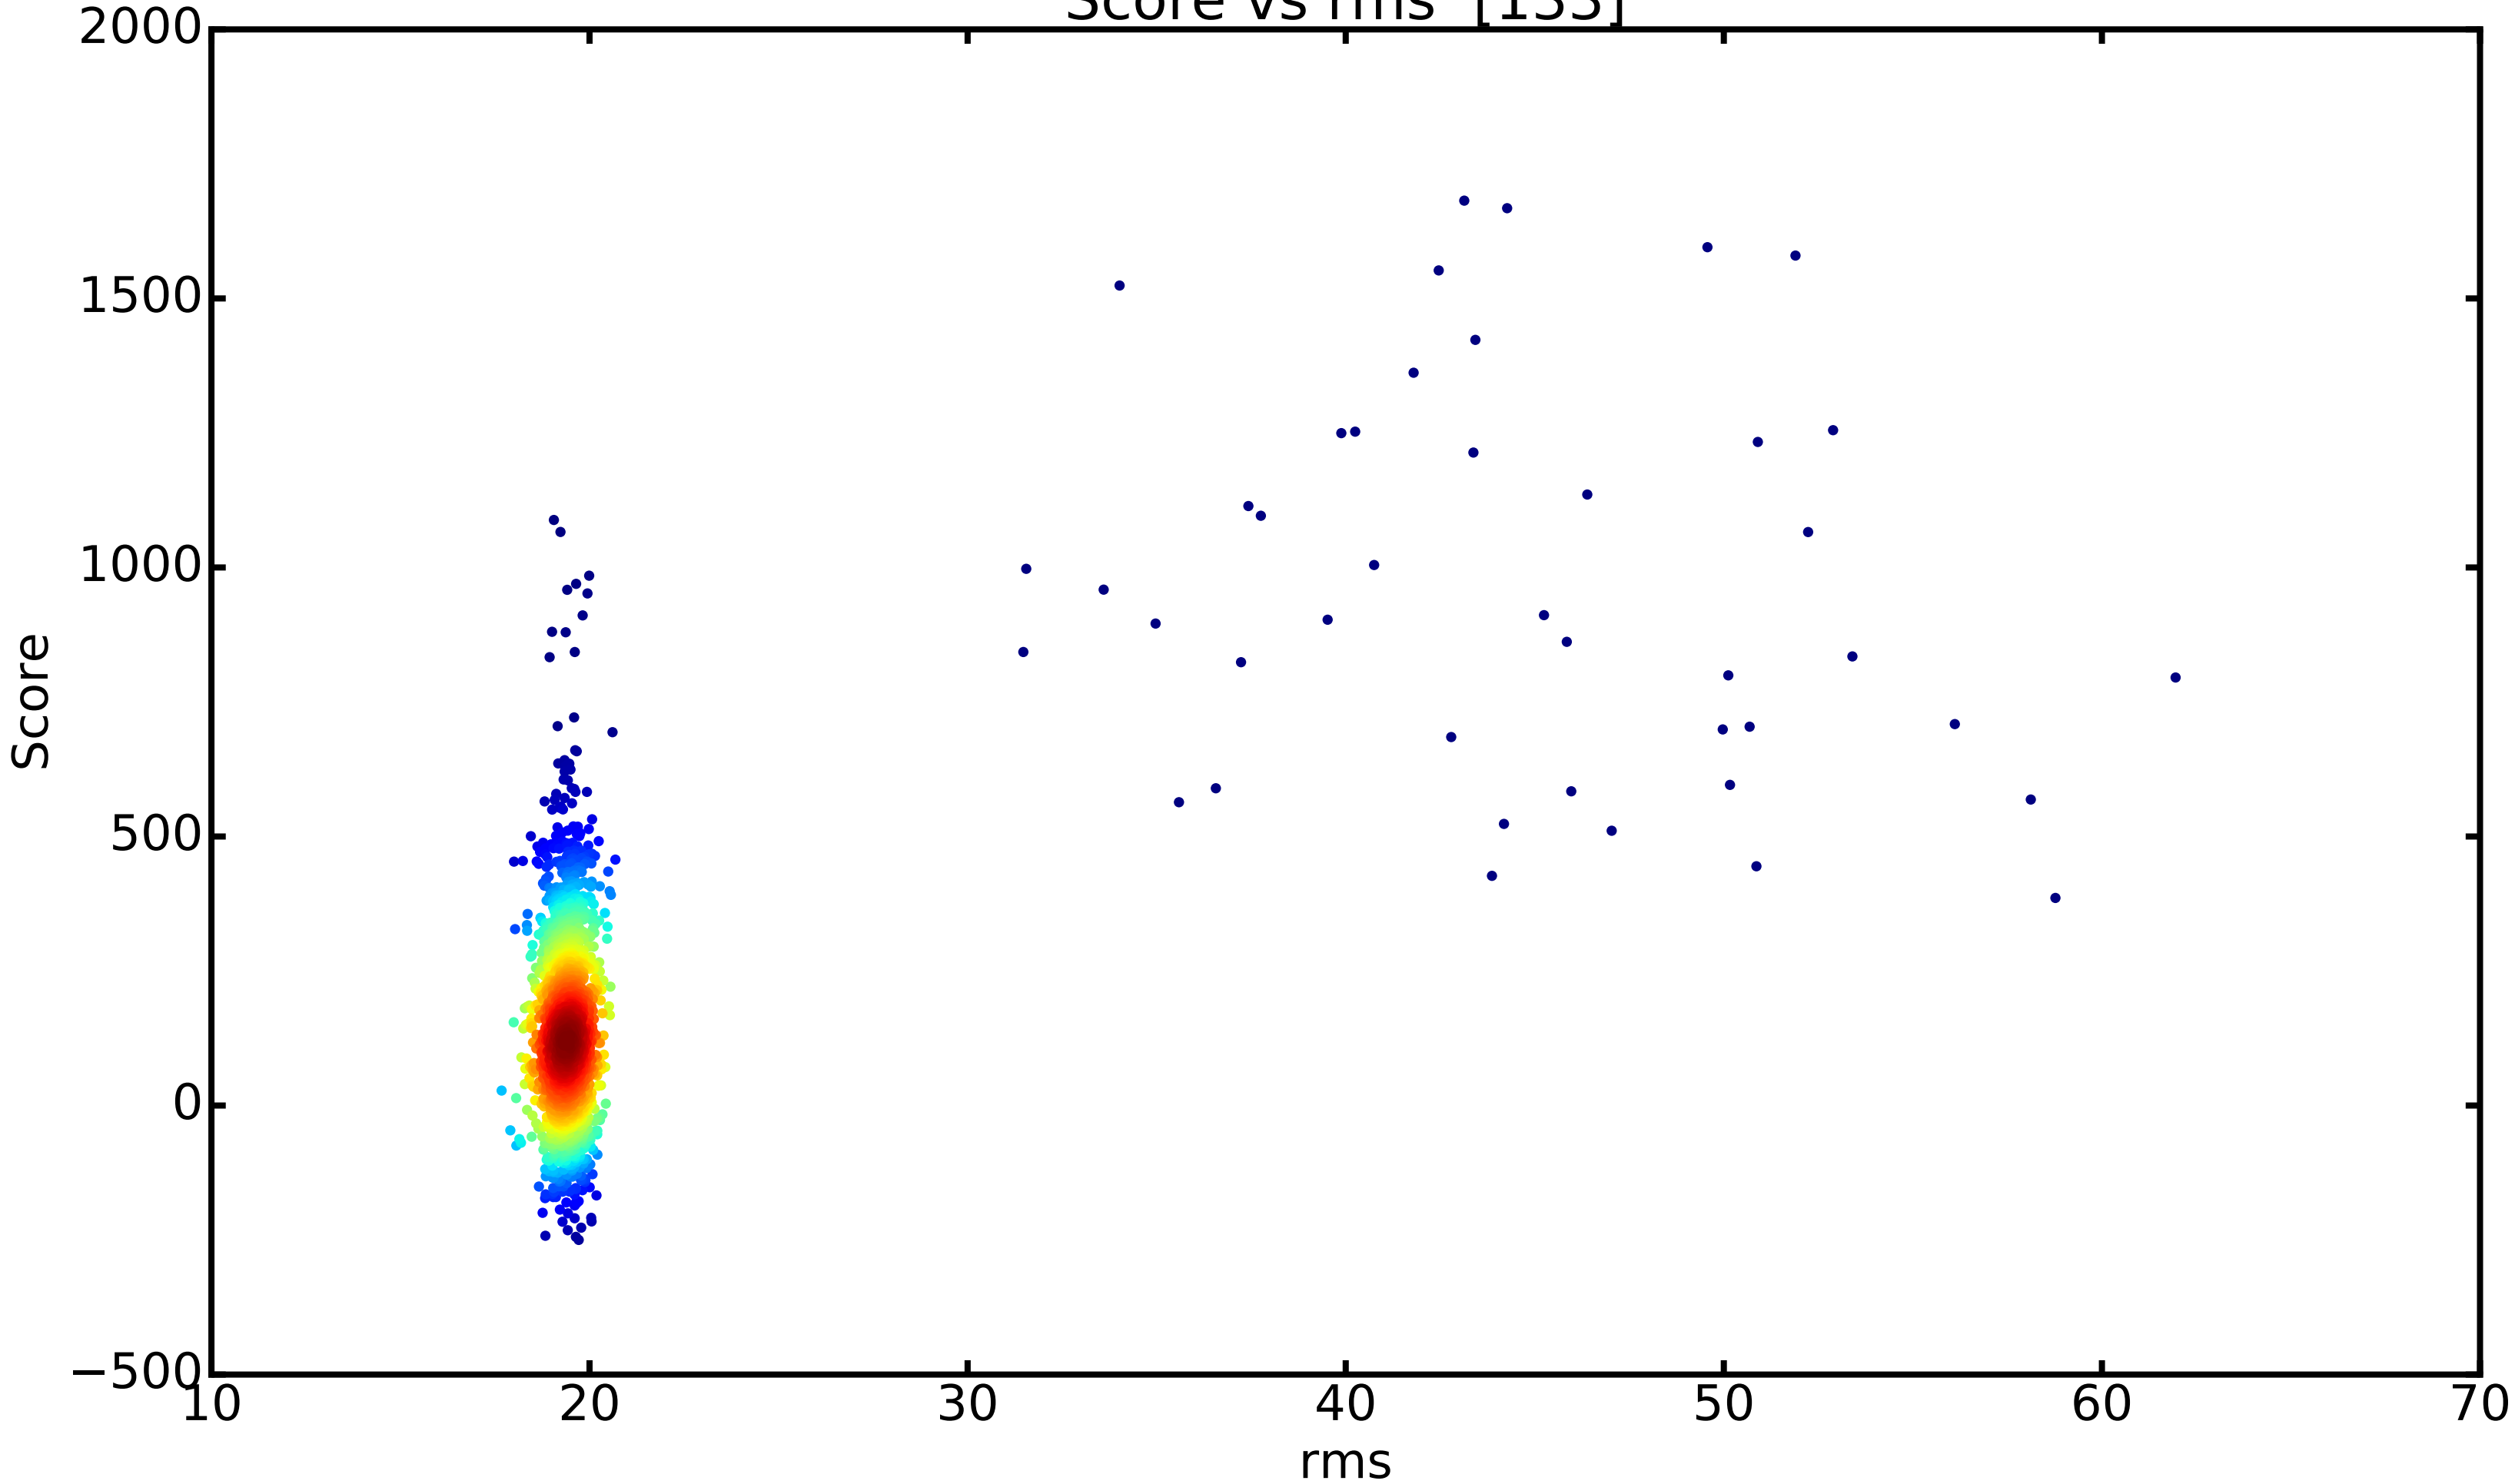

Score vs rms [133]

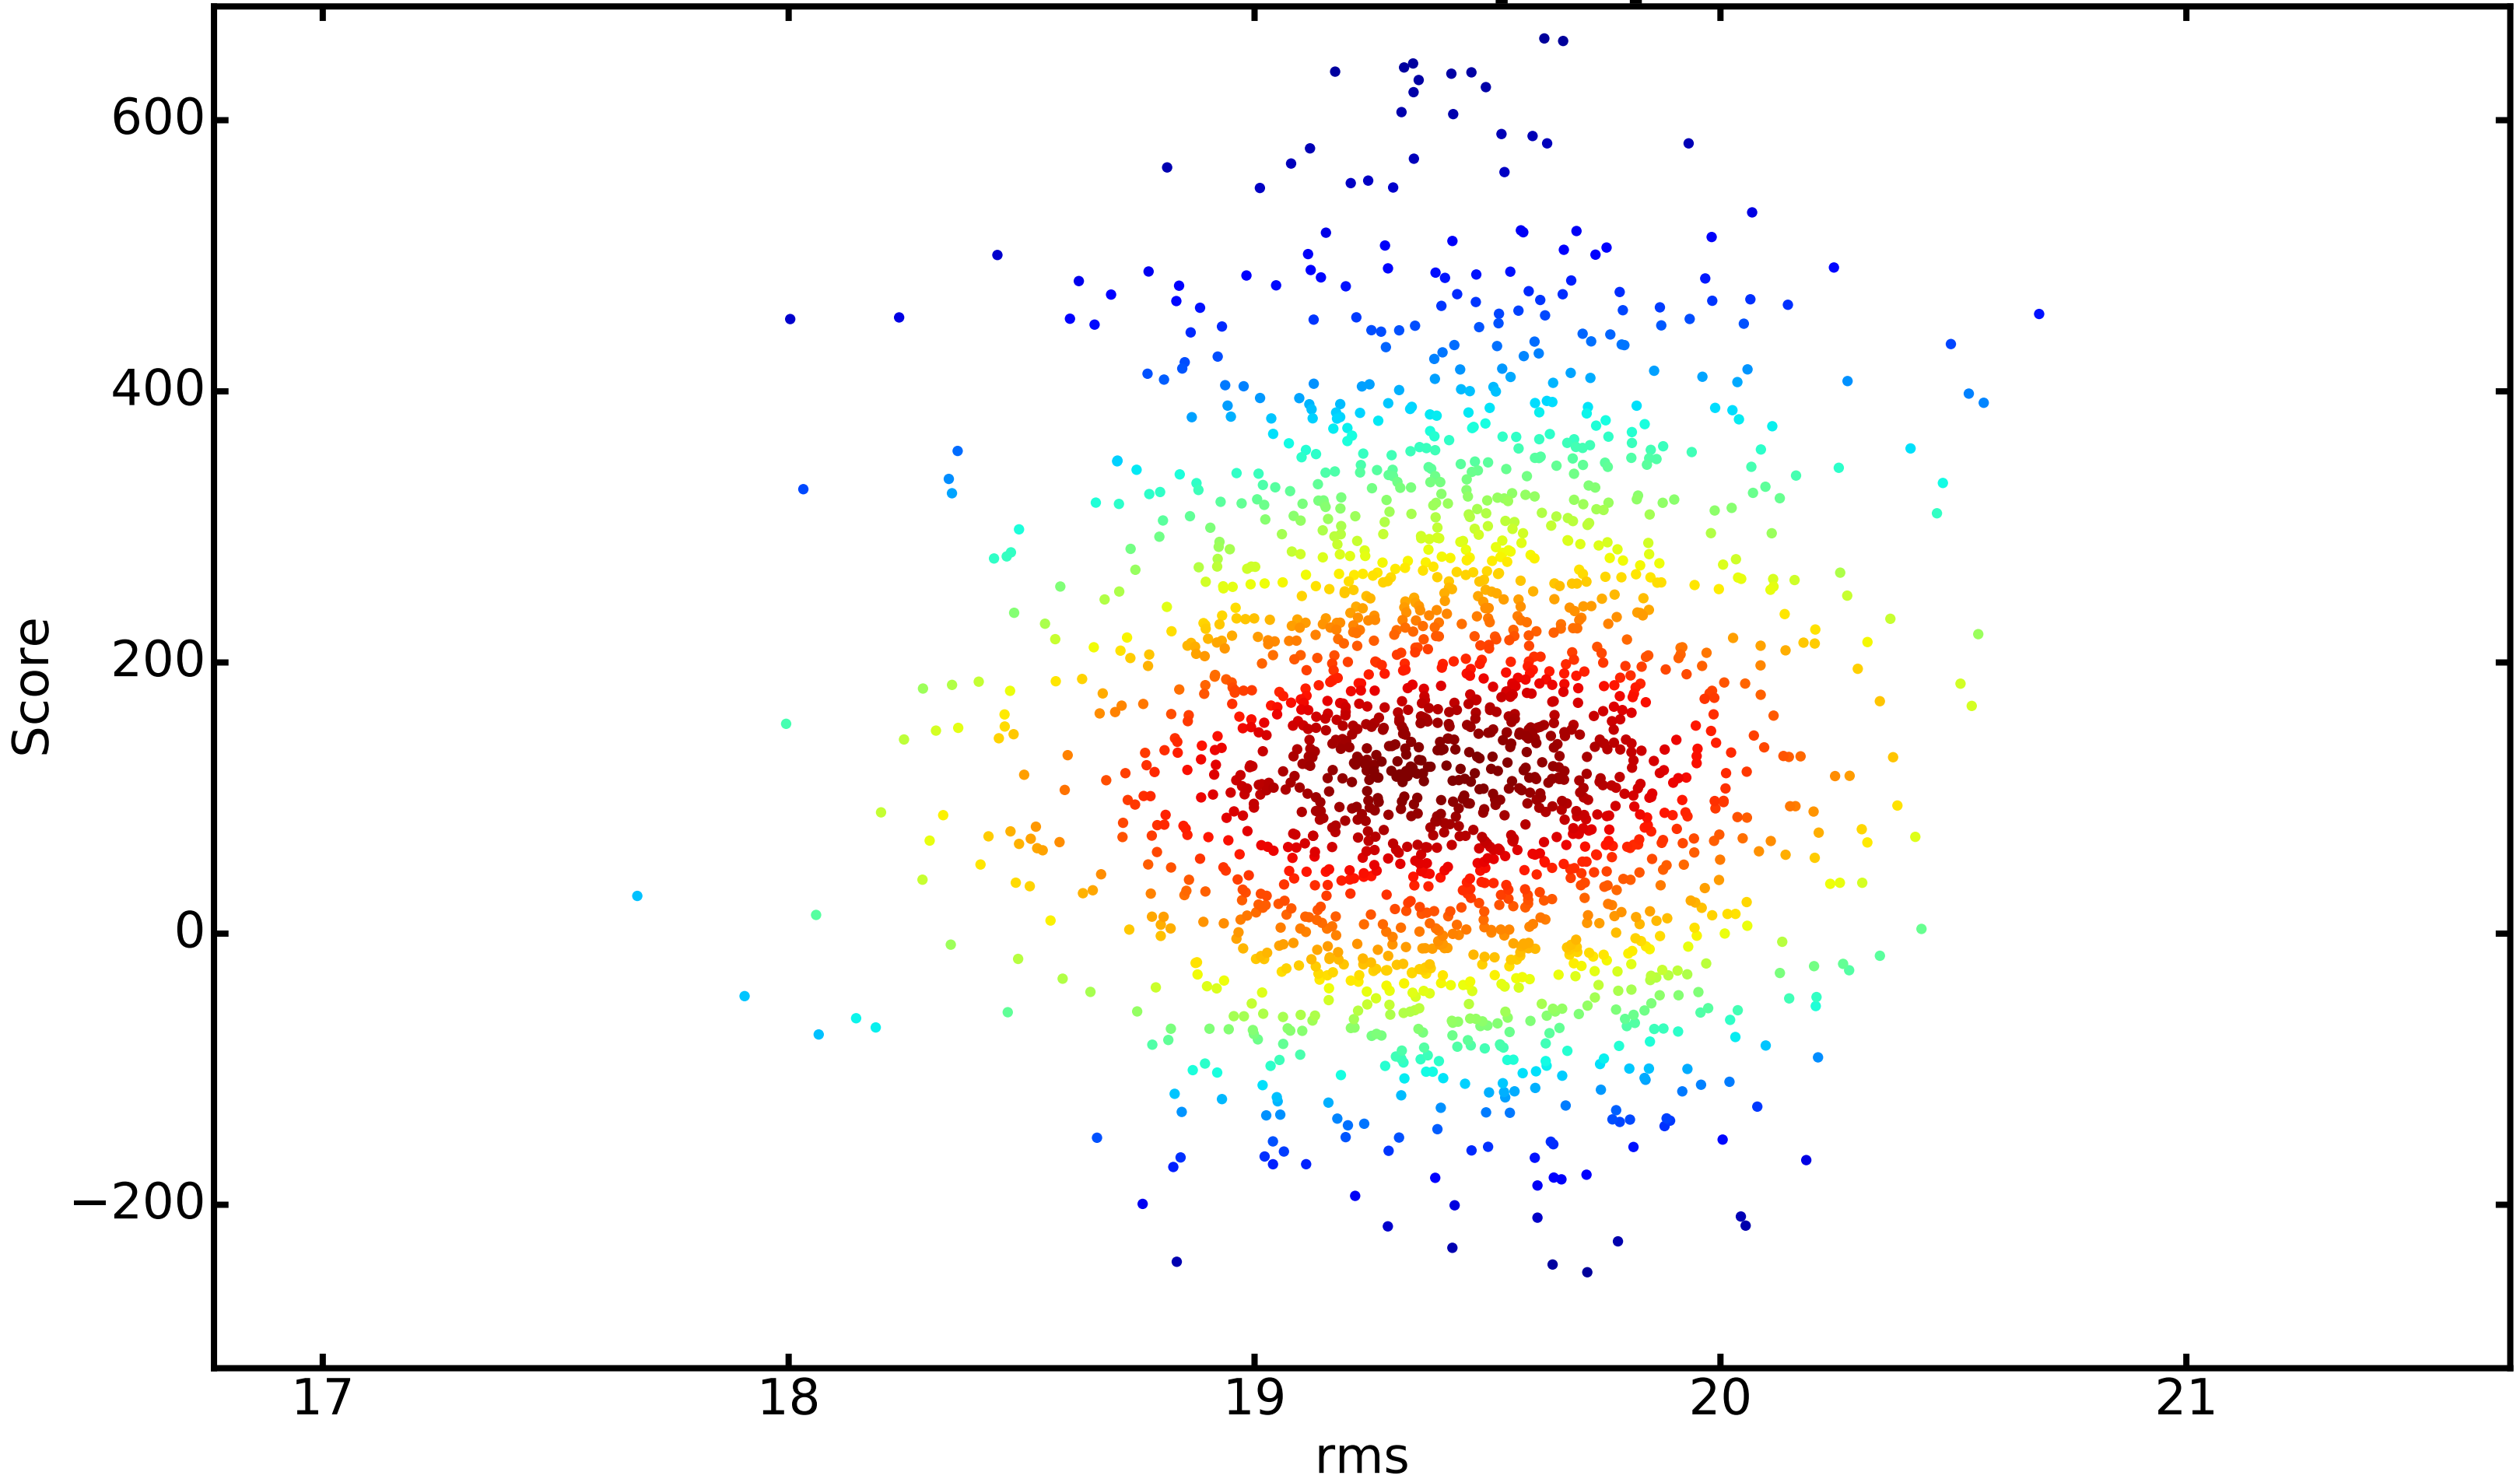



Score vs rms [135]

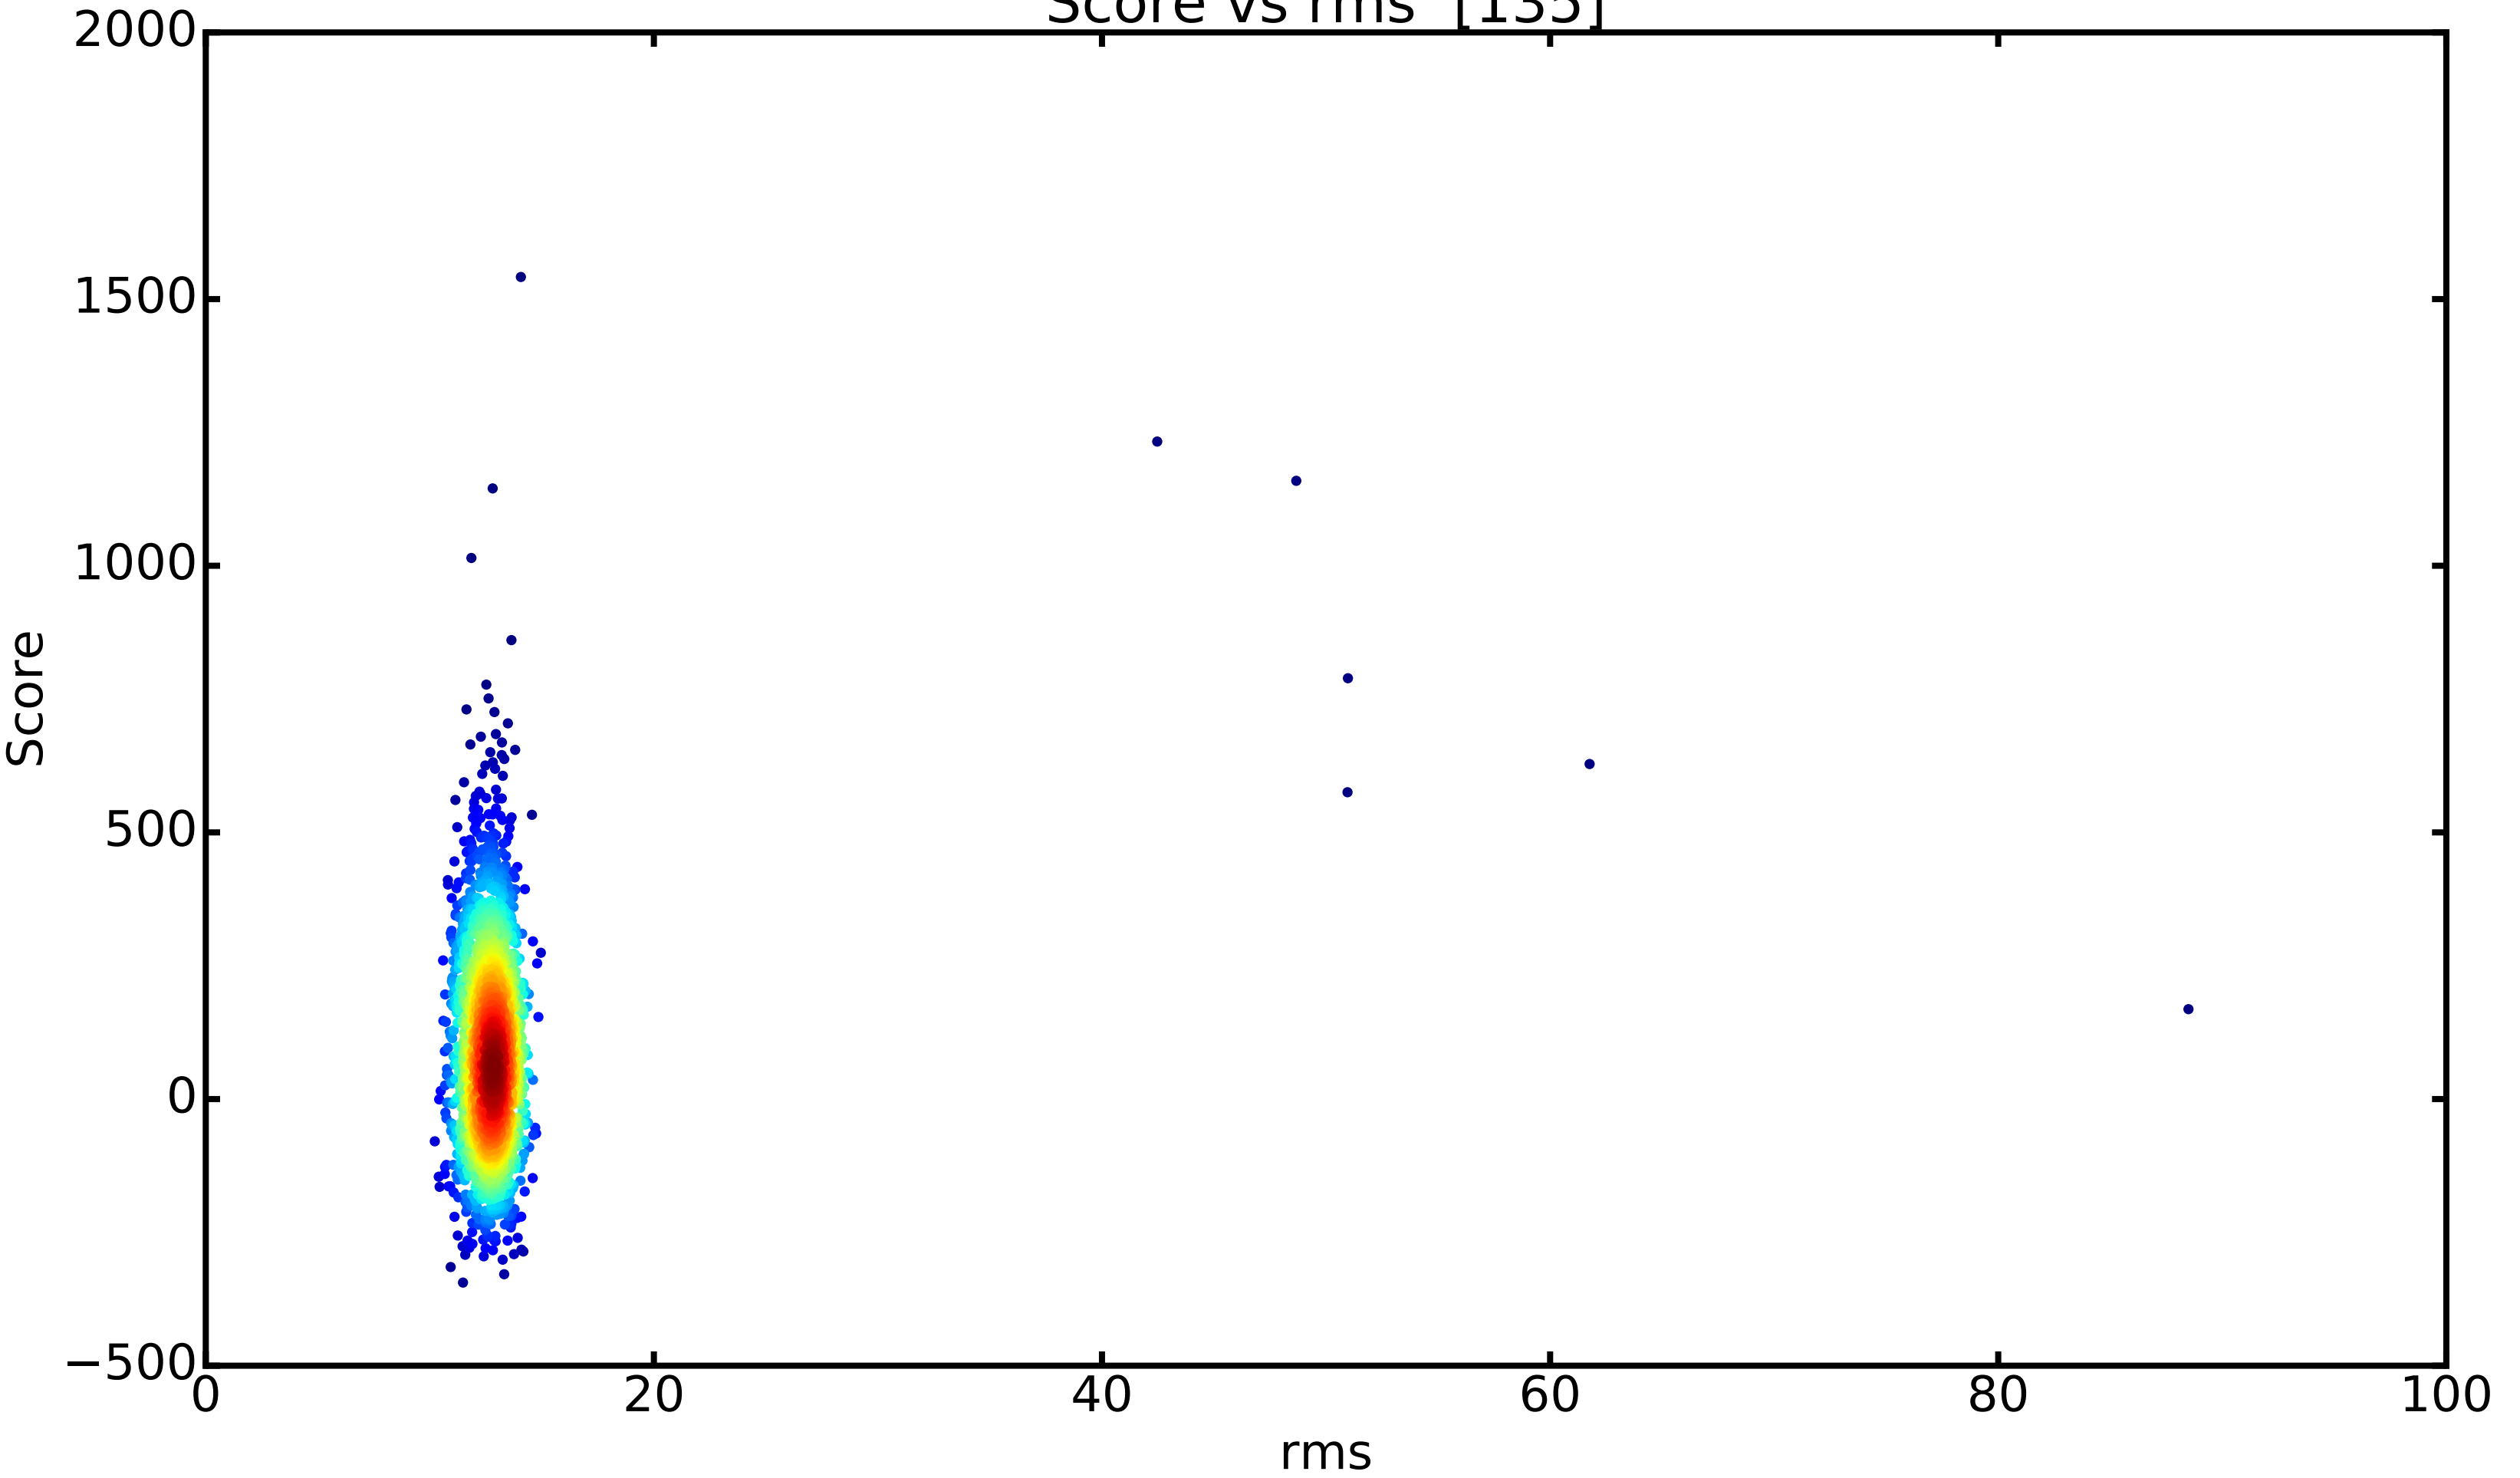

Score vs rms [135]

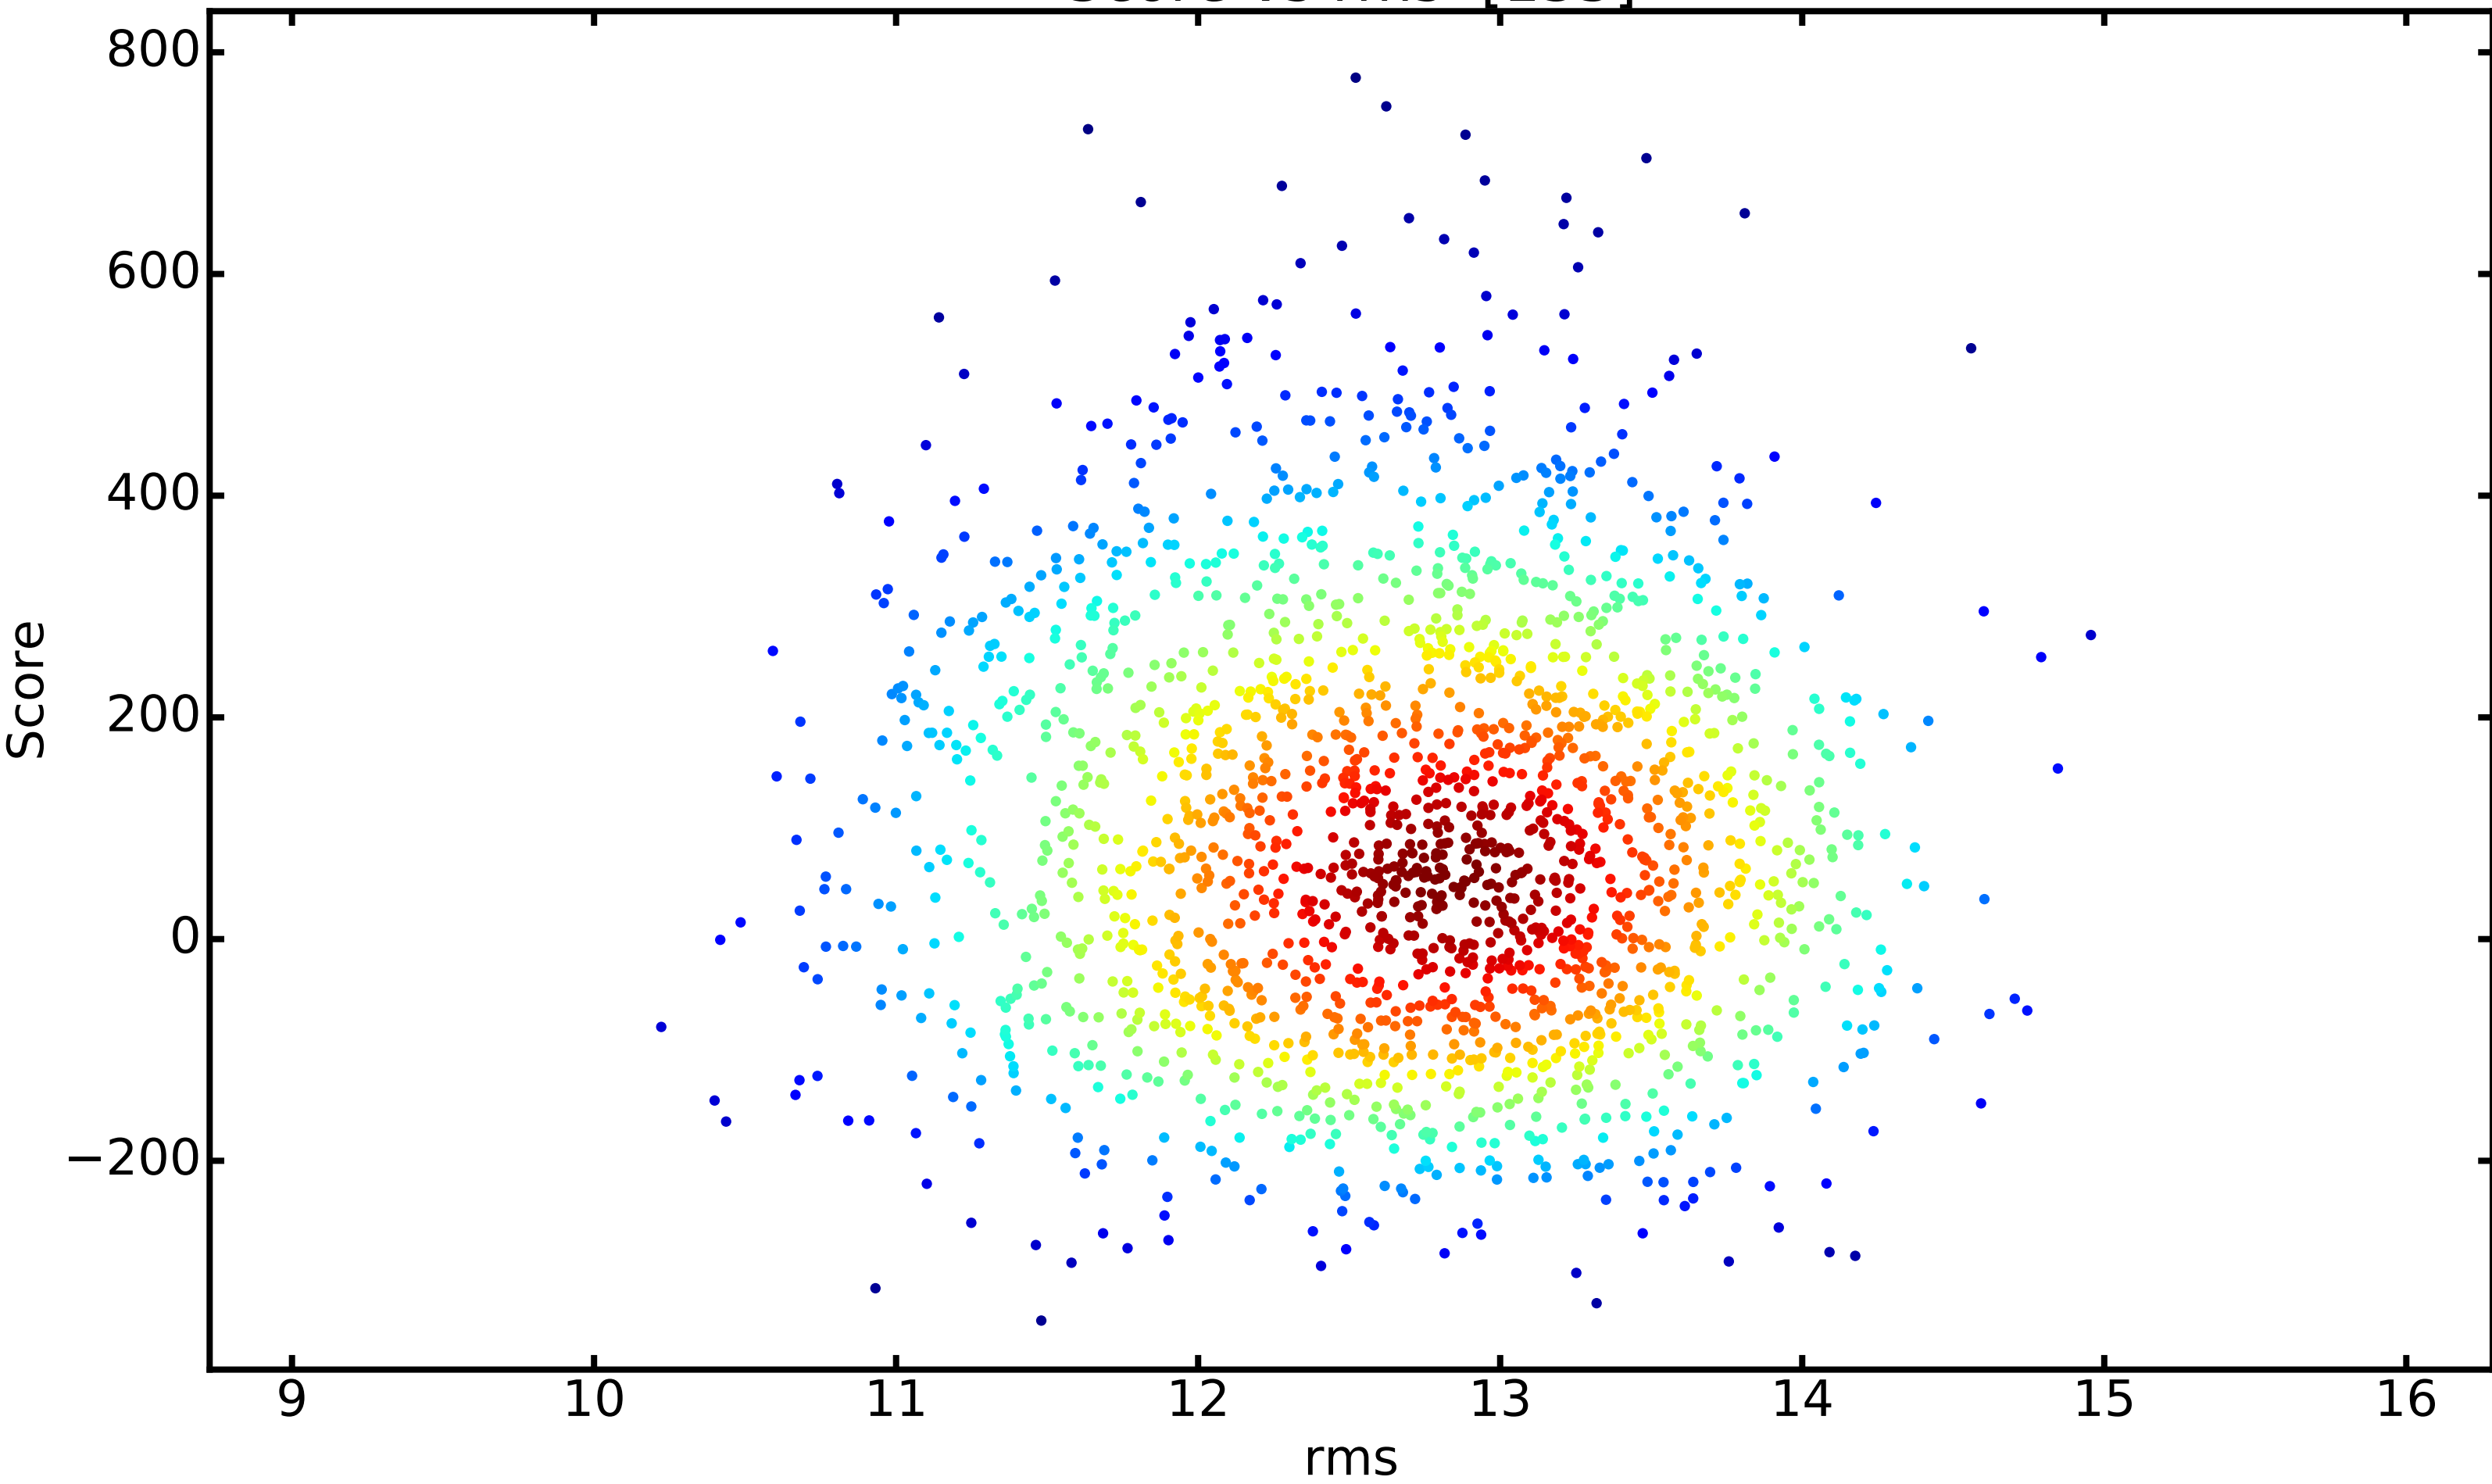

Score vs rms [161]

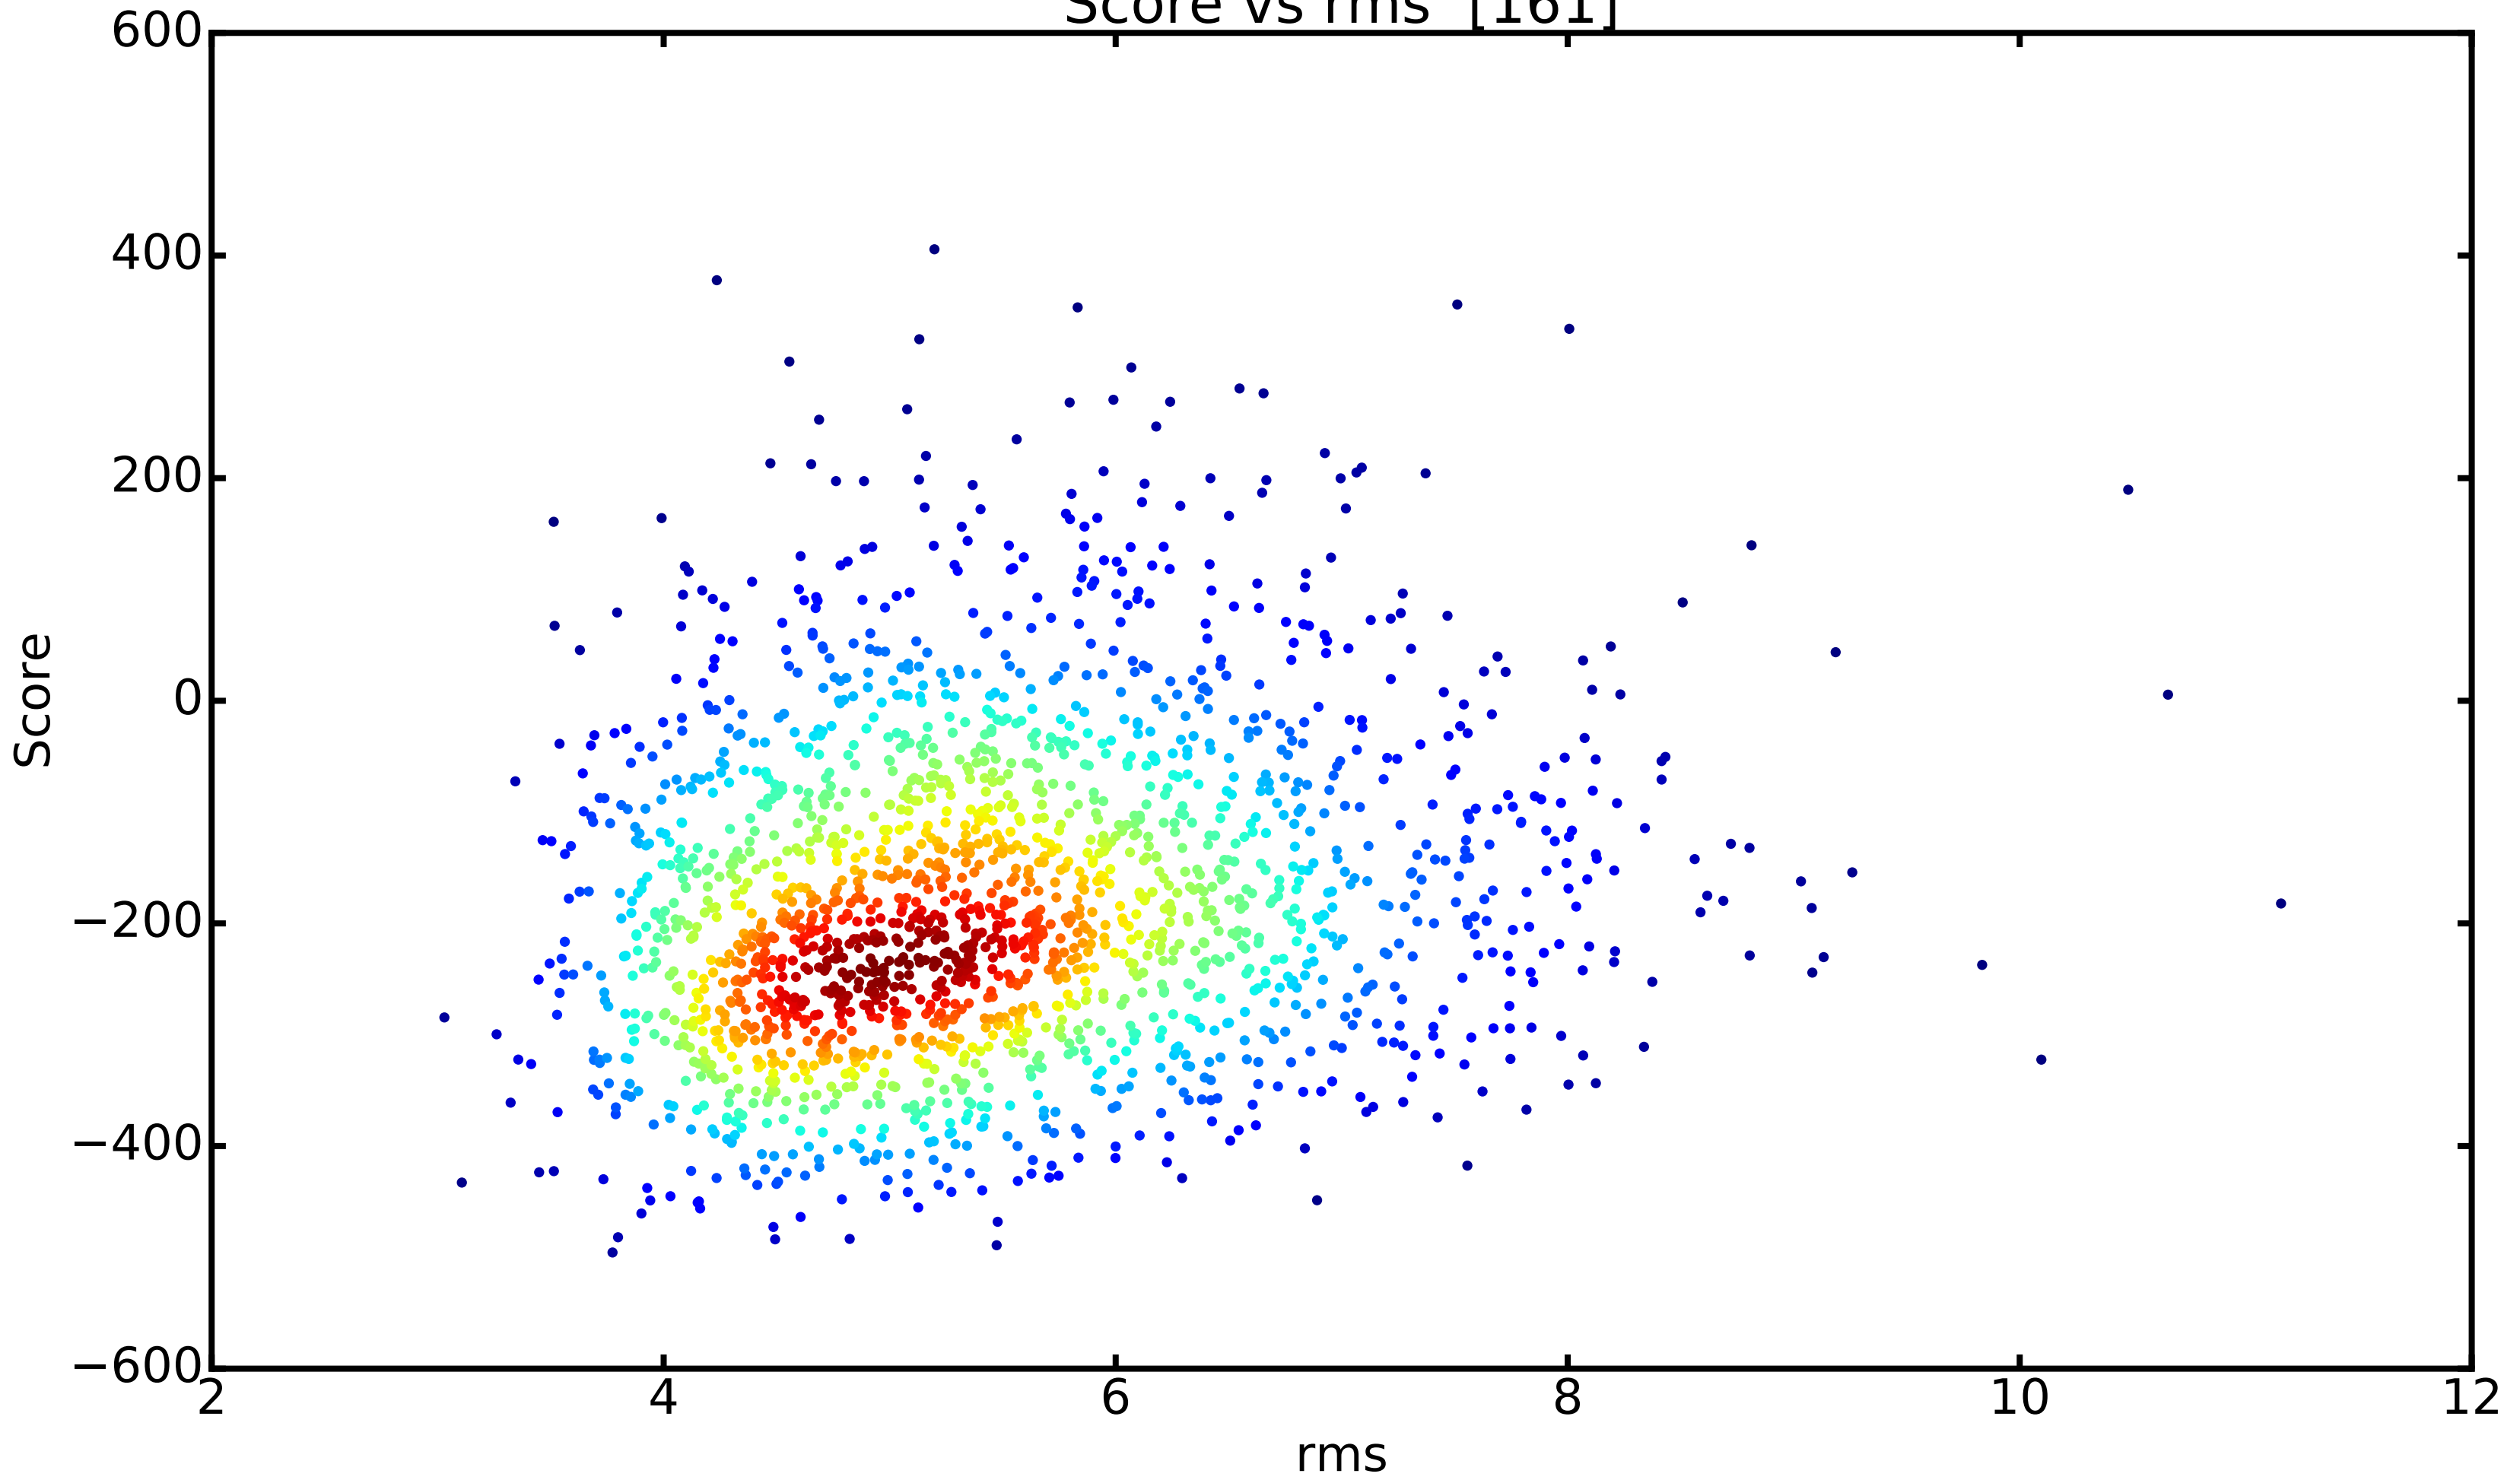

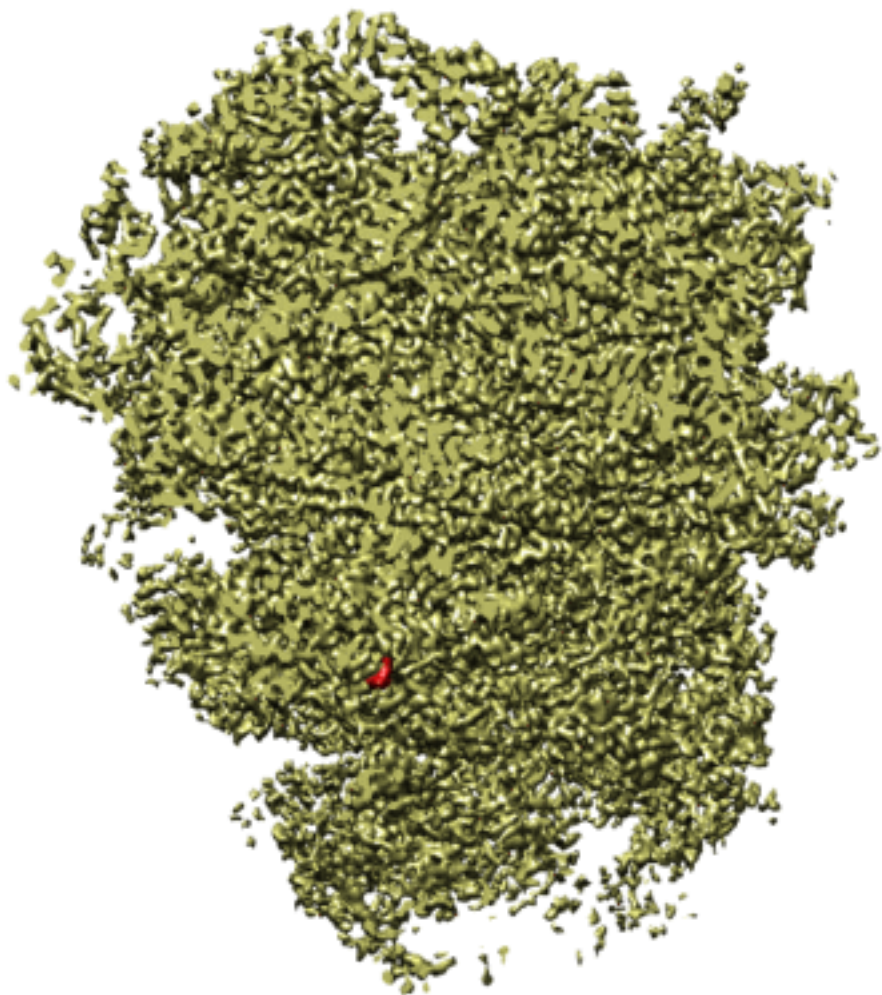

Score vs rms [114]

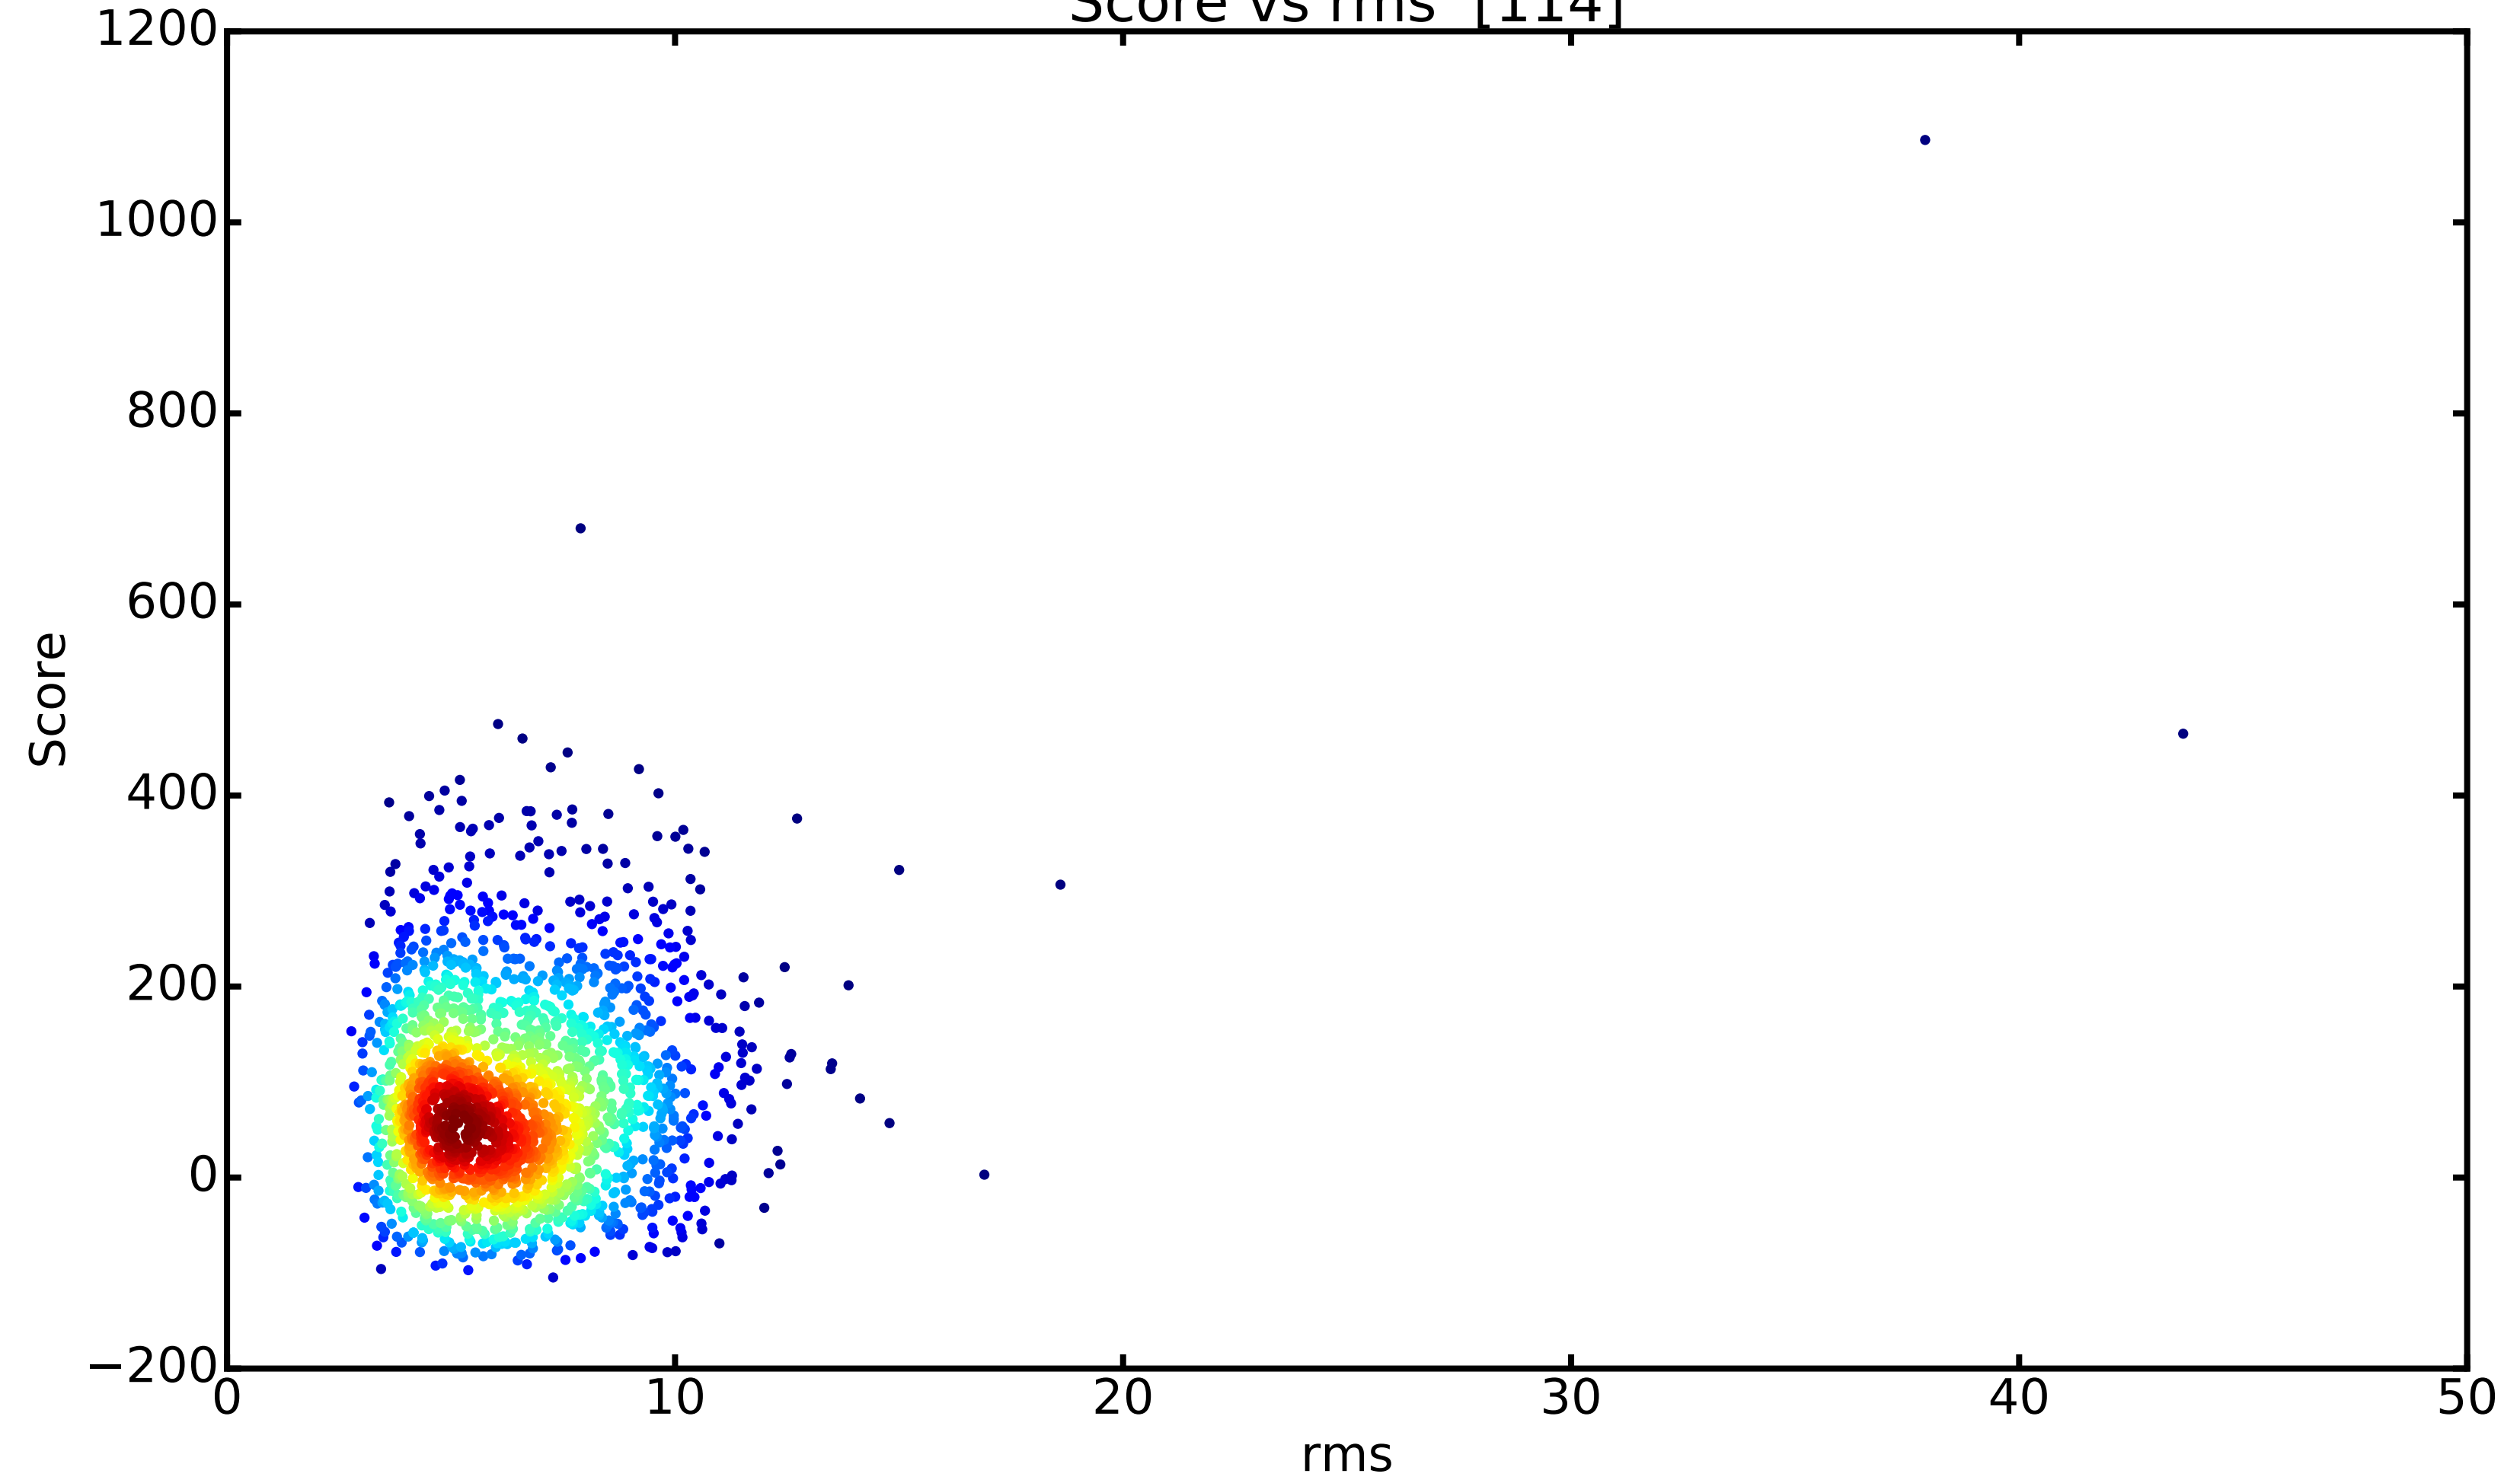

Score vs rms [114]

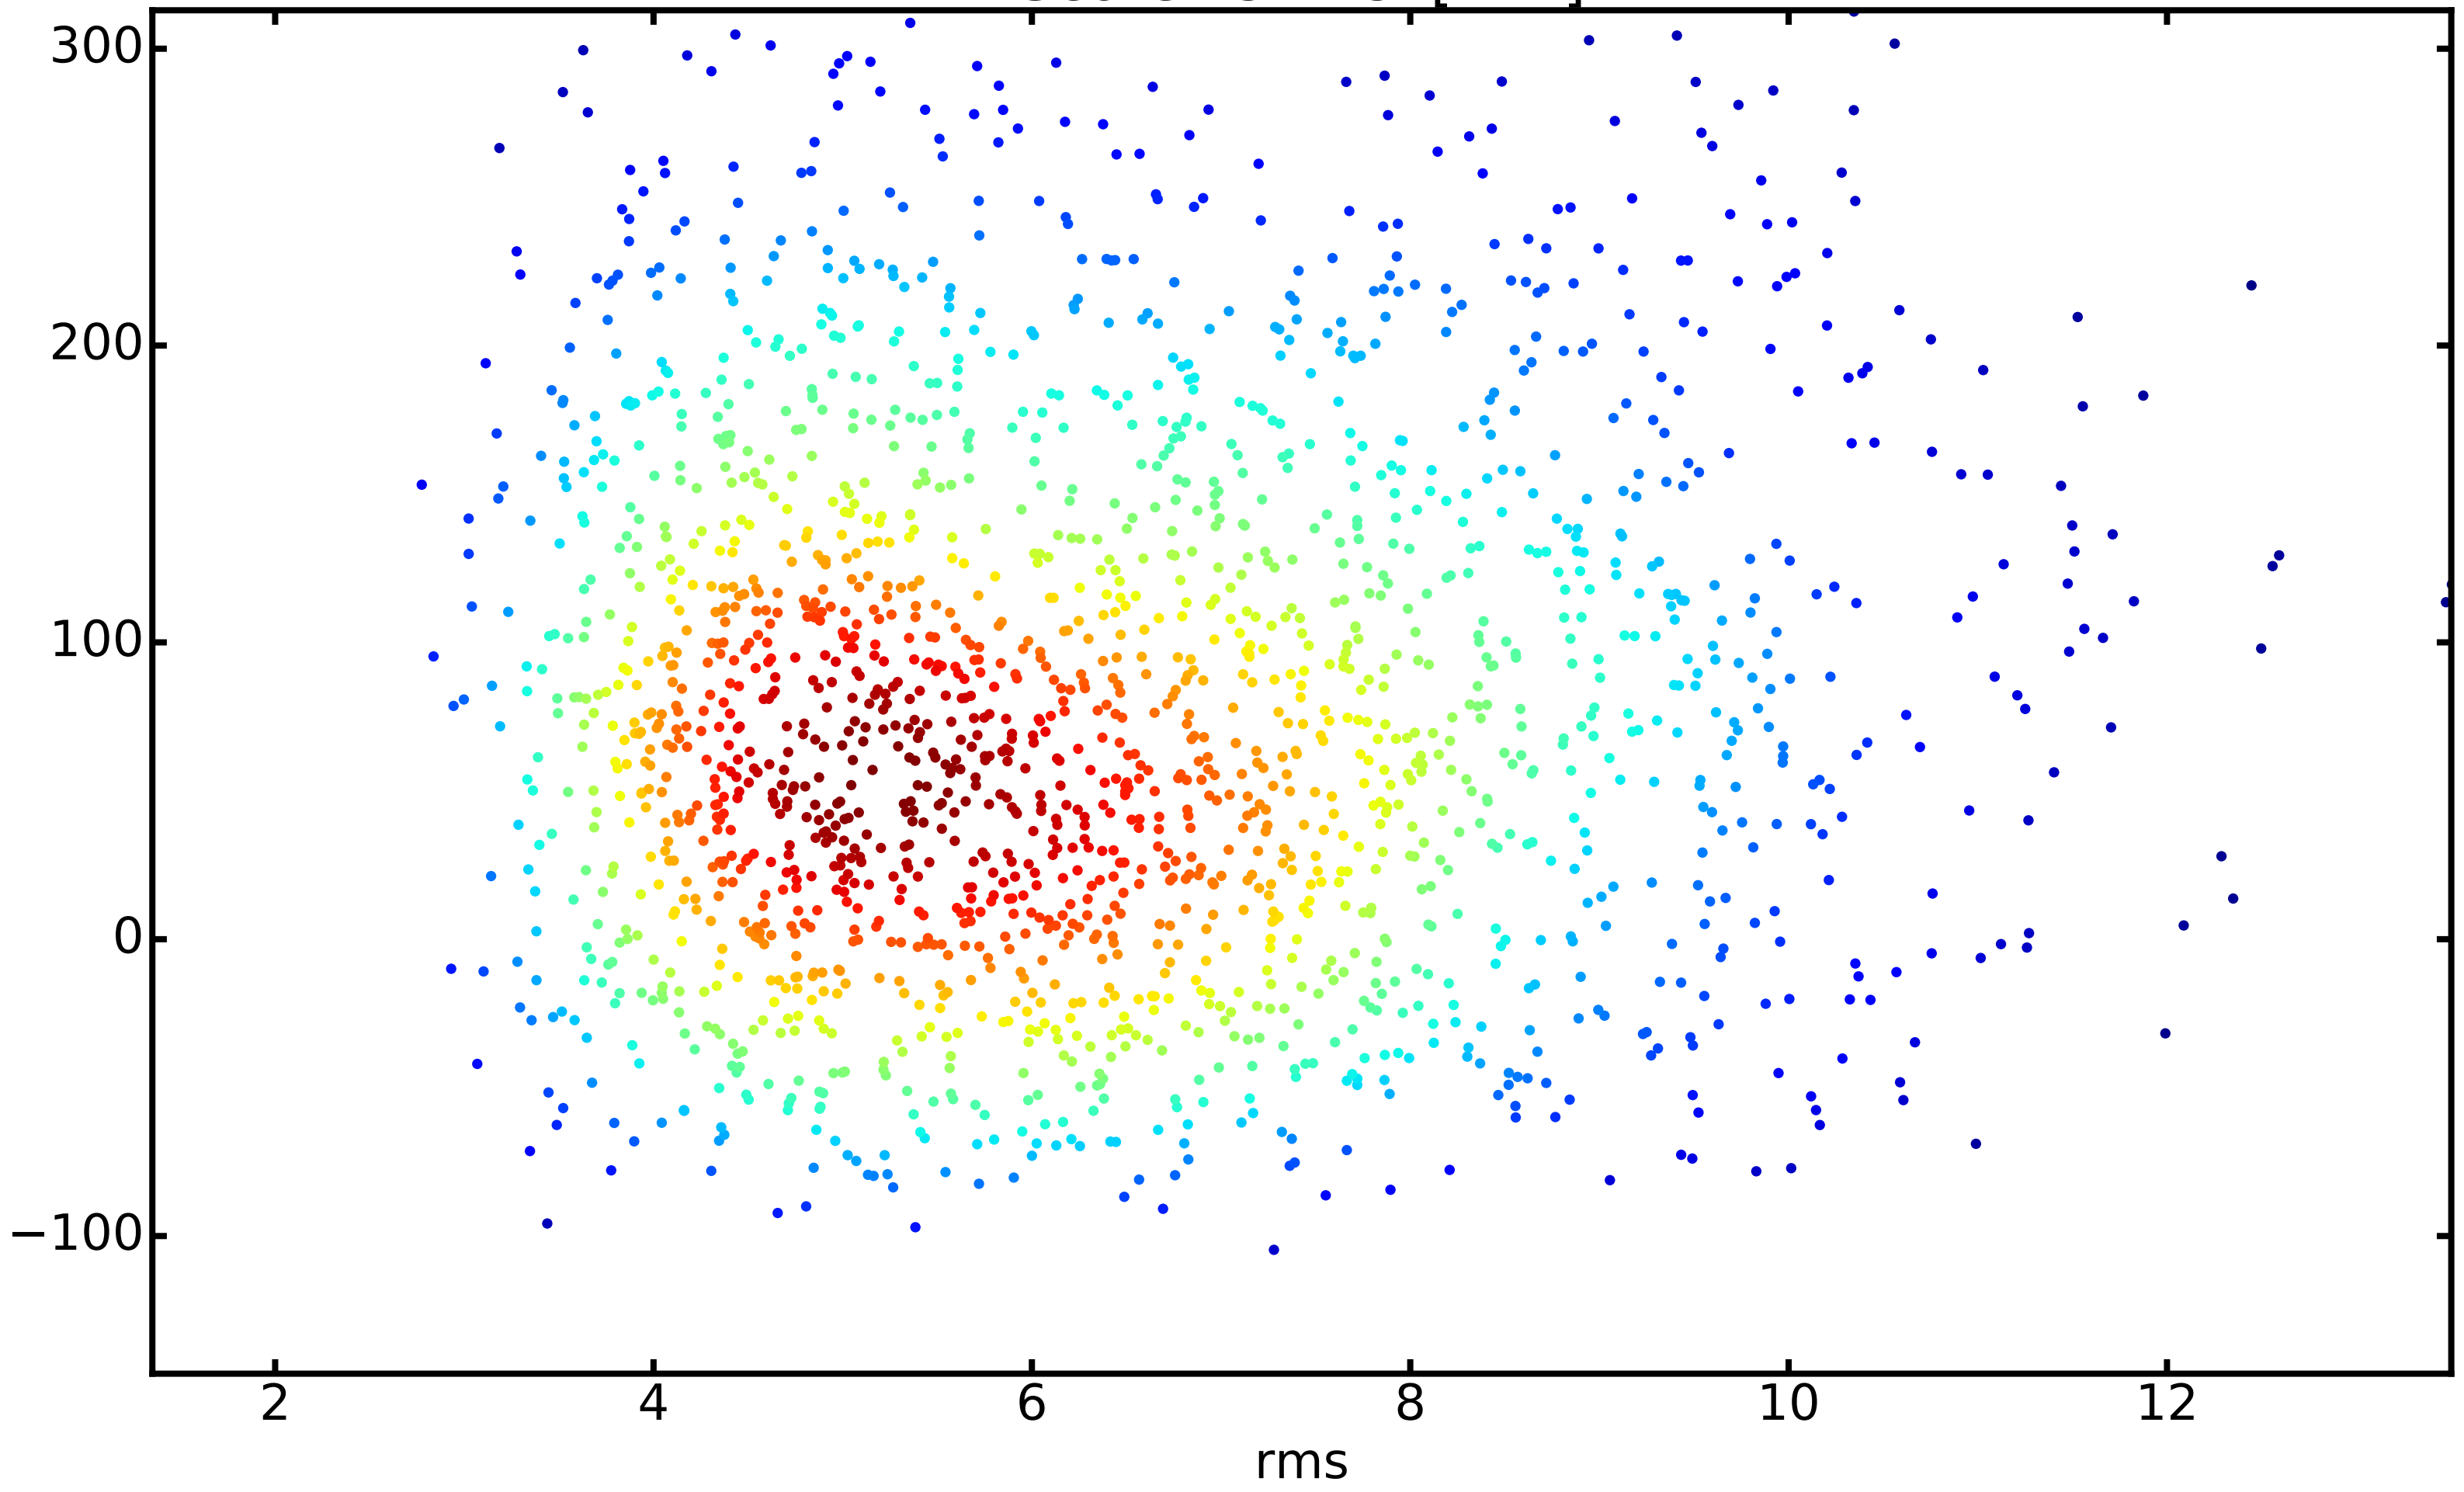

Score vs rms [119]

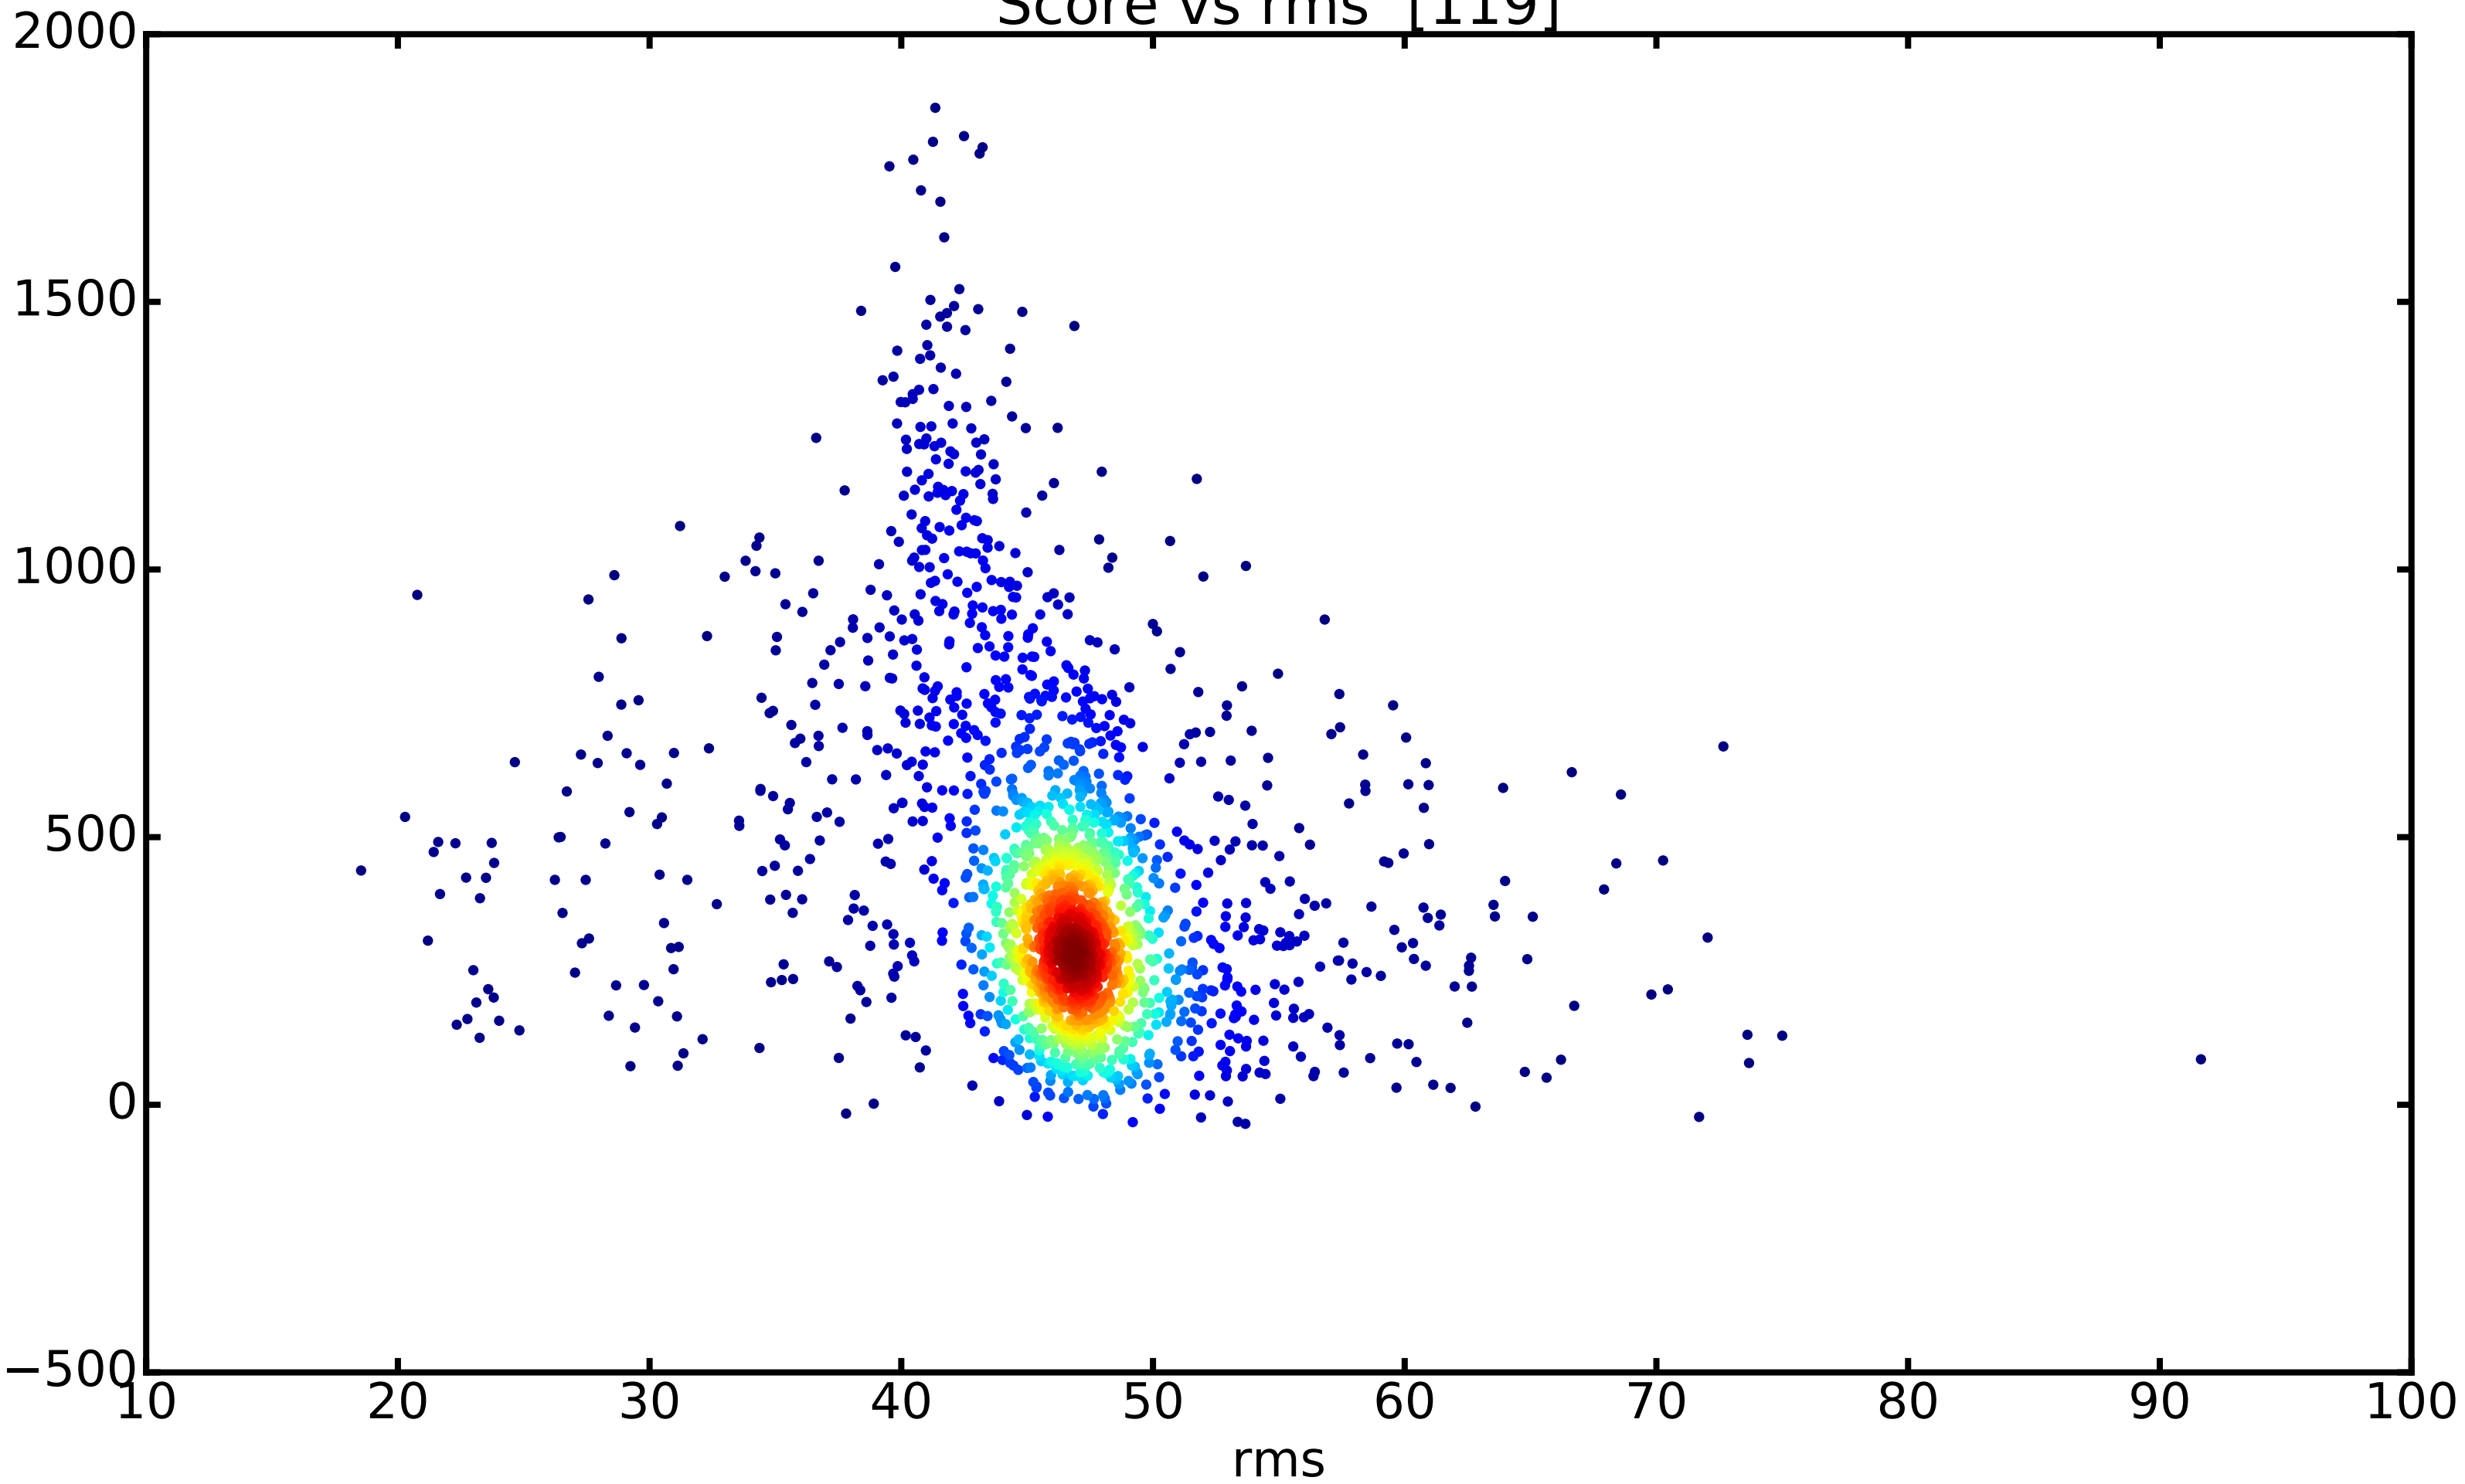

Score vs rms [119]

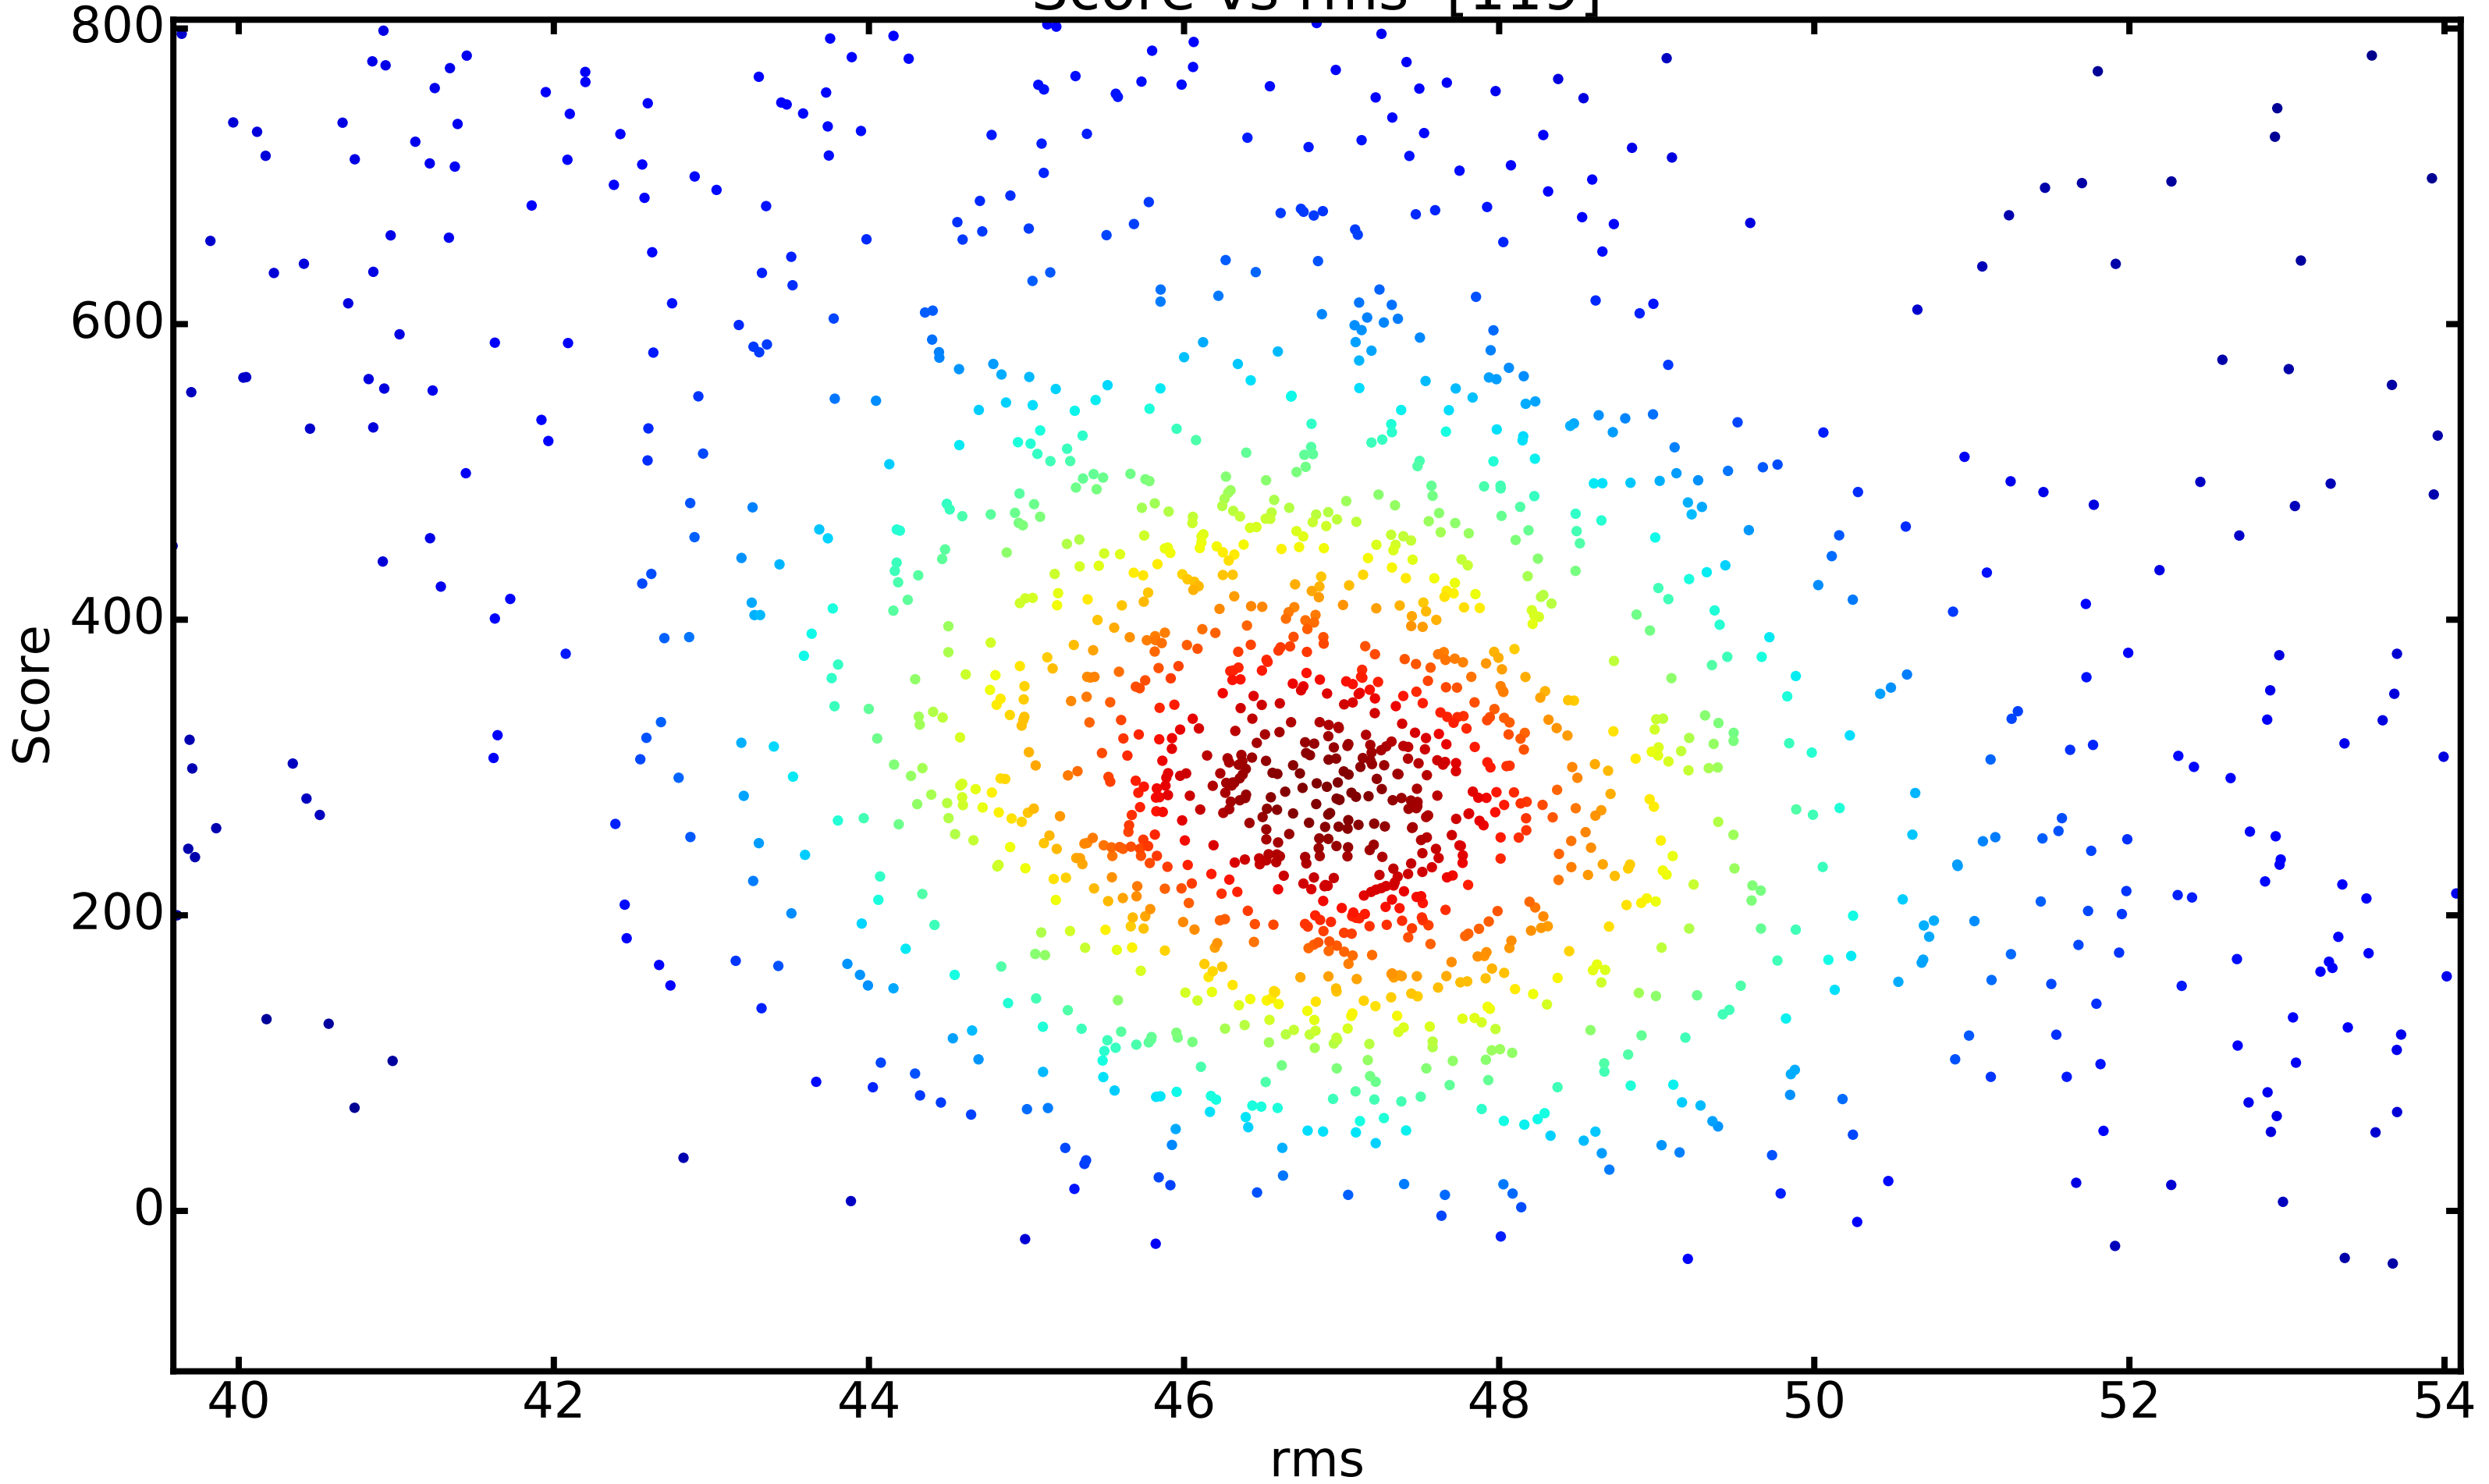



Score vs rms [123]

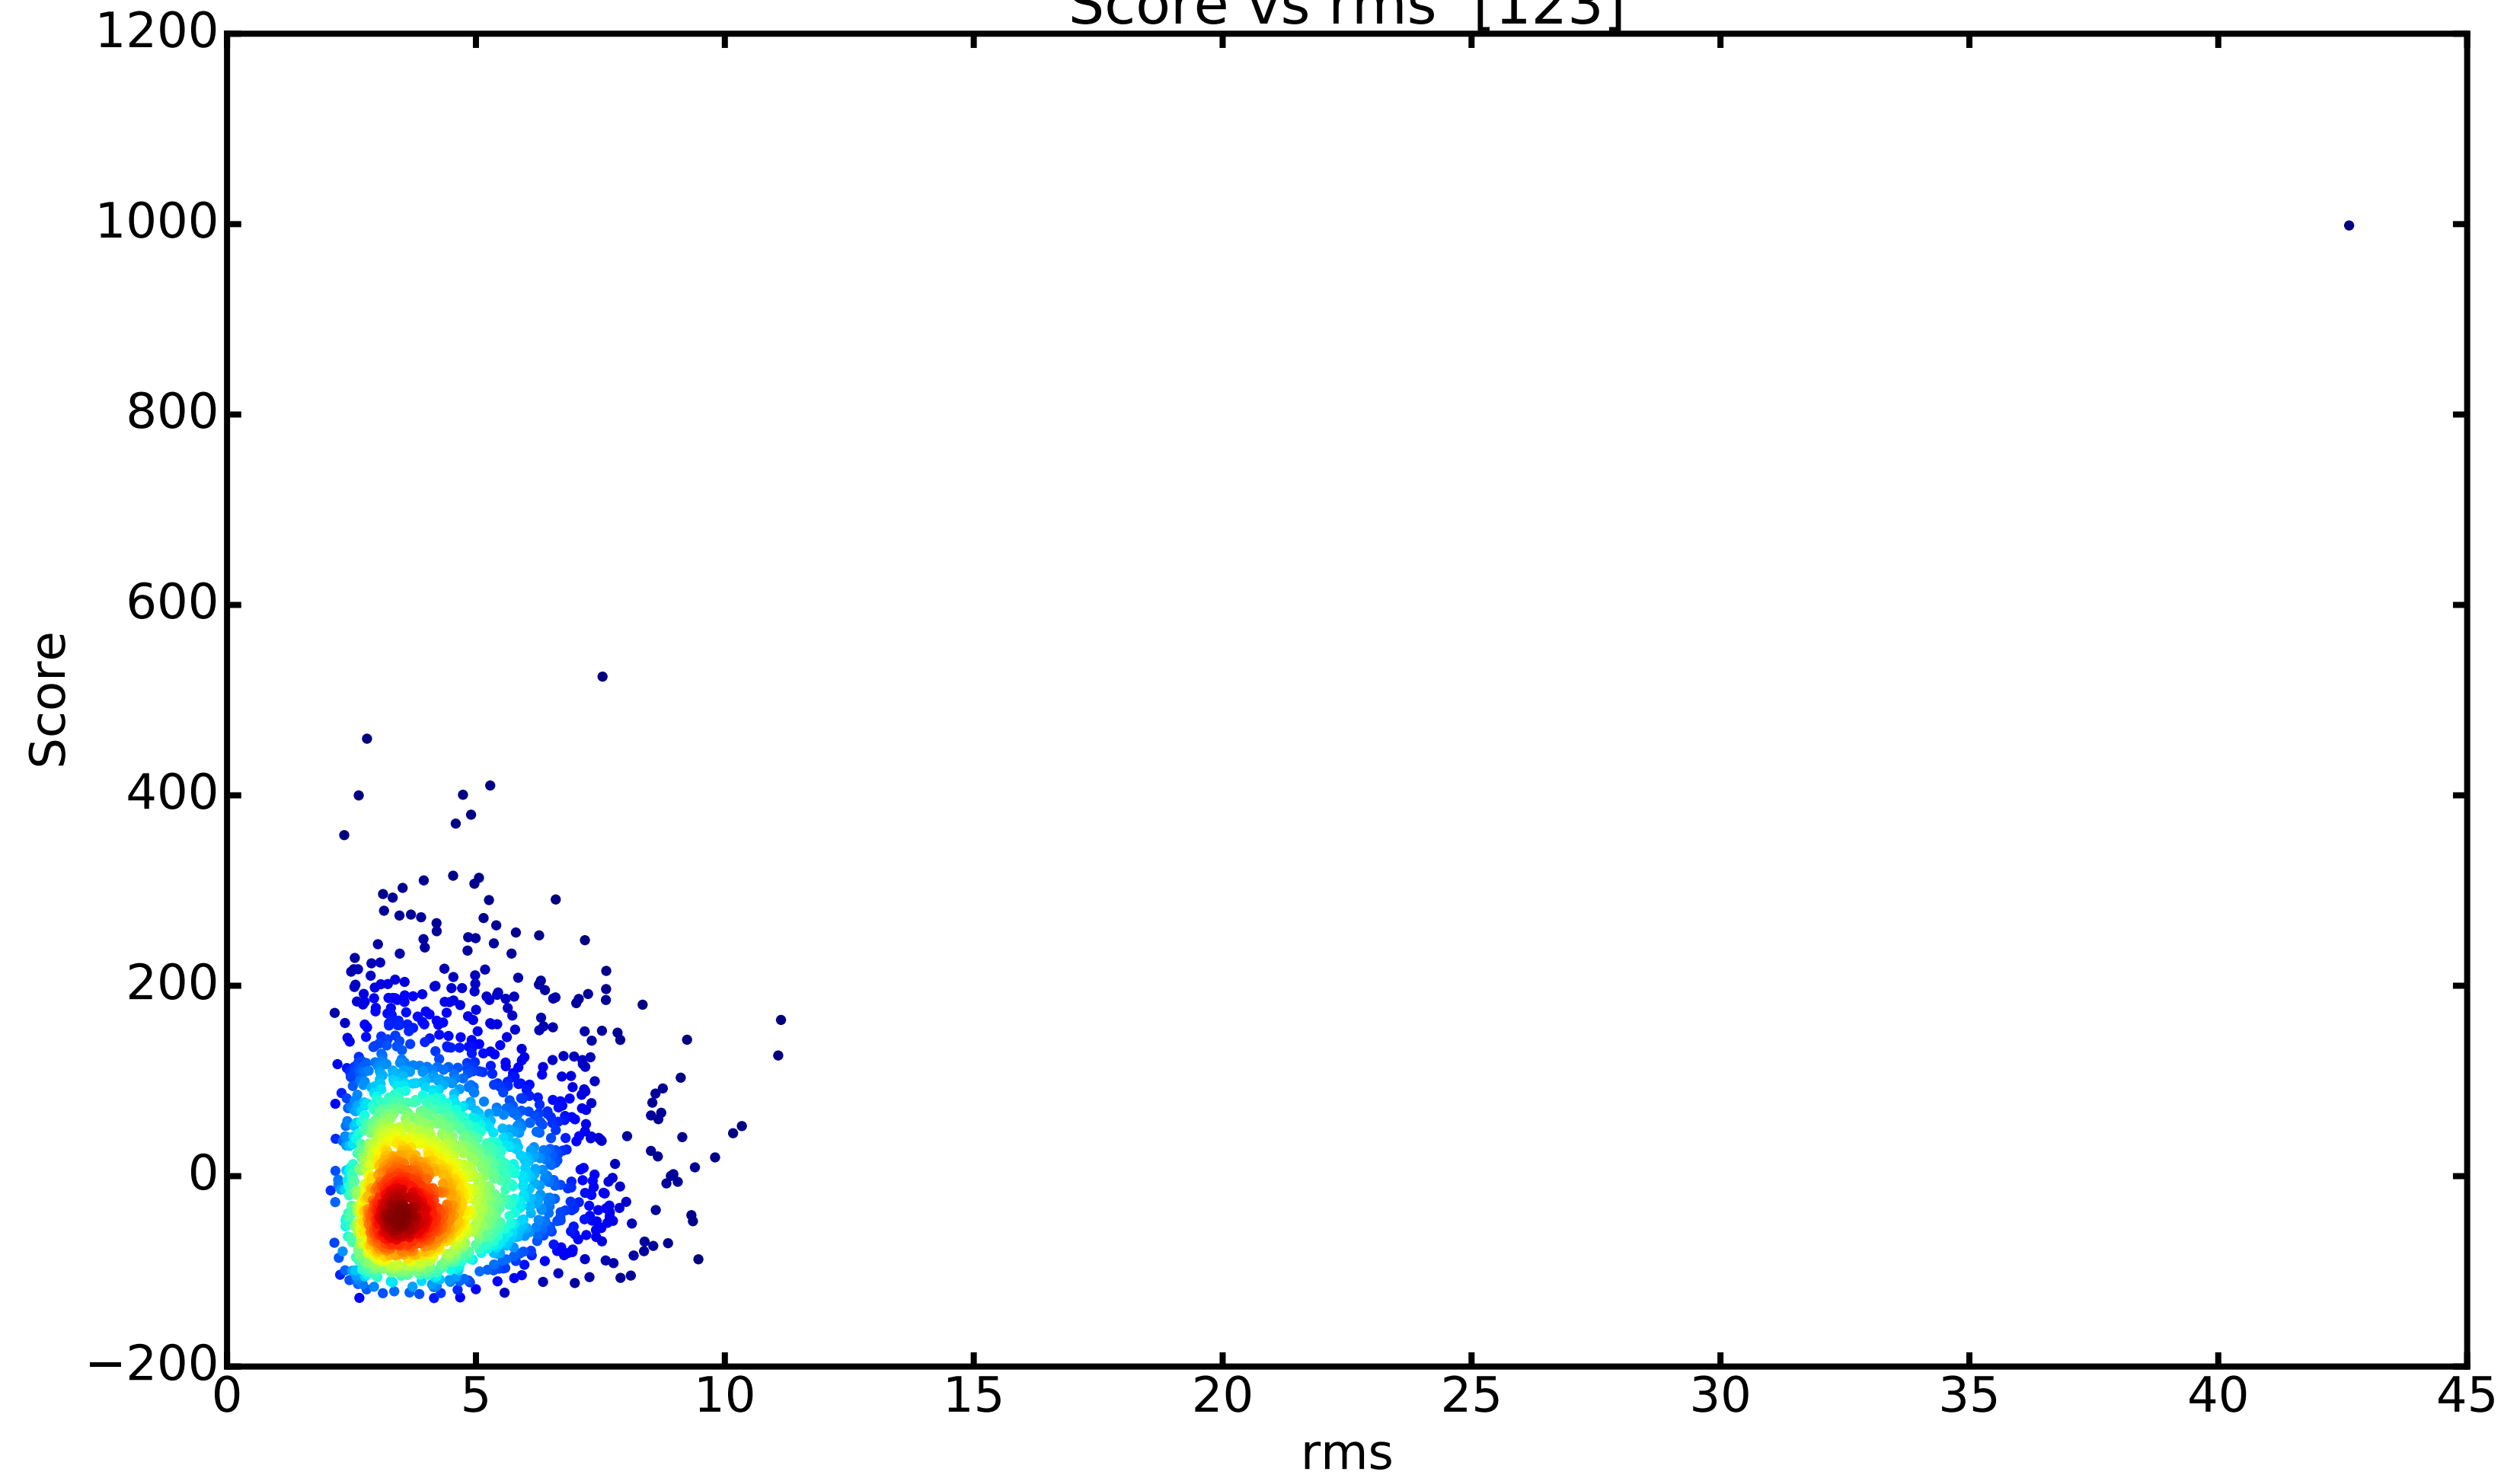

Score vs rms [123]

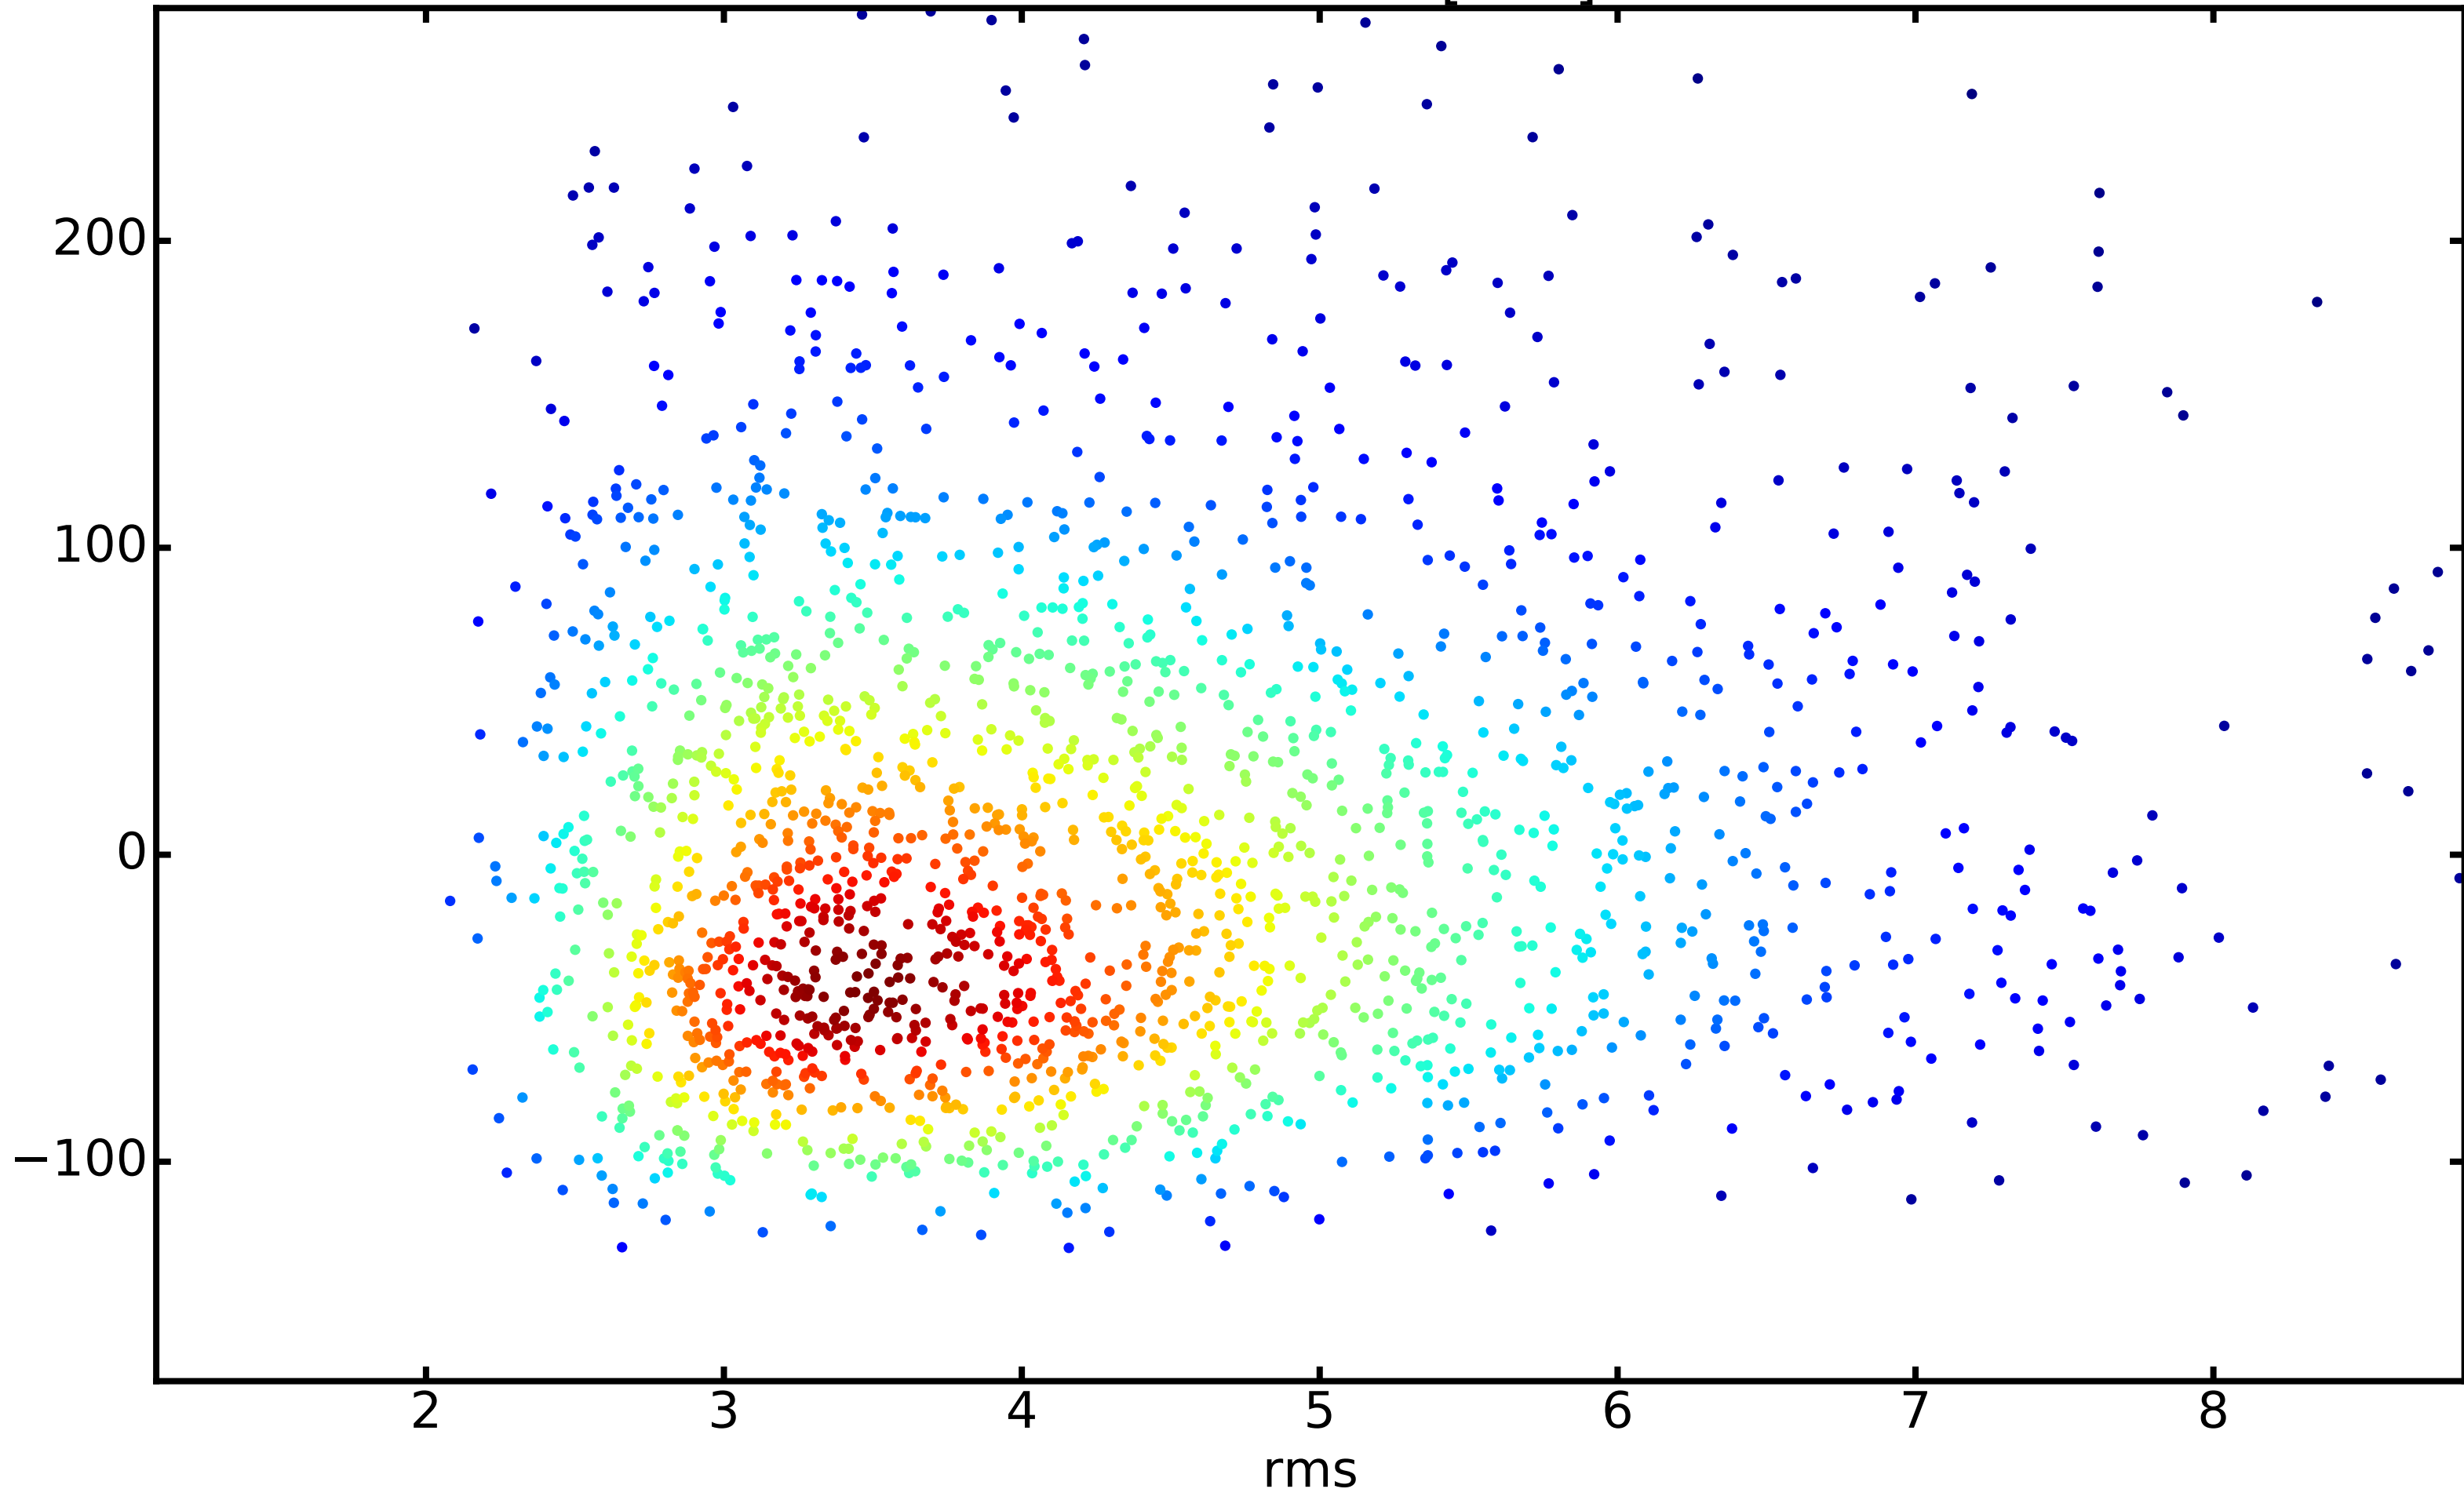

Score vs rms [125]

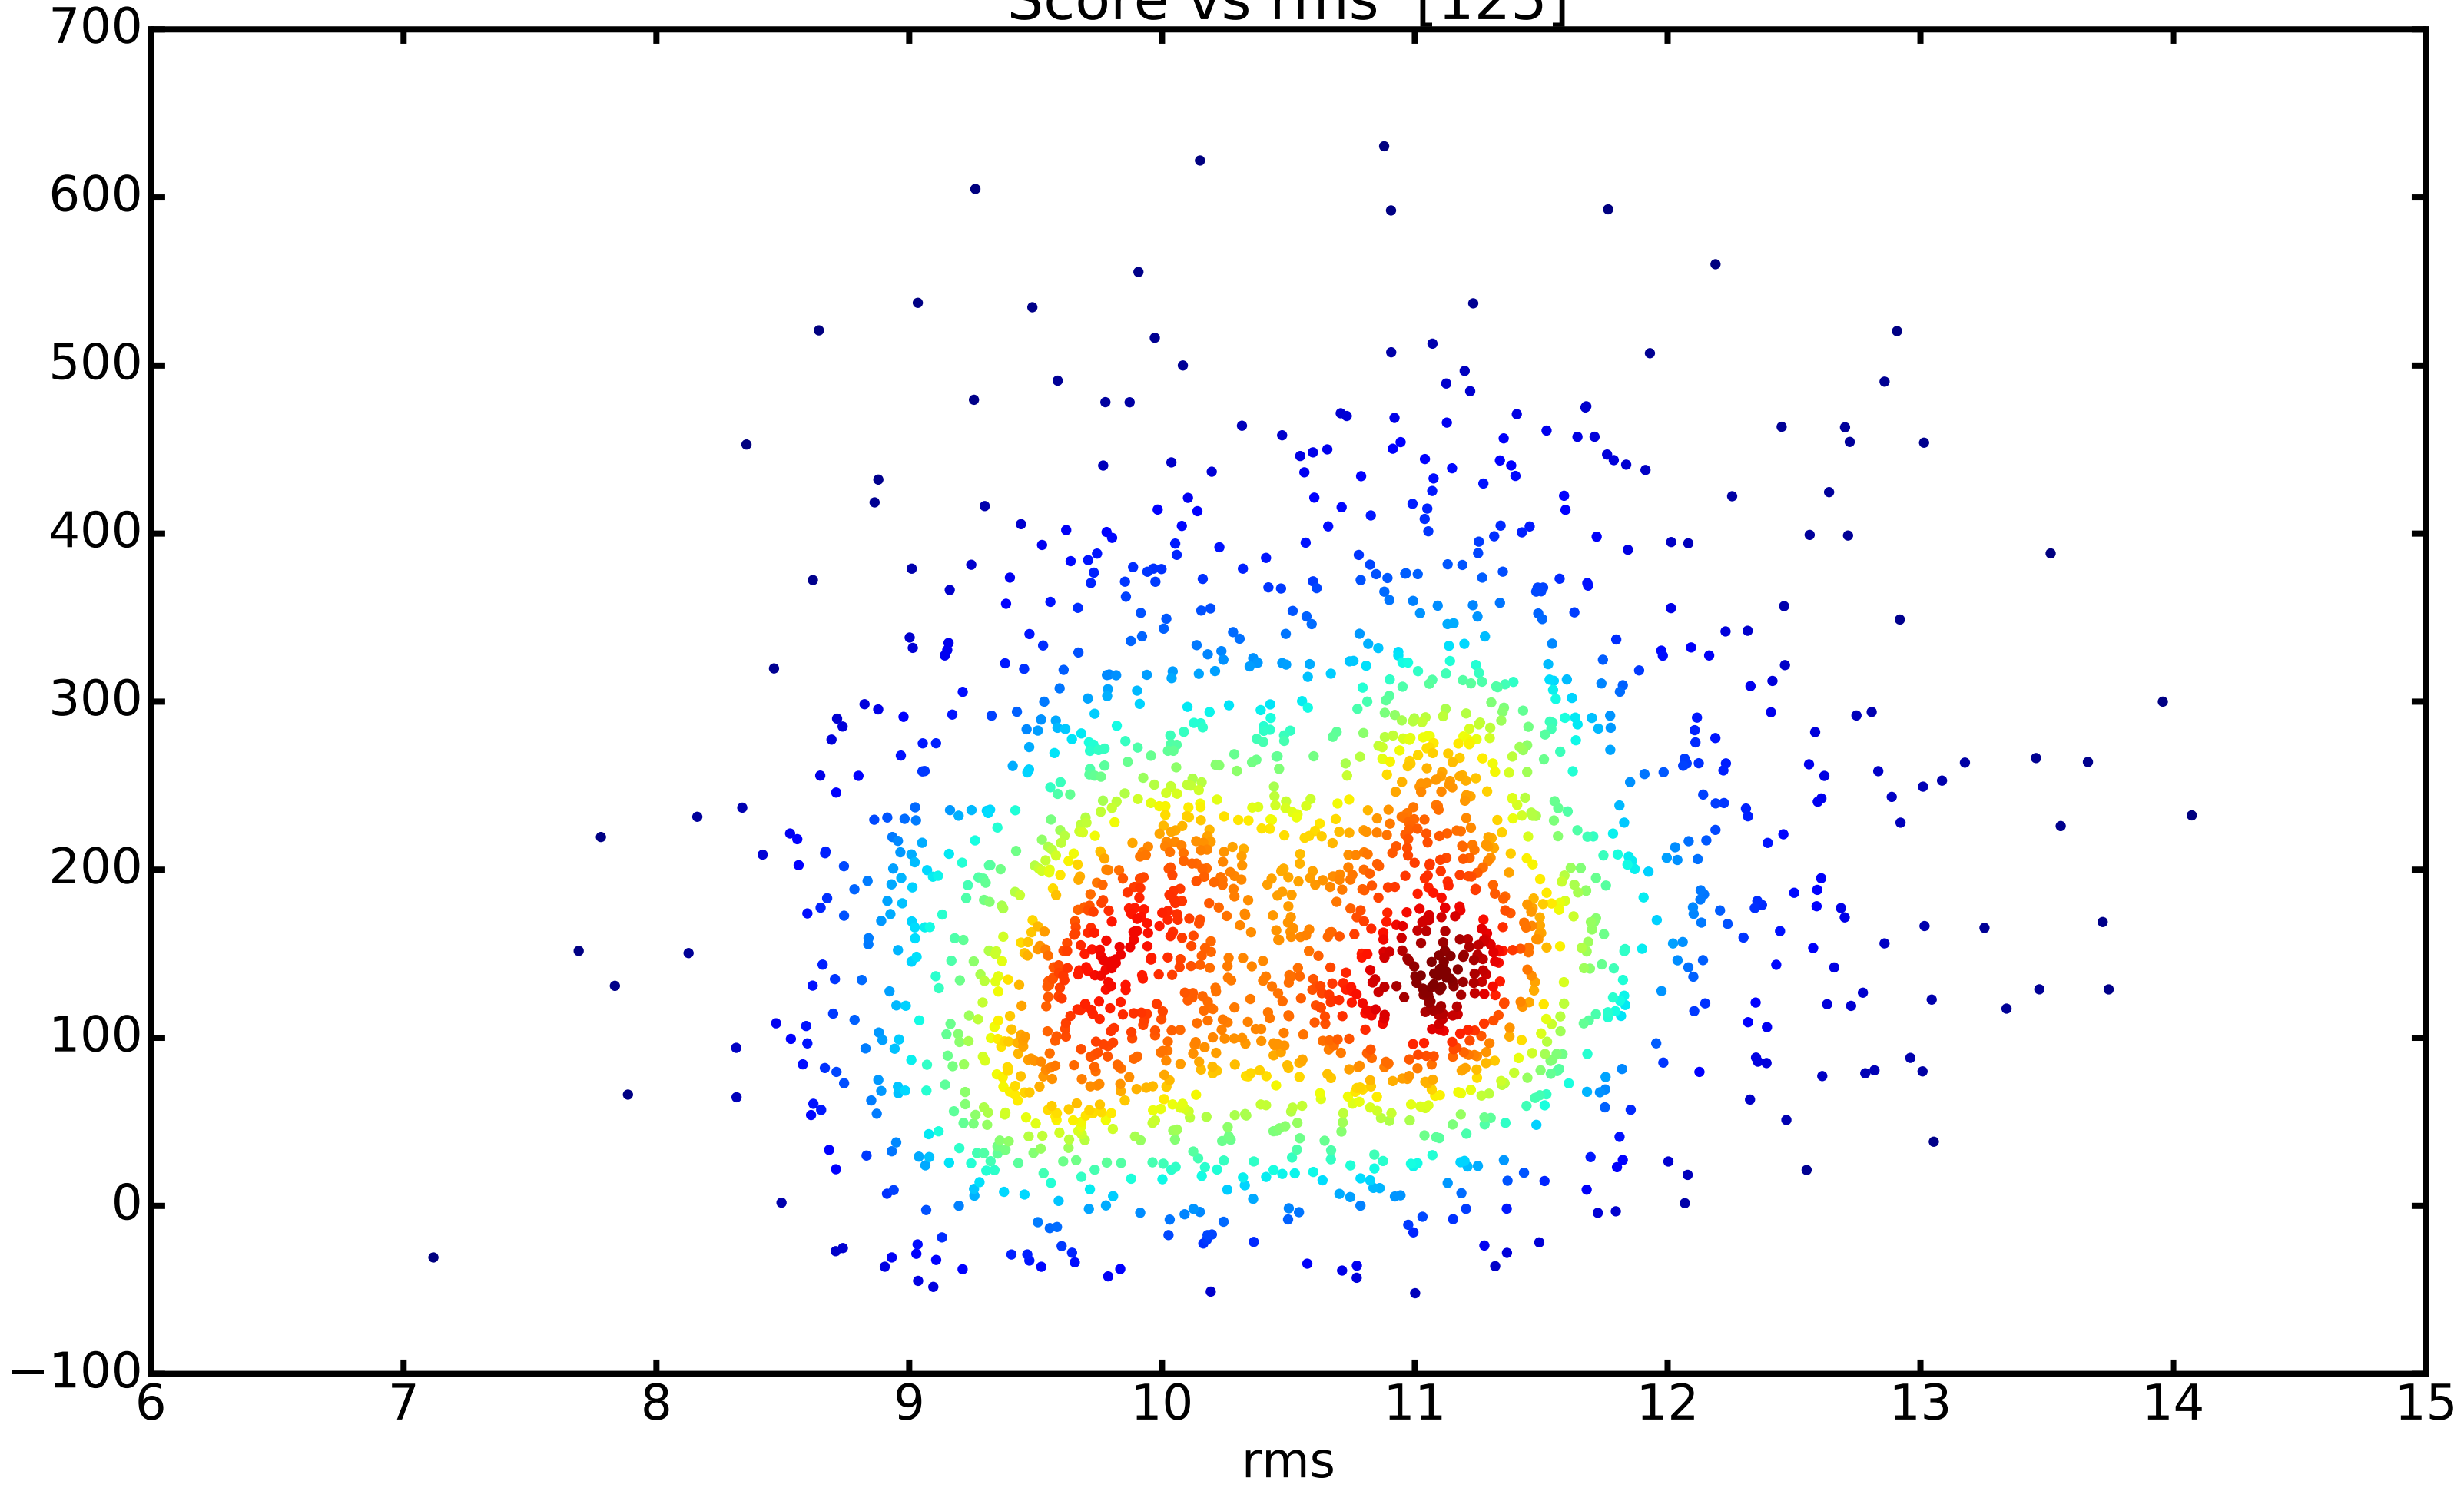

Score vs rms [126]

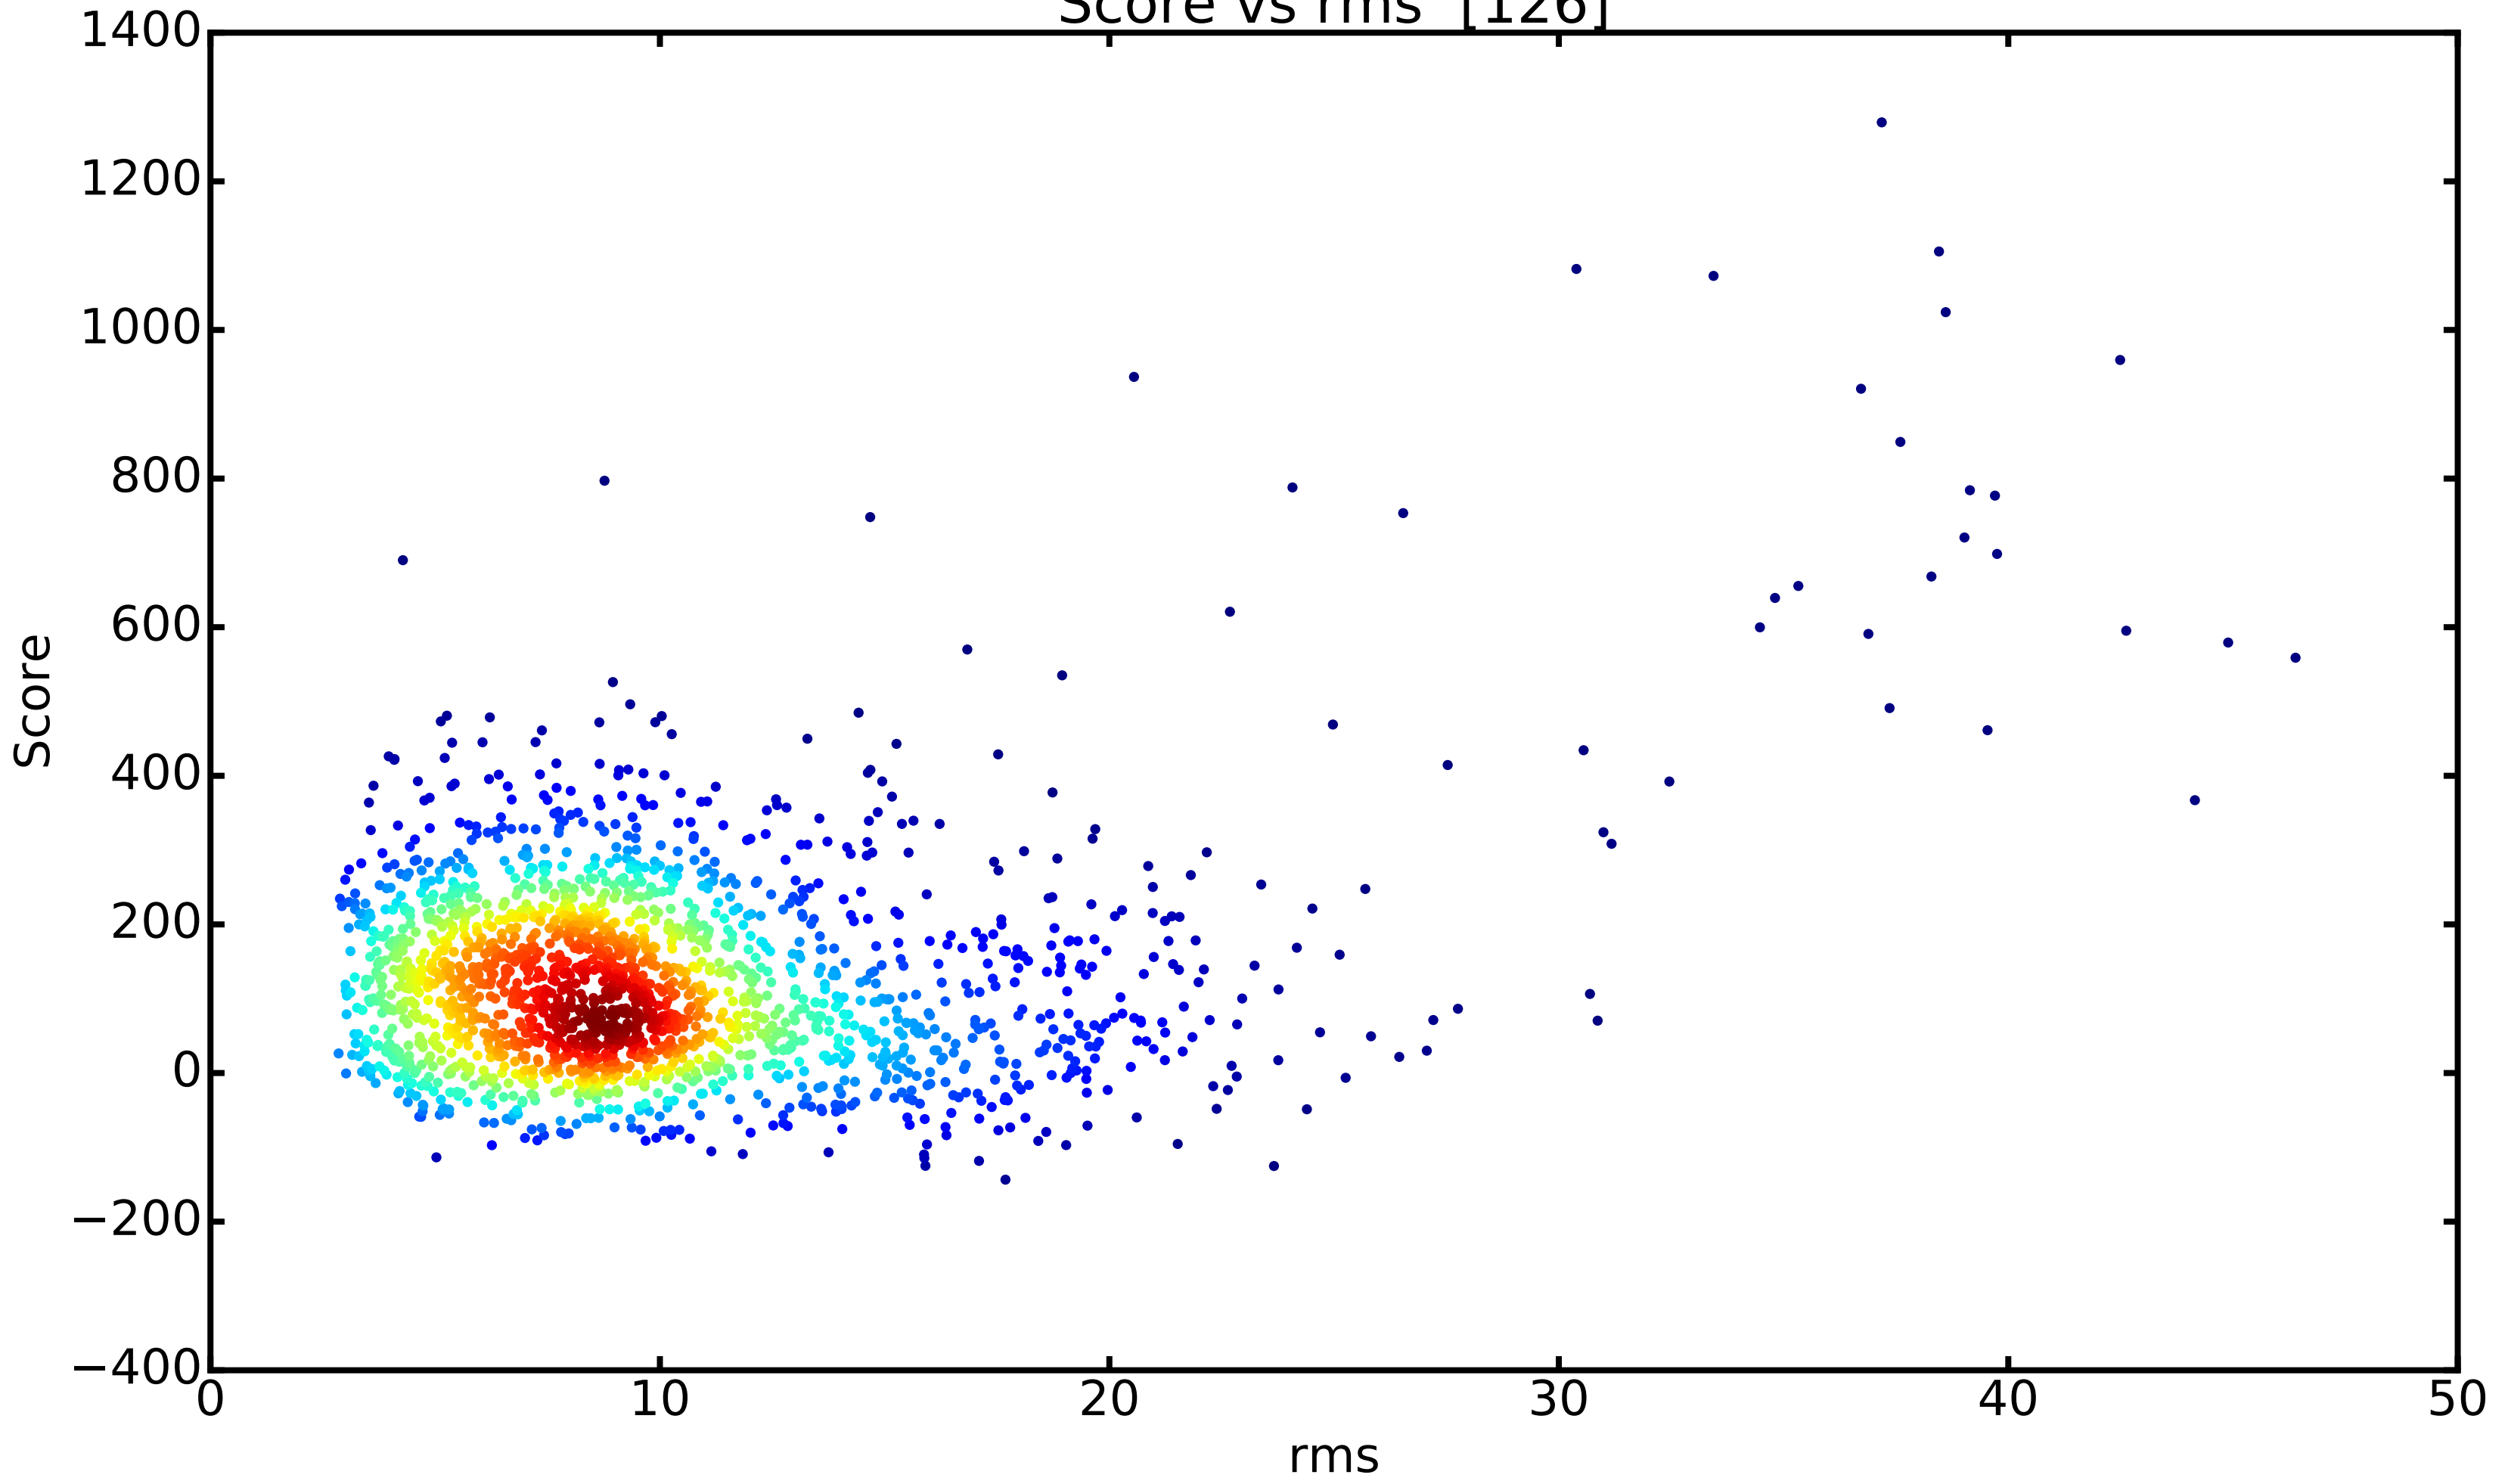

Score vs rms [126]

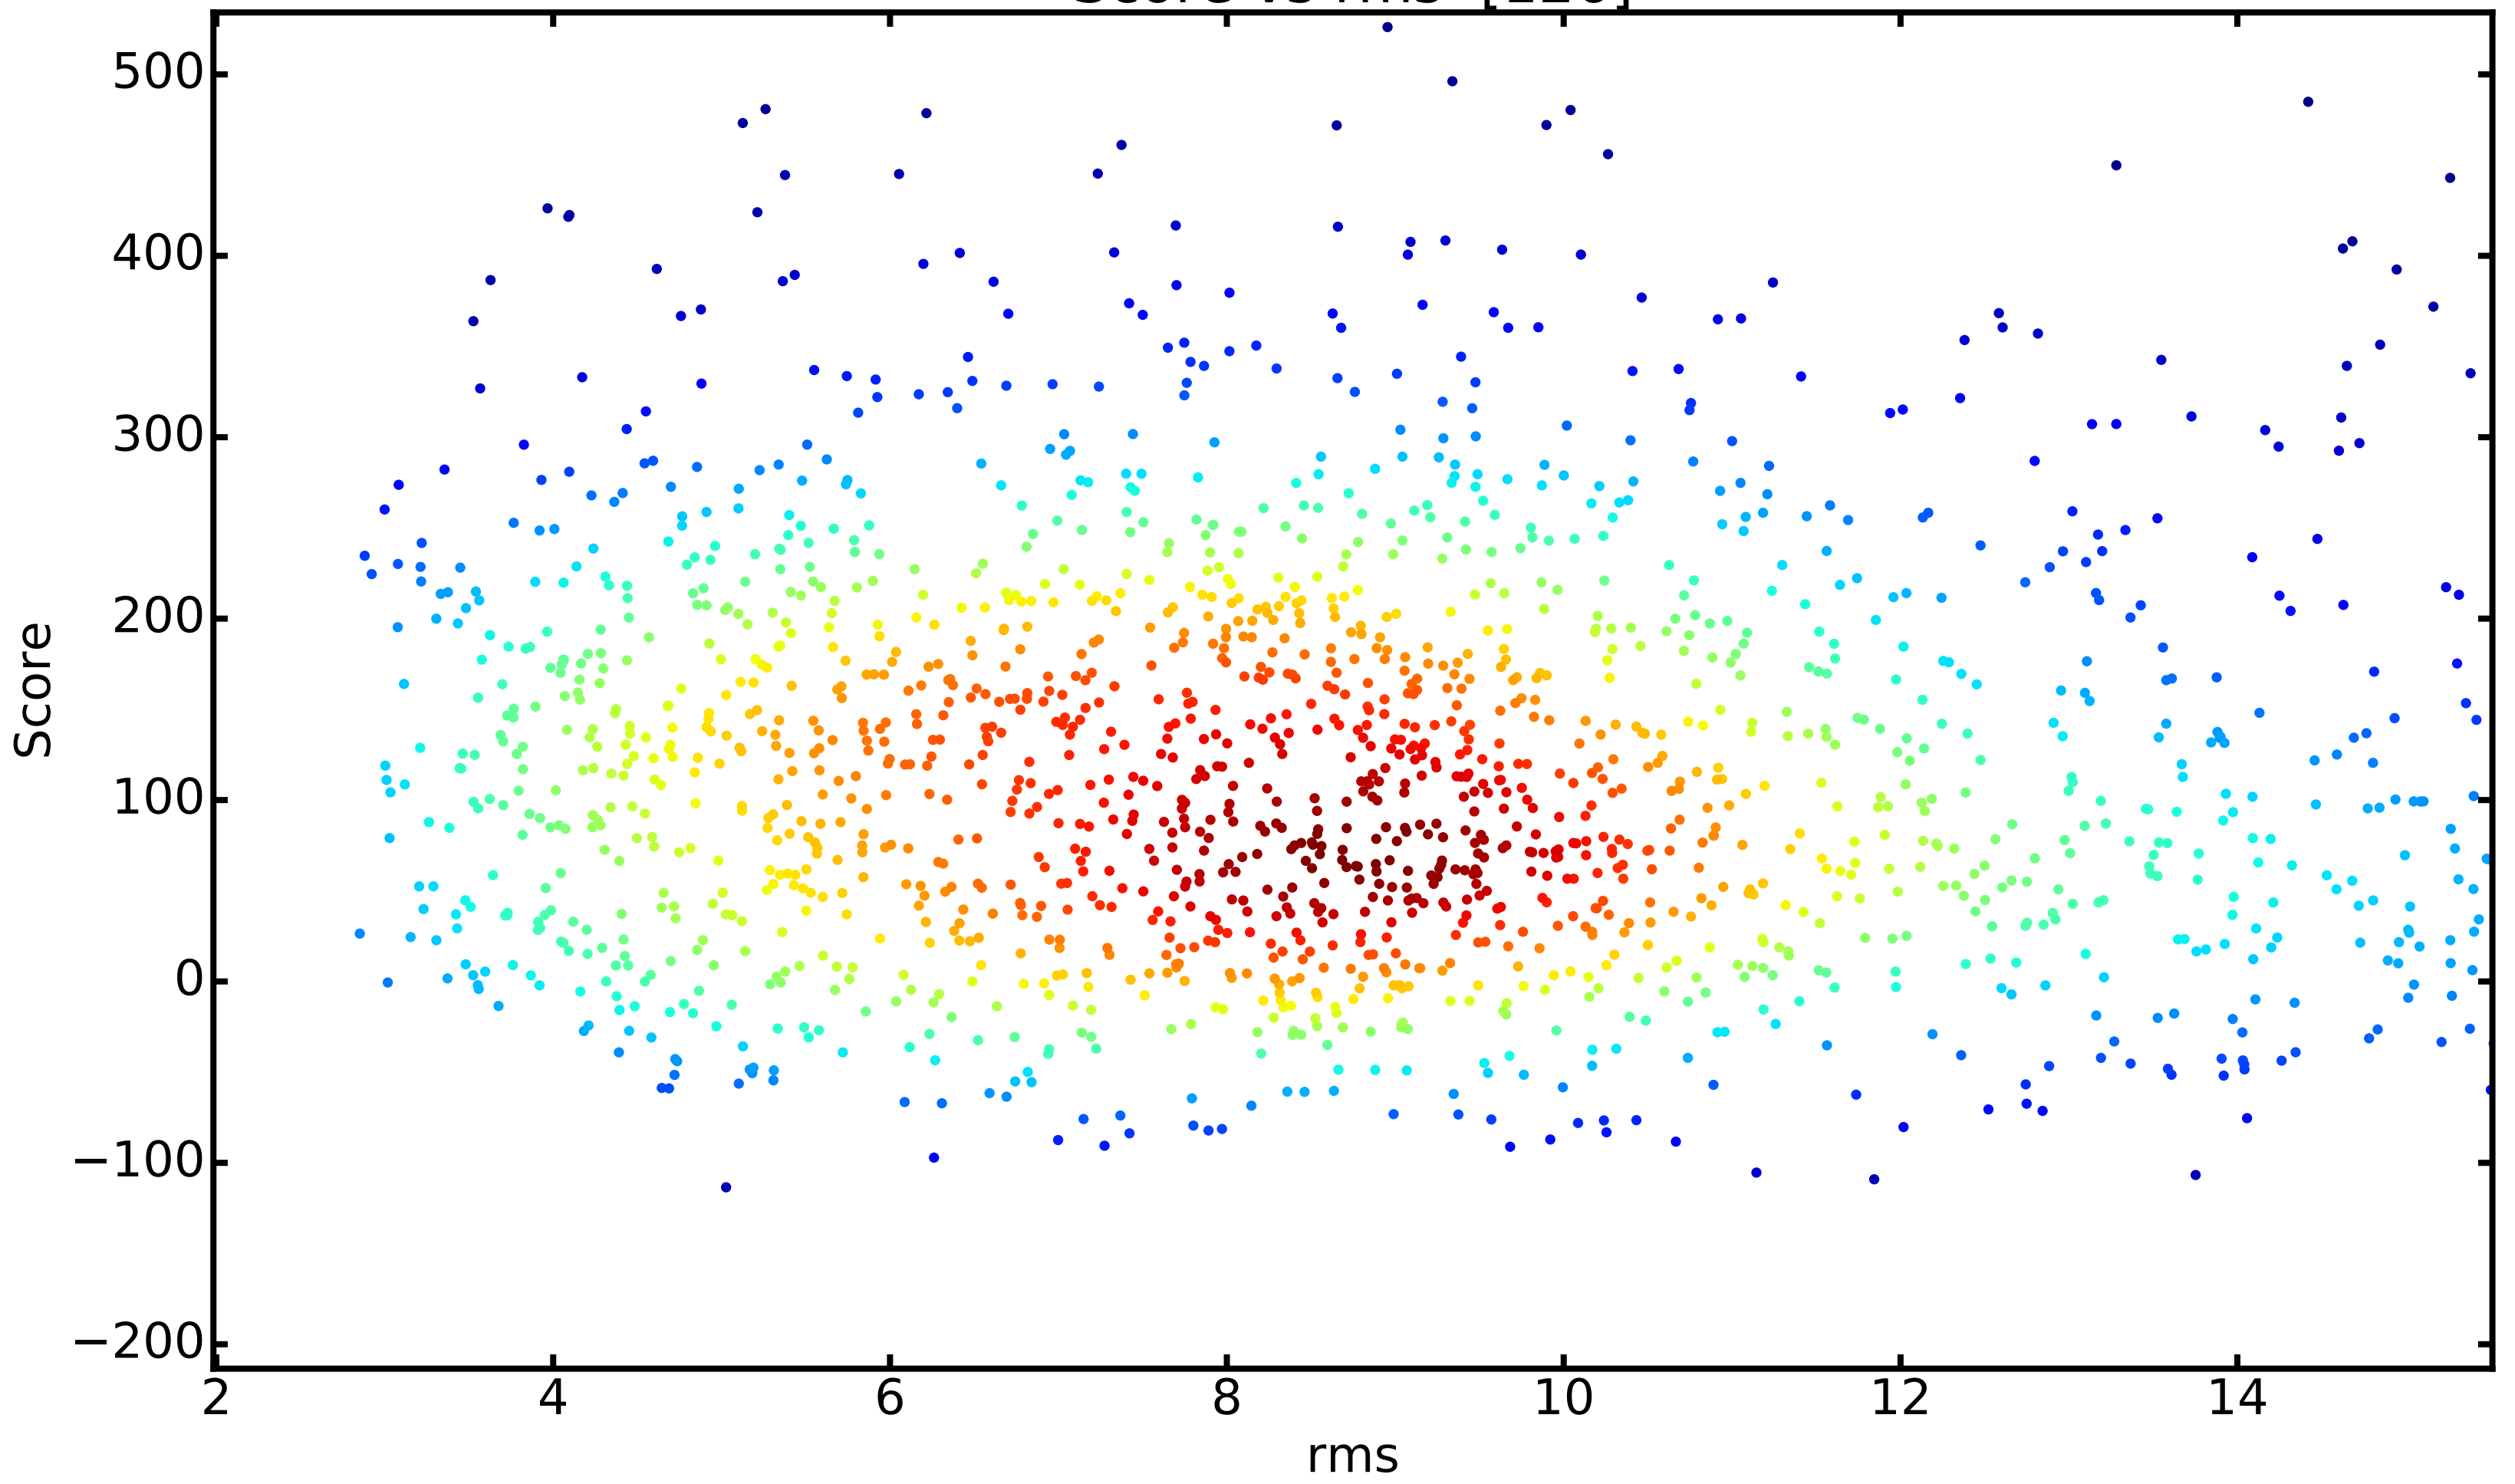

Score vs rms [127]

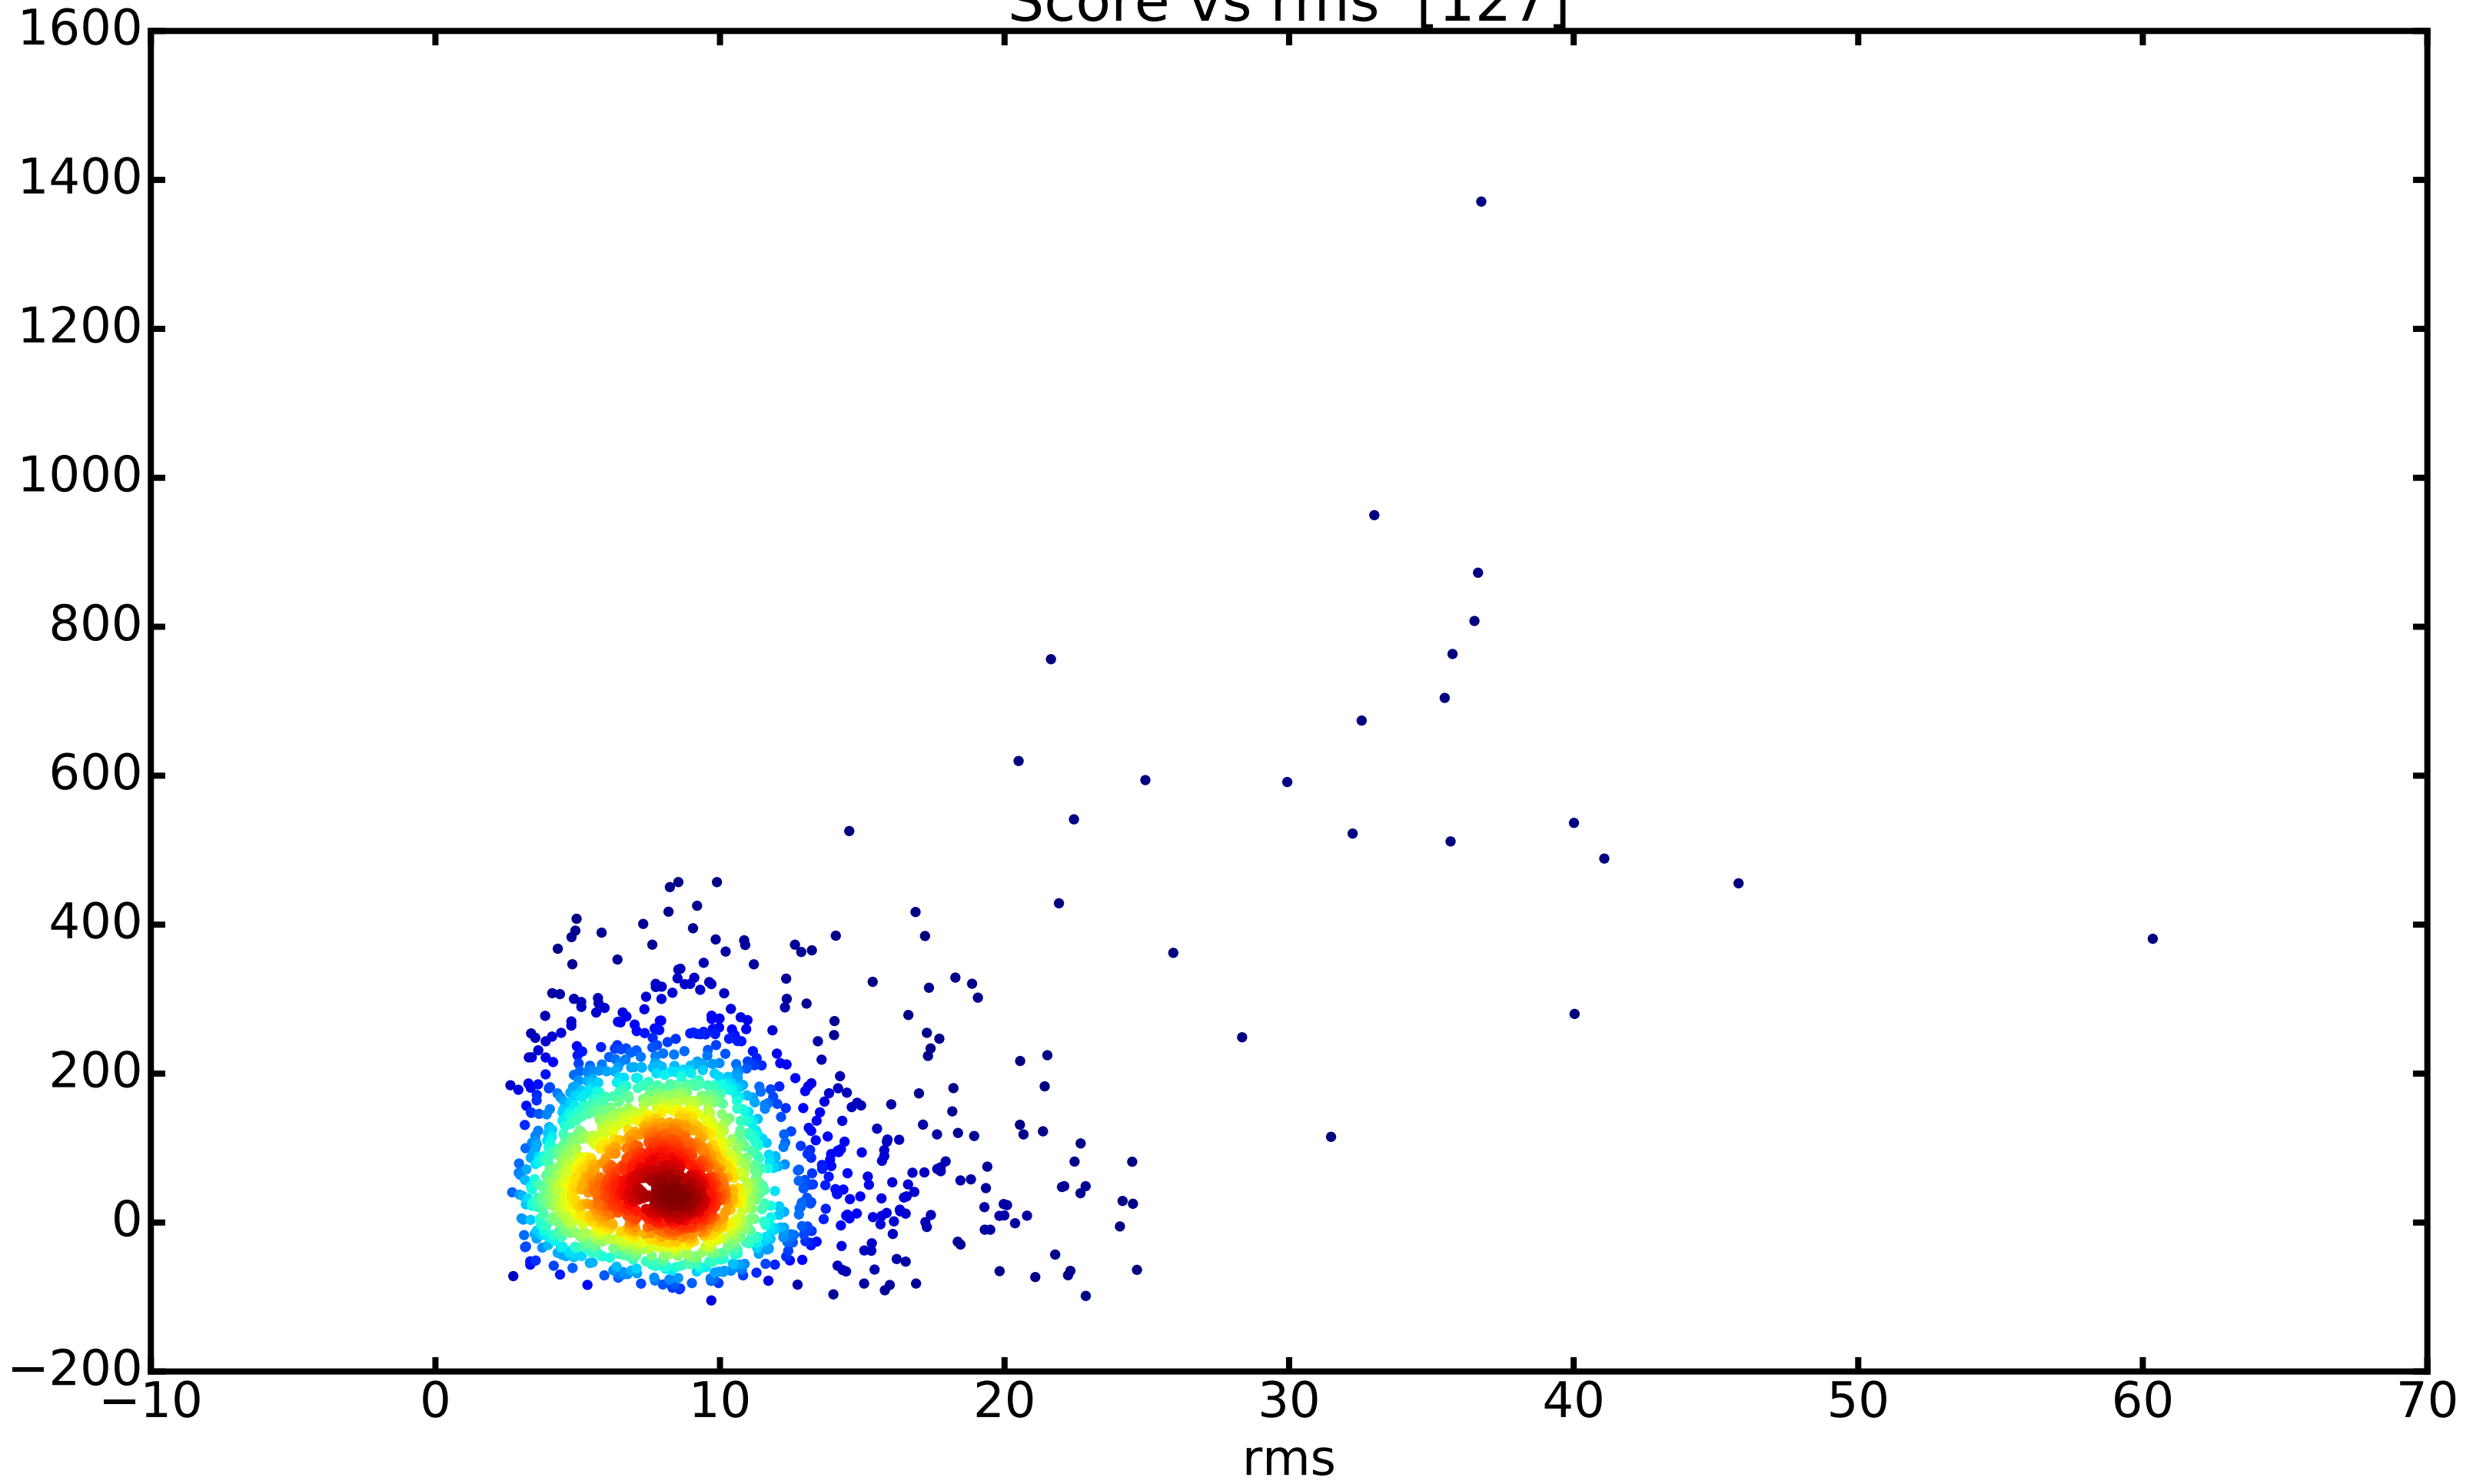

Score vs rms [127]

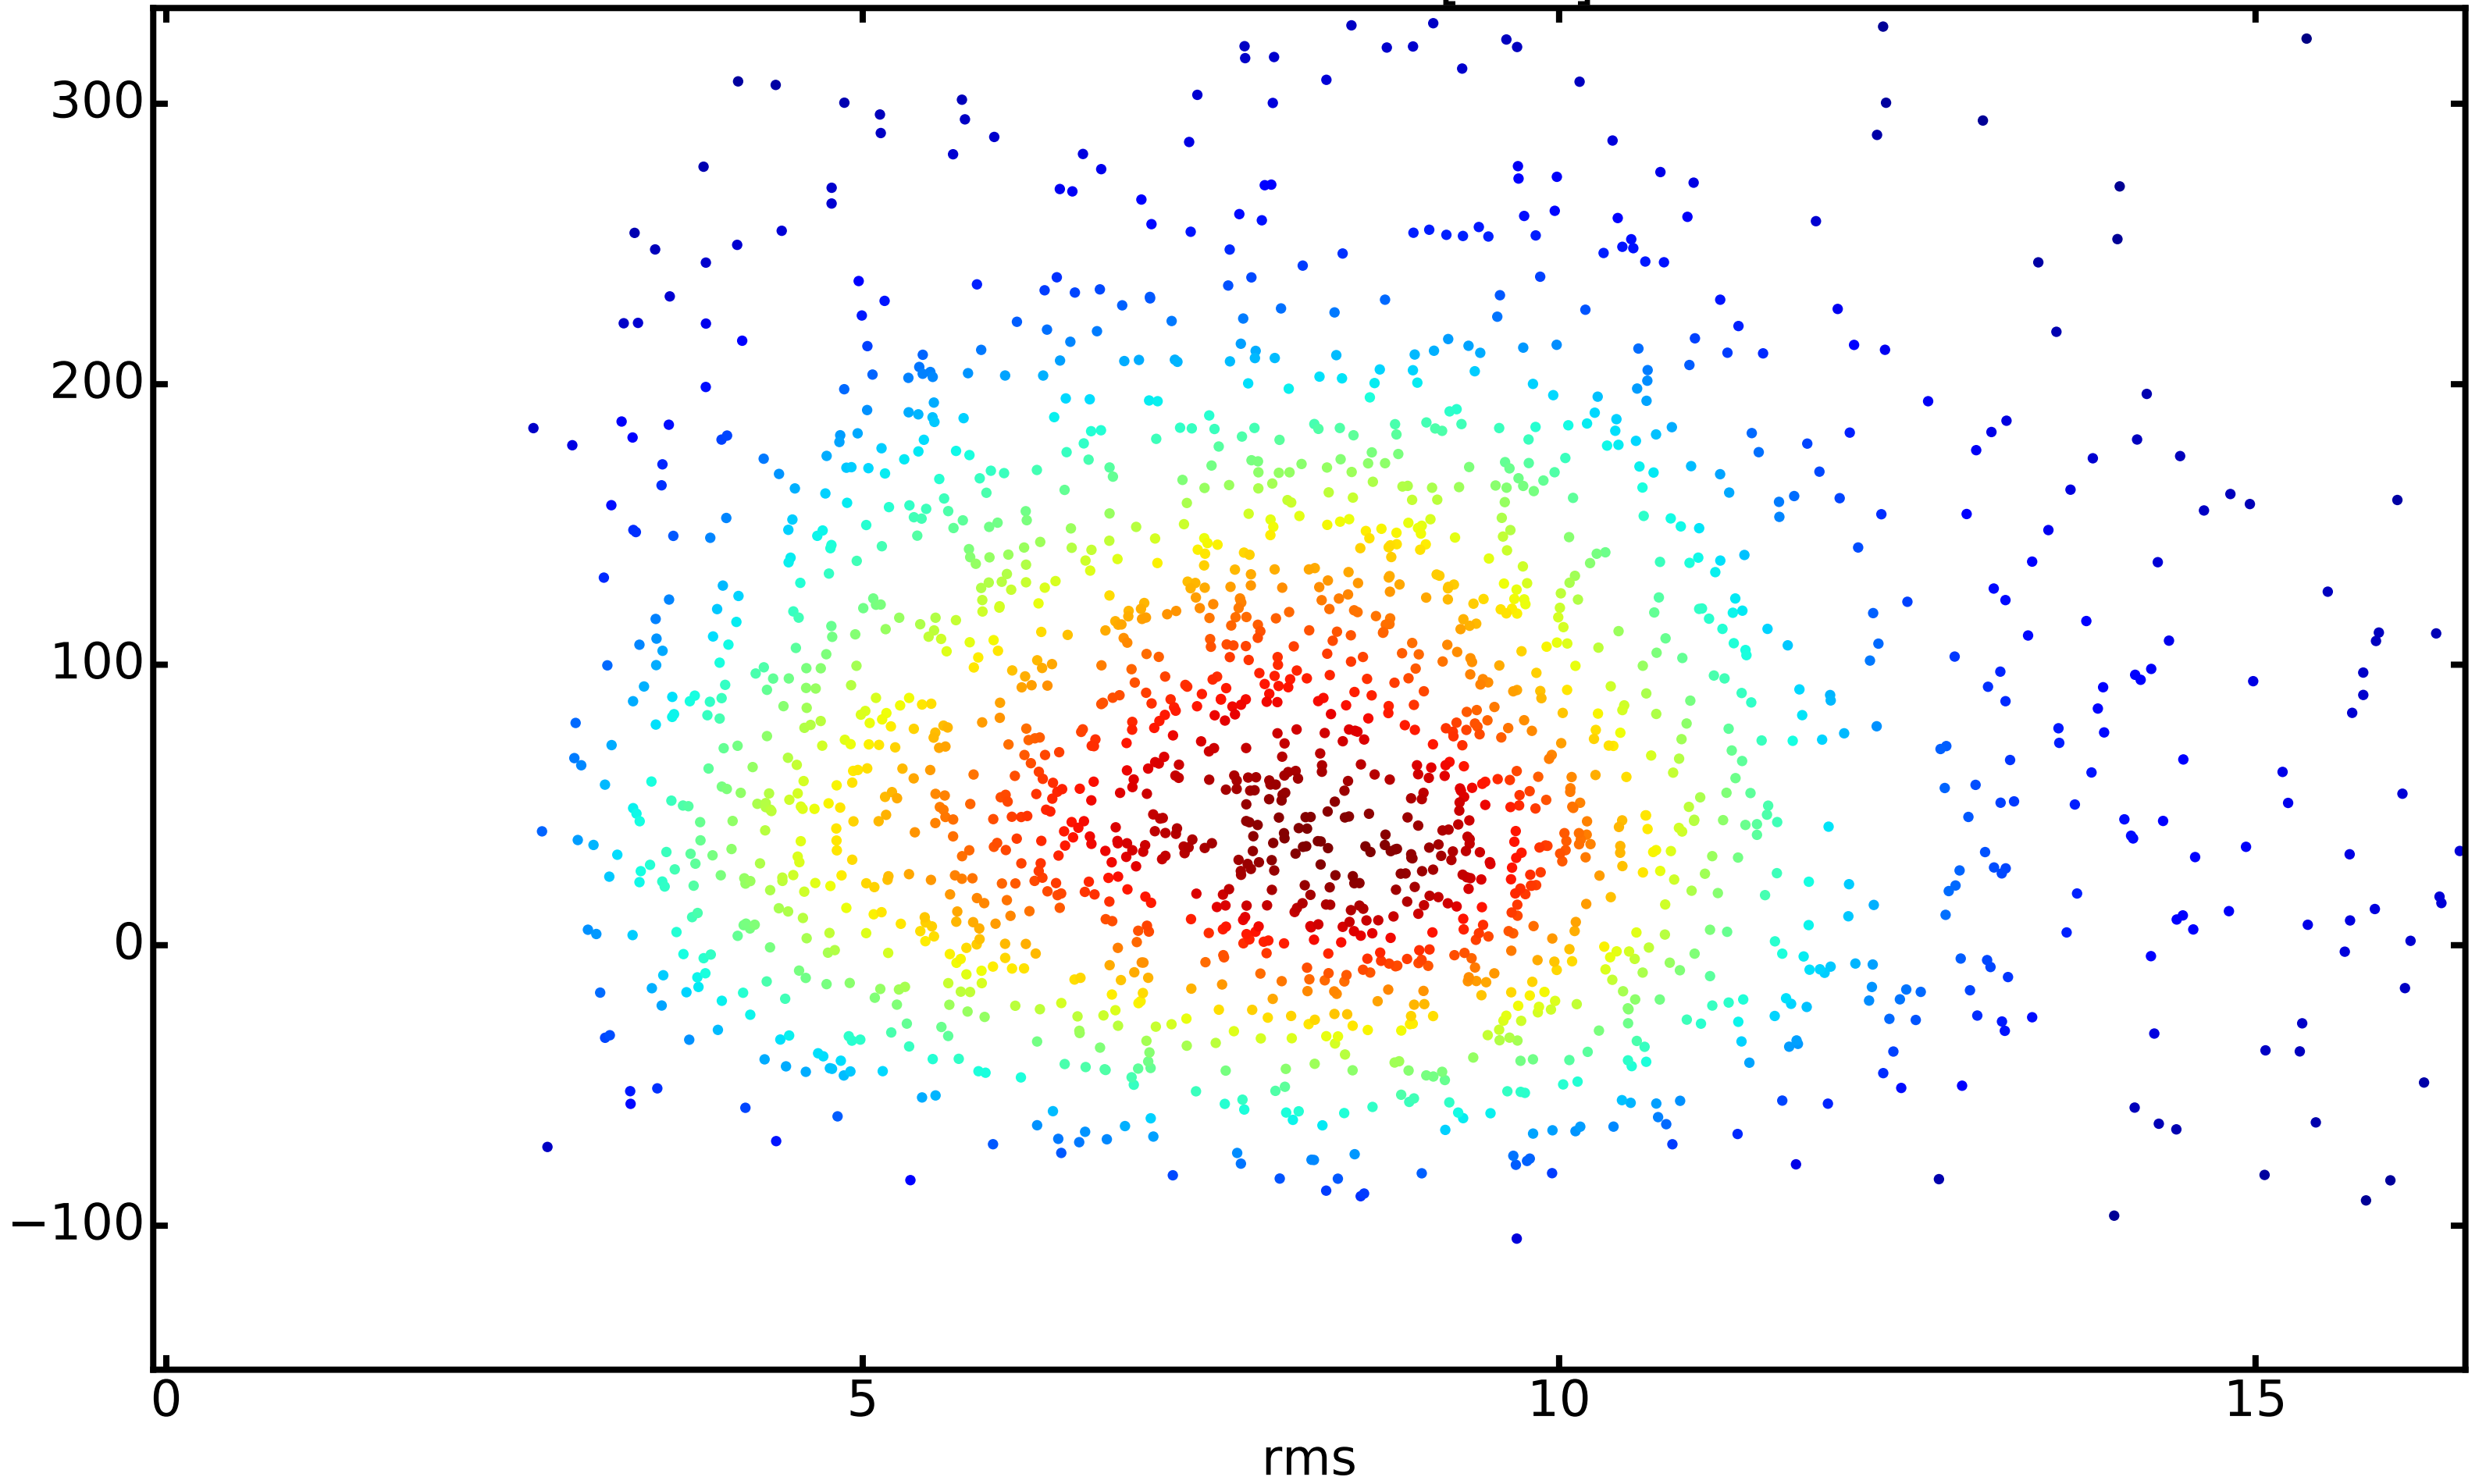

Score vs rms [128]

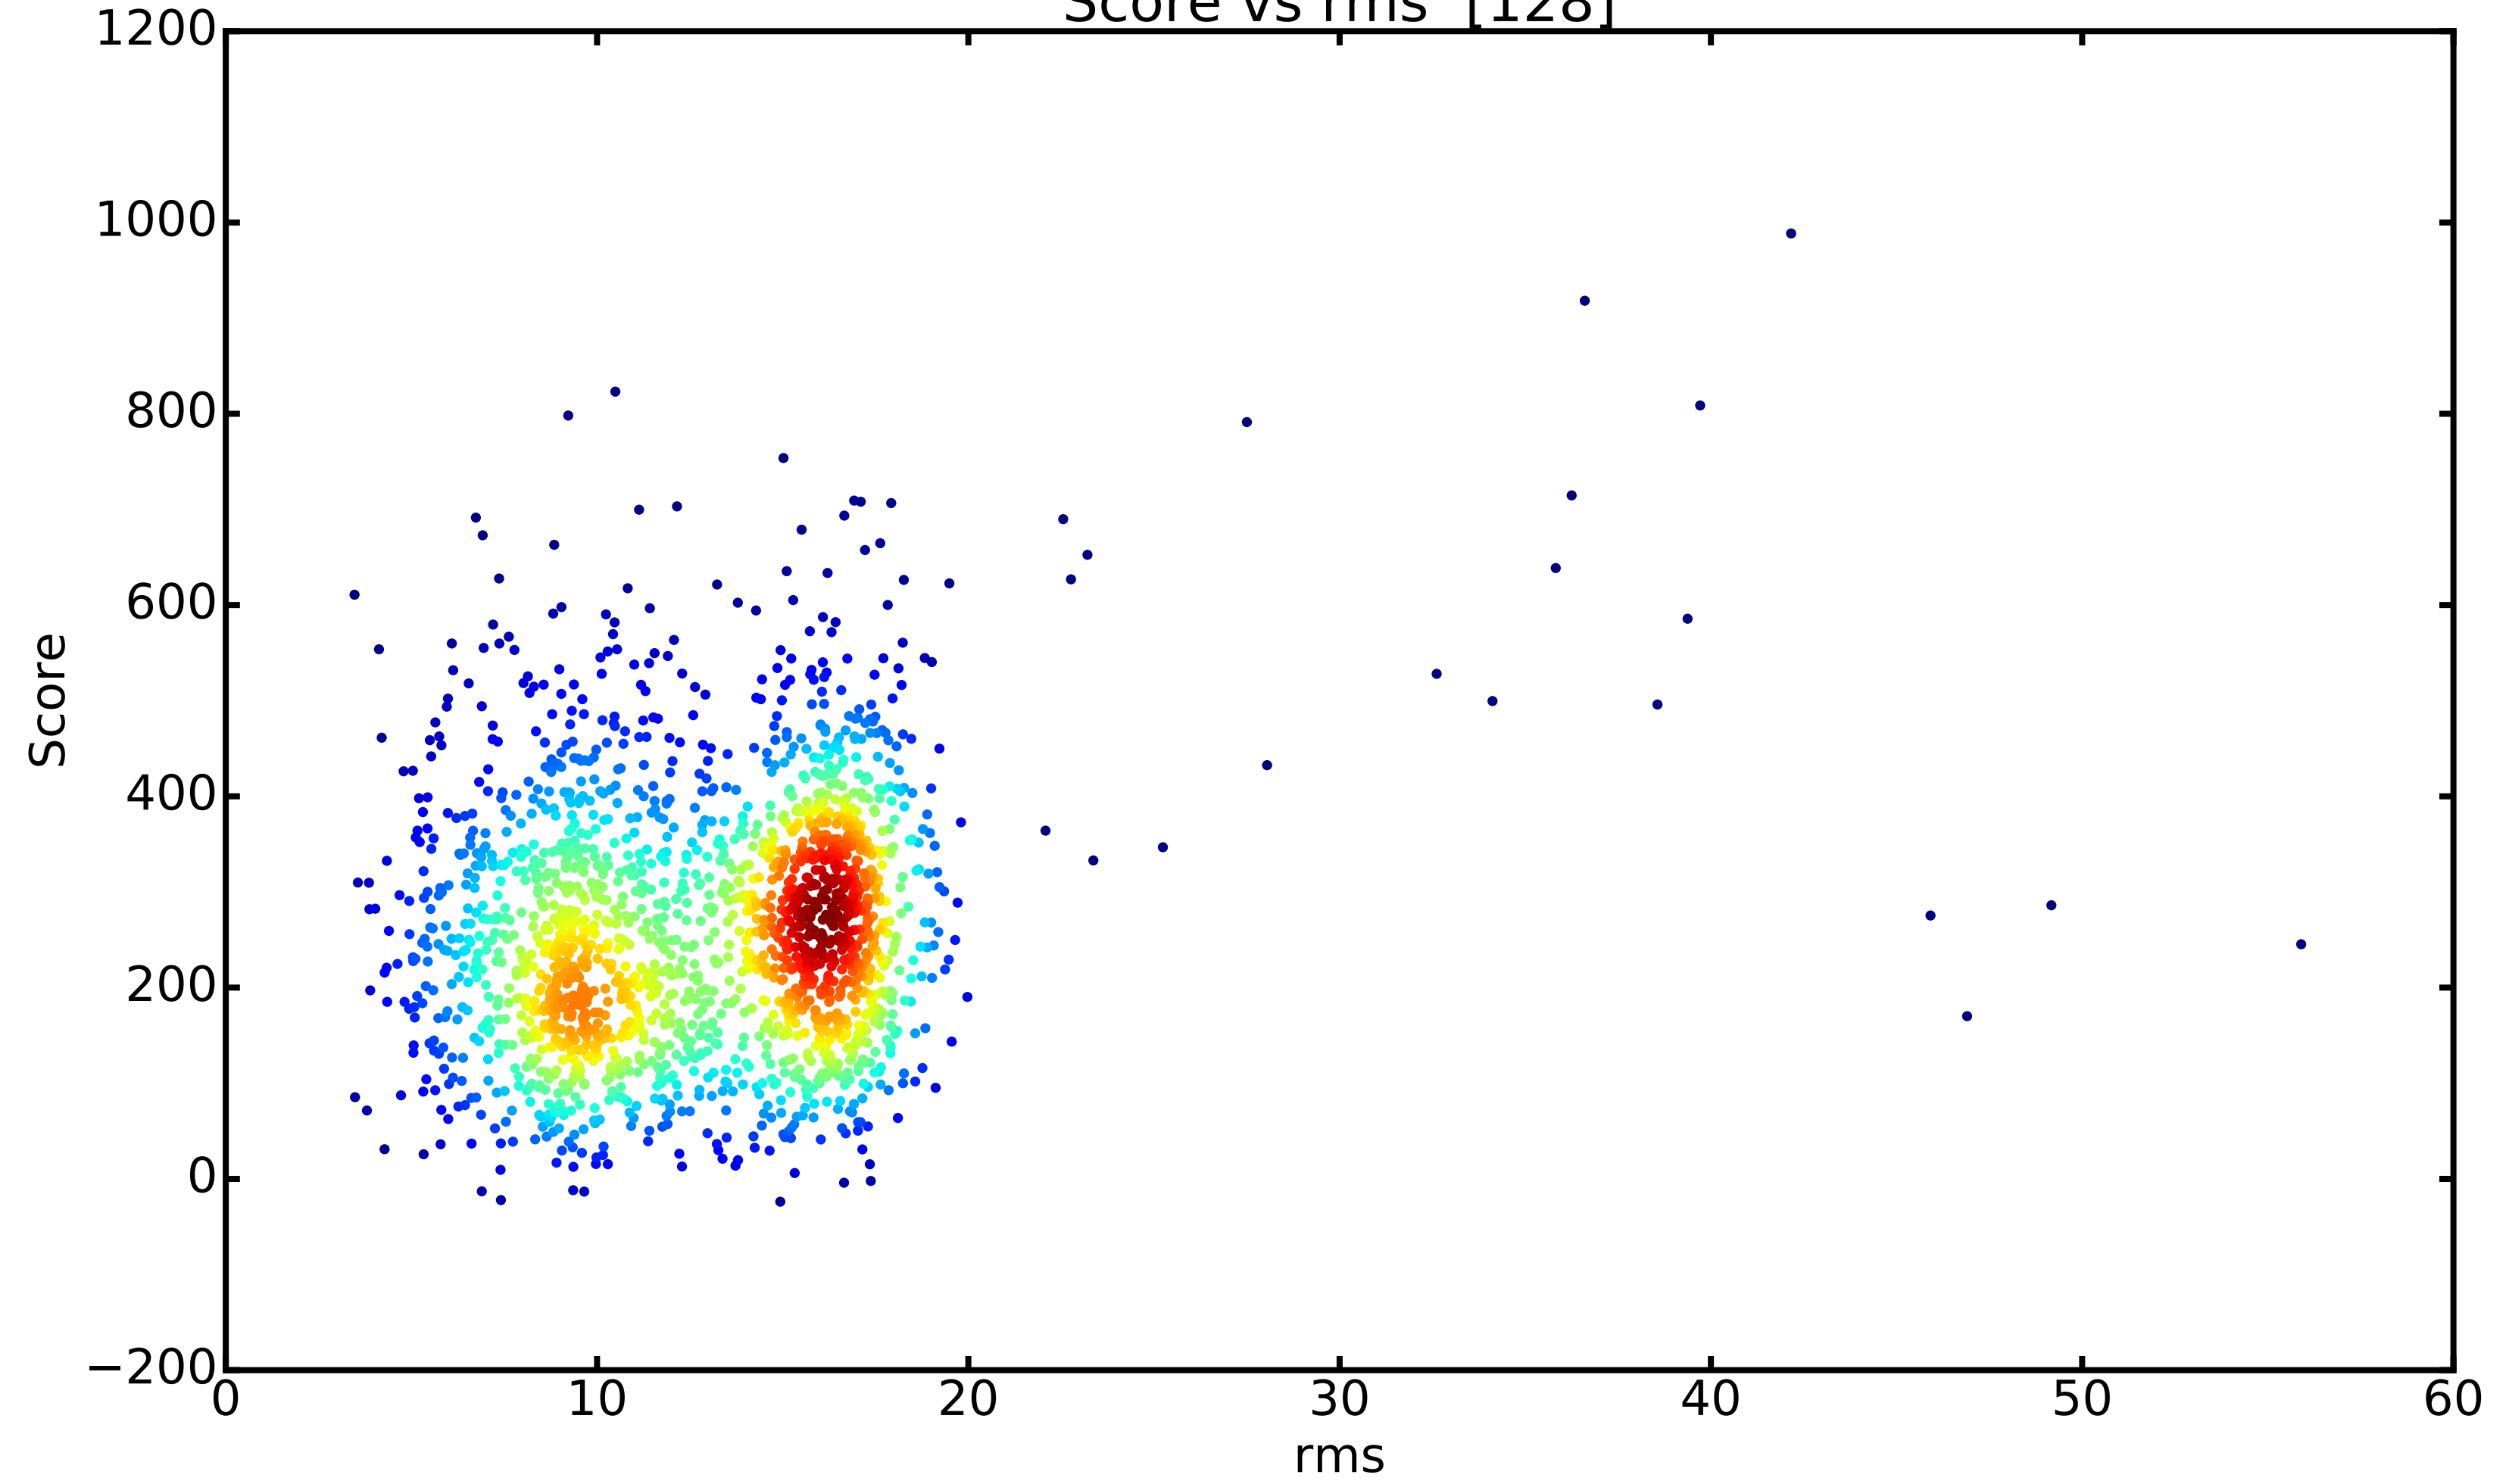



Score vs rms [128]

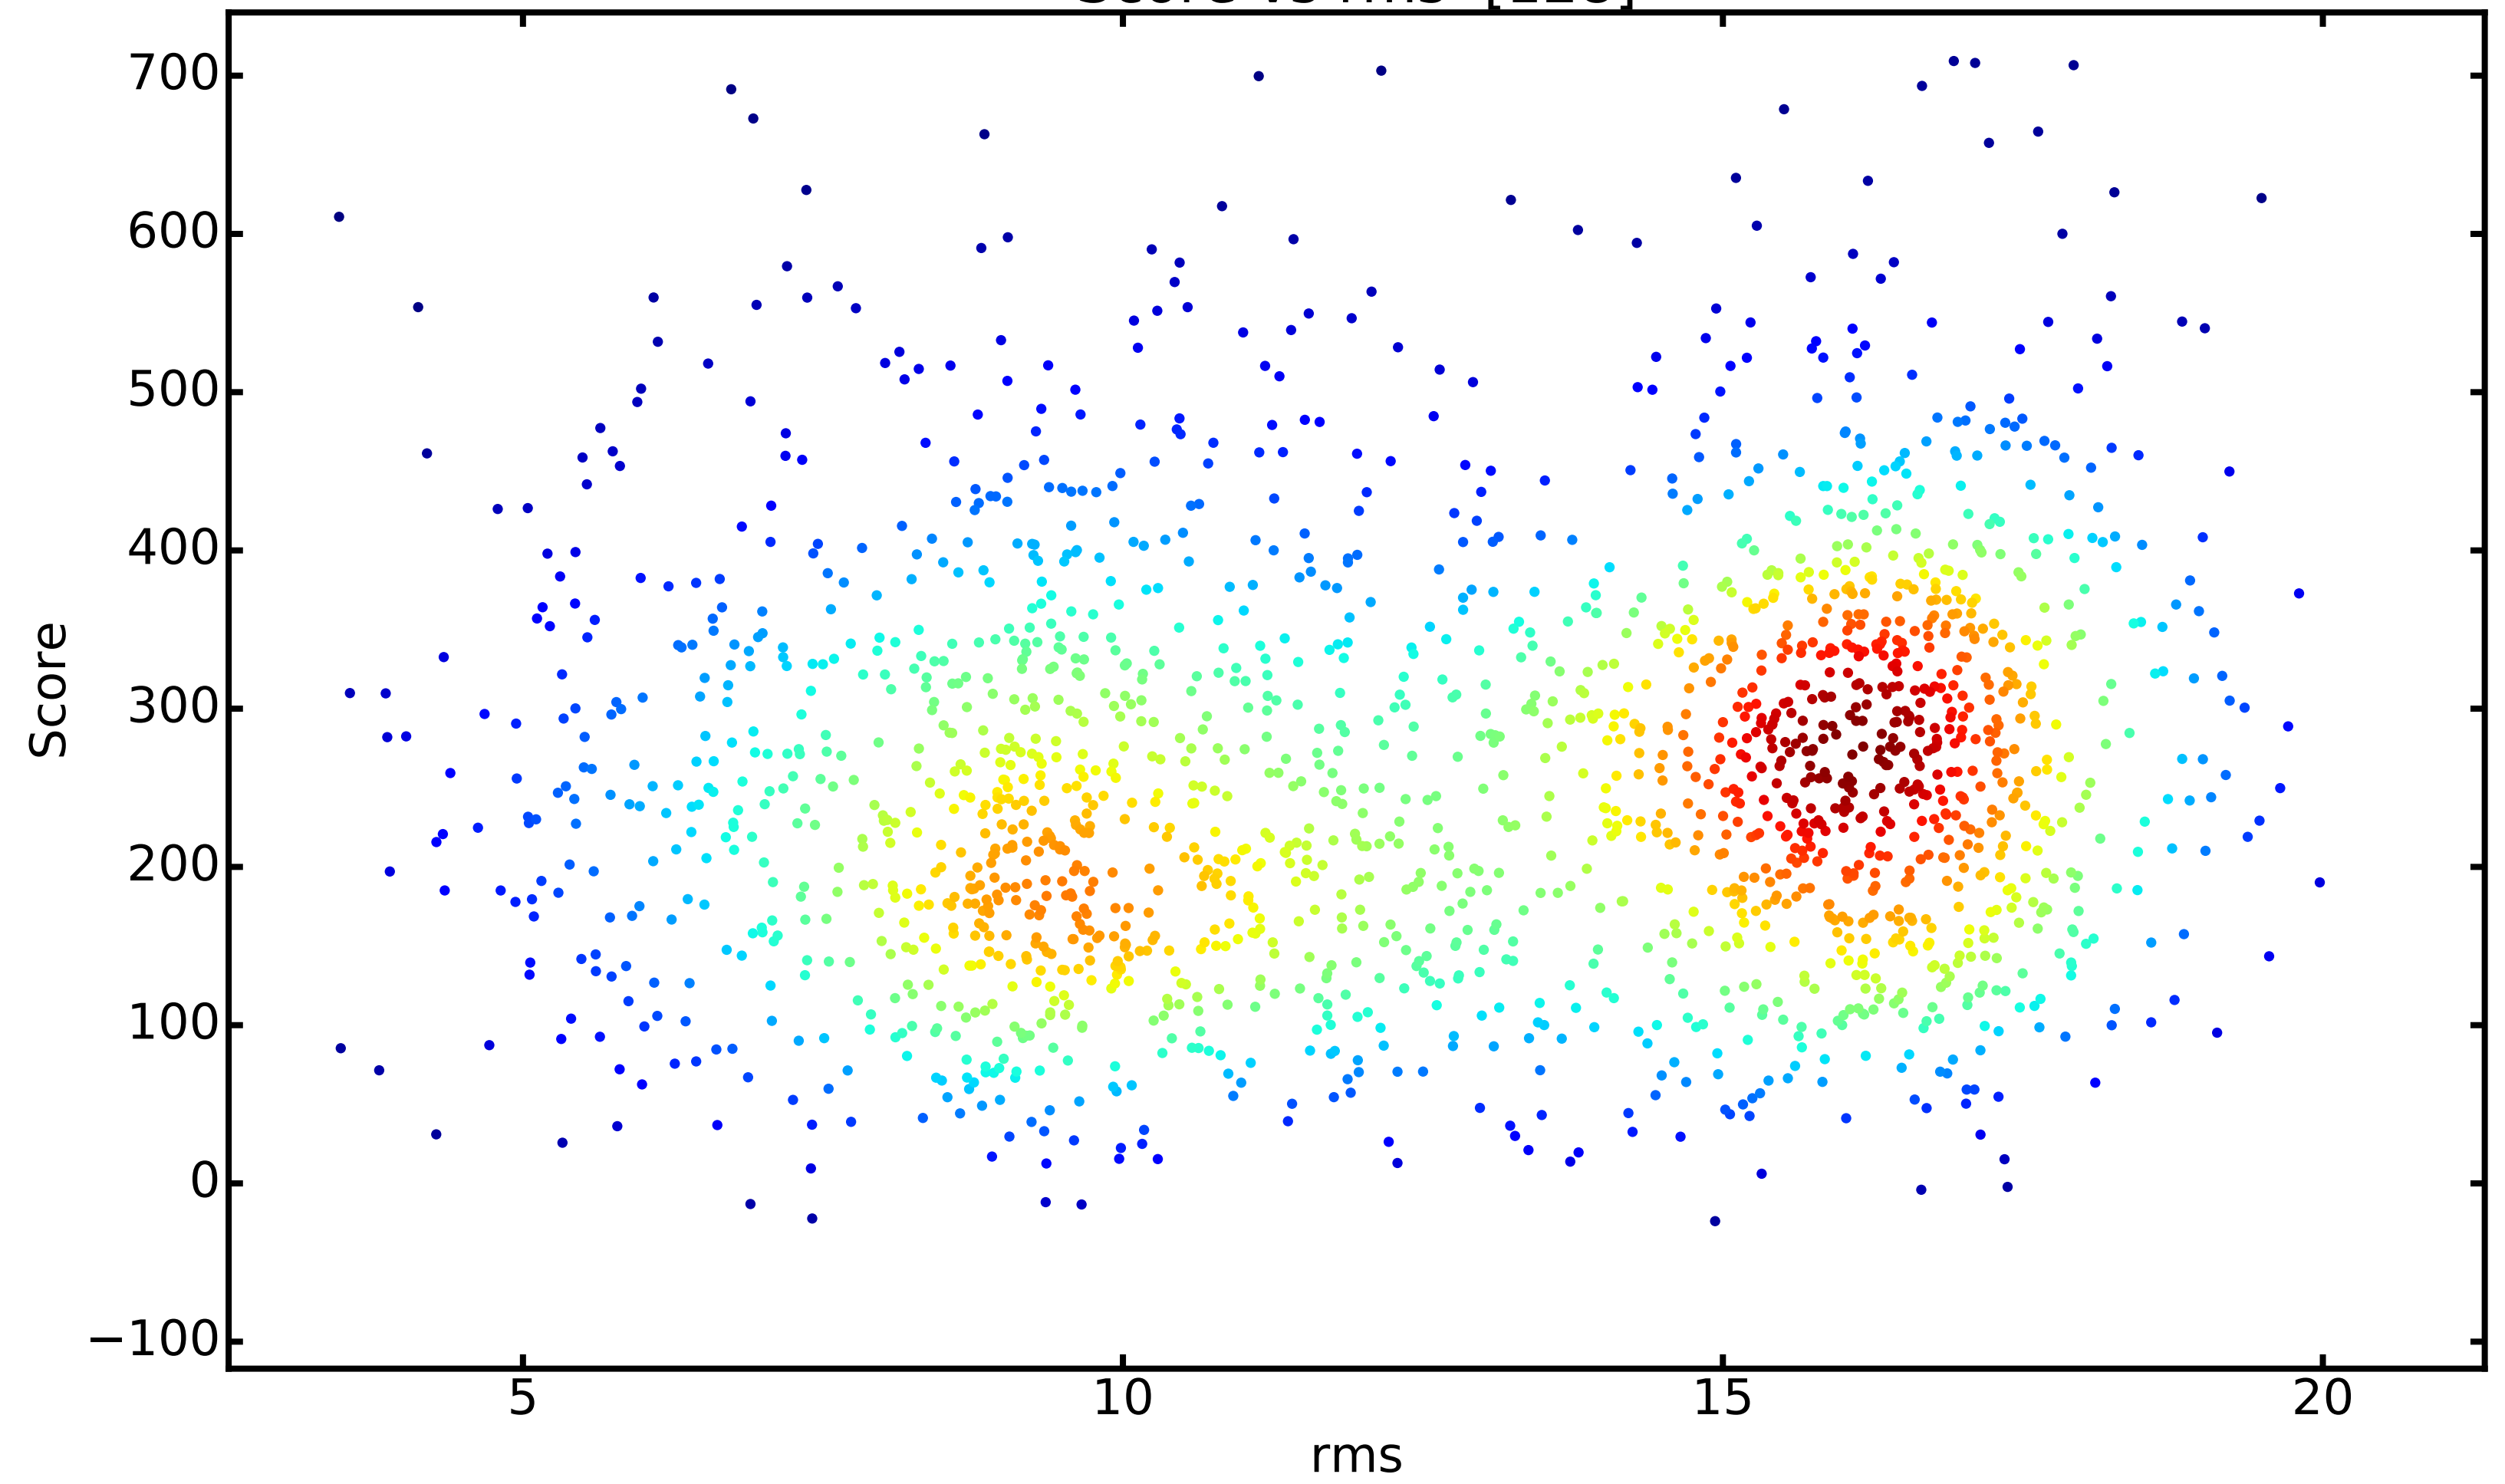

Score vs rms [129]

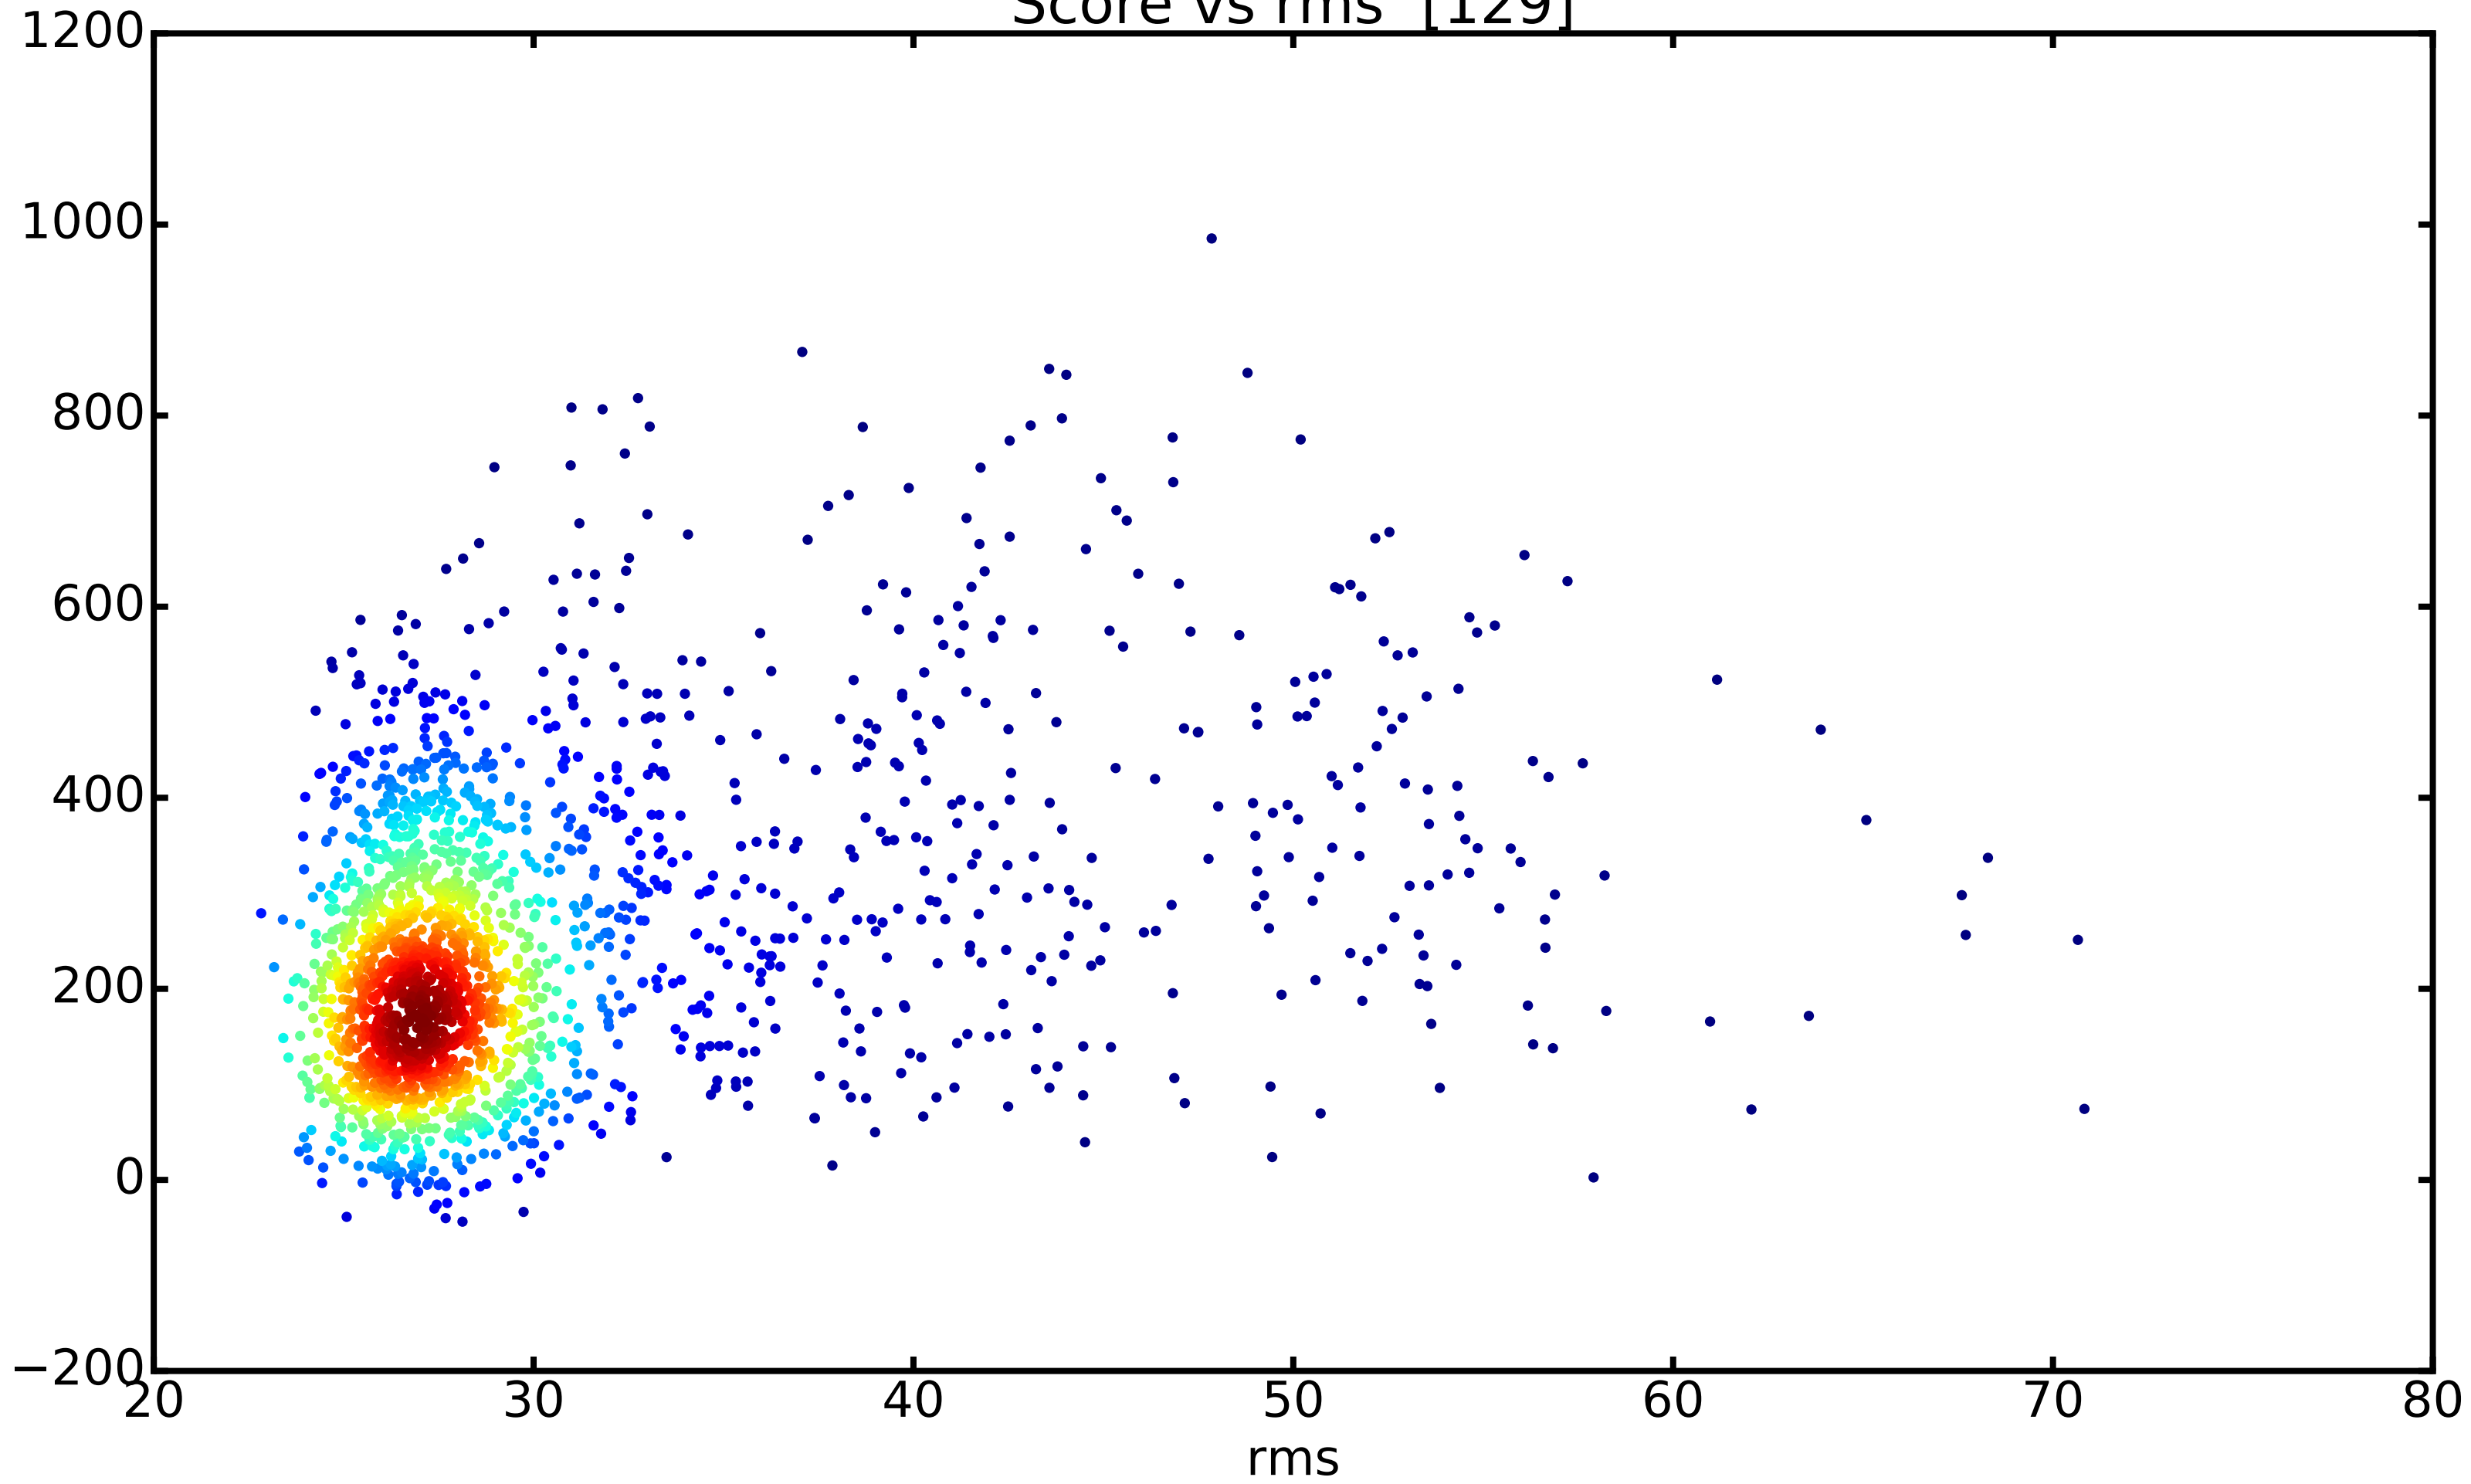

Score vs rms [129]

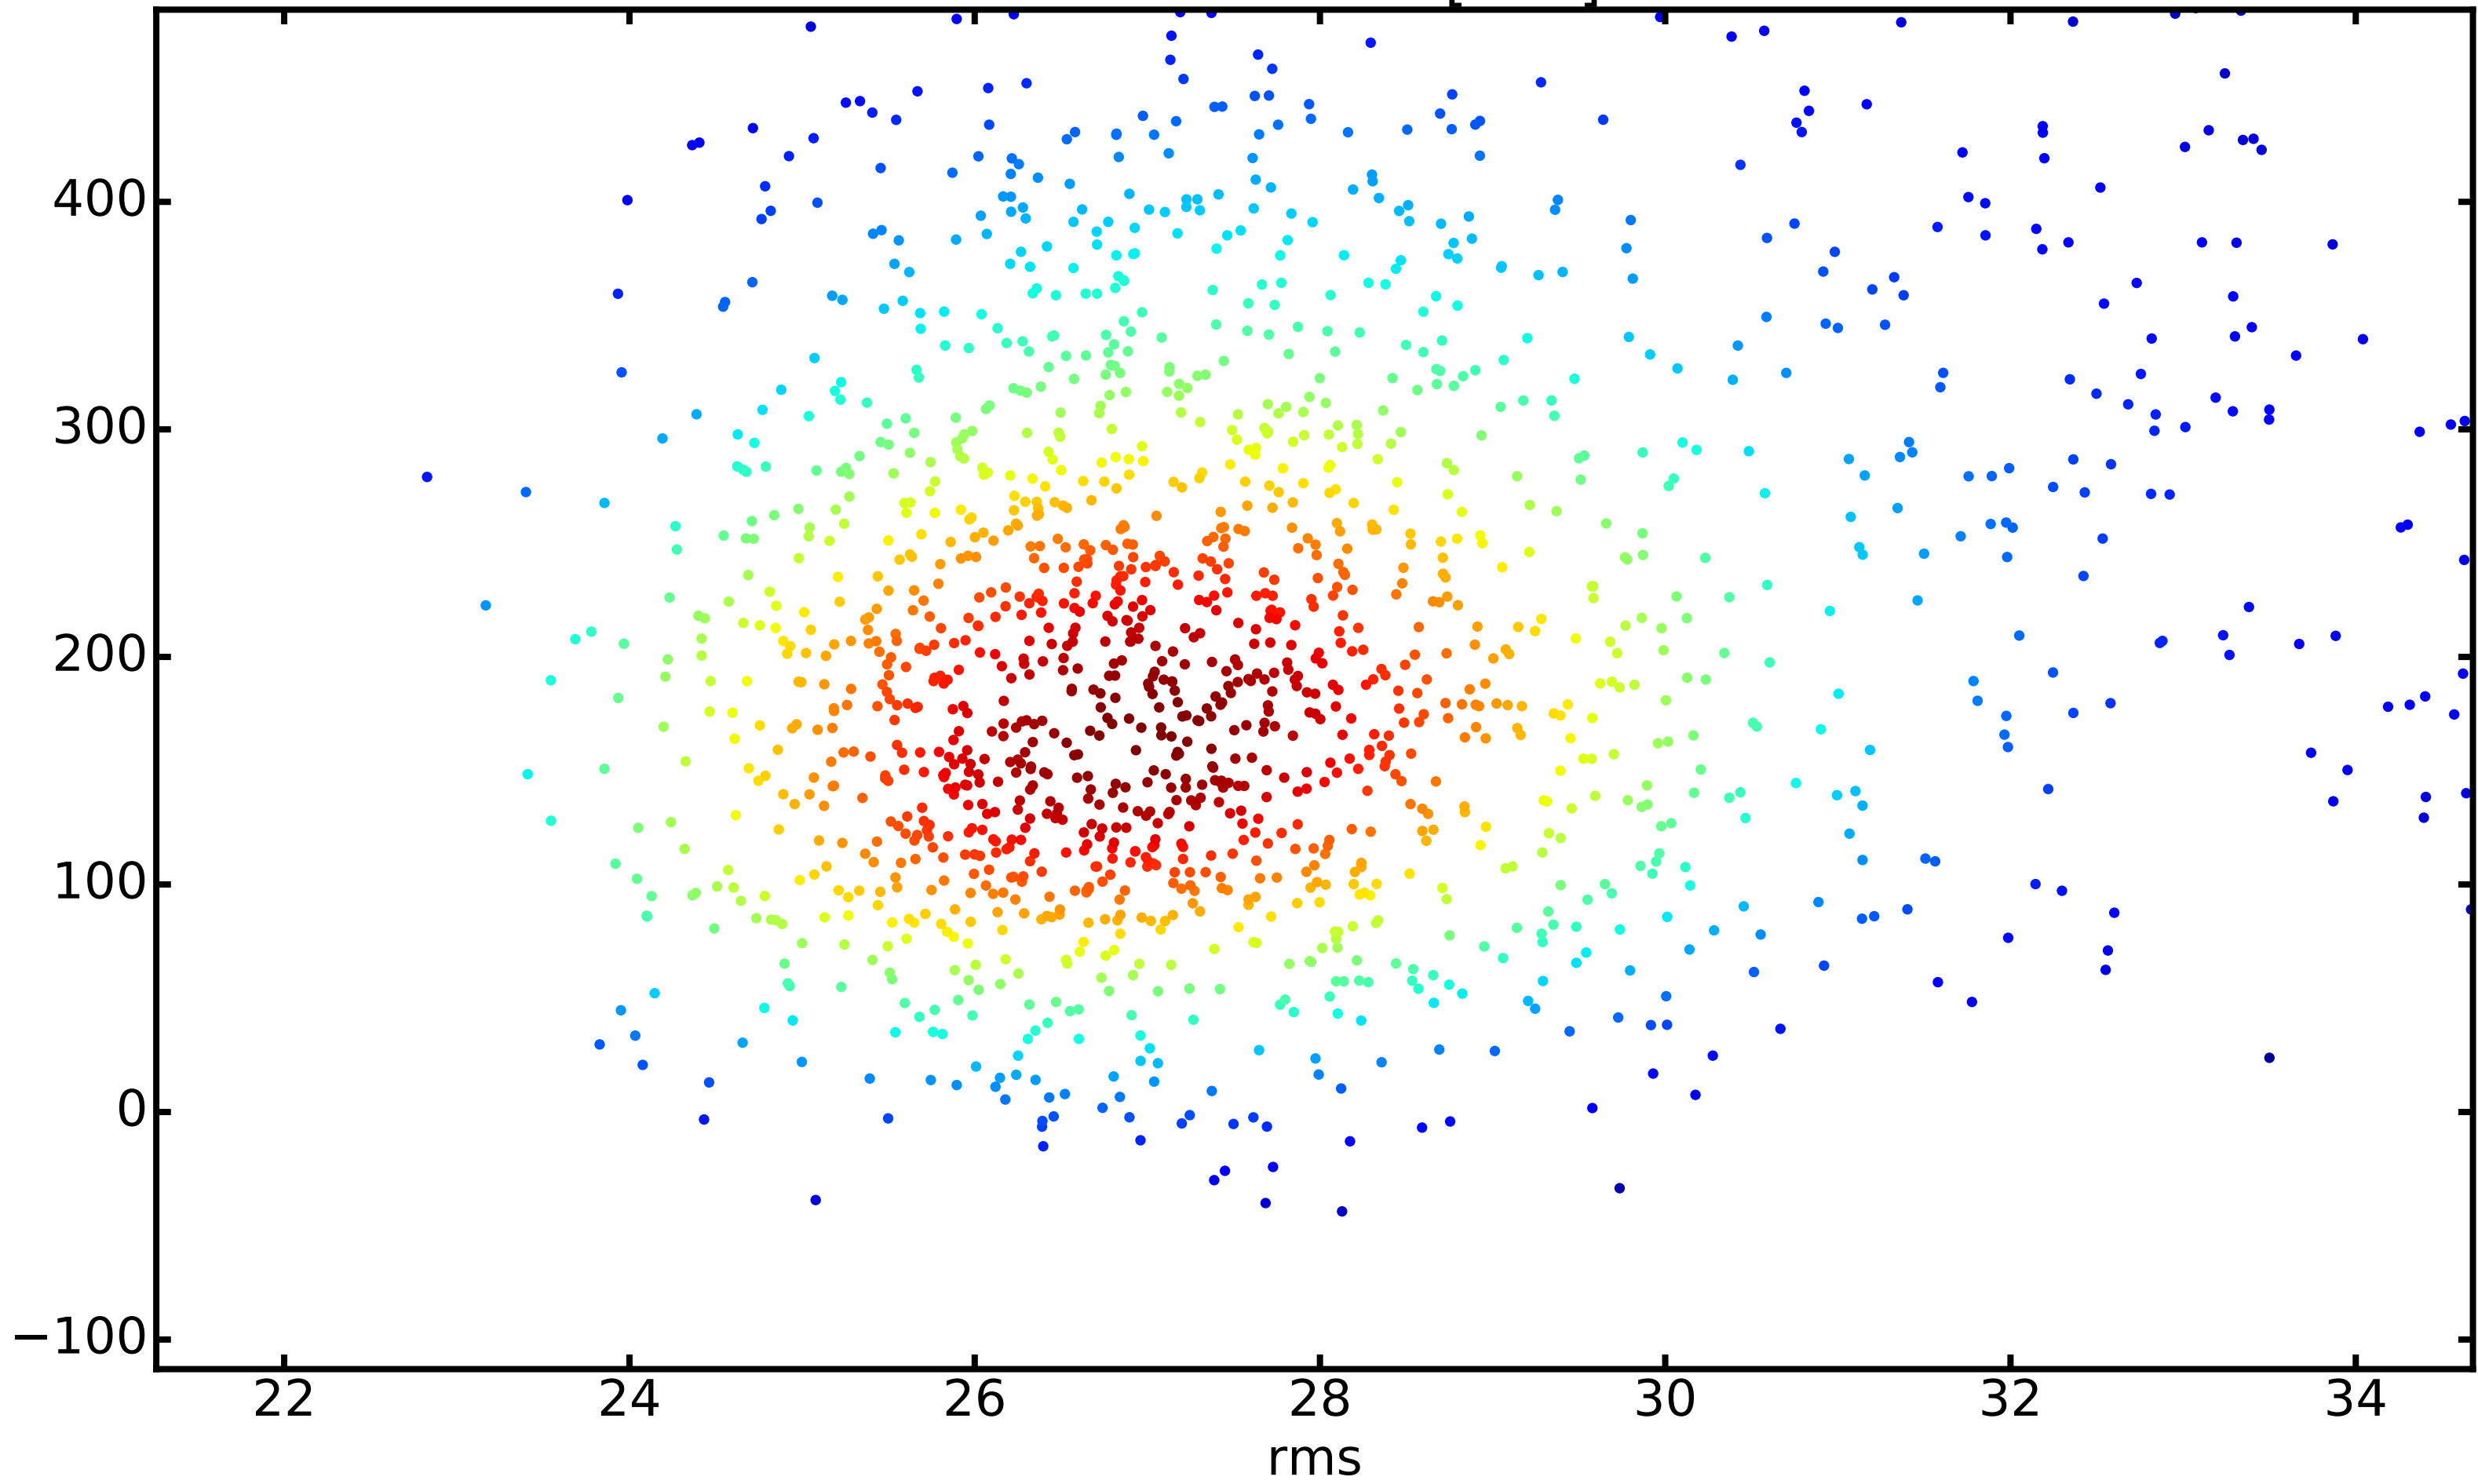

Score vs rms [148]

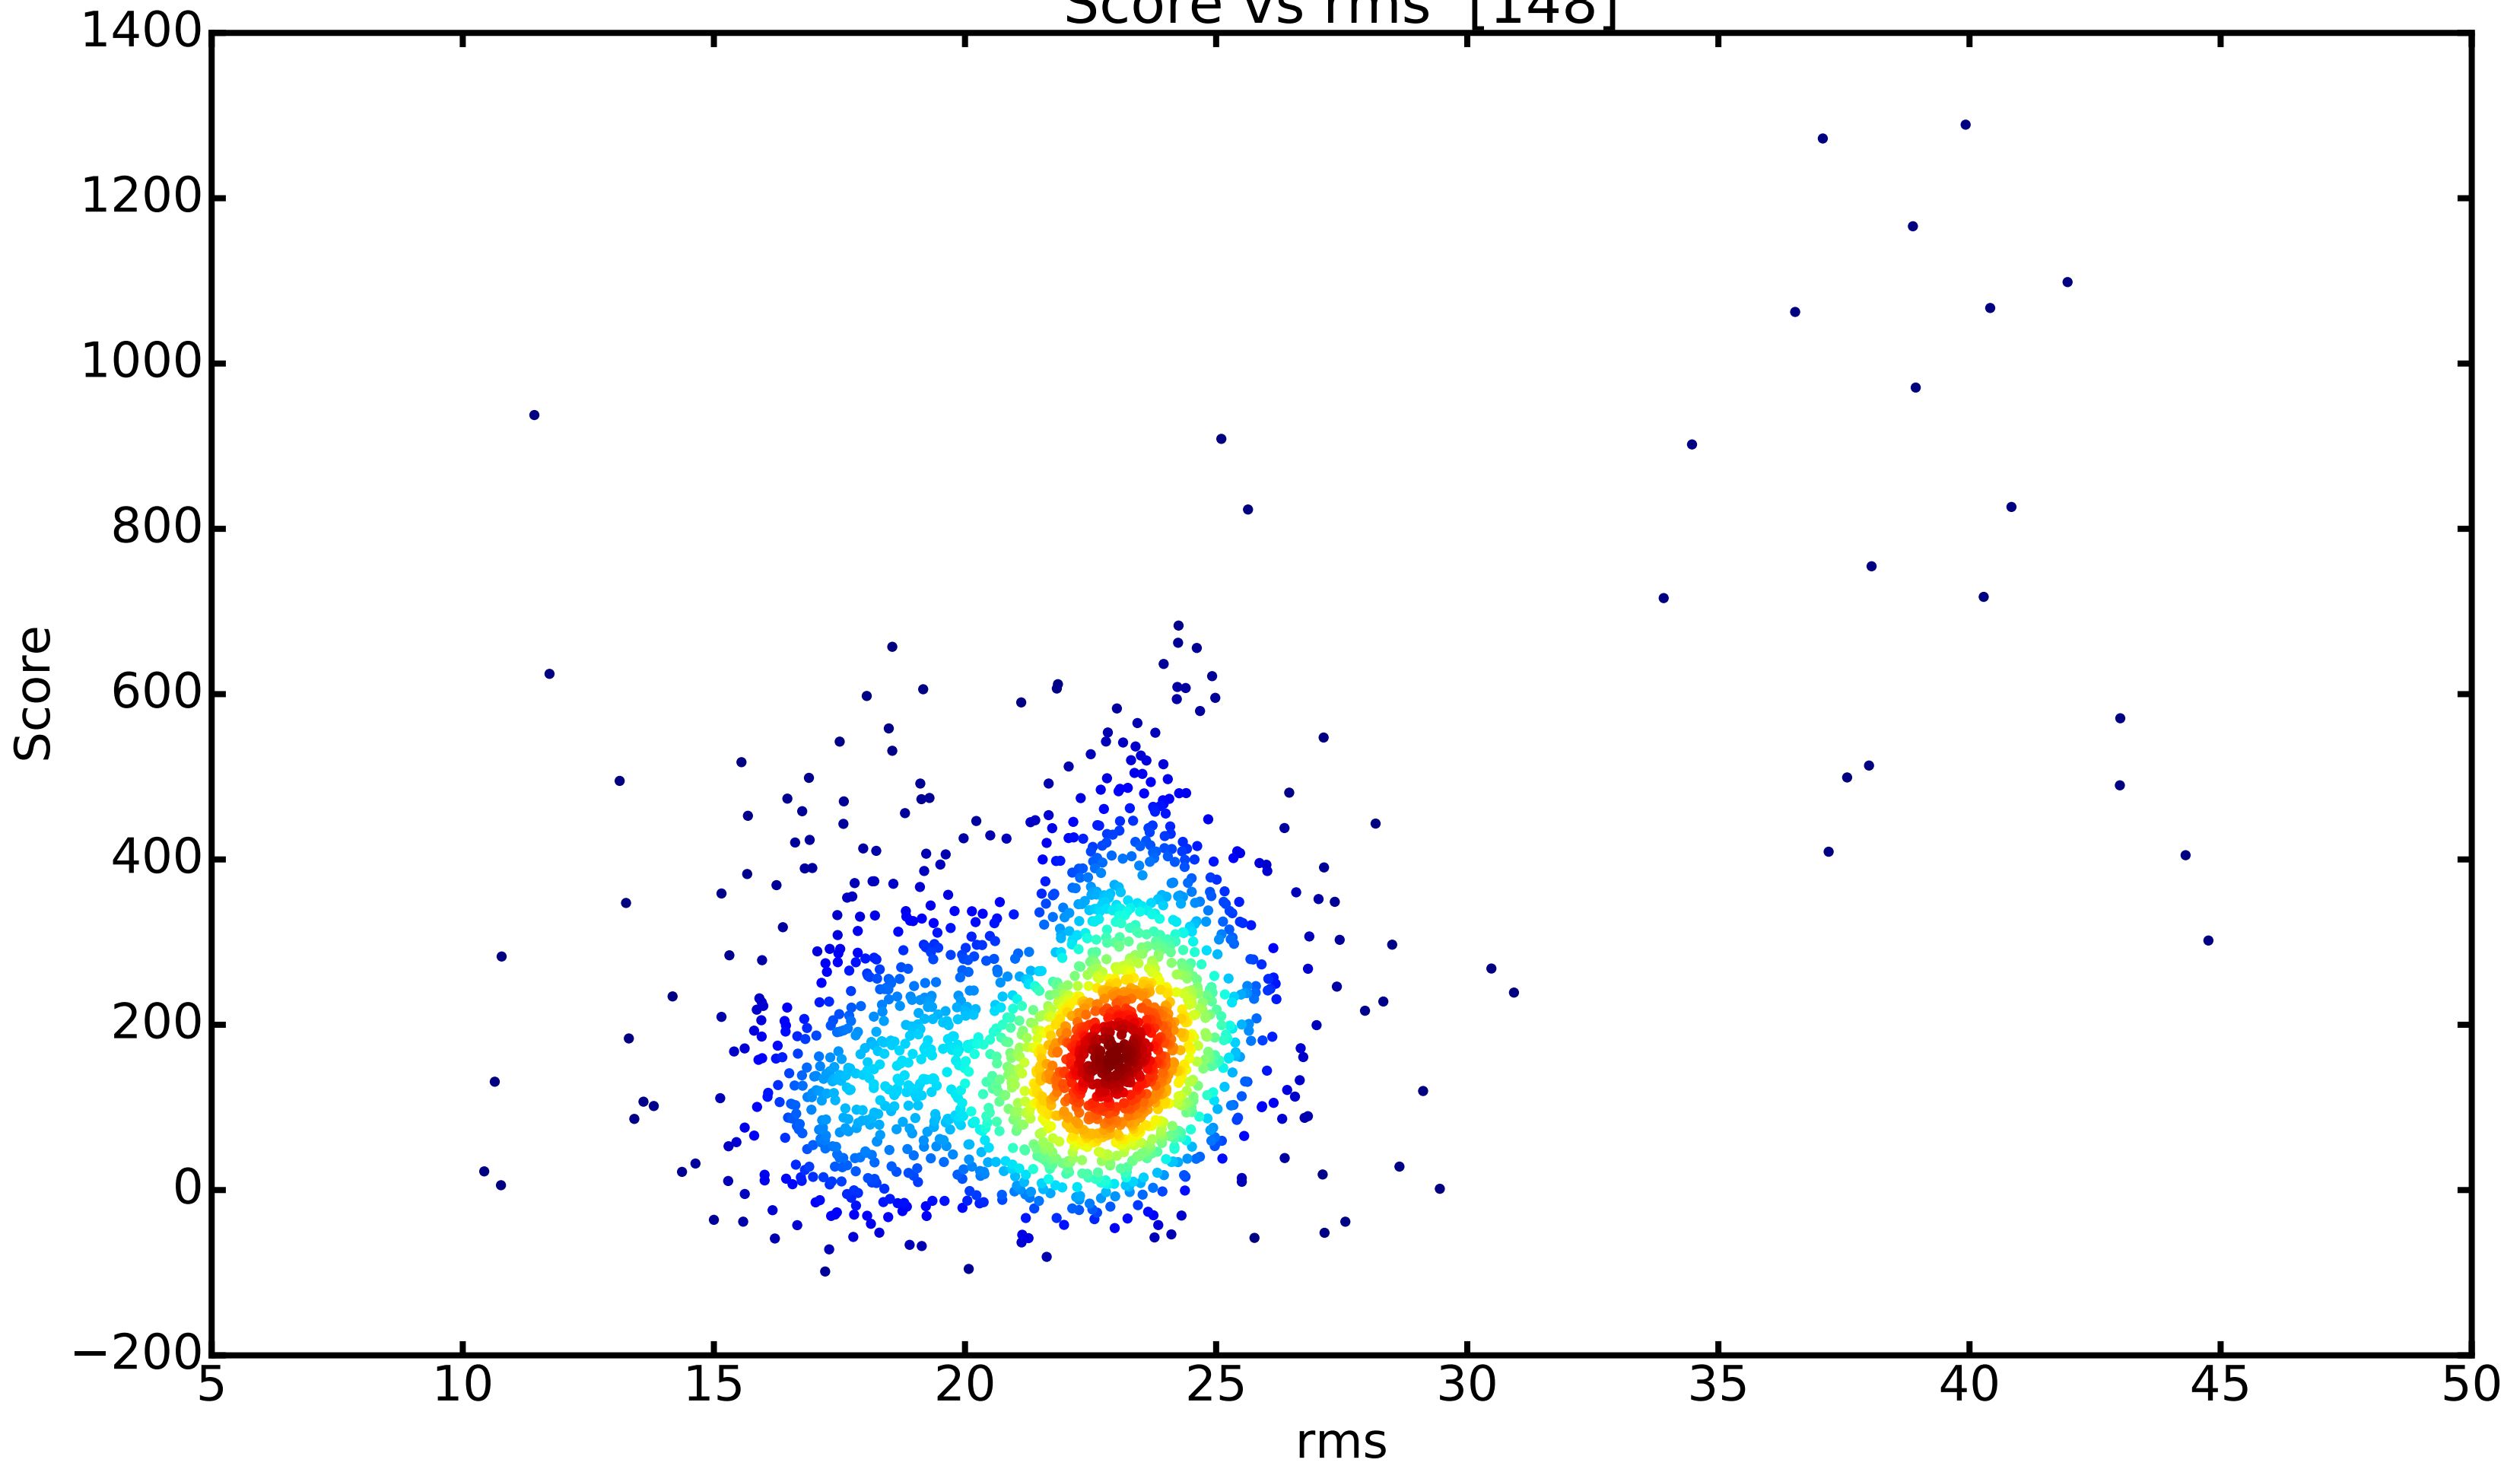

Score vs rms [148]

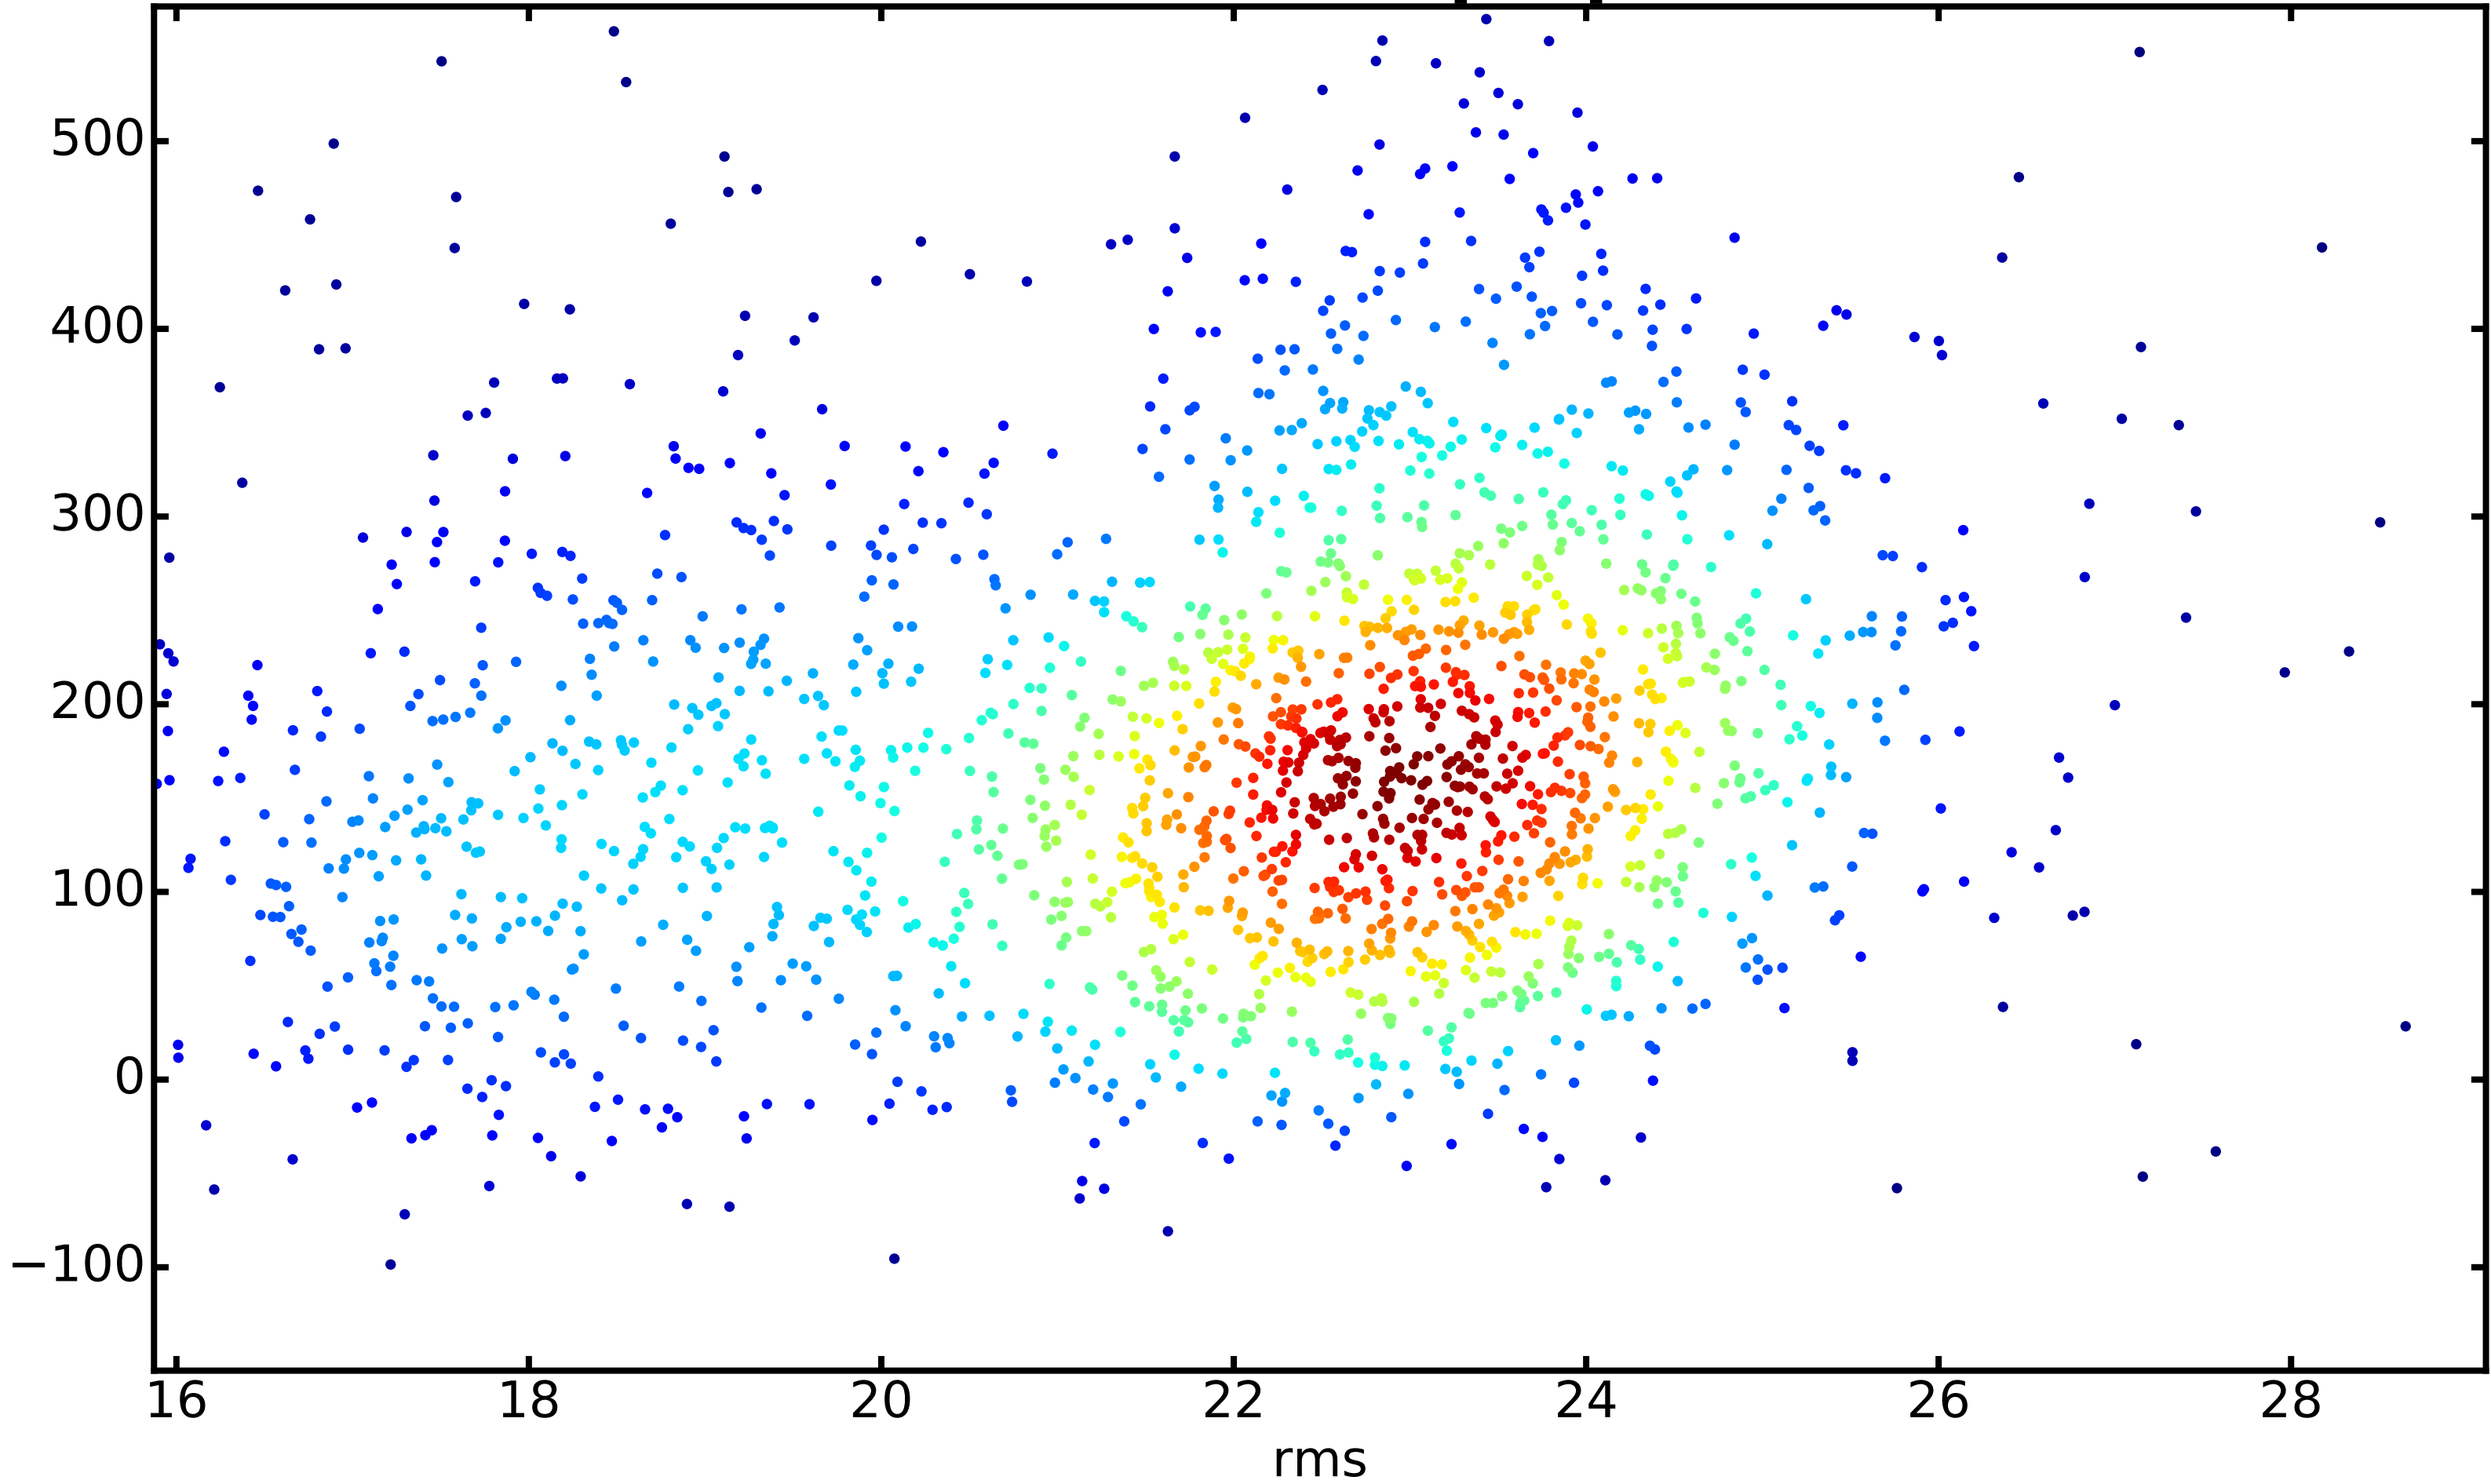

Score vs rms [149]

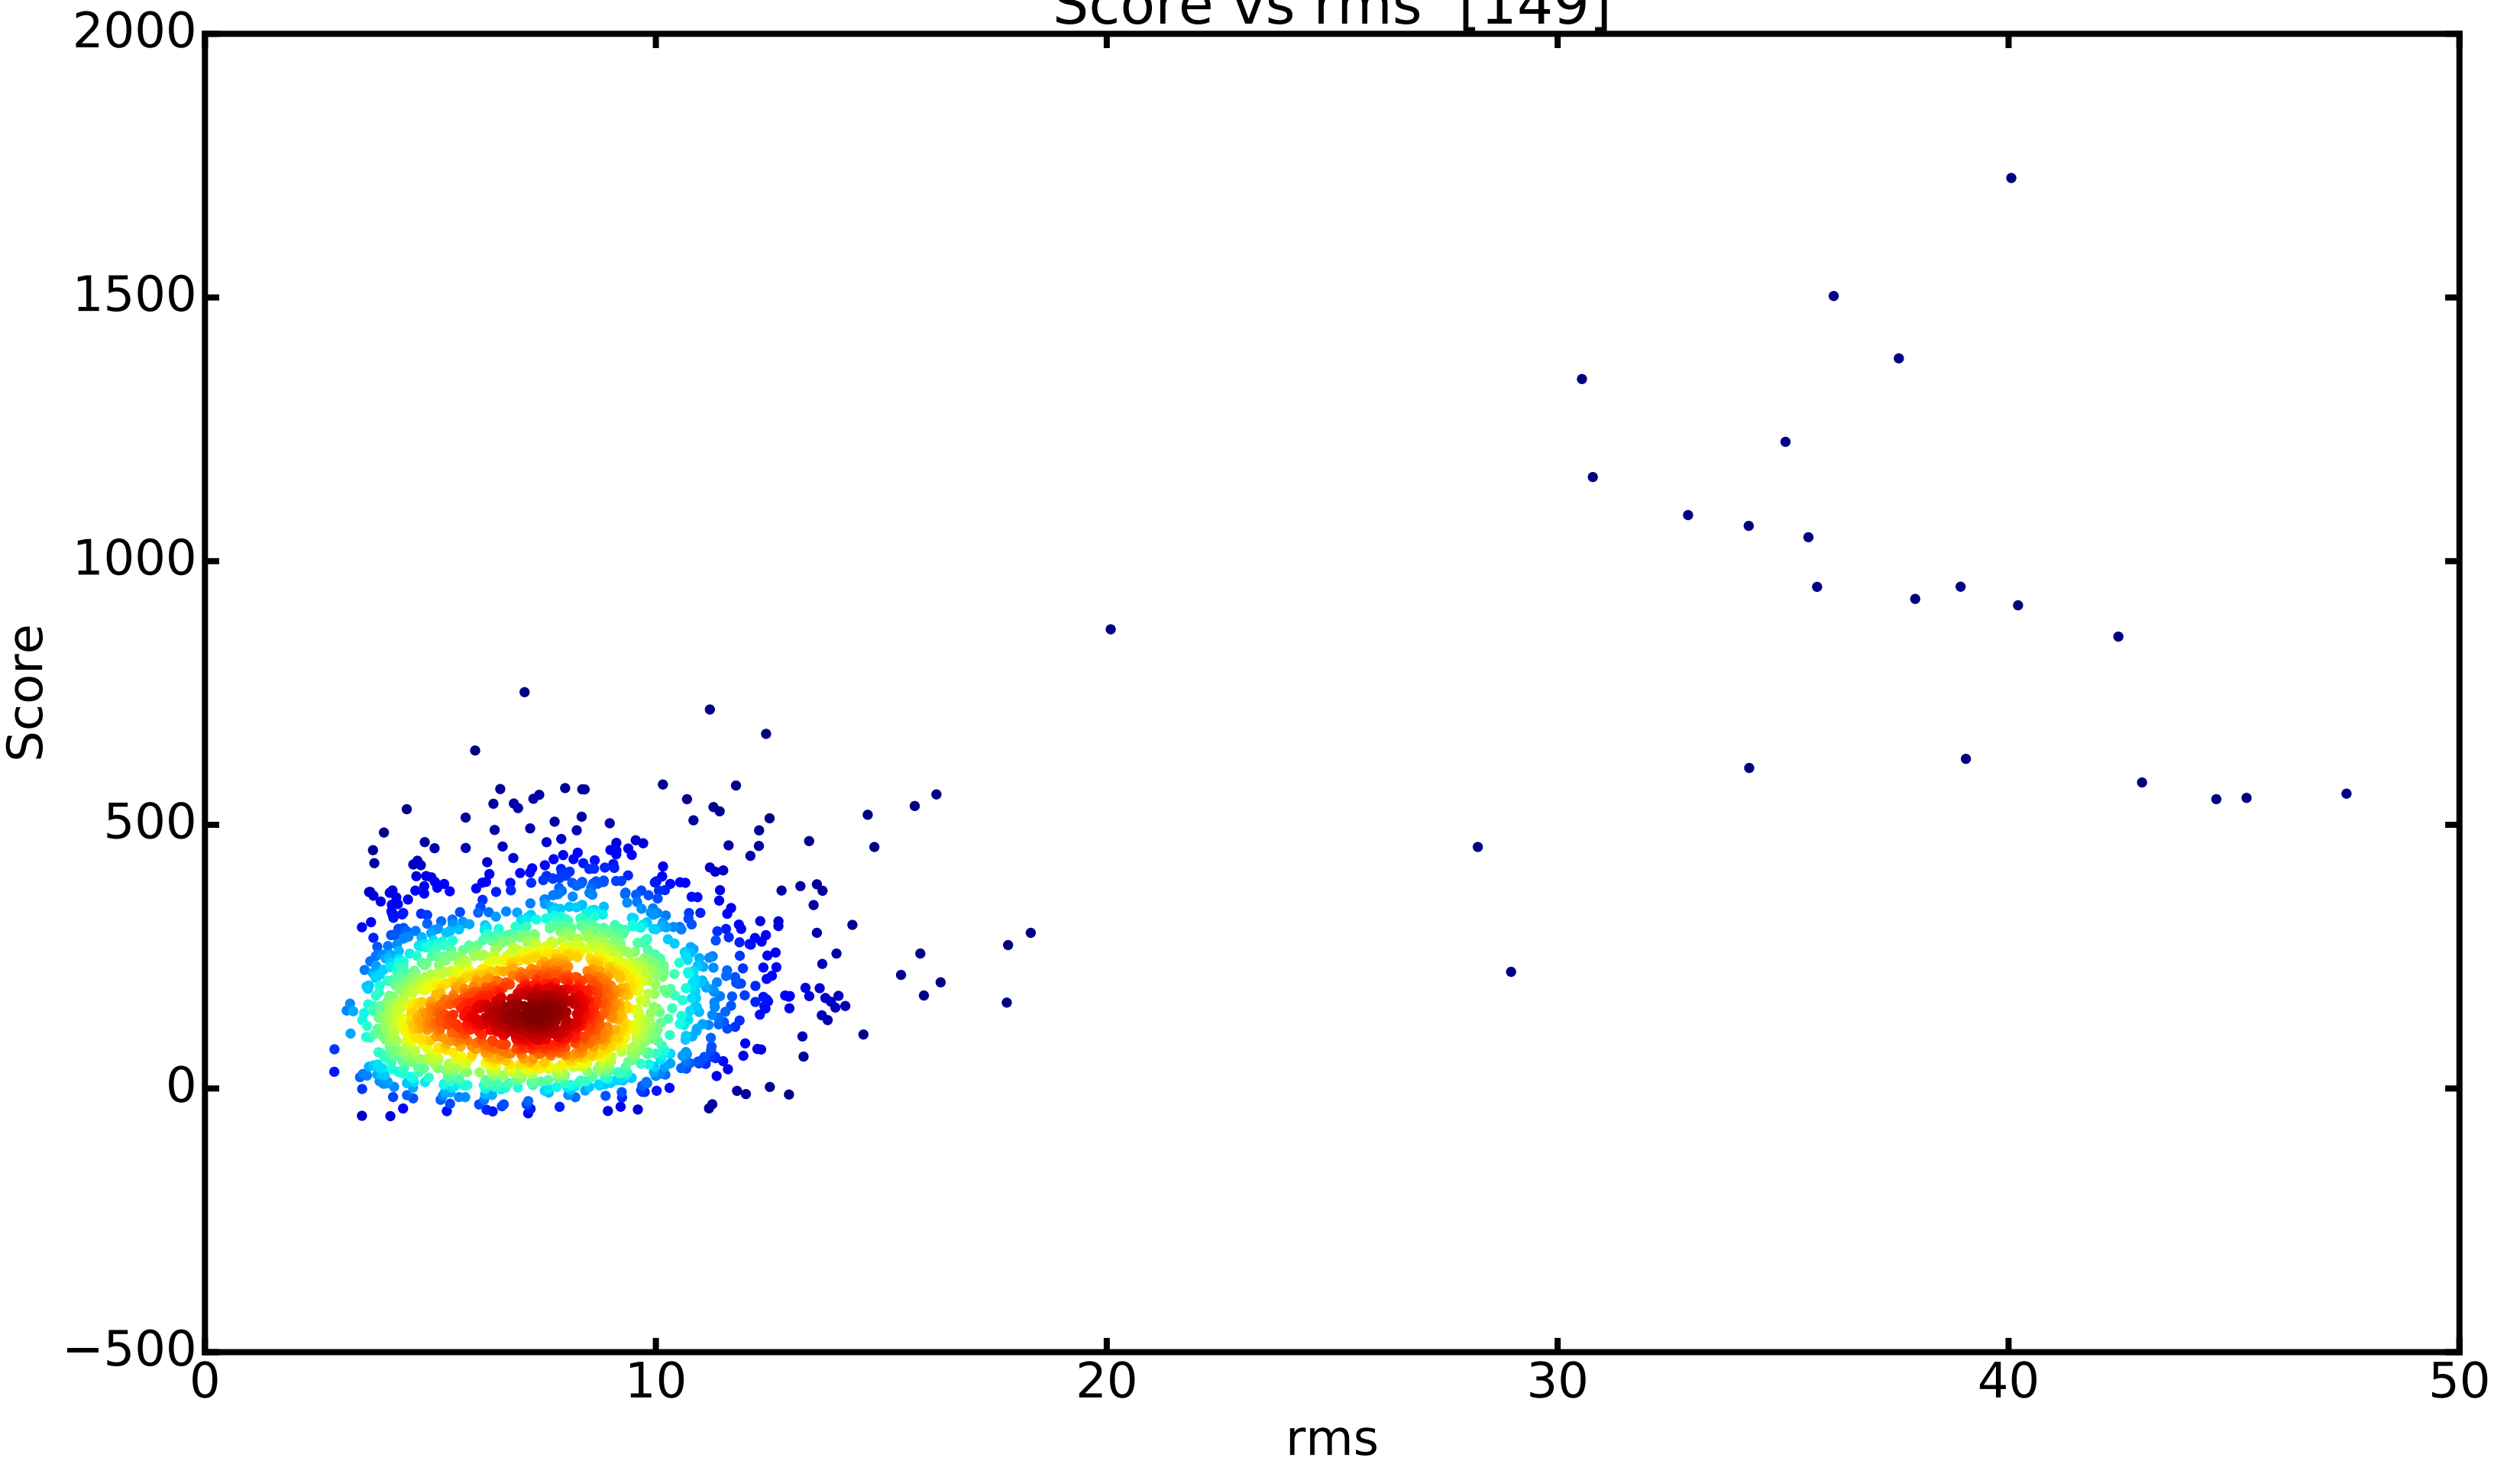

Score vs rms [149]

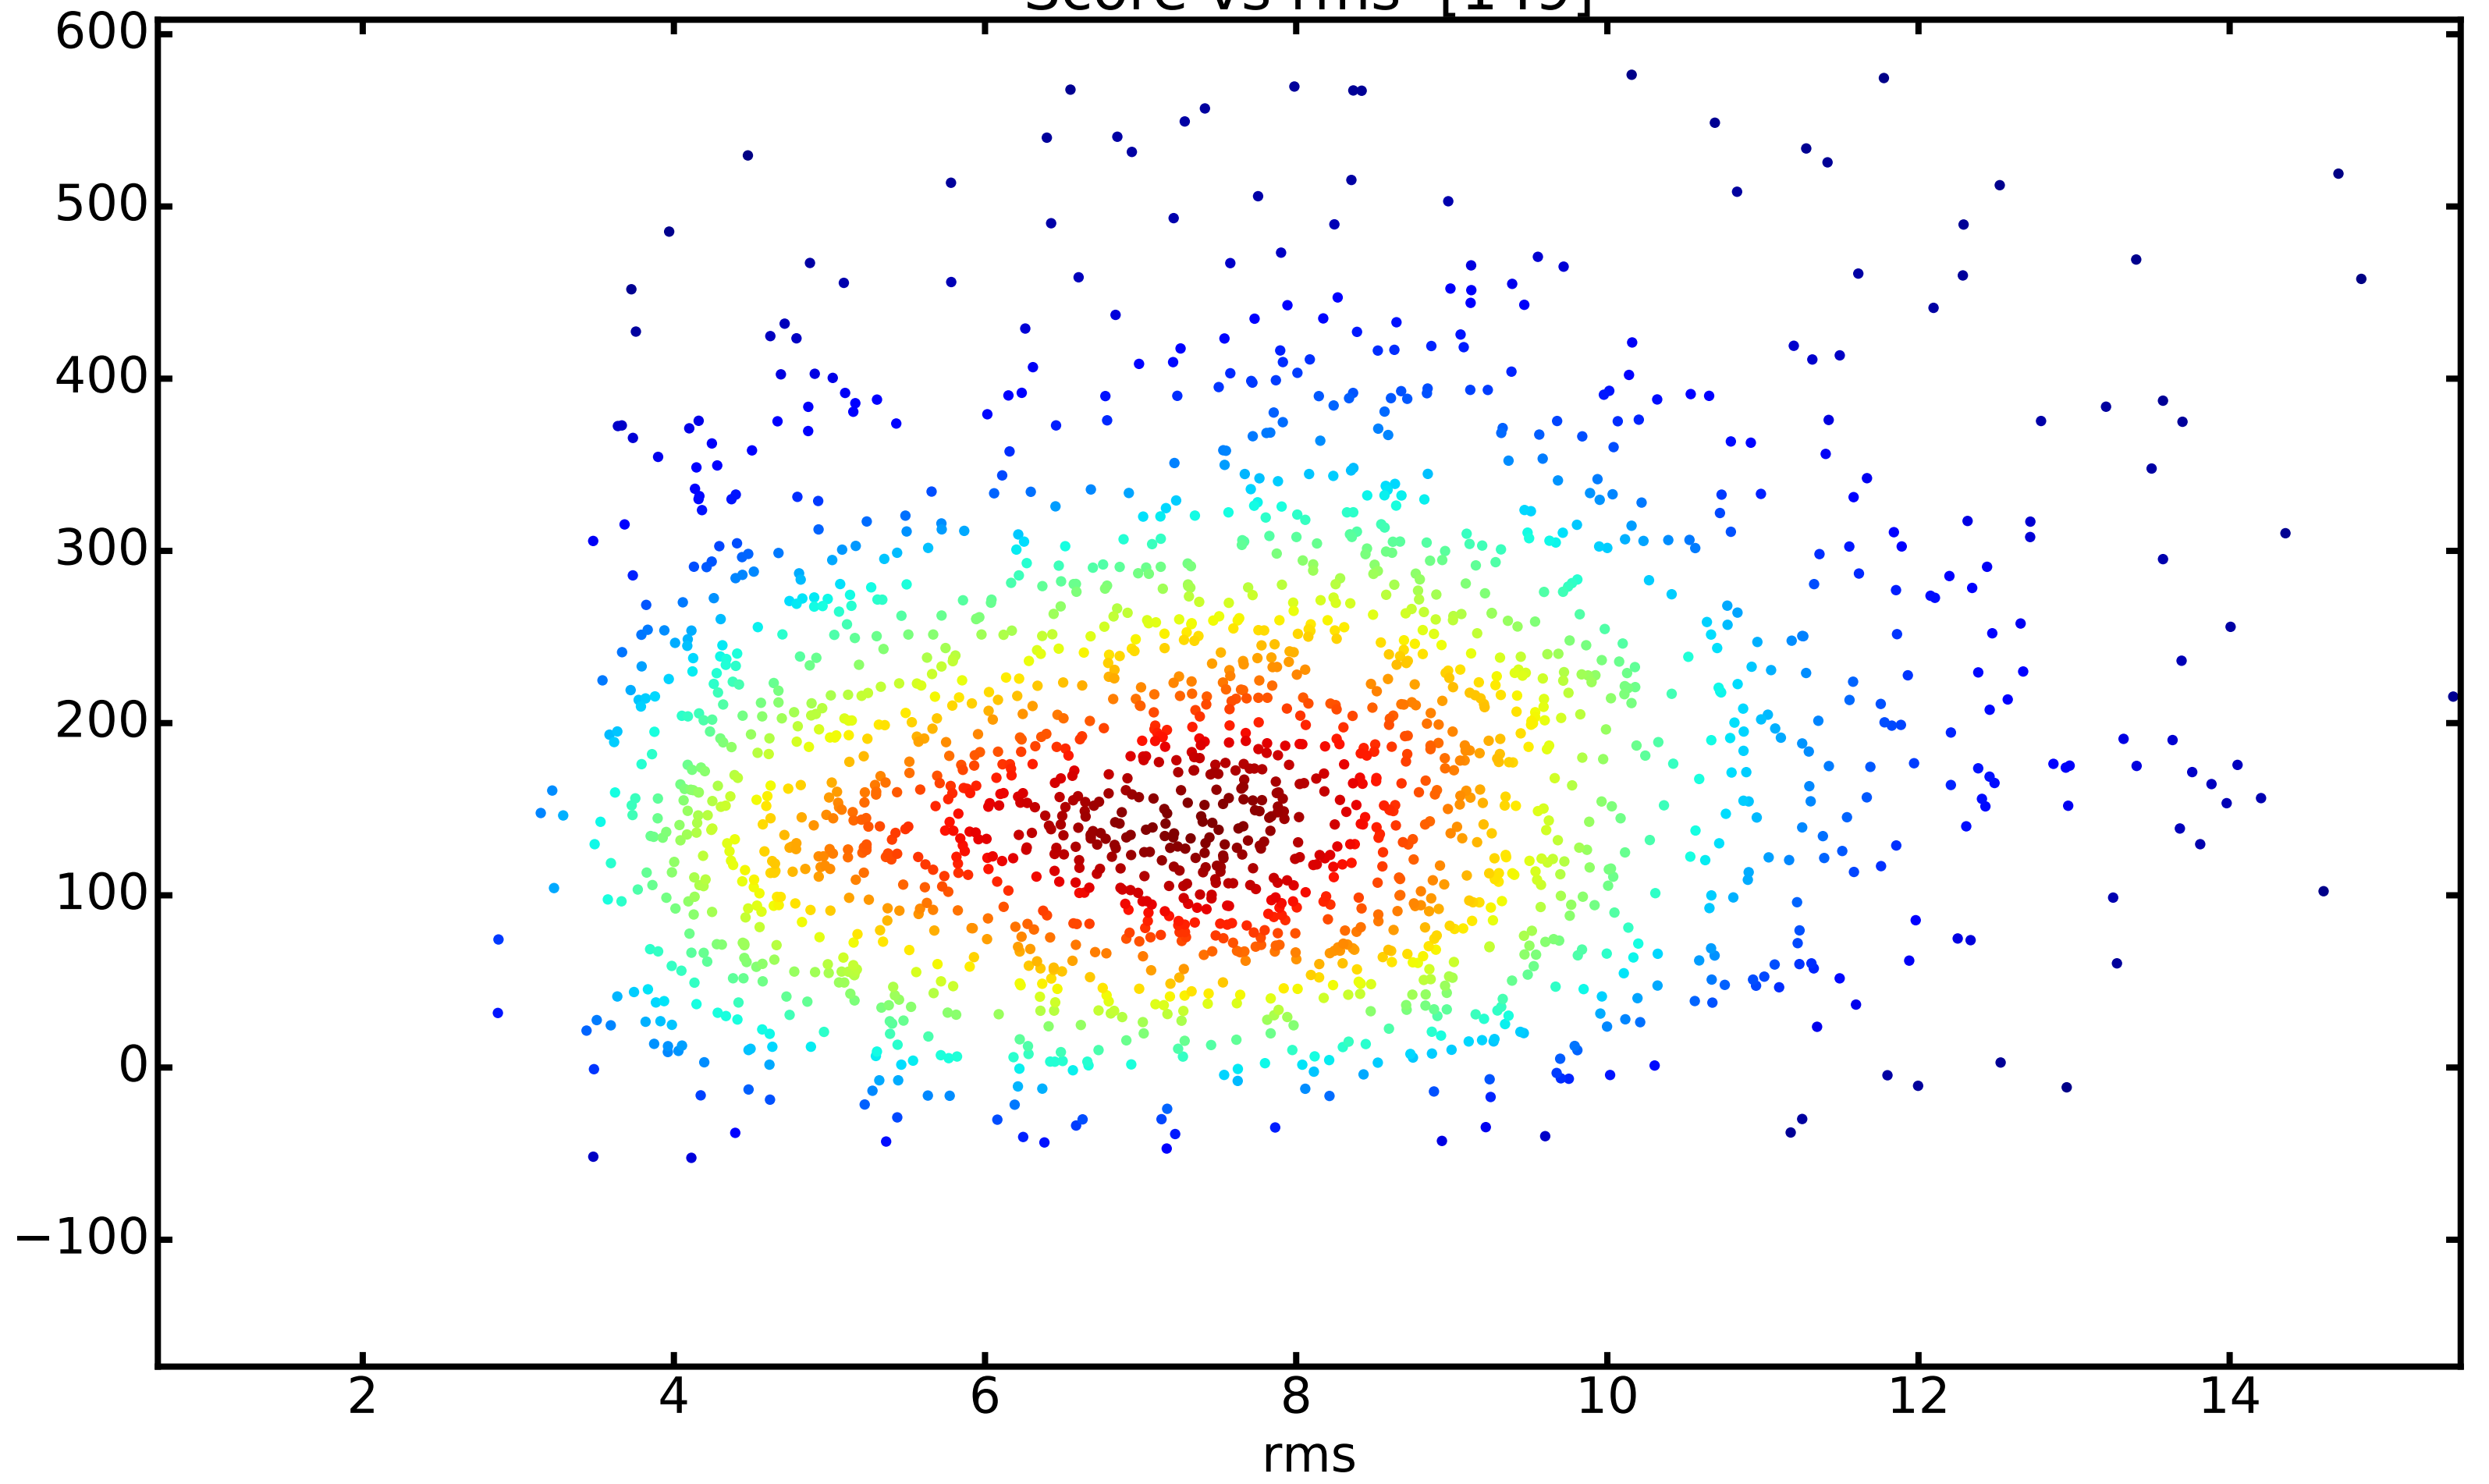

Score vs rms [150]

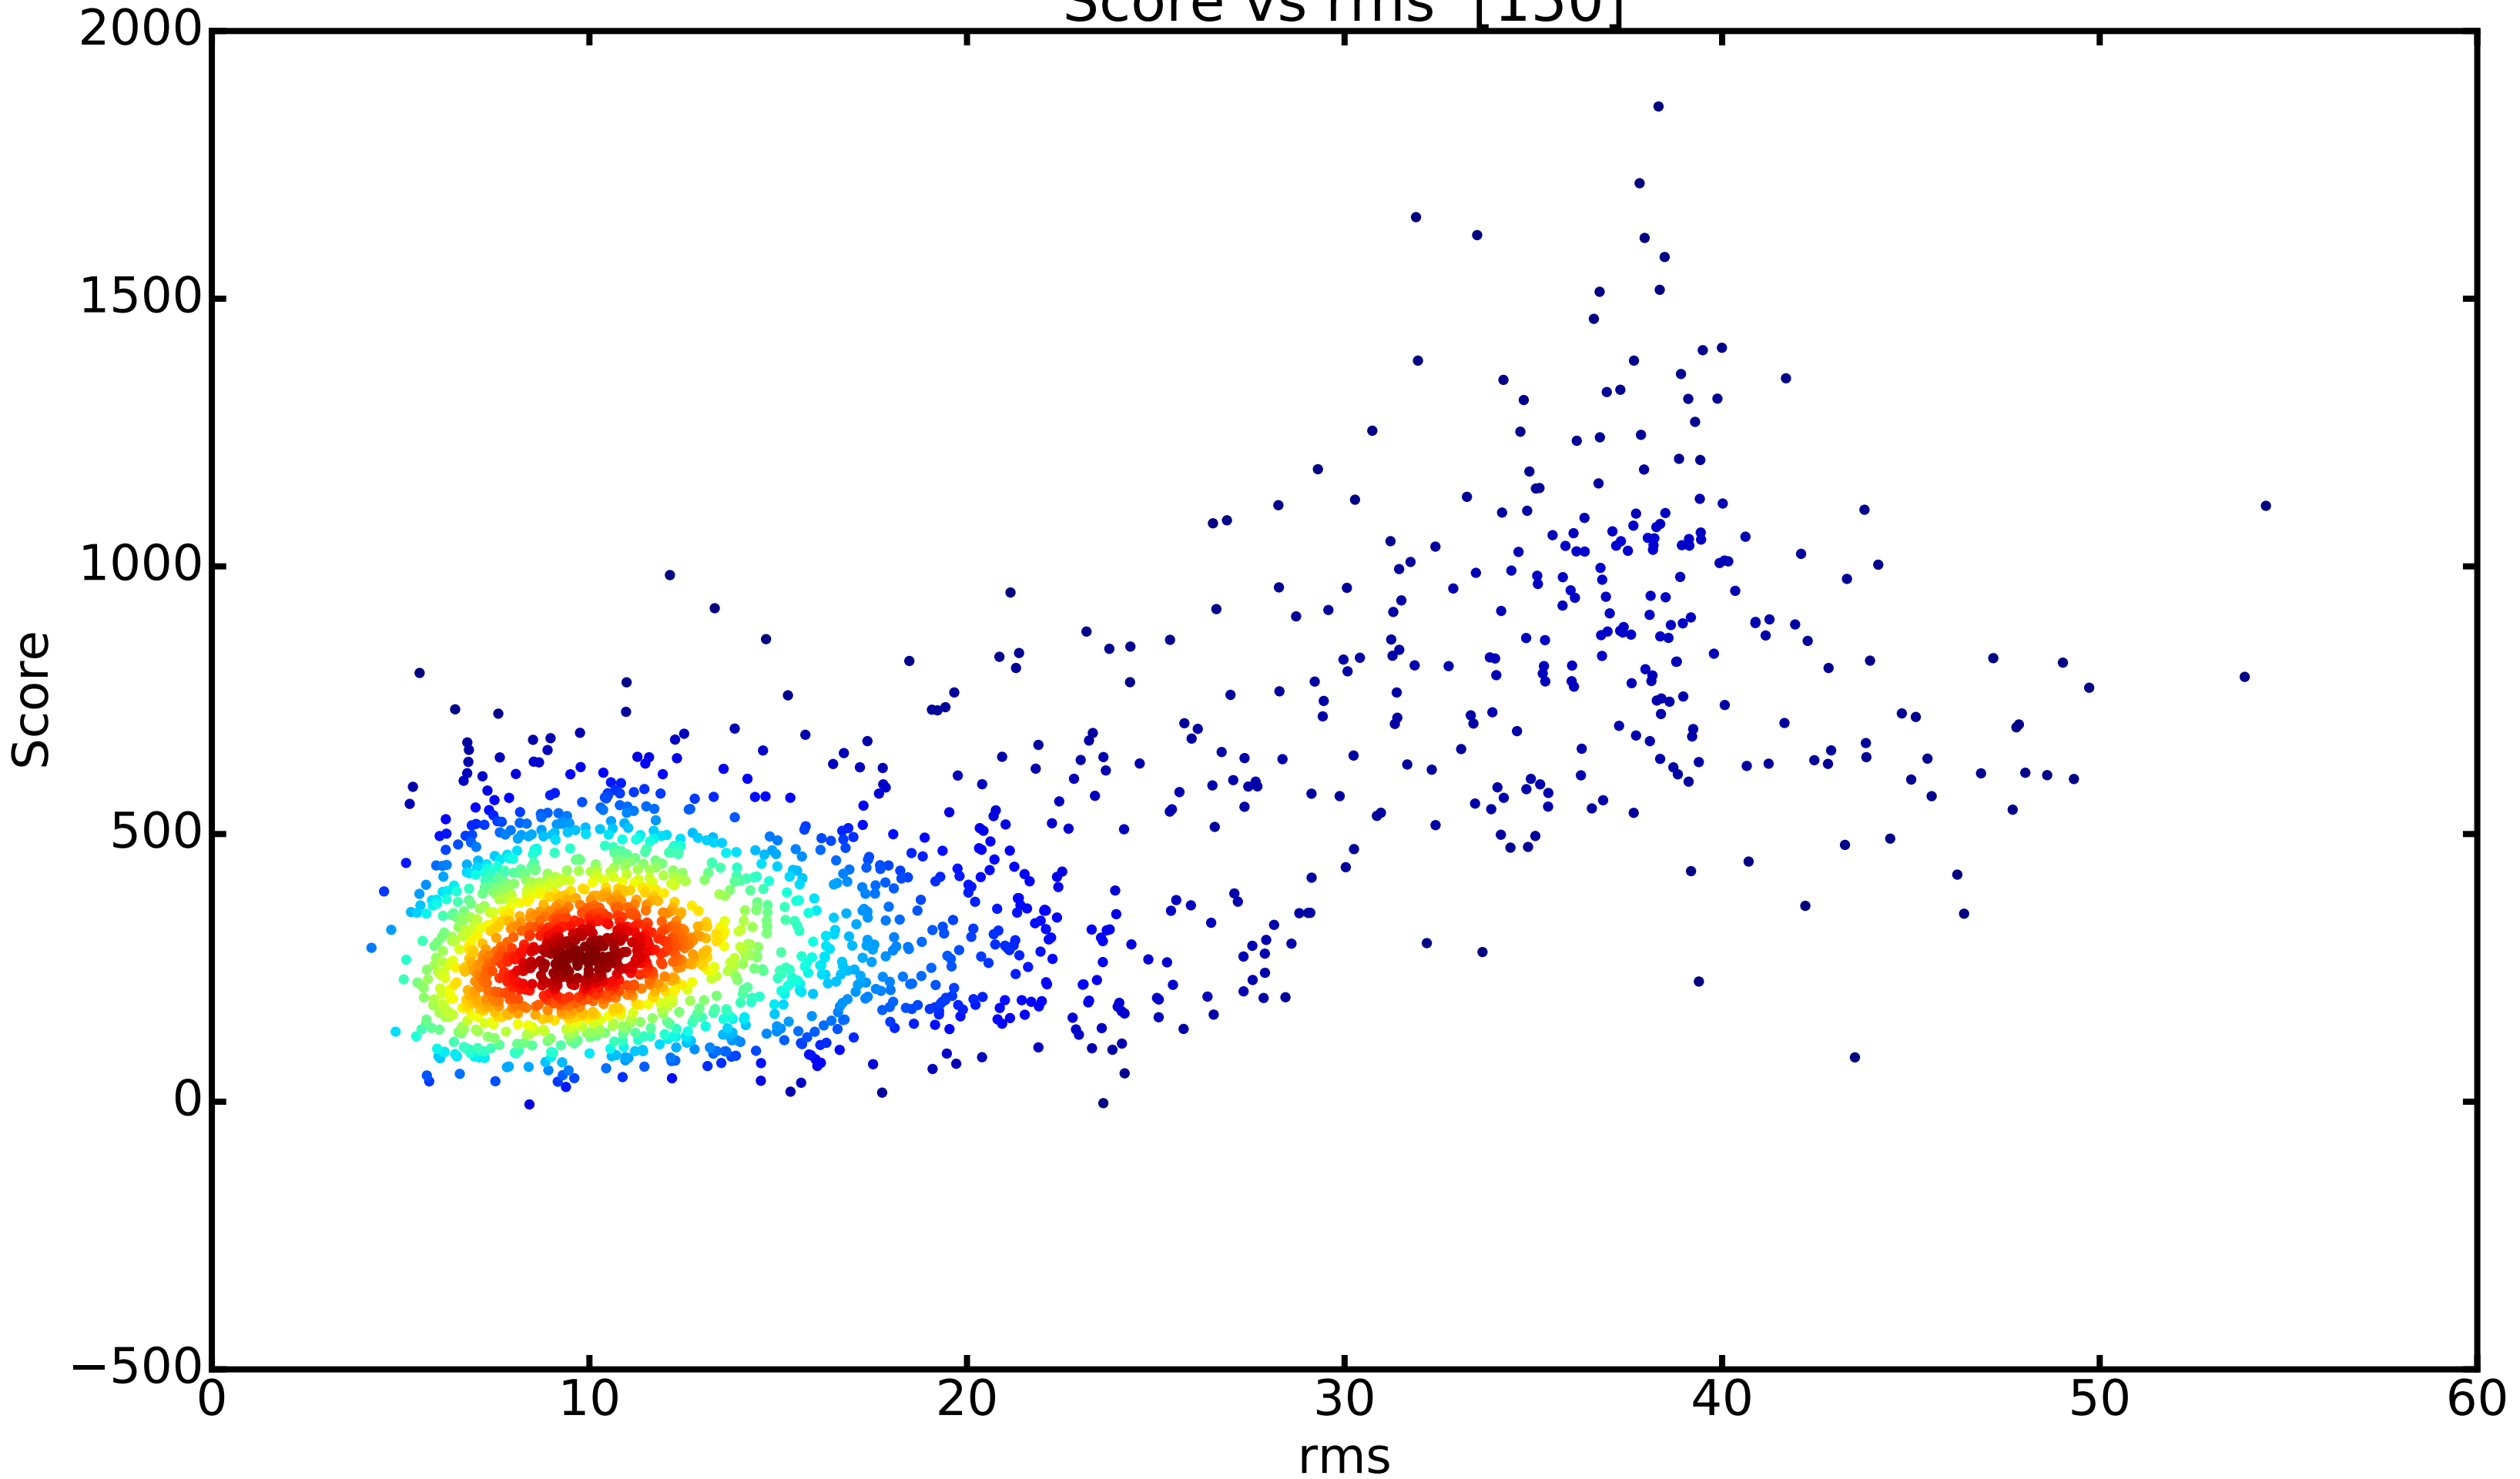



Score vs rms [150]

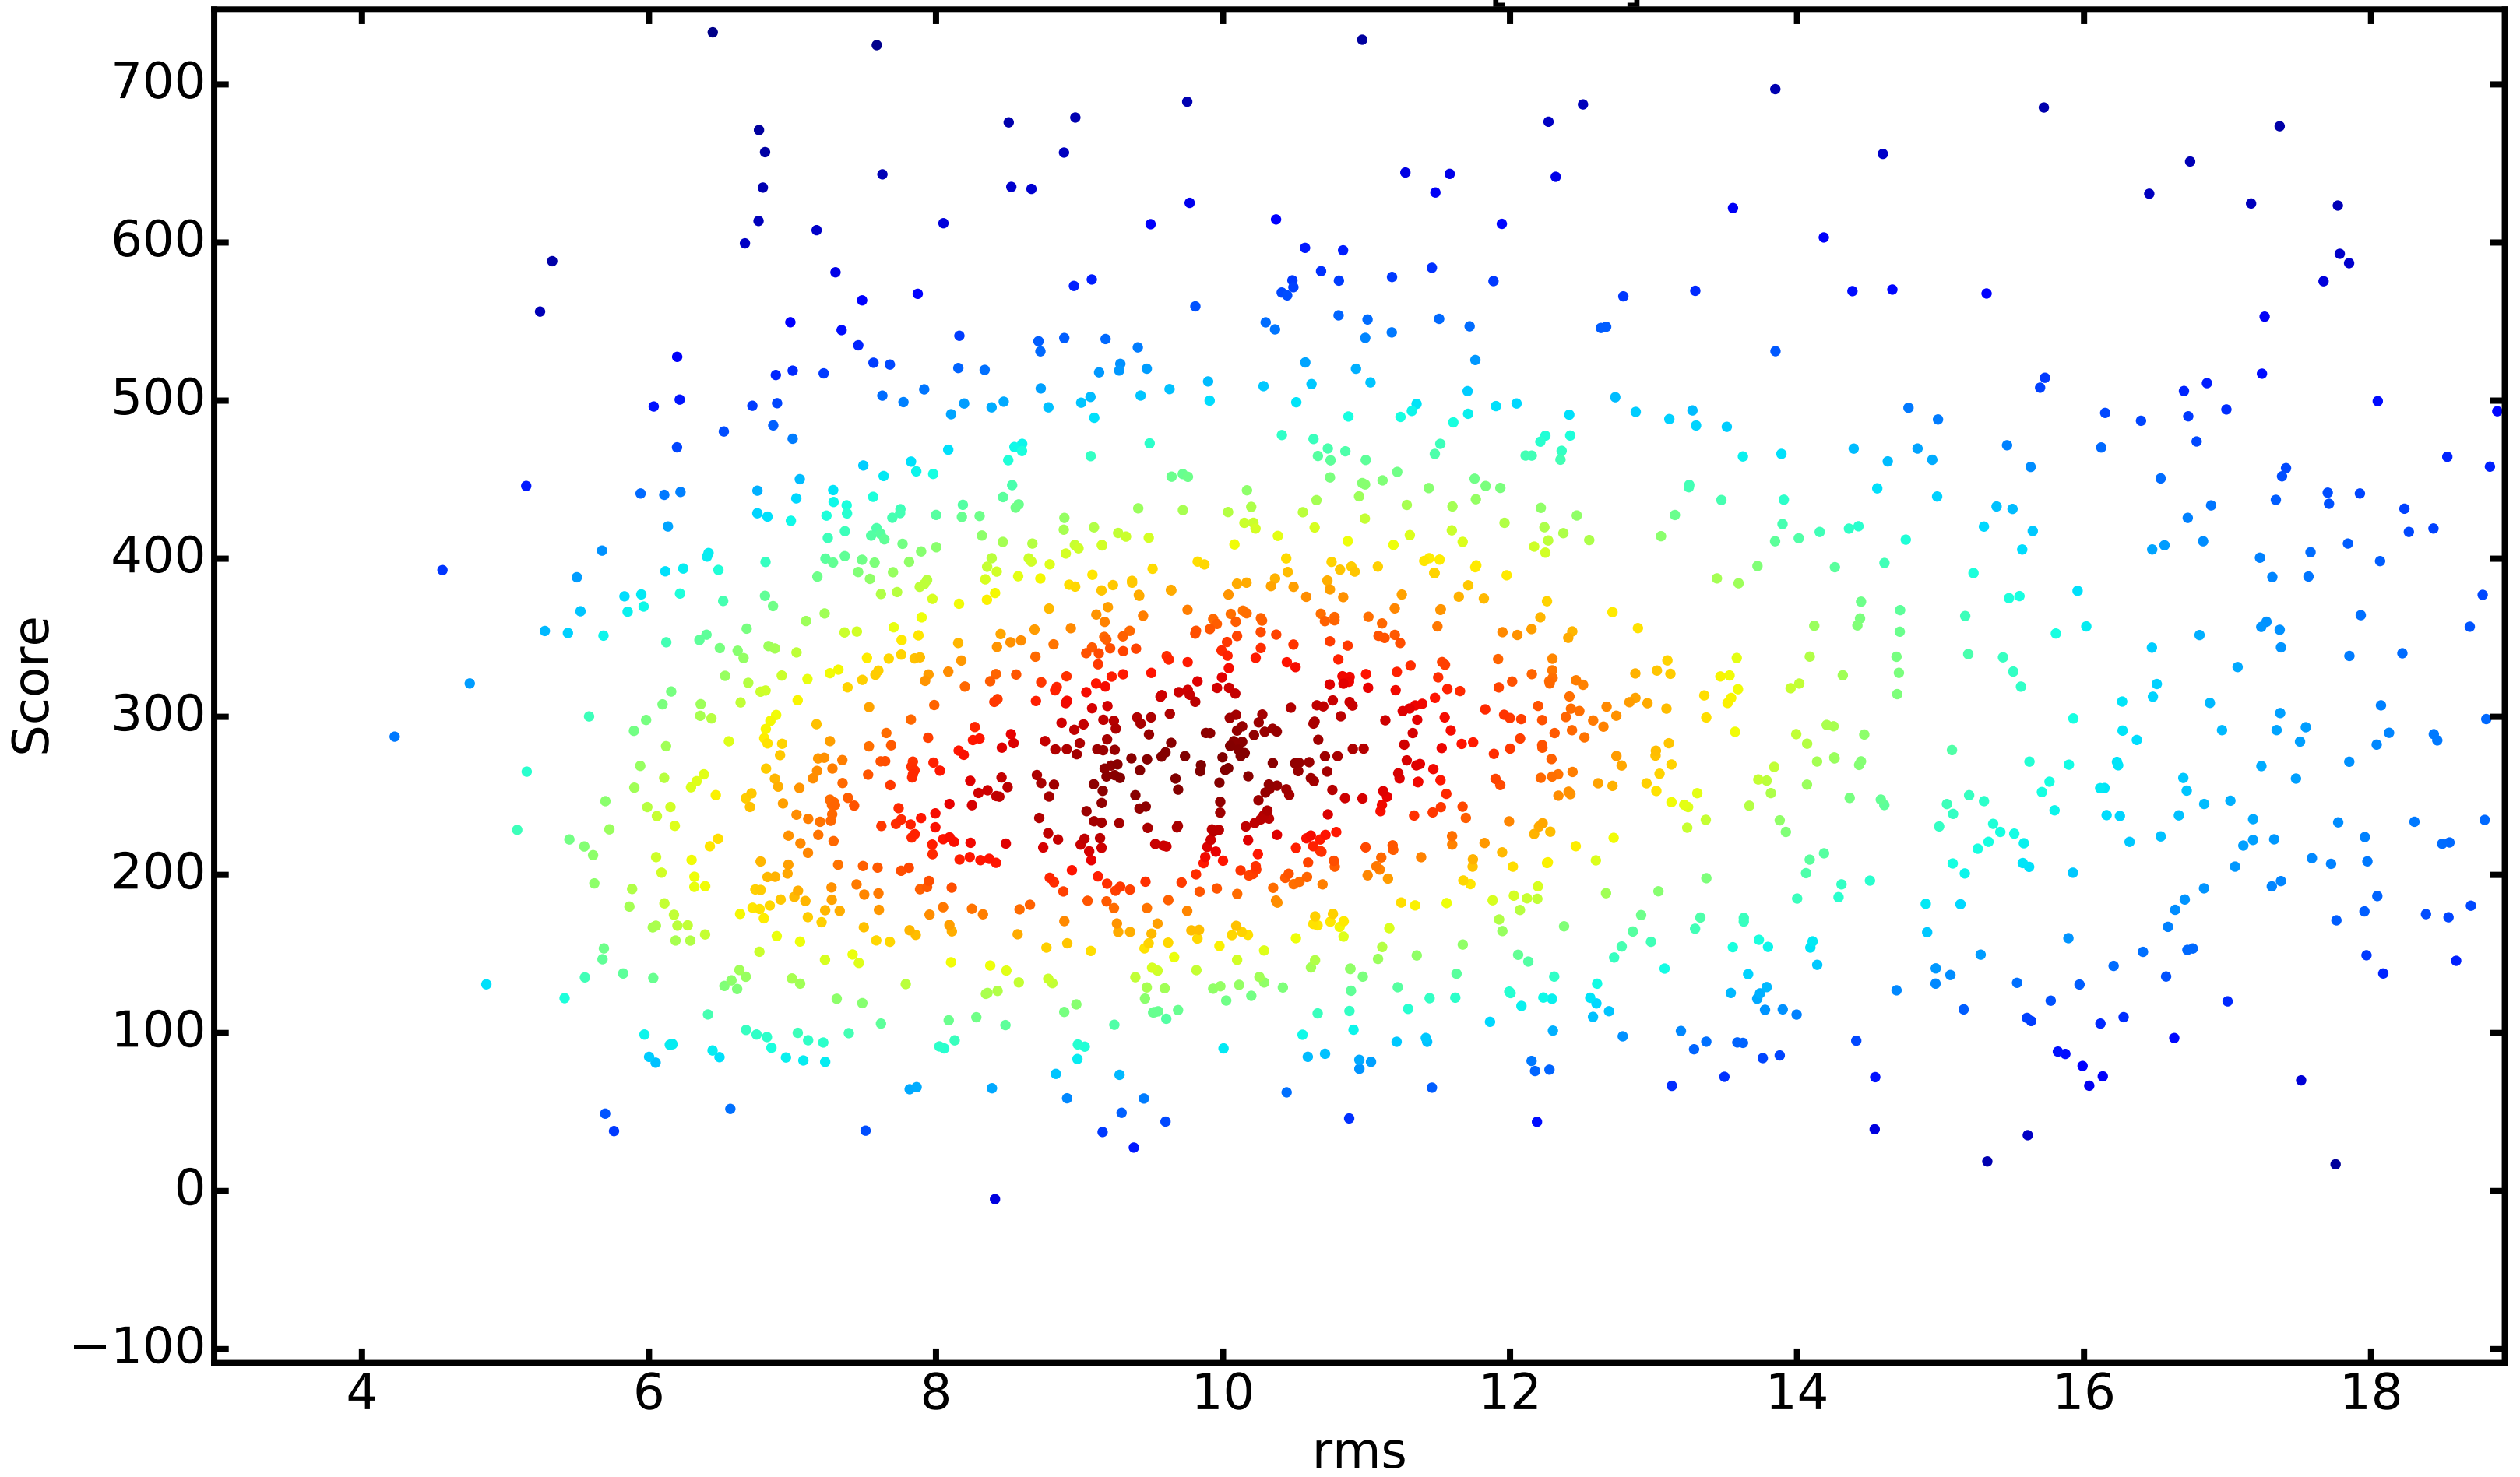

Score vs rms [151]

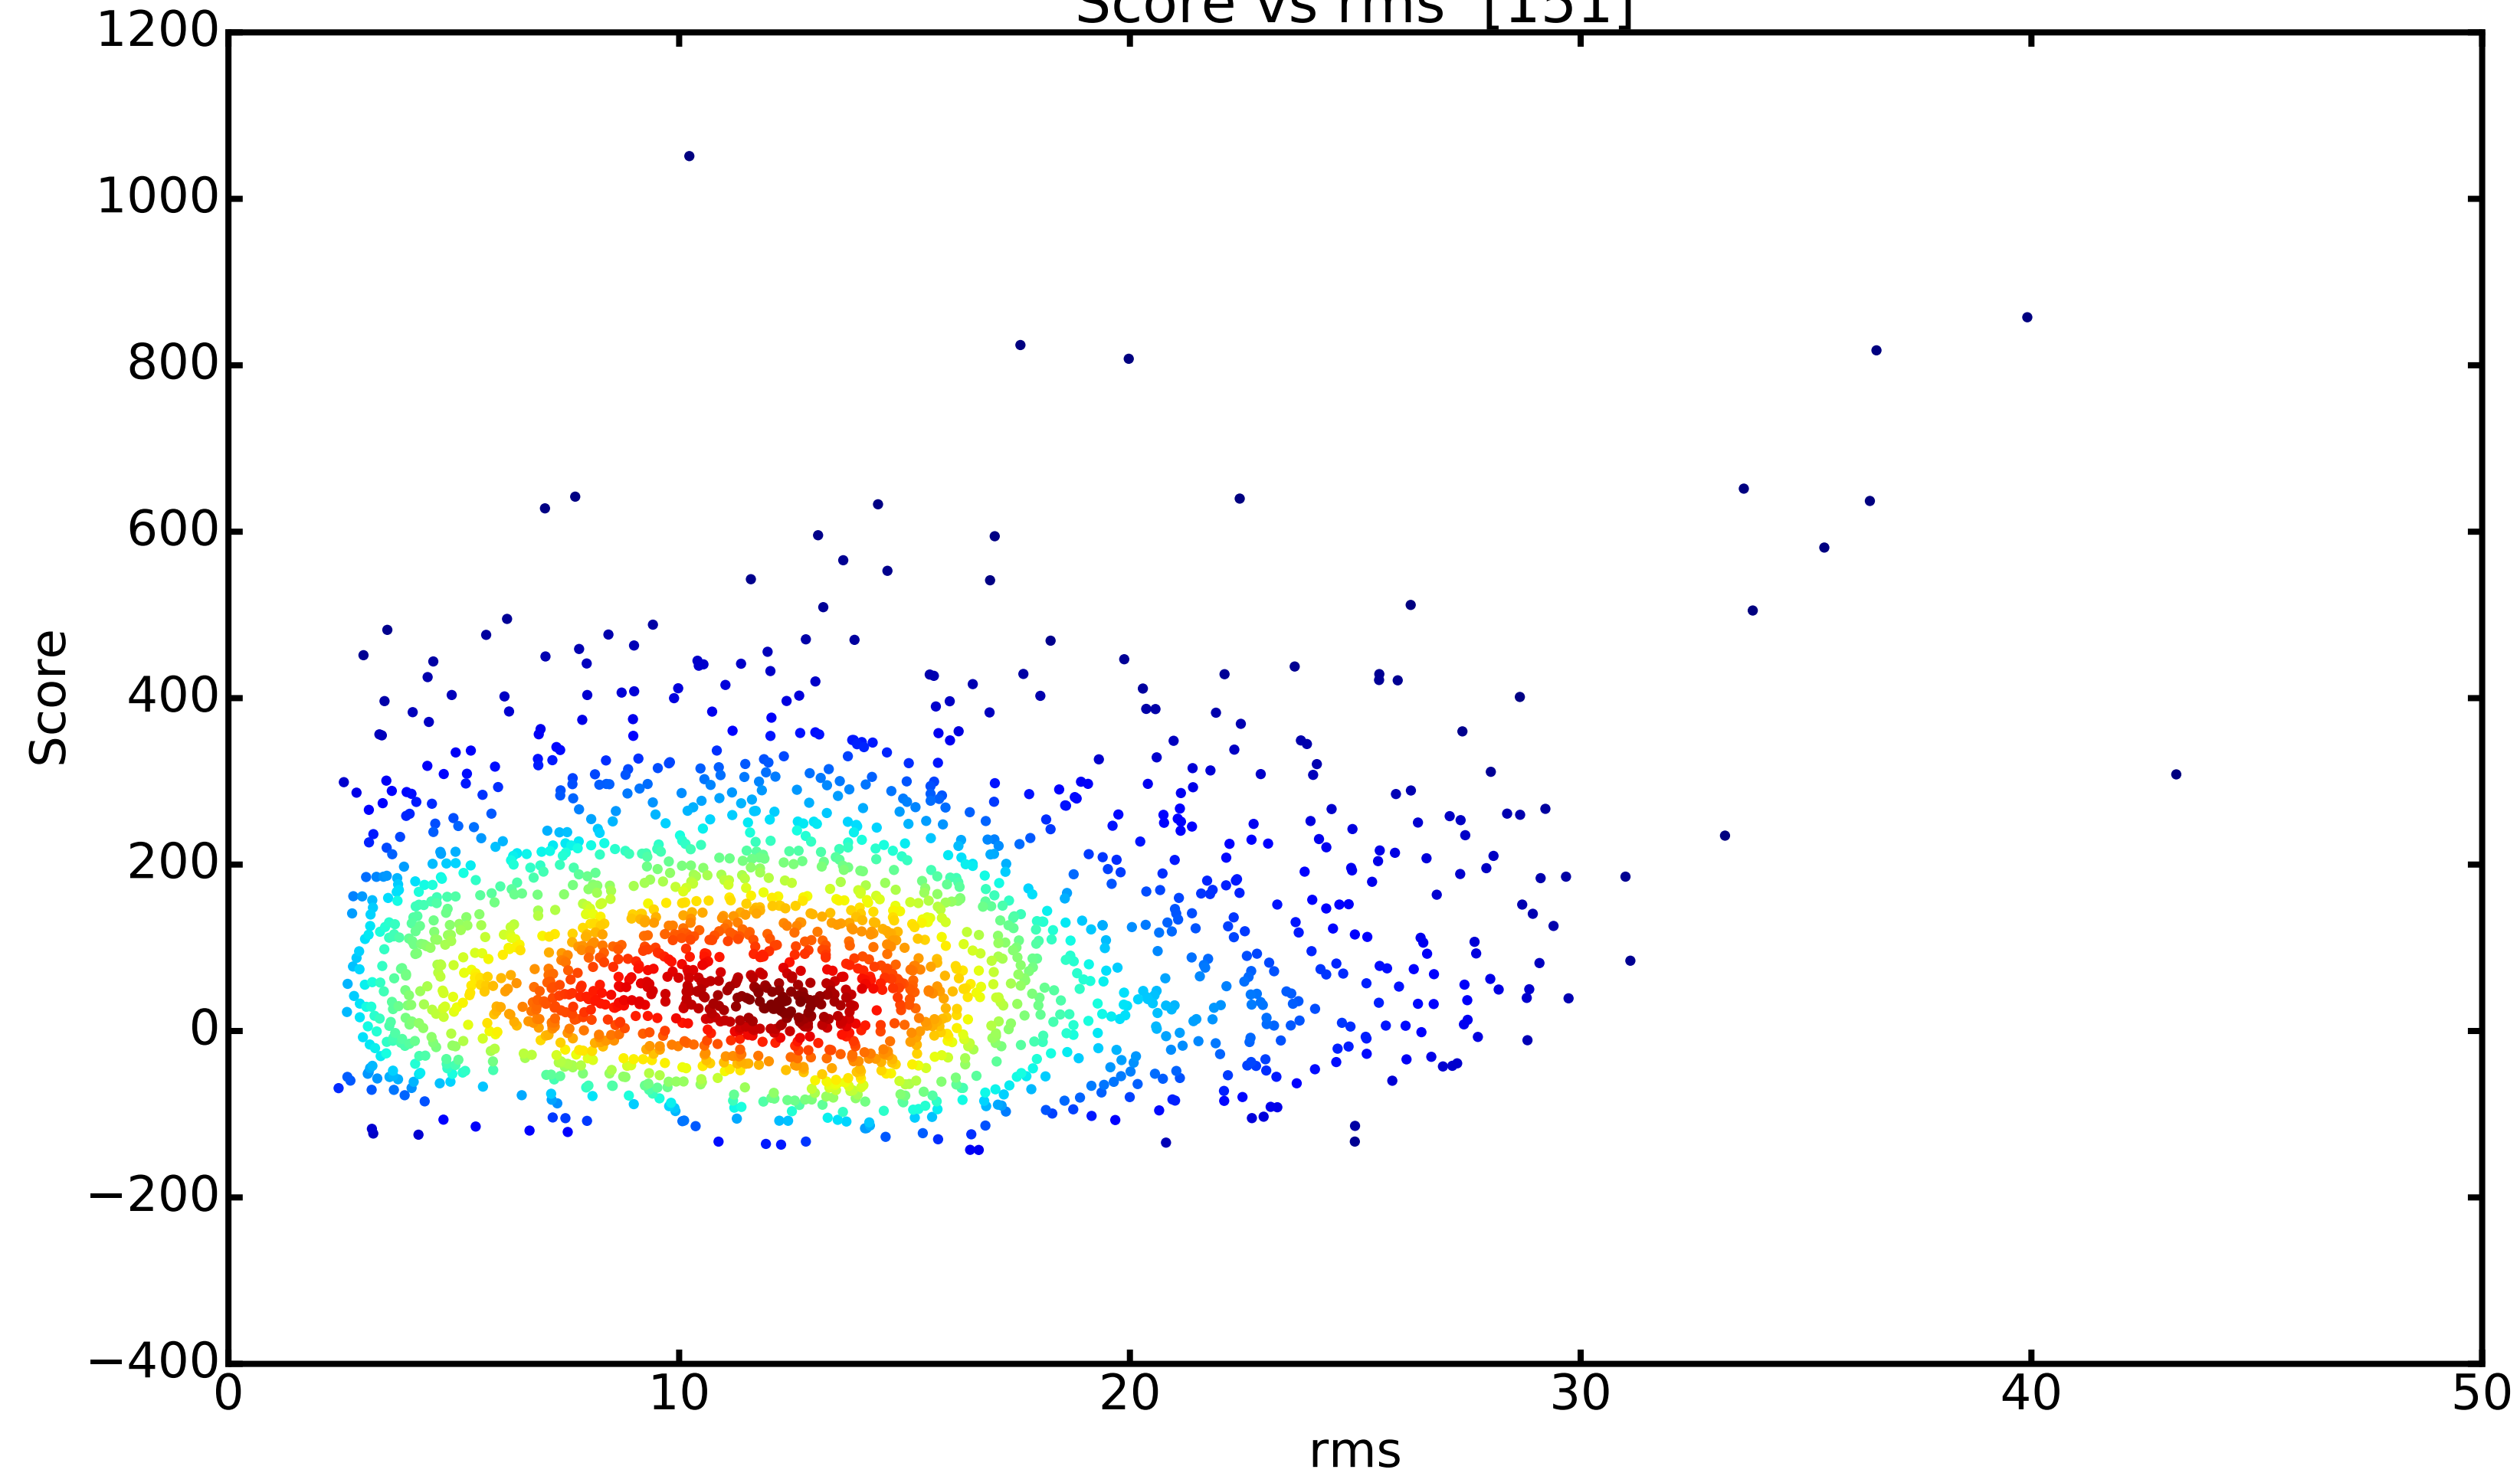

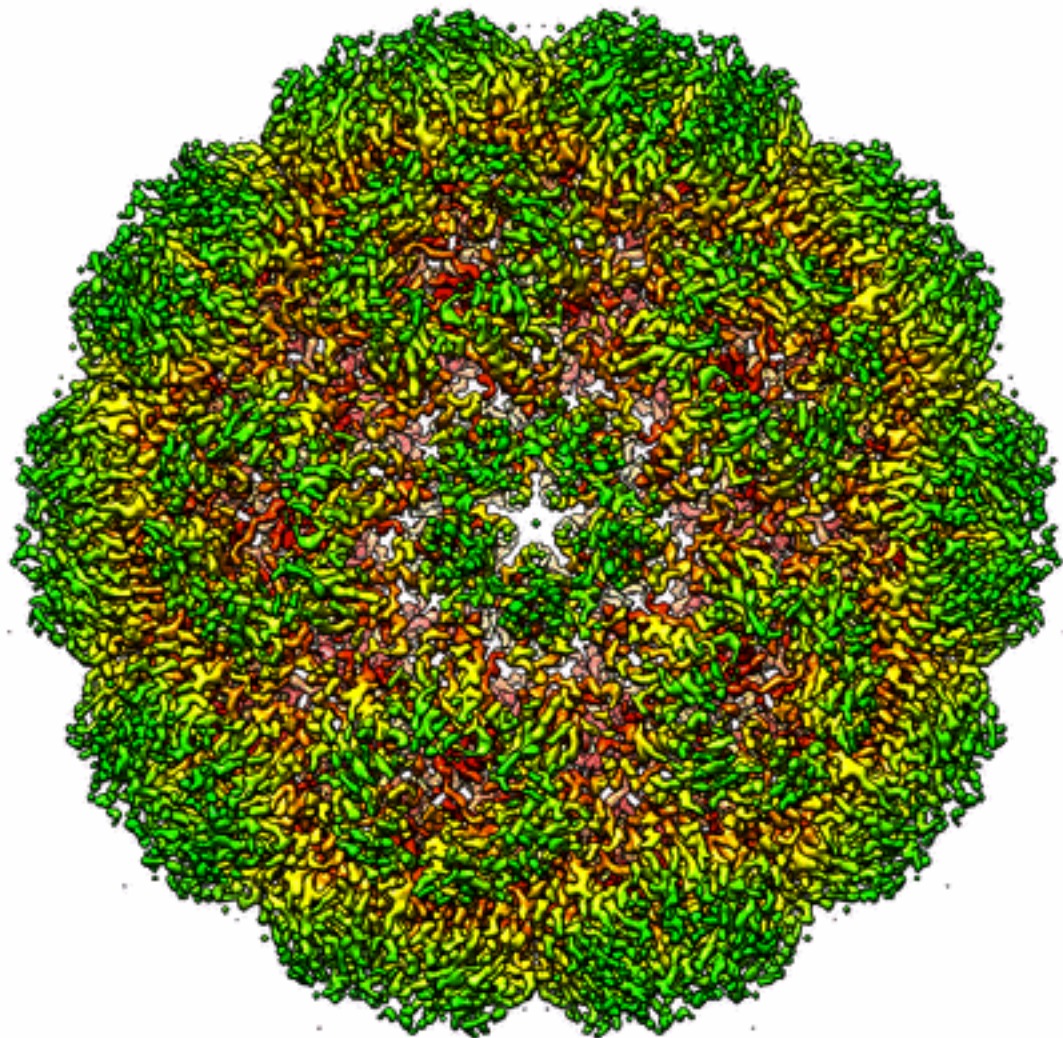

Score vs rms [102]

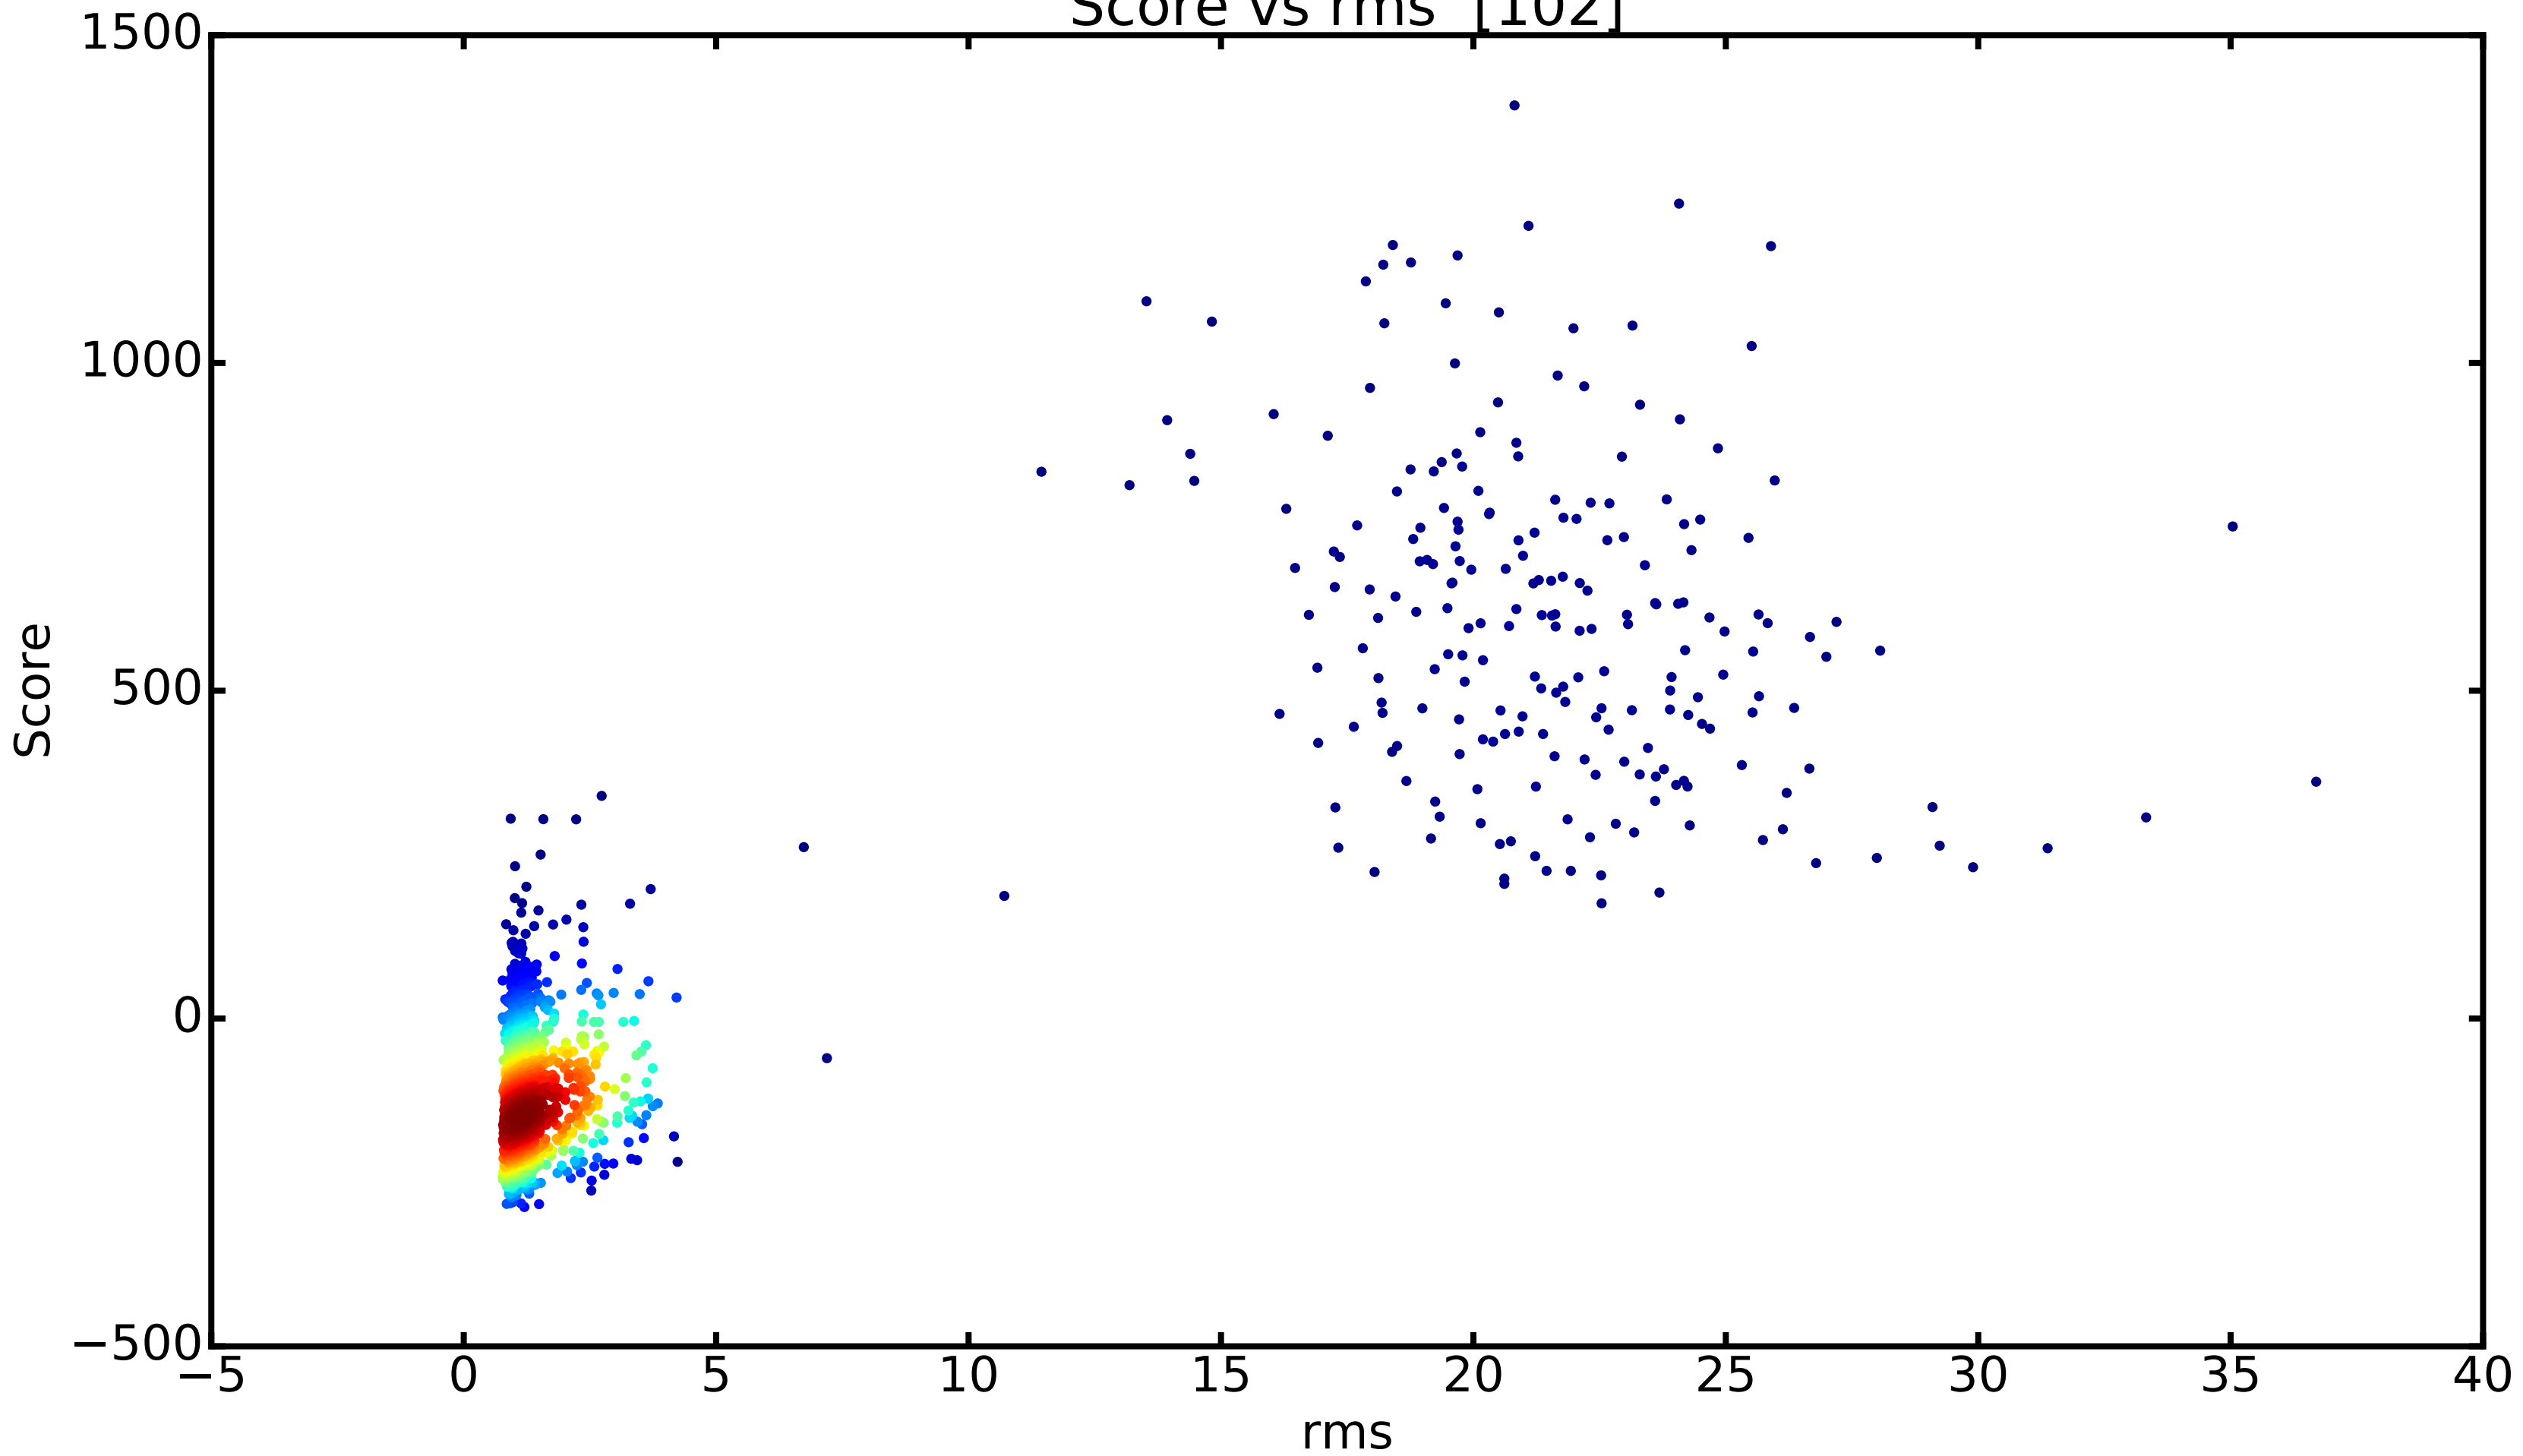

Score vs rms [102]

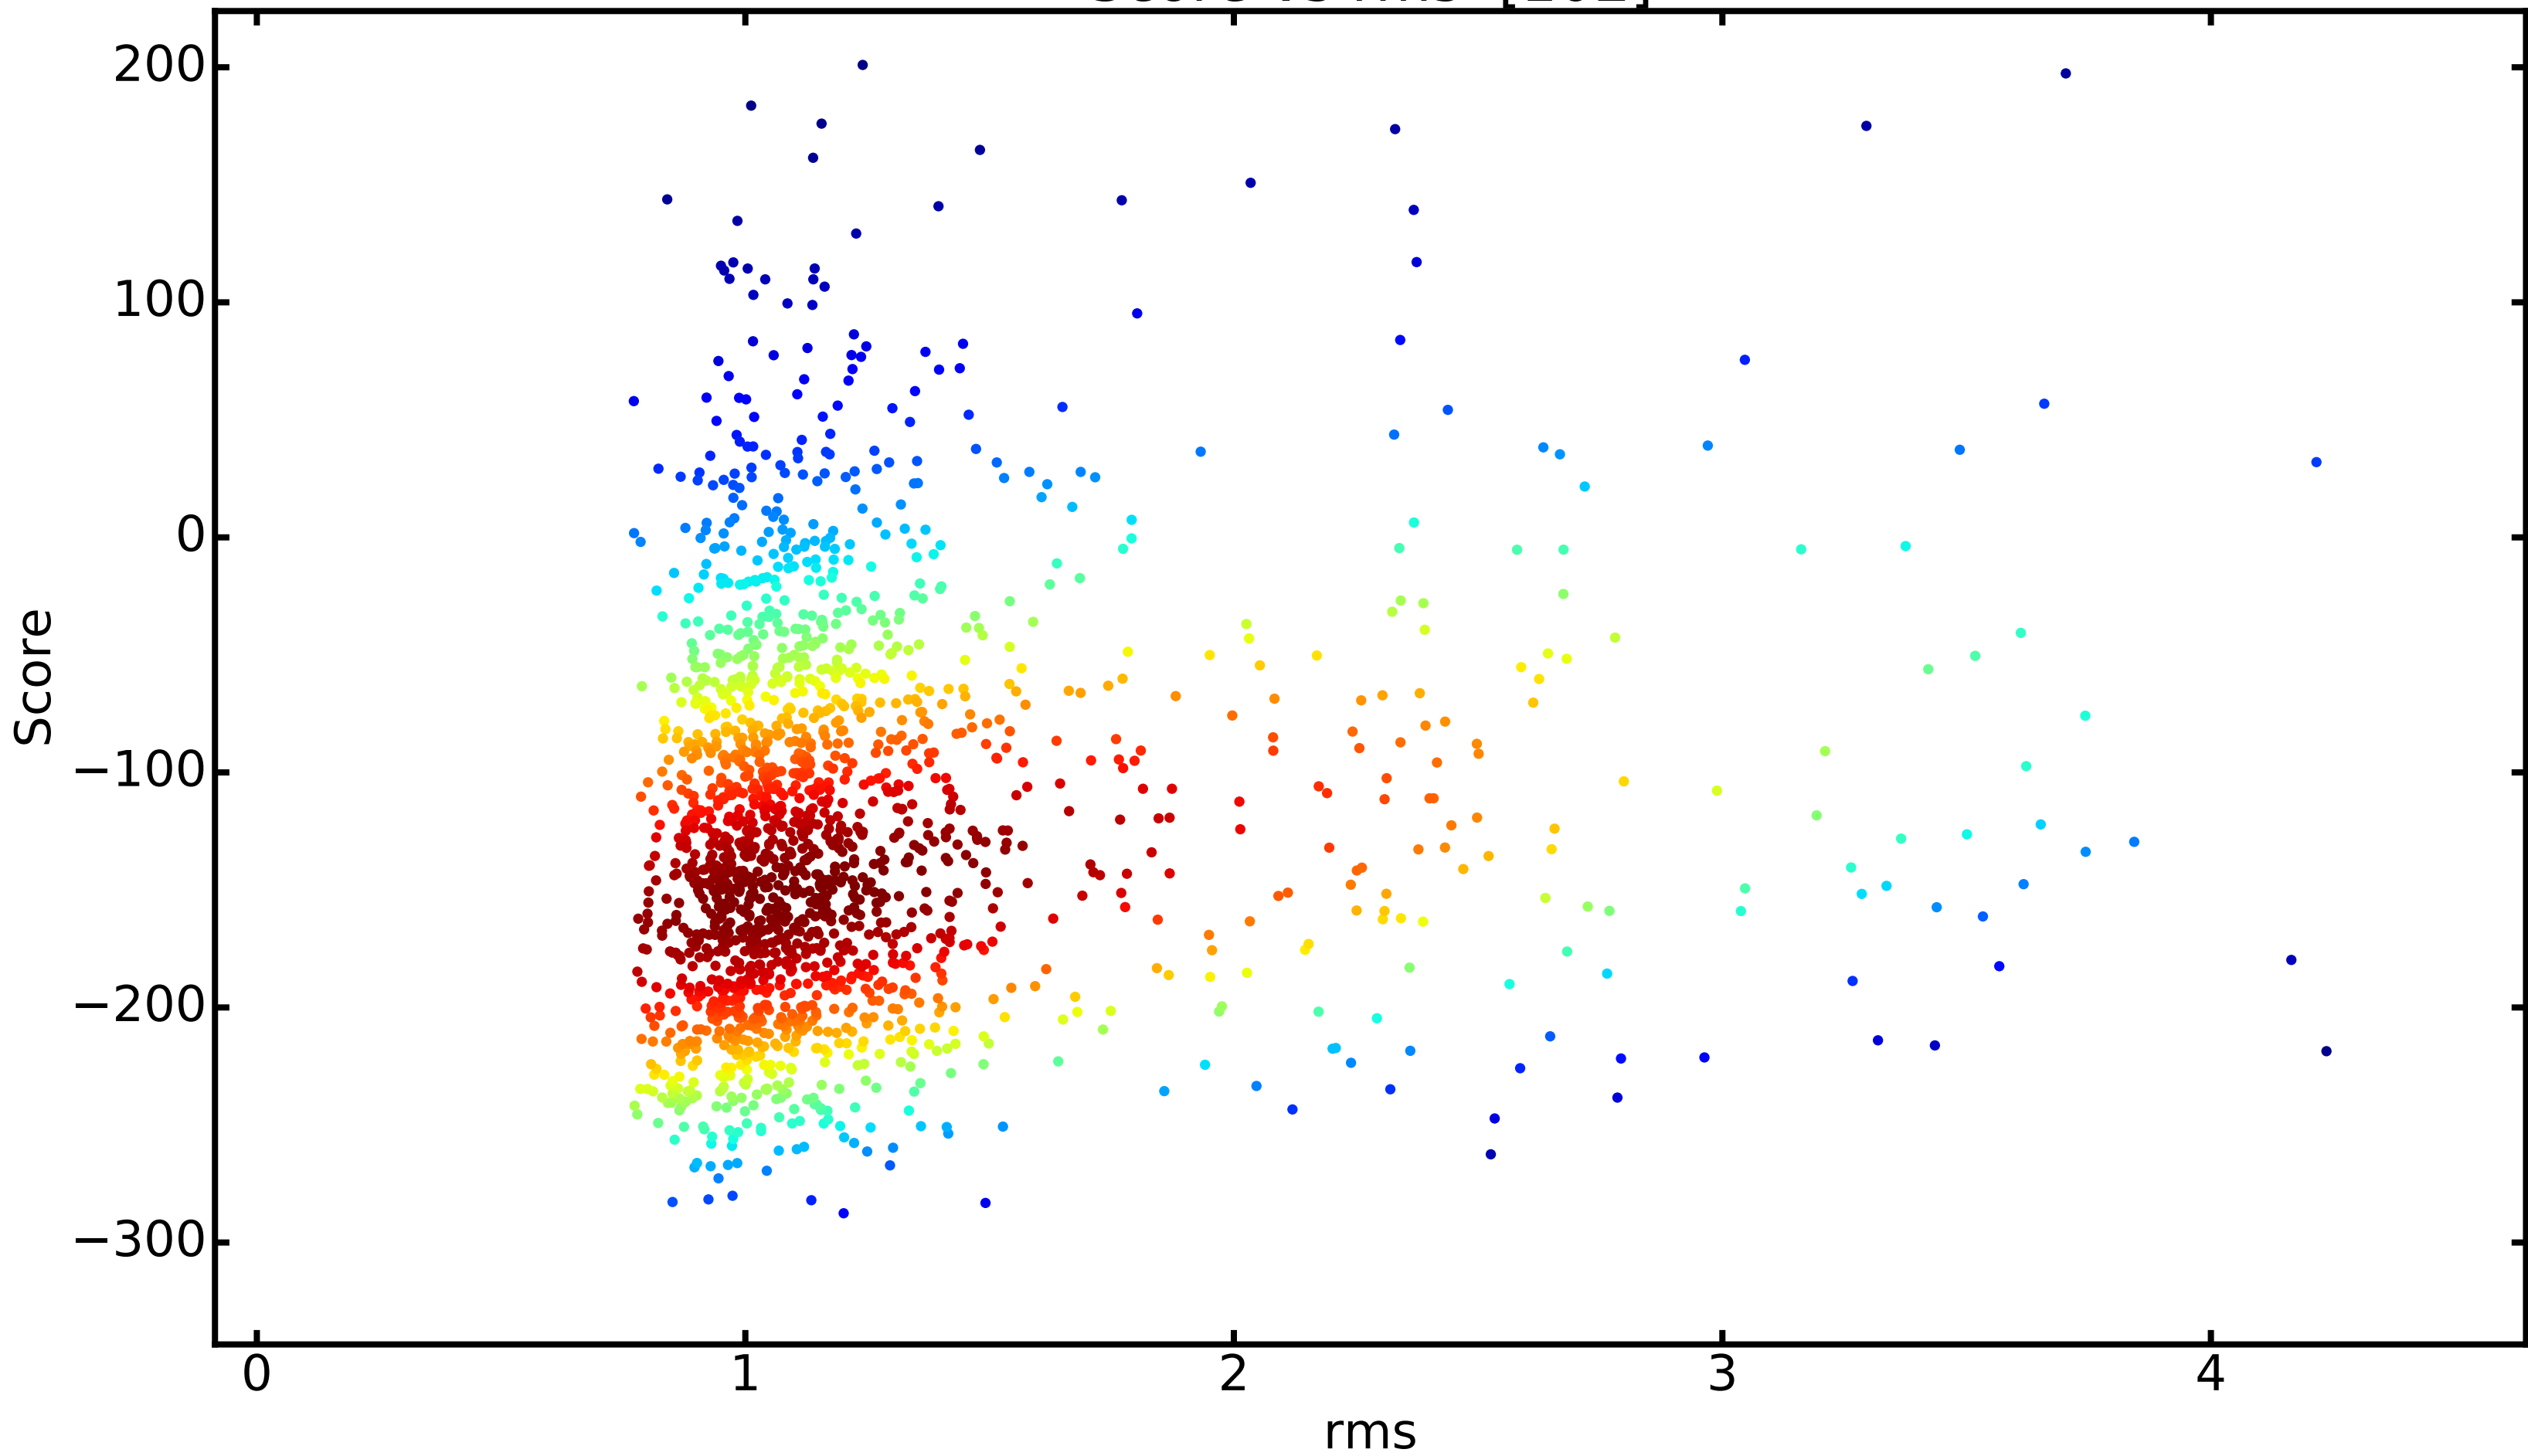

Score vs rms [110]

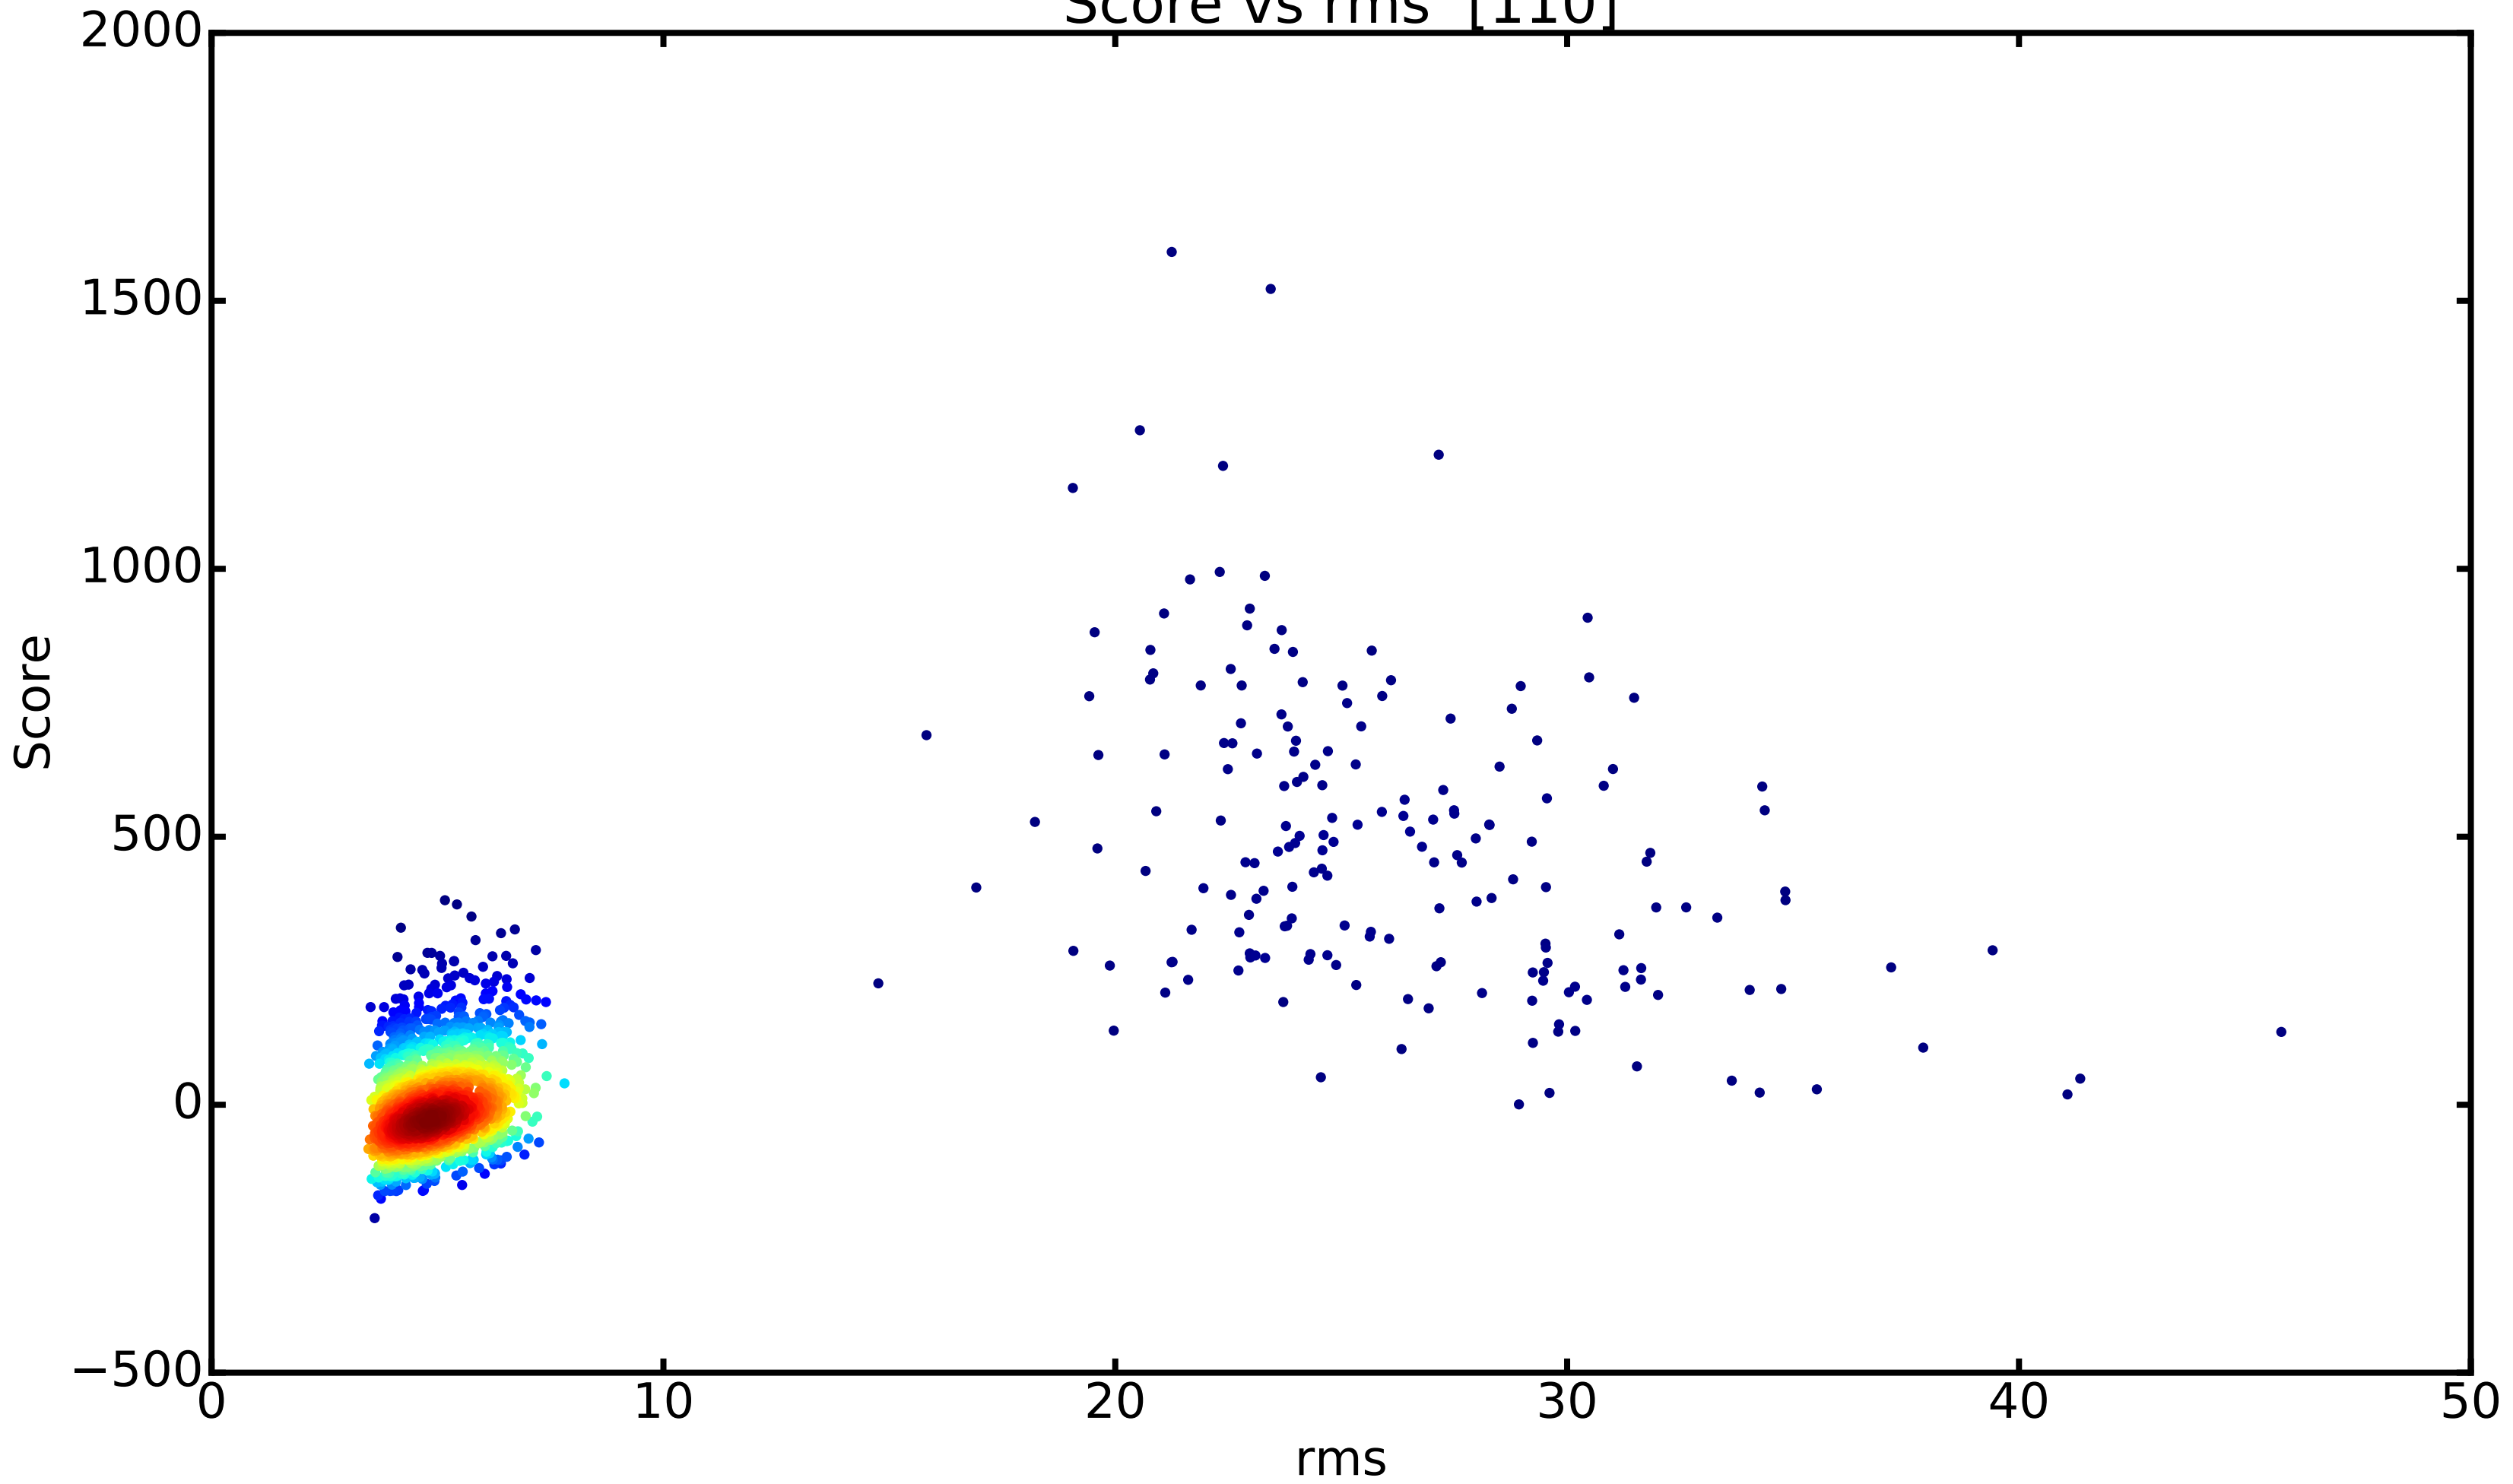

Score vs rms [110]

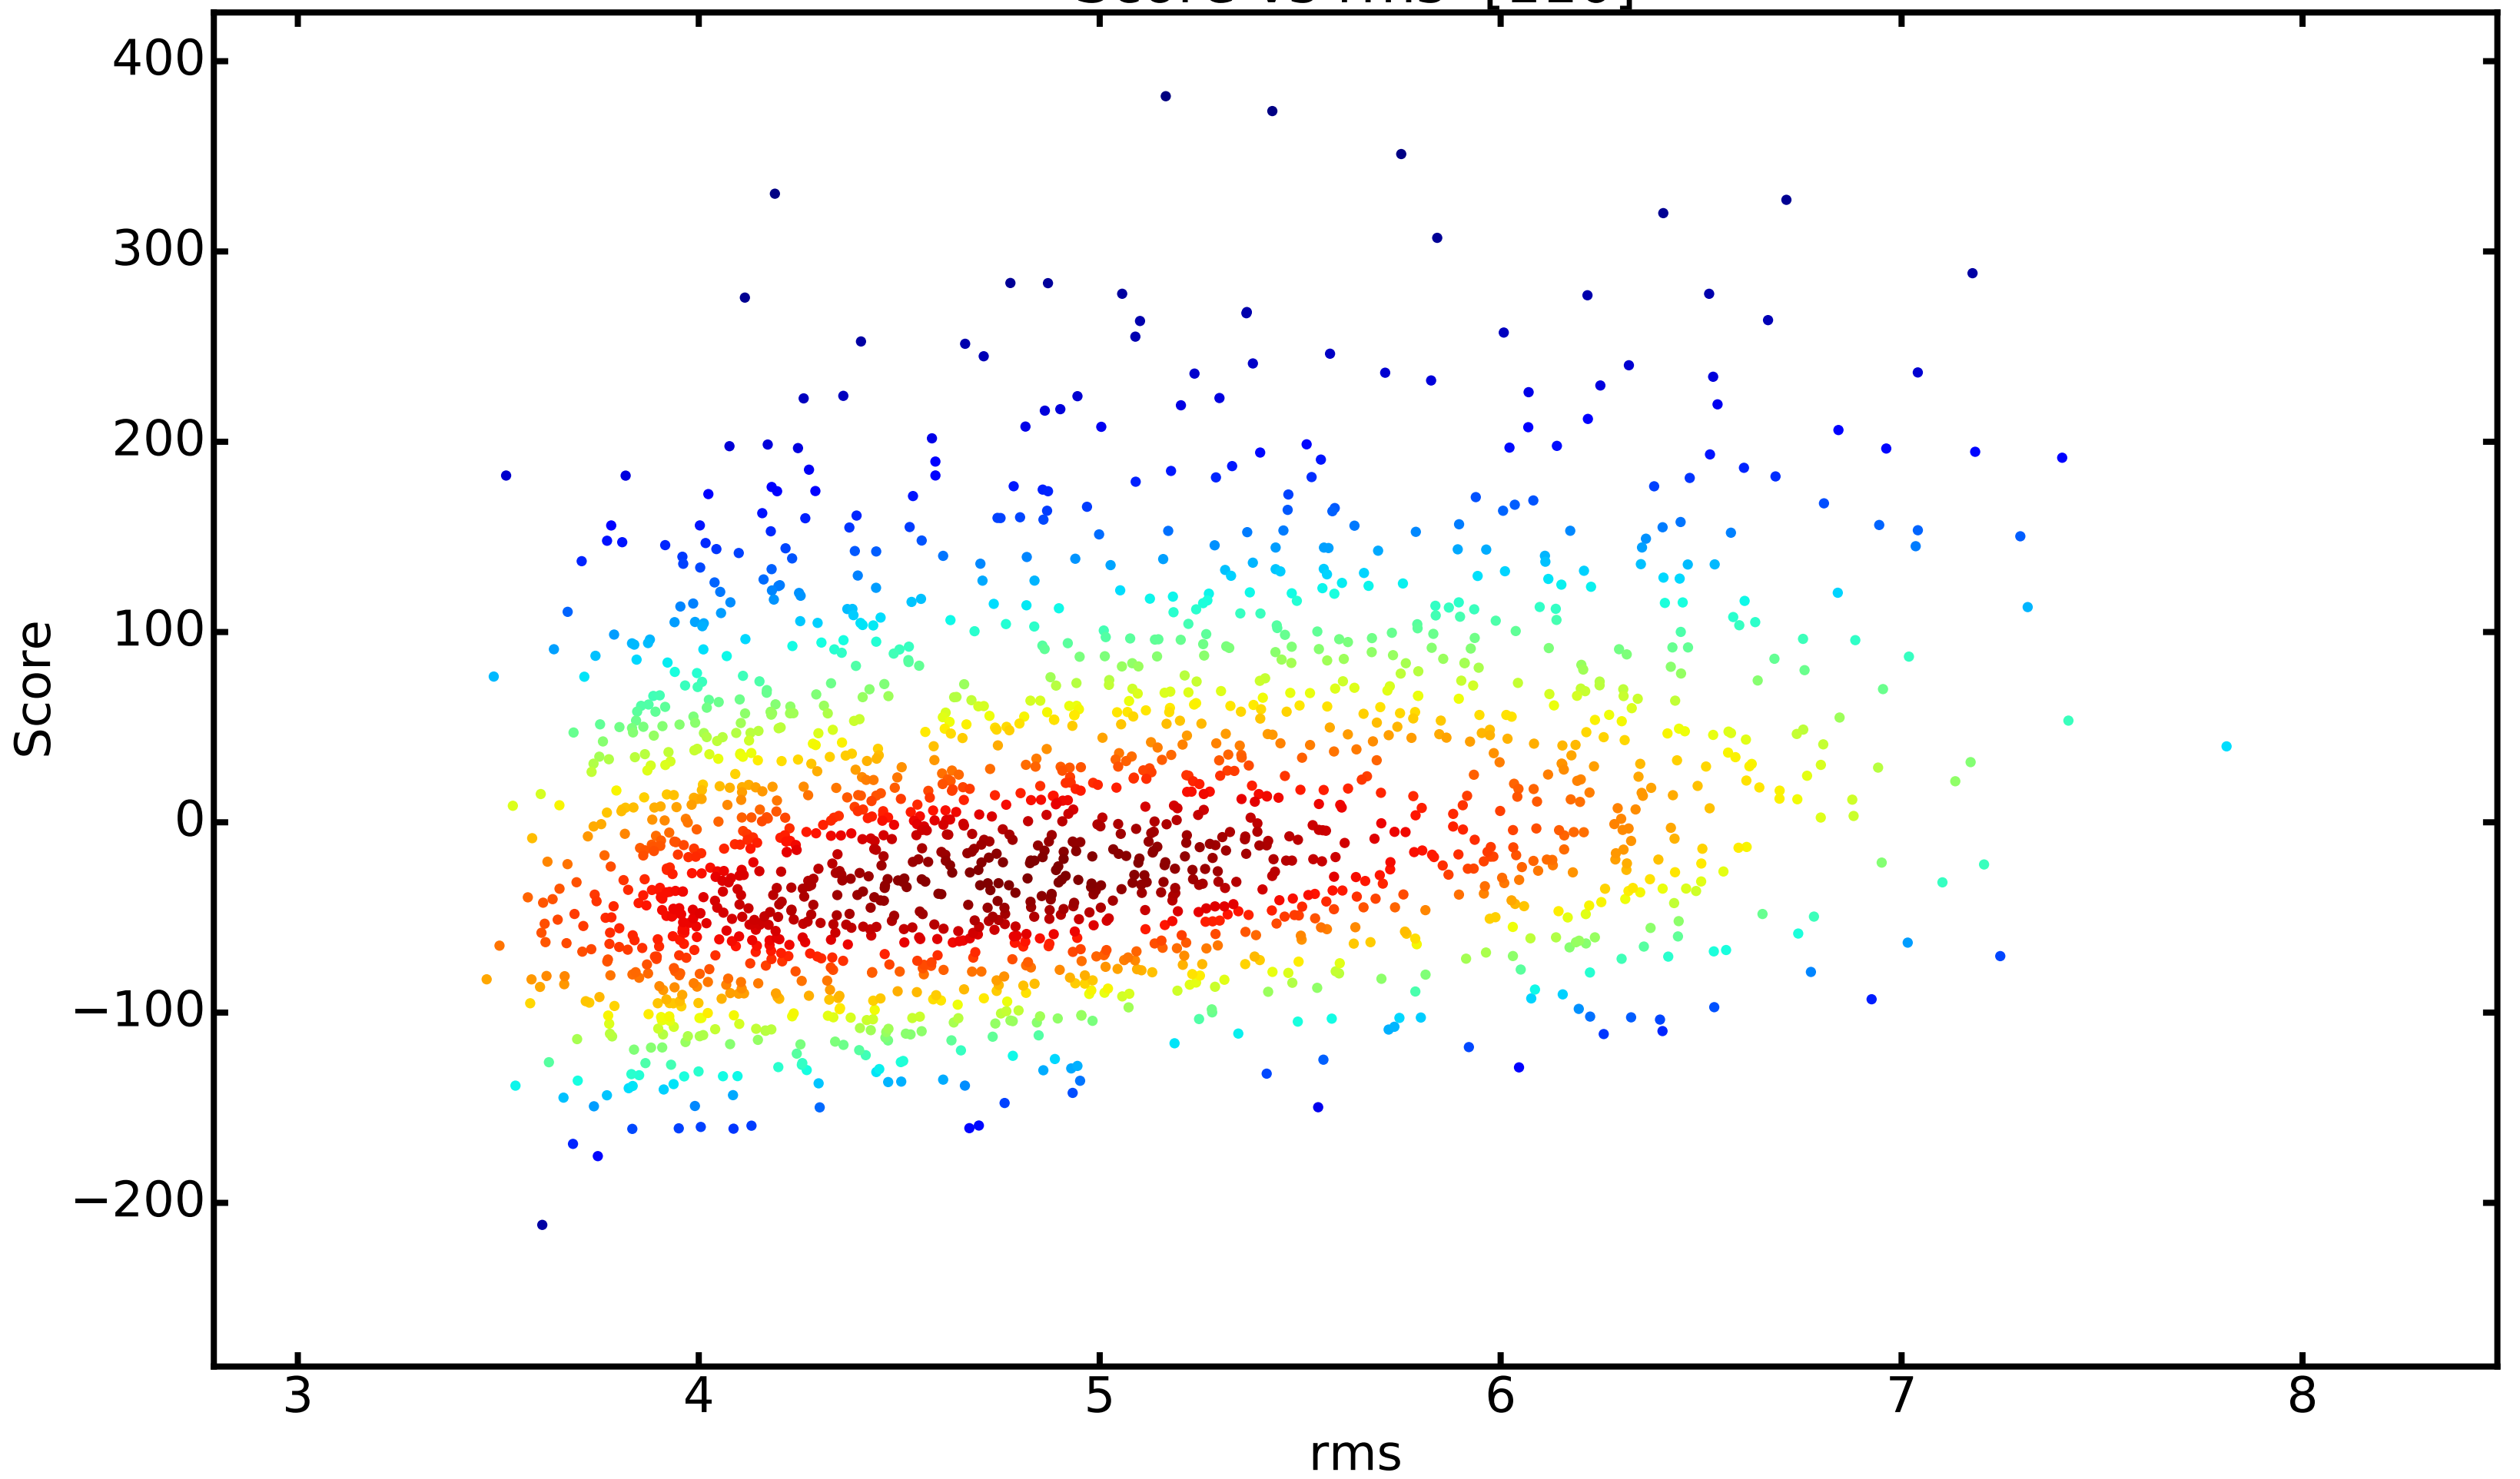

Score vs rms [136]

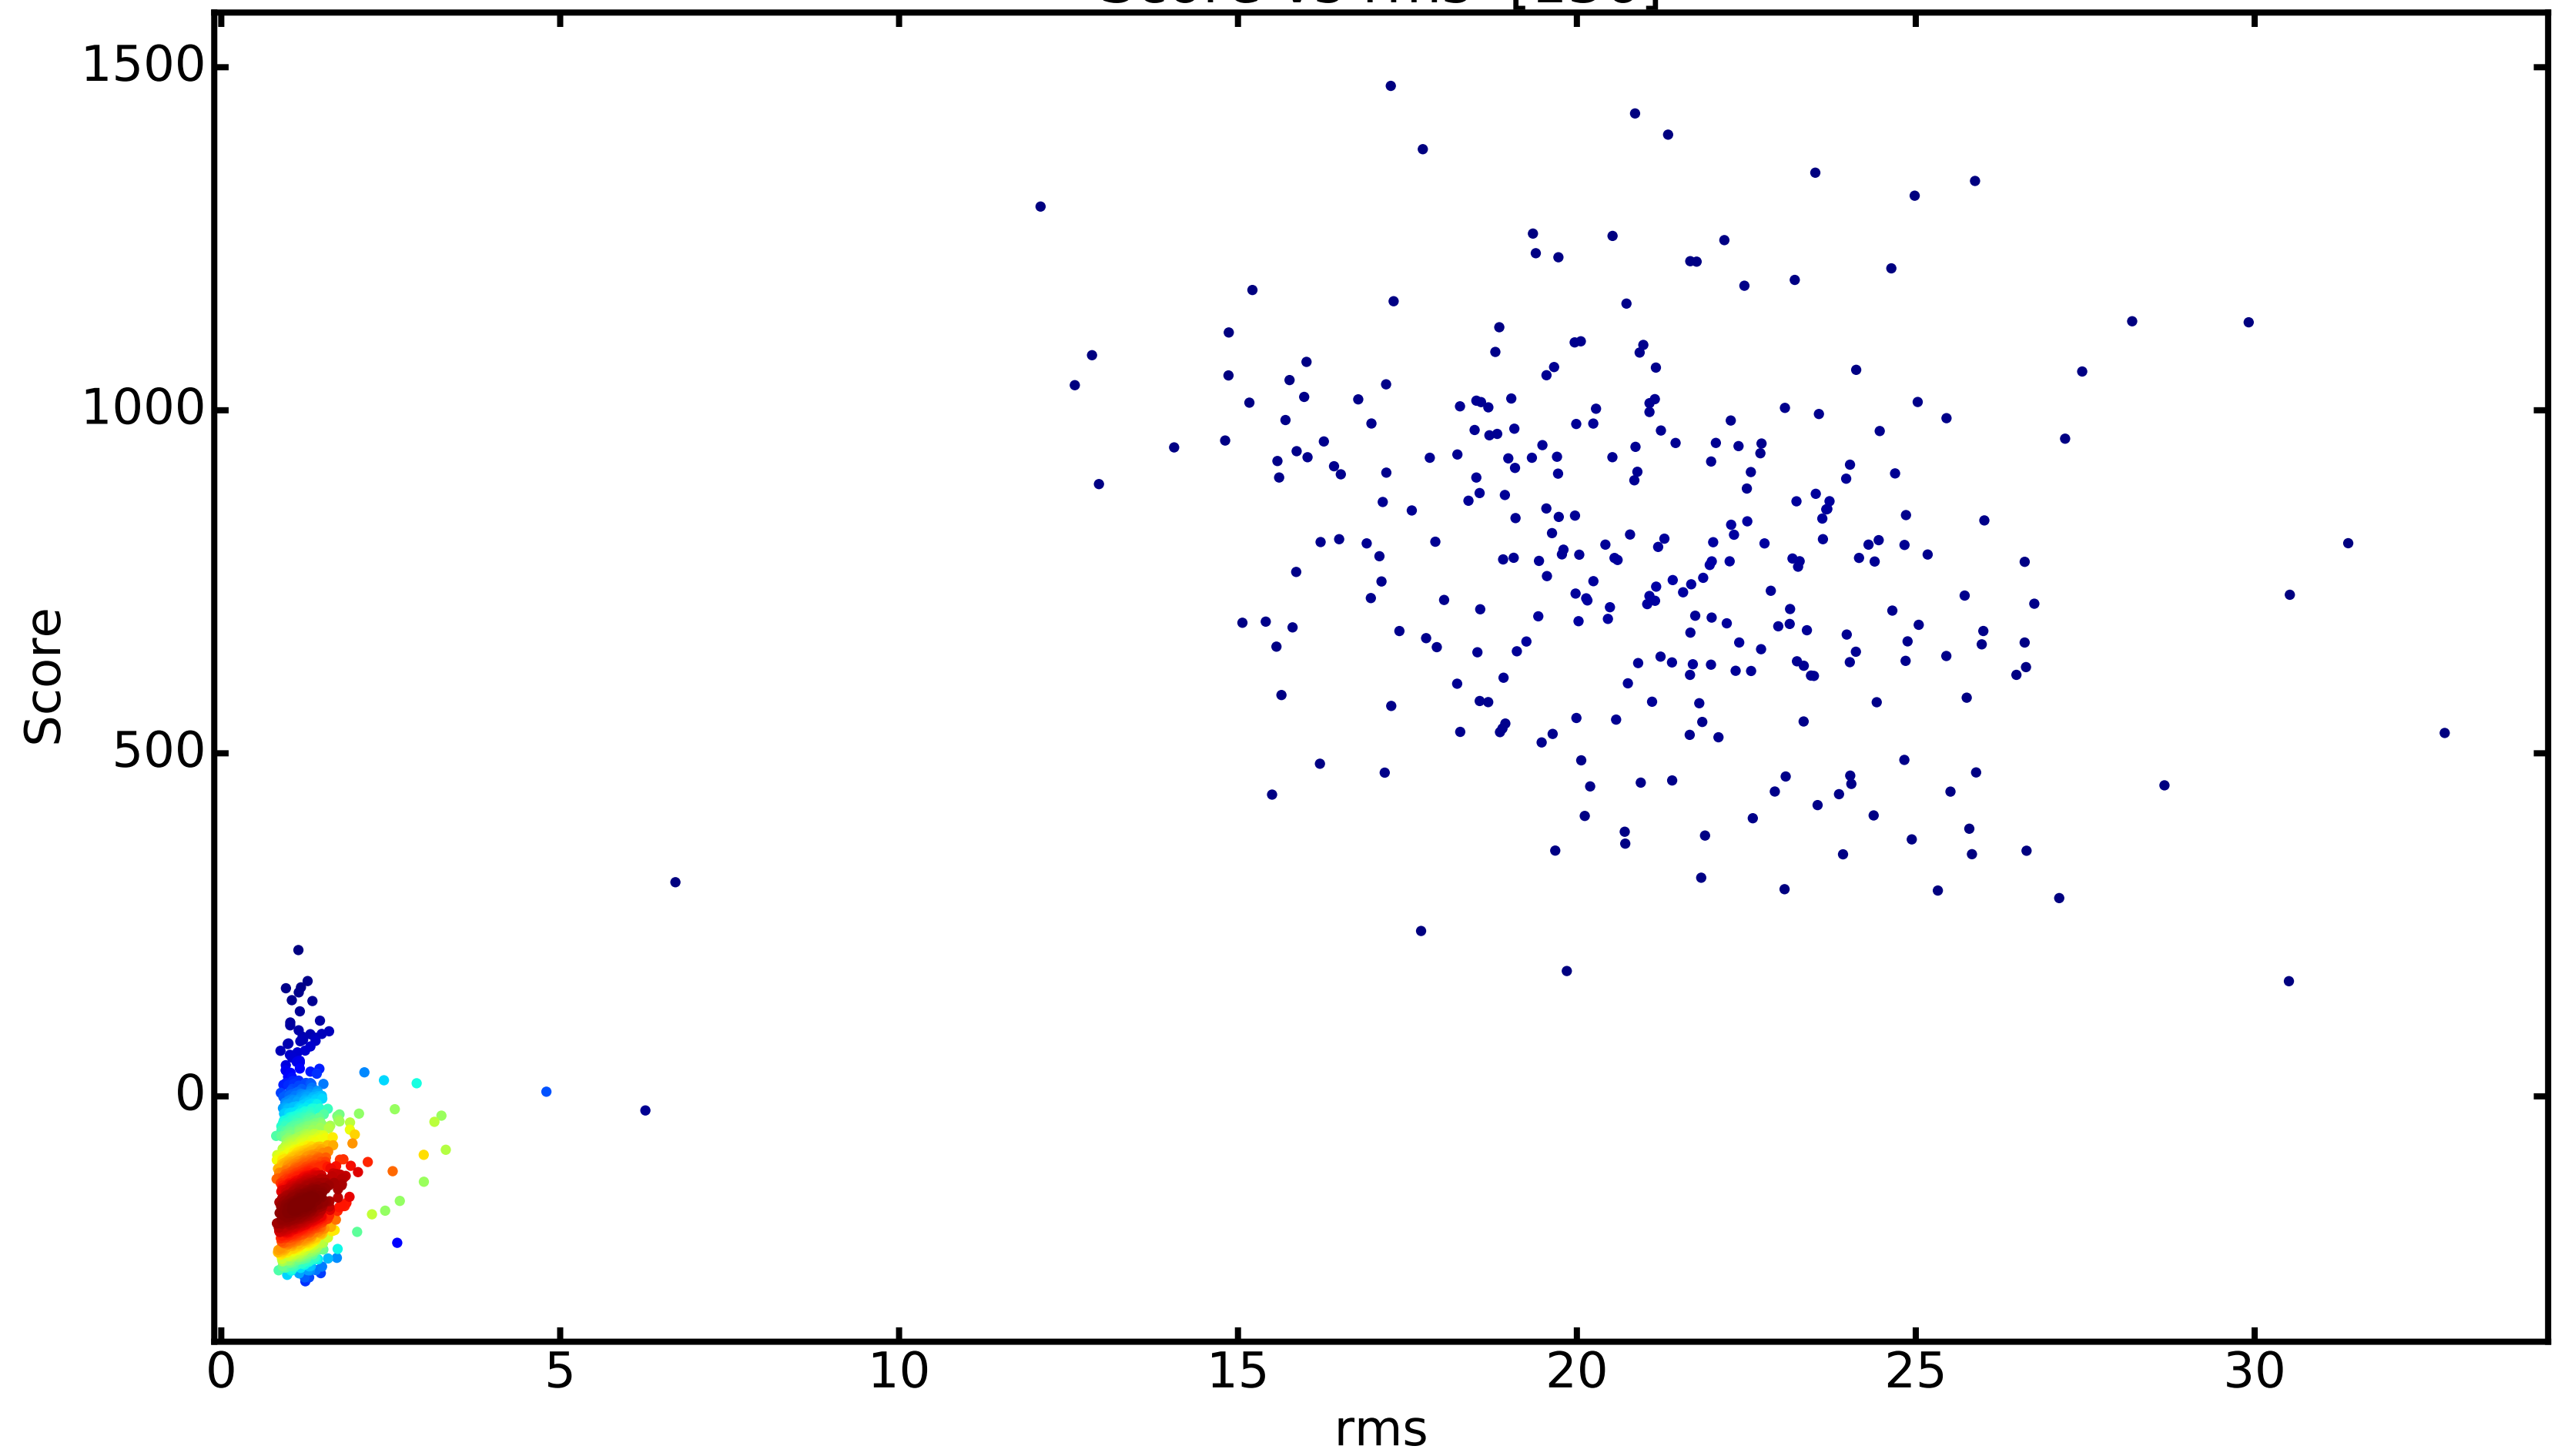



Score vs rms [136]

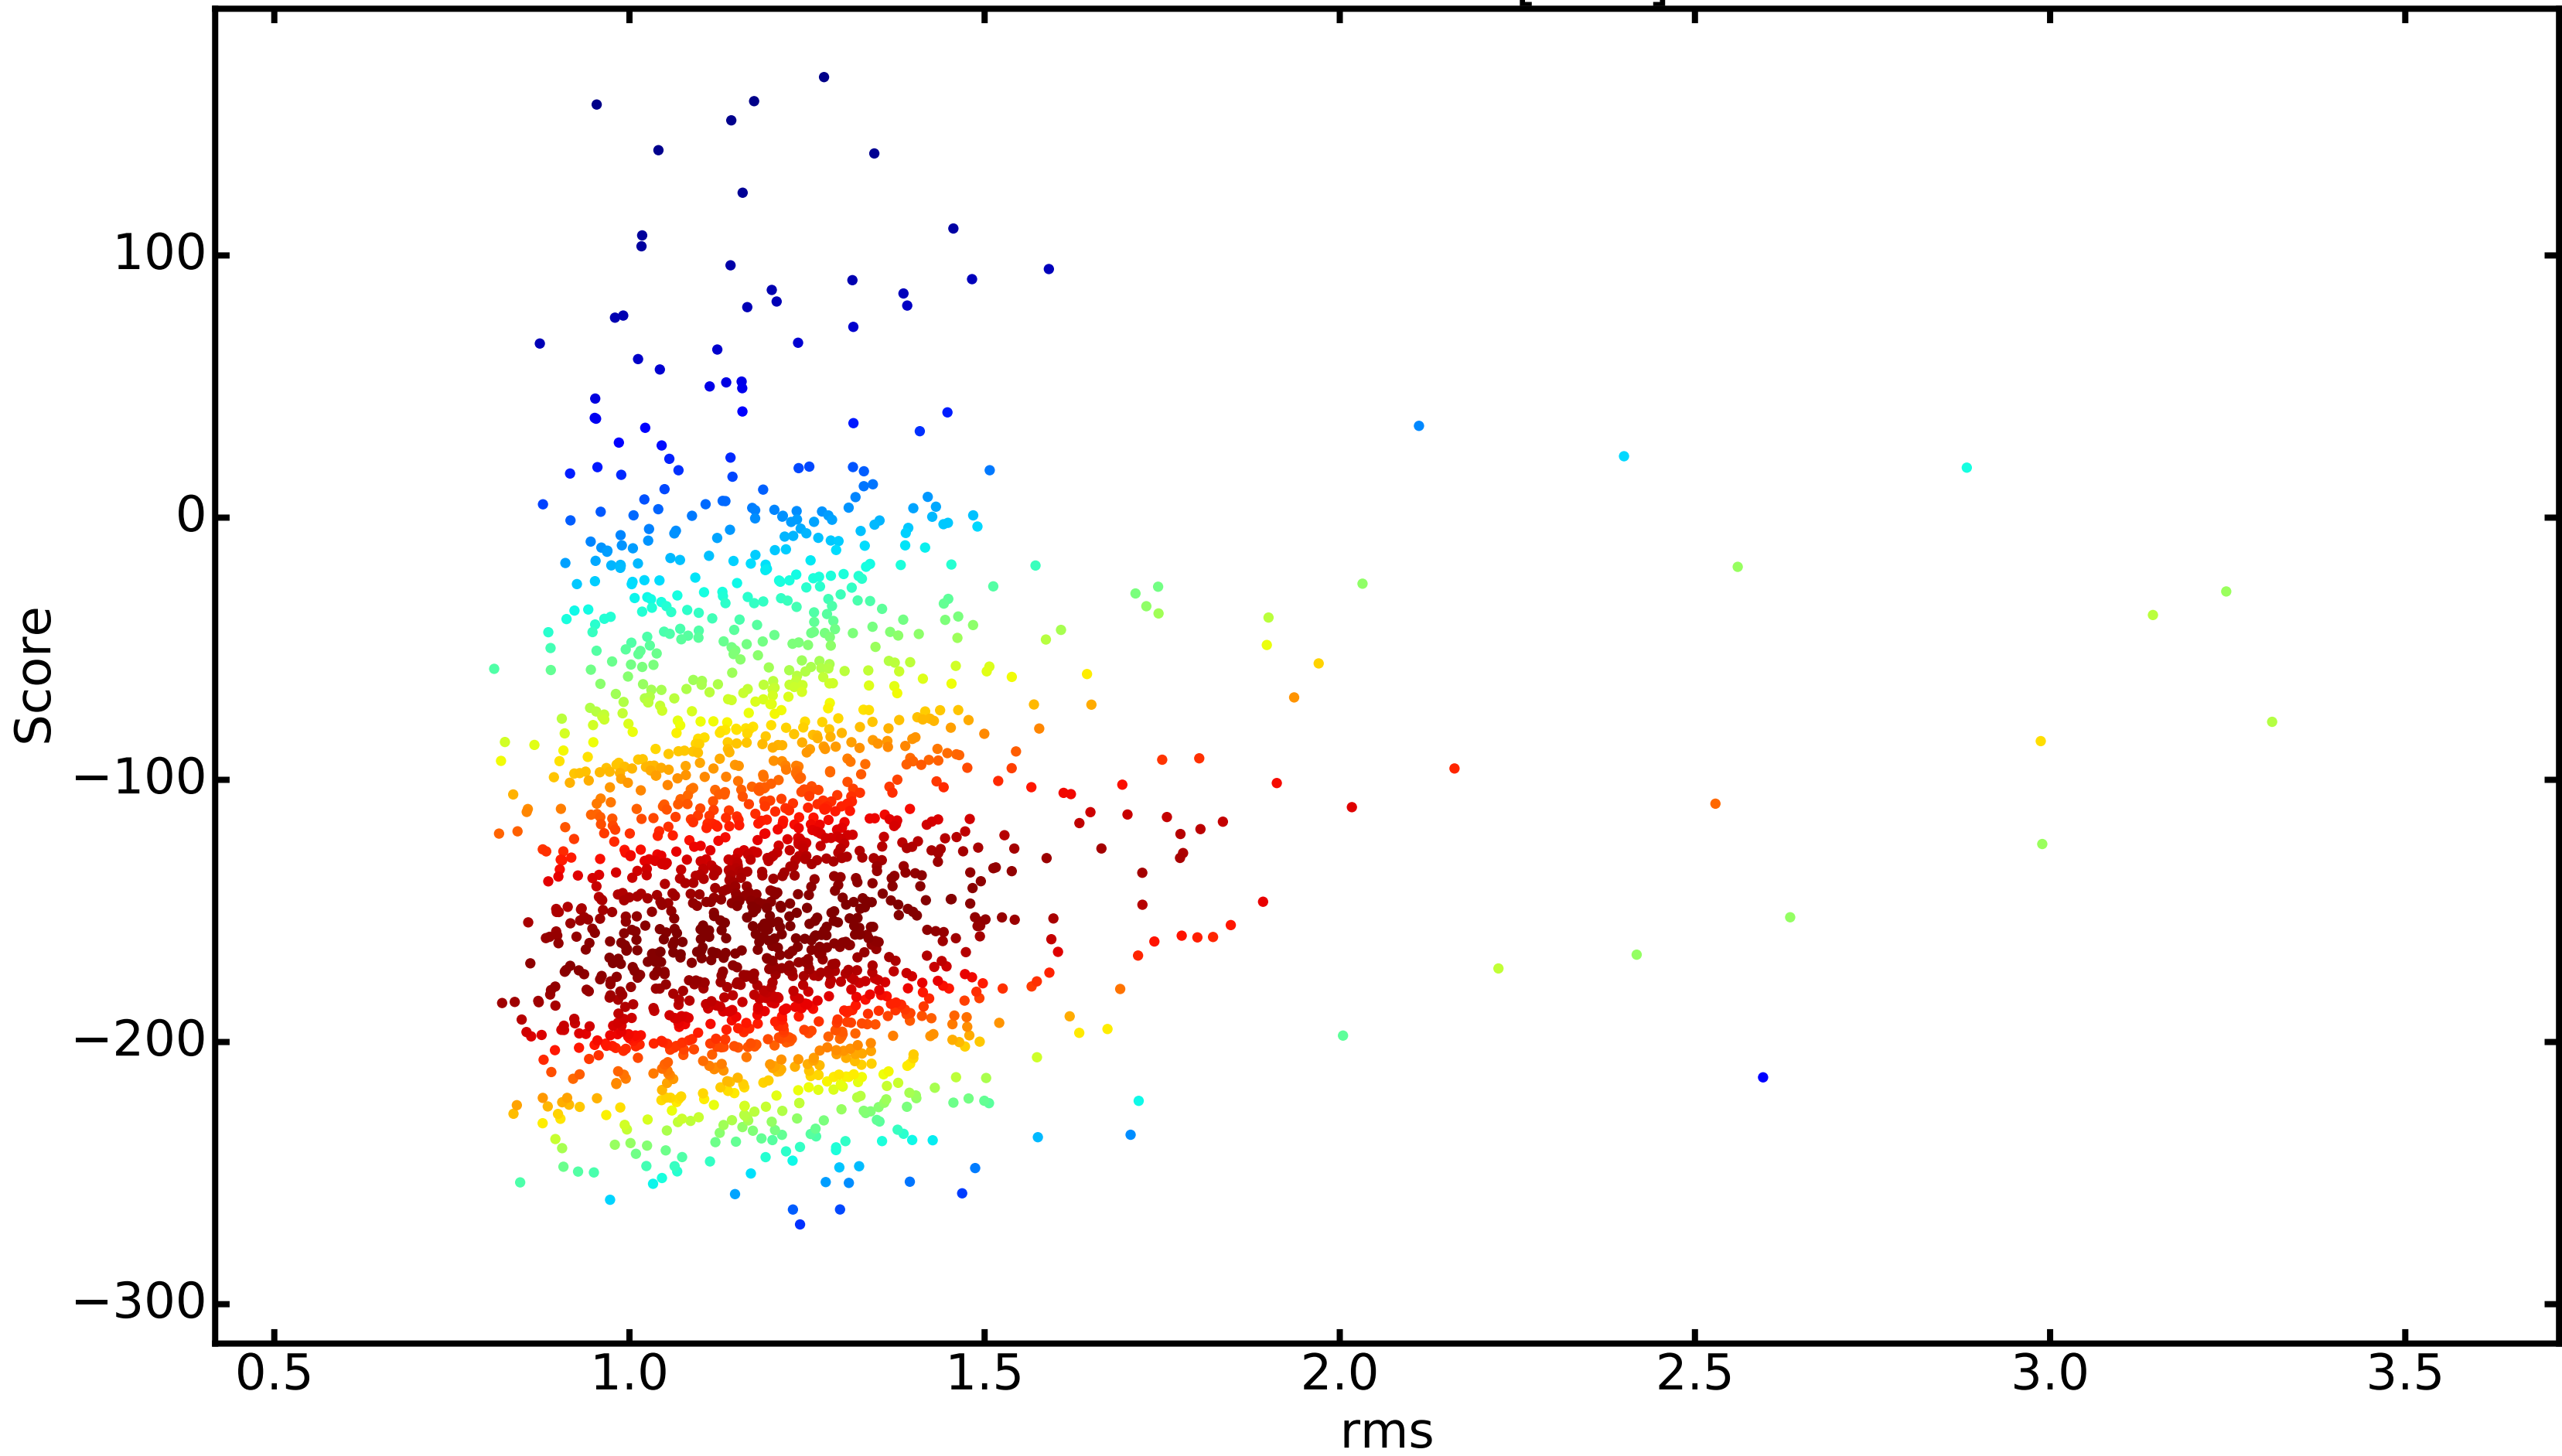

Score vs rms [137]

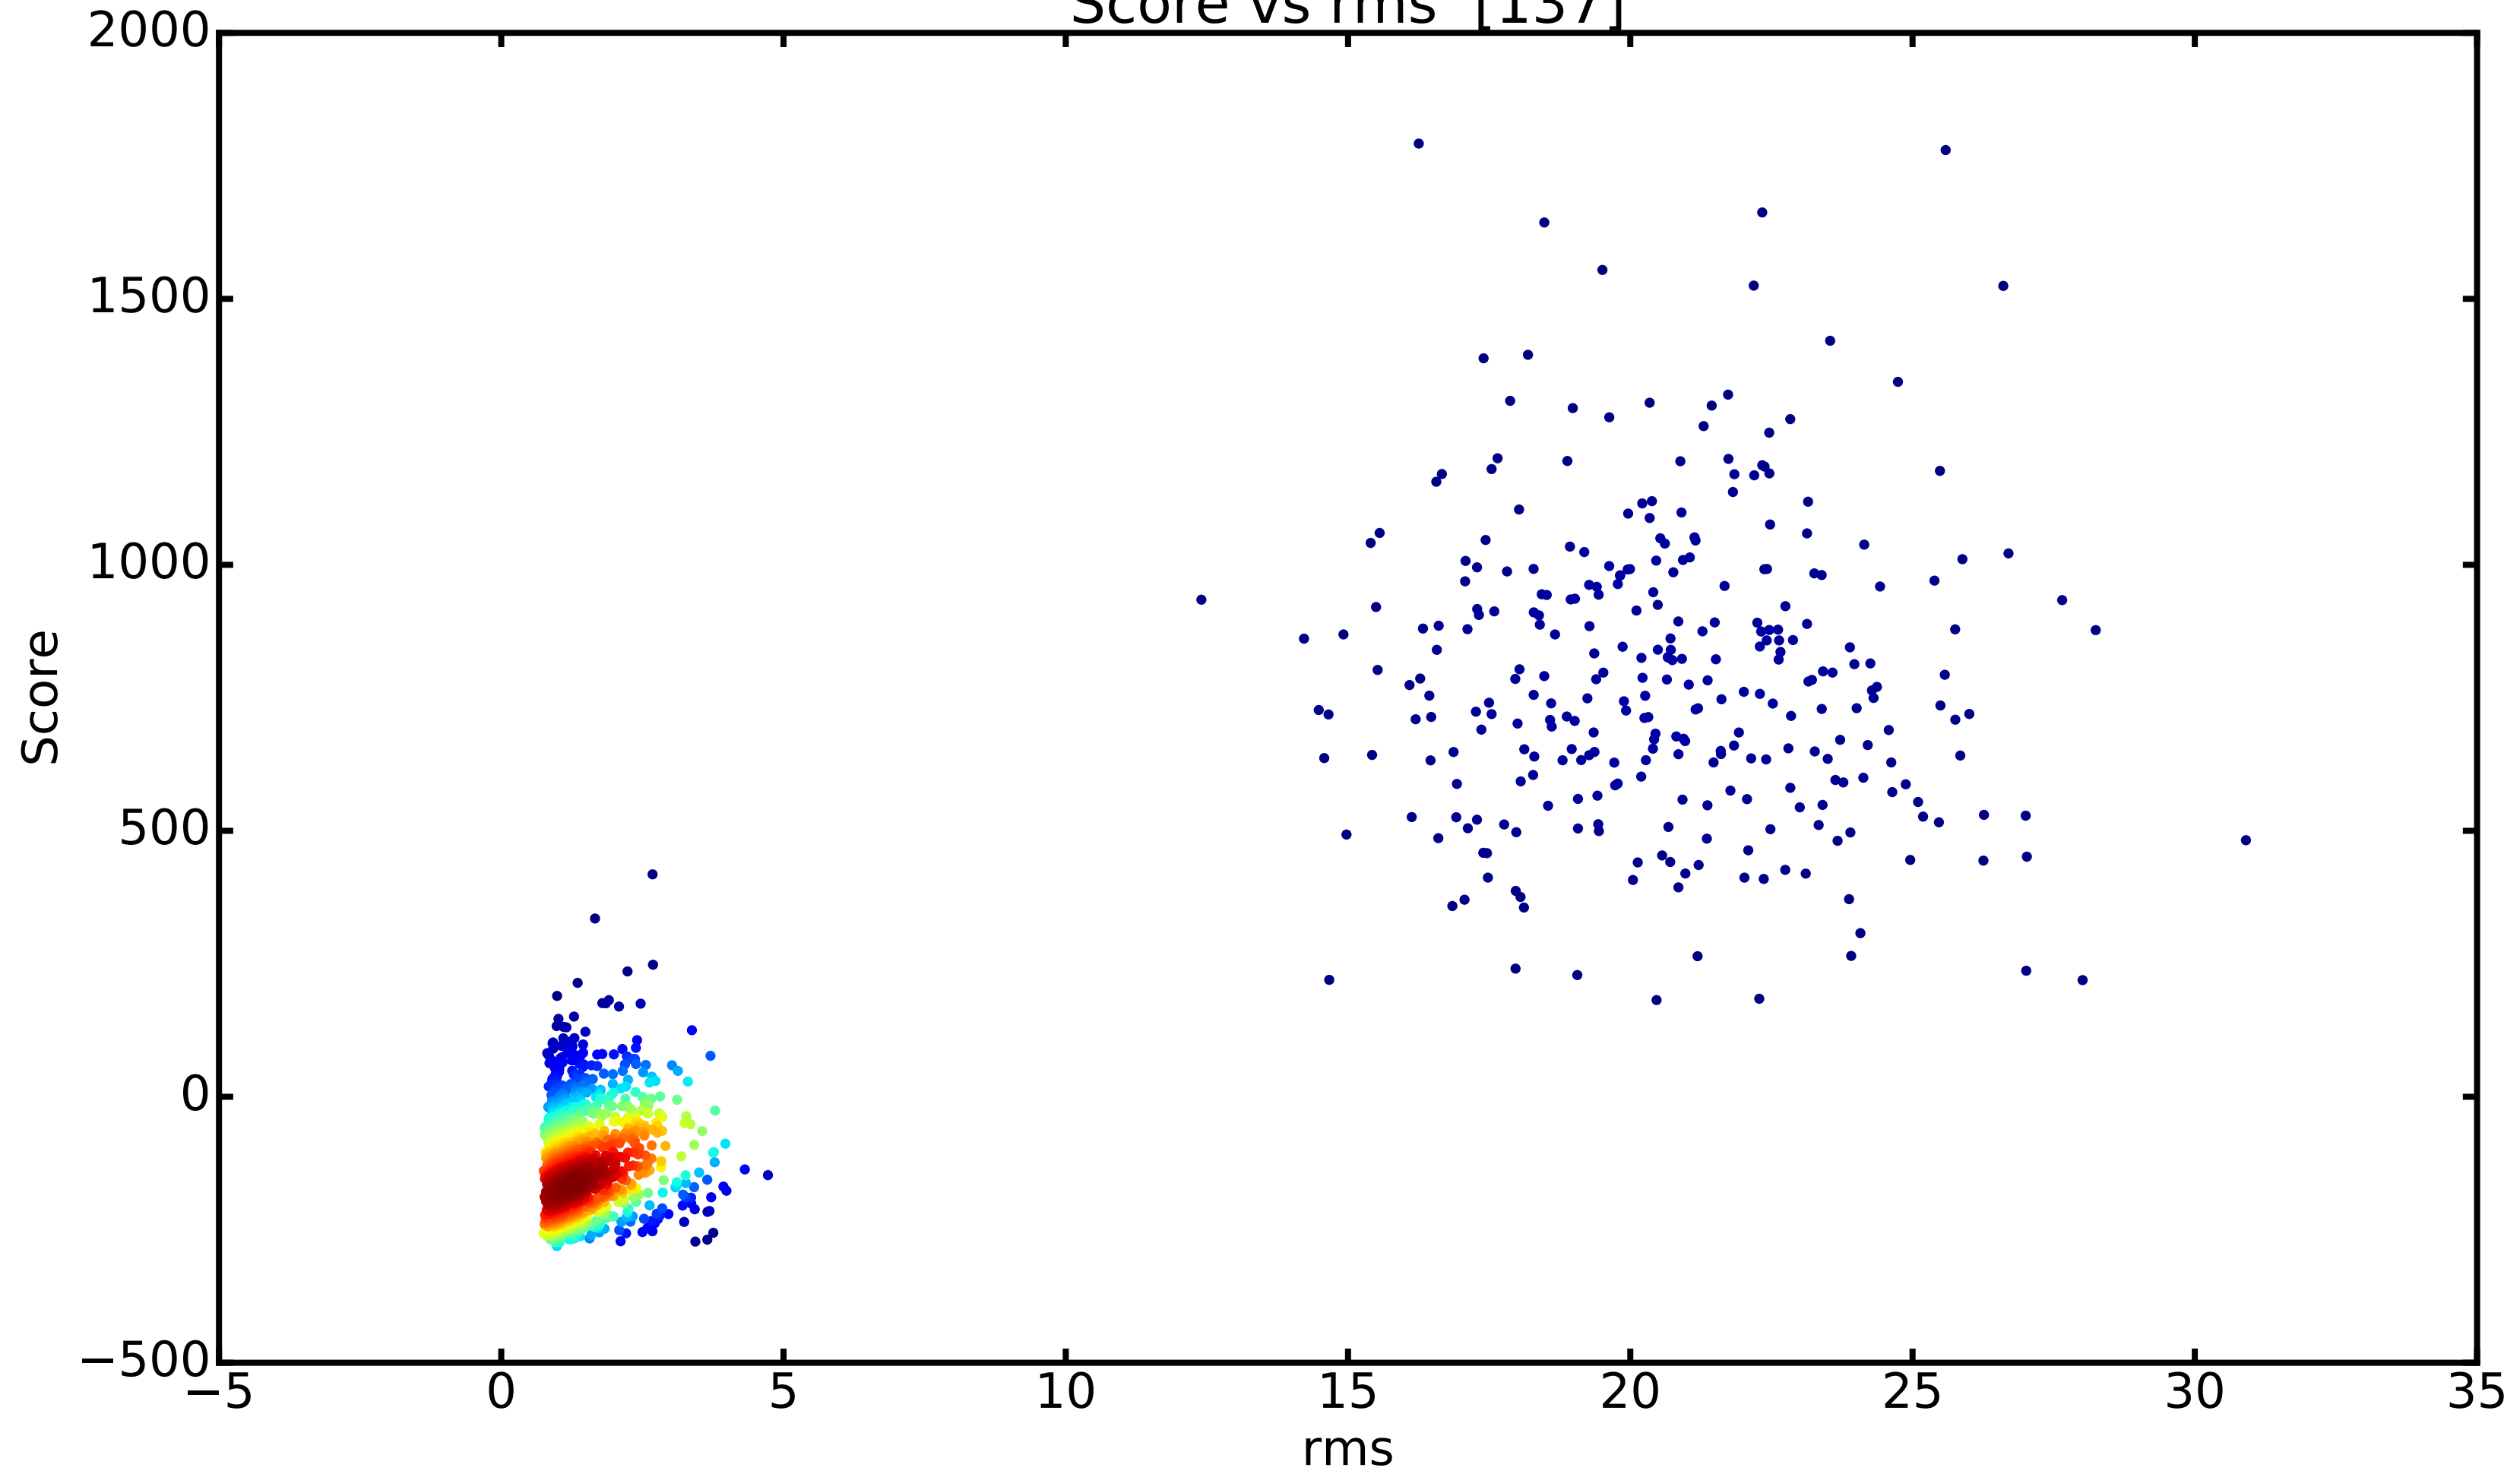

Score vs rms [137]

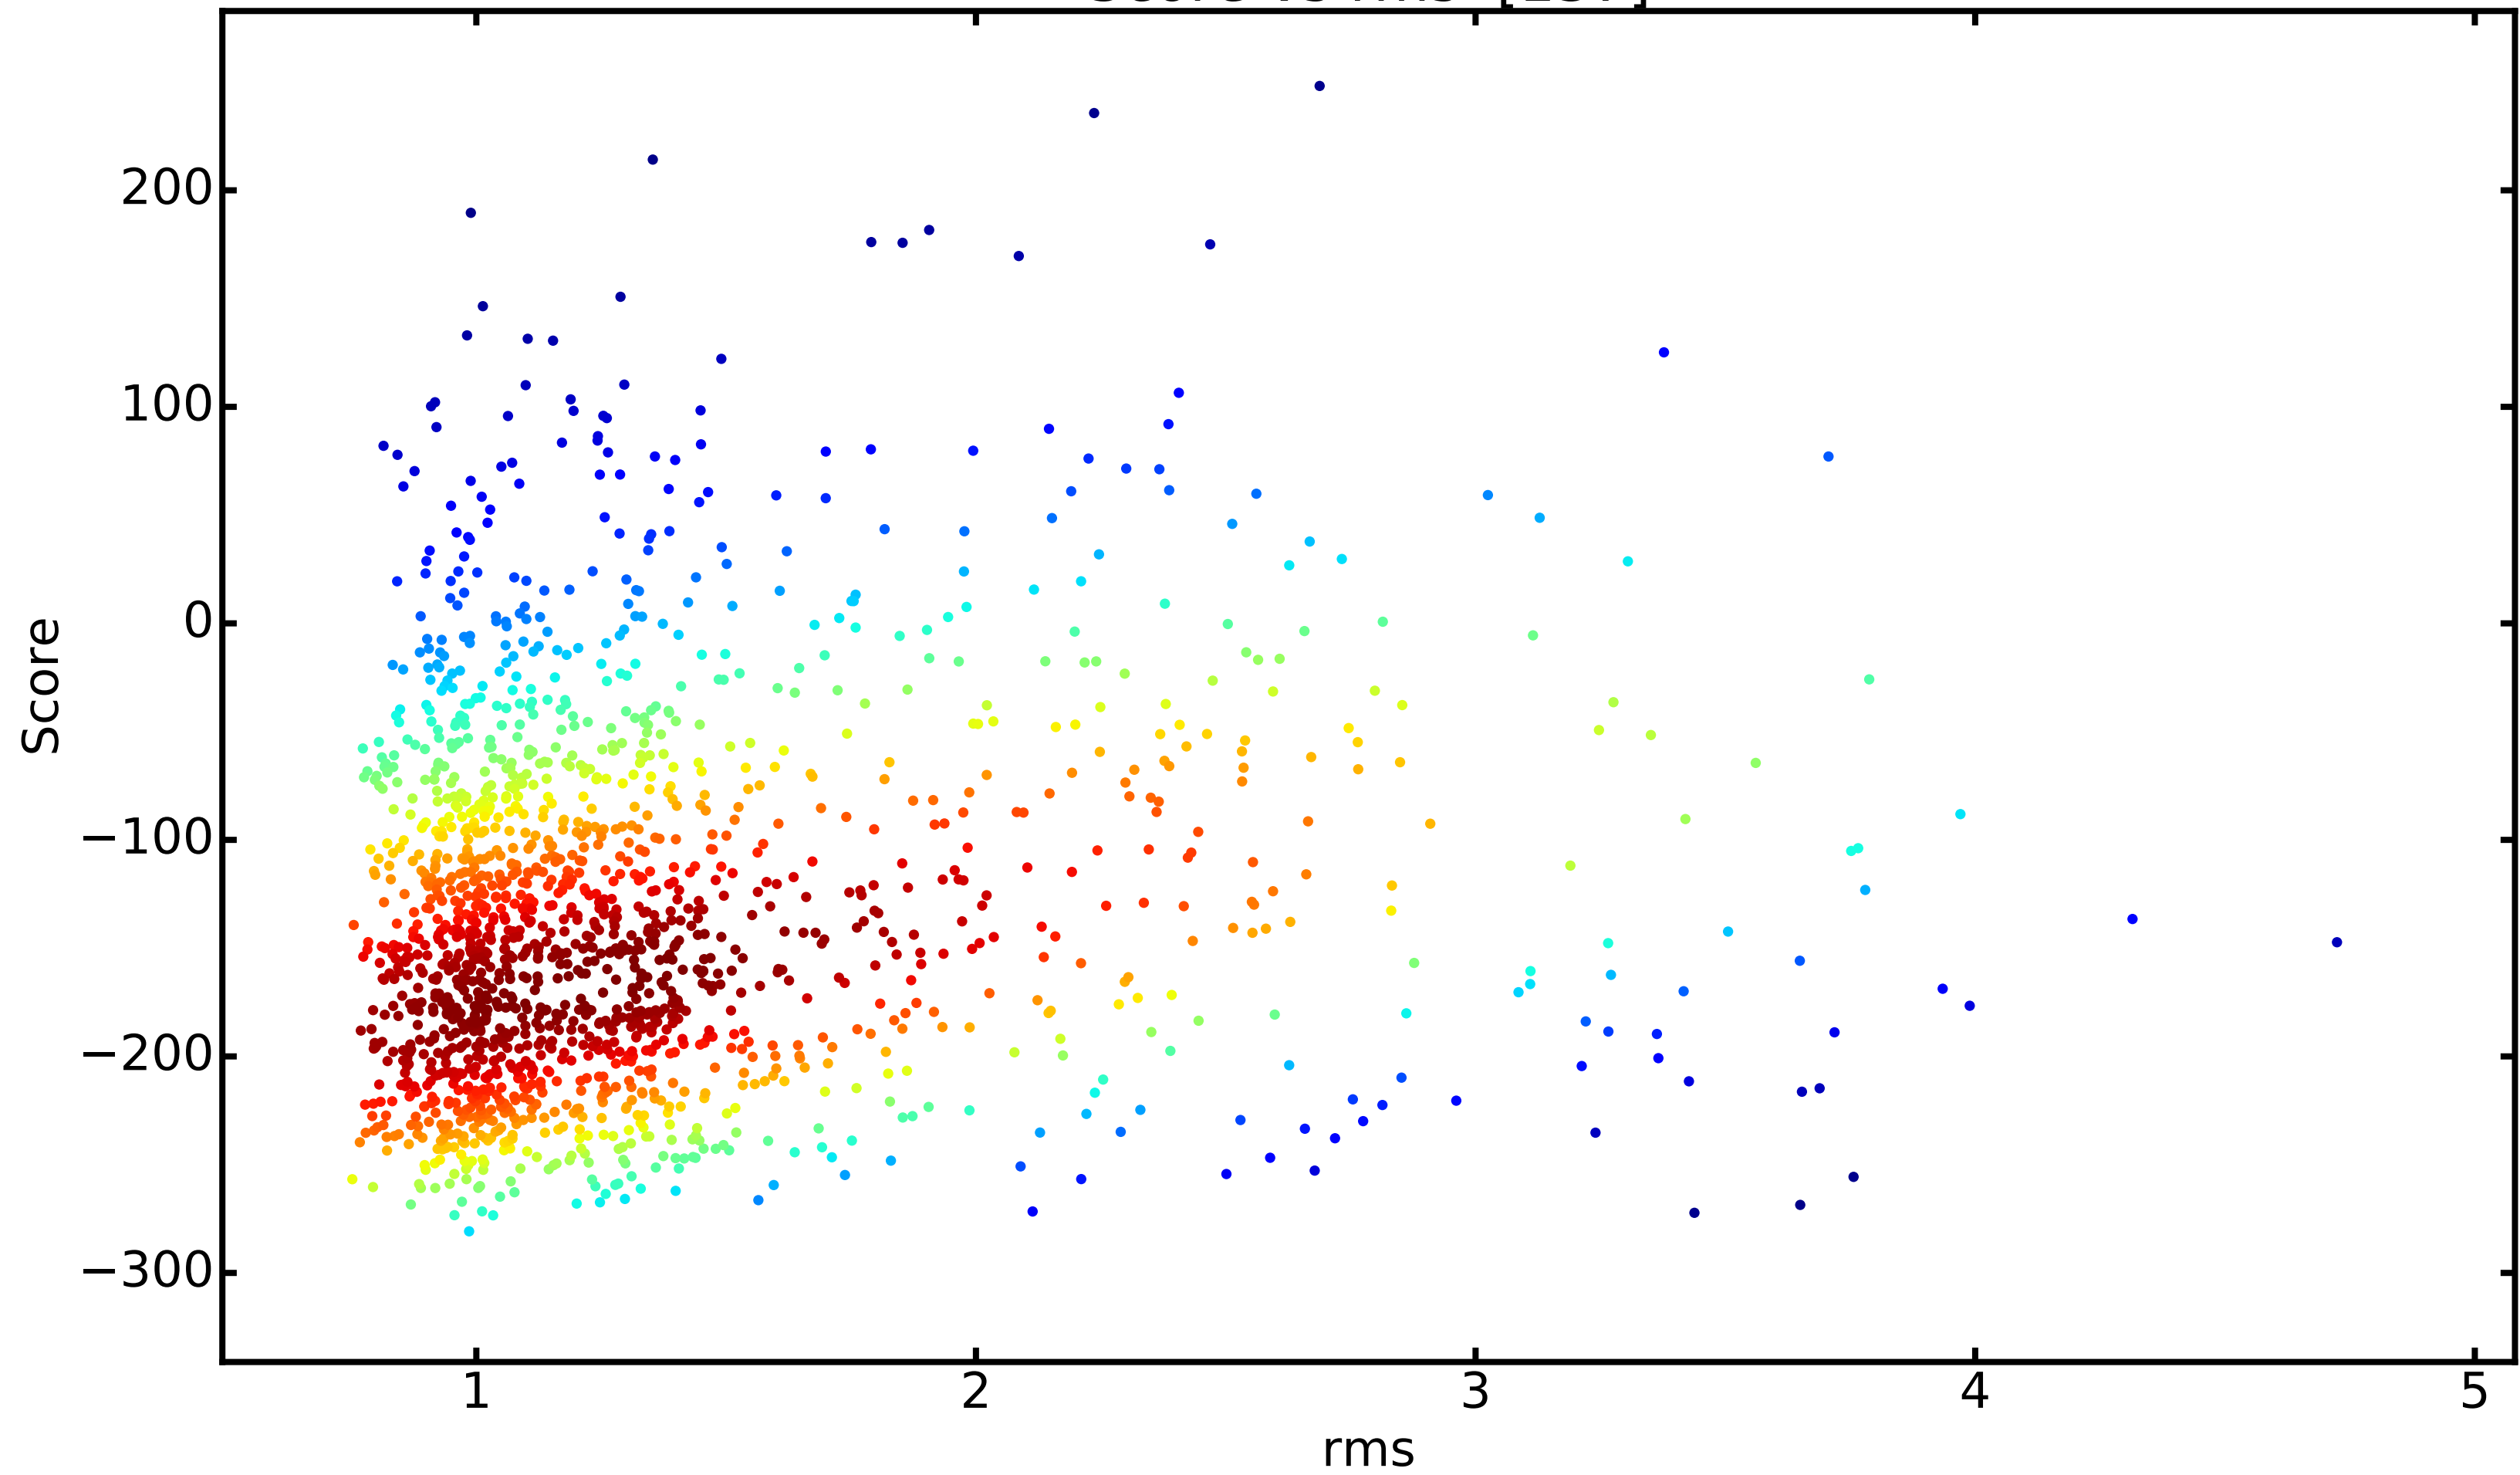

Score vs rms [140]

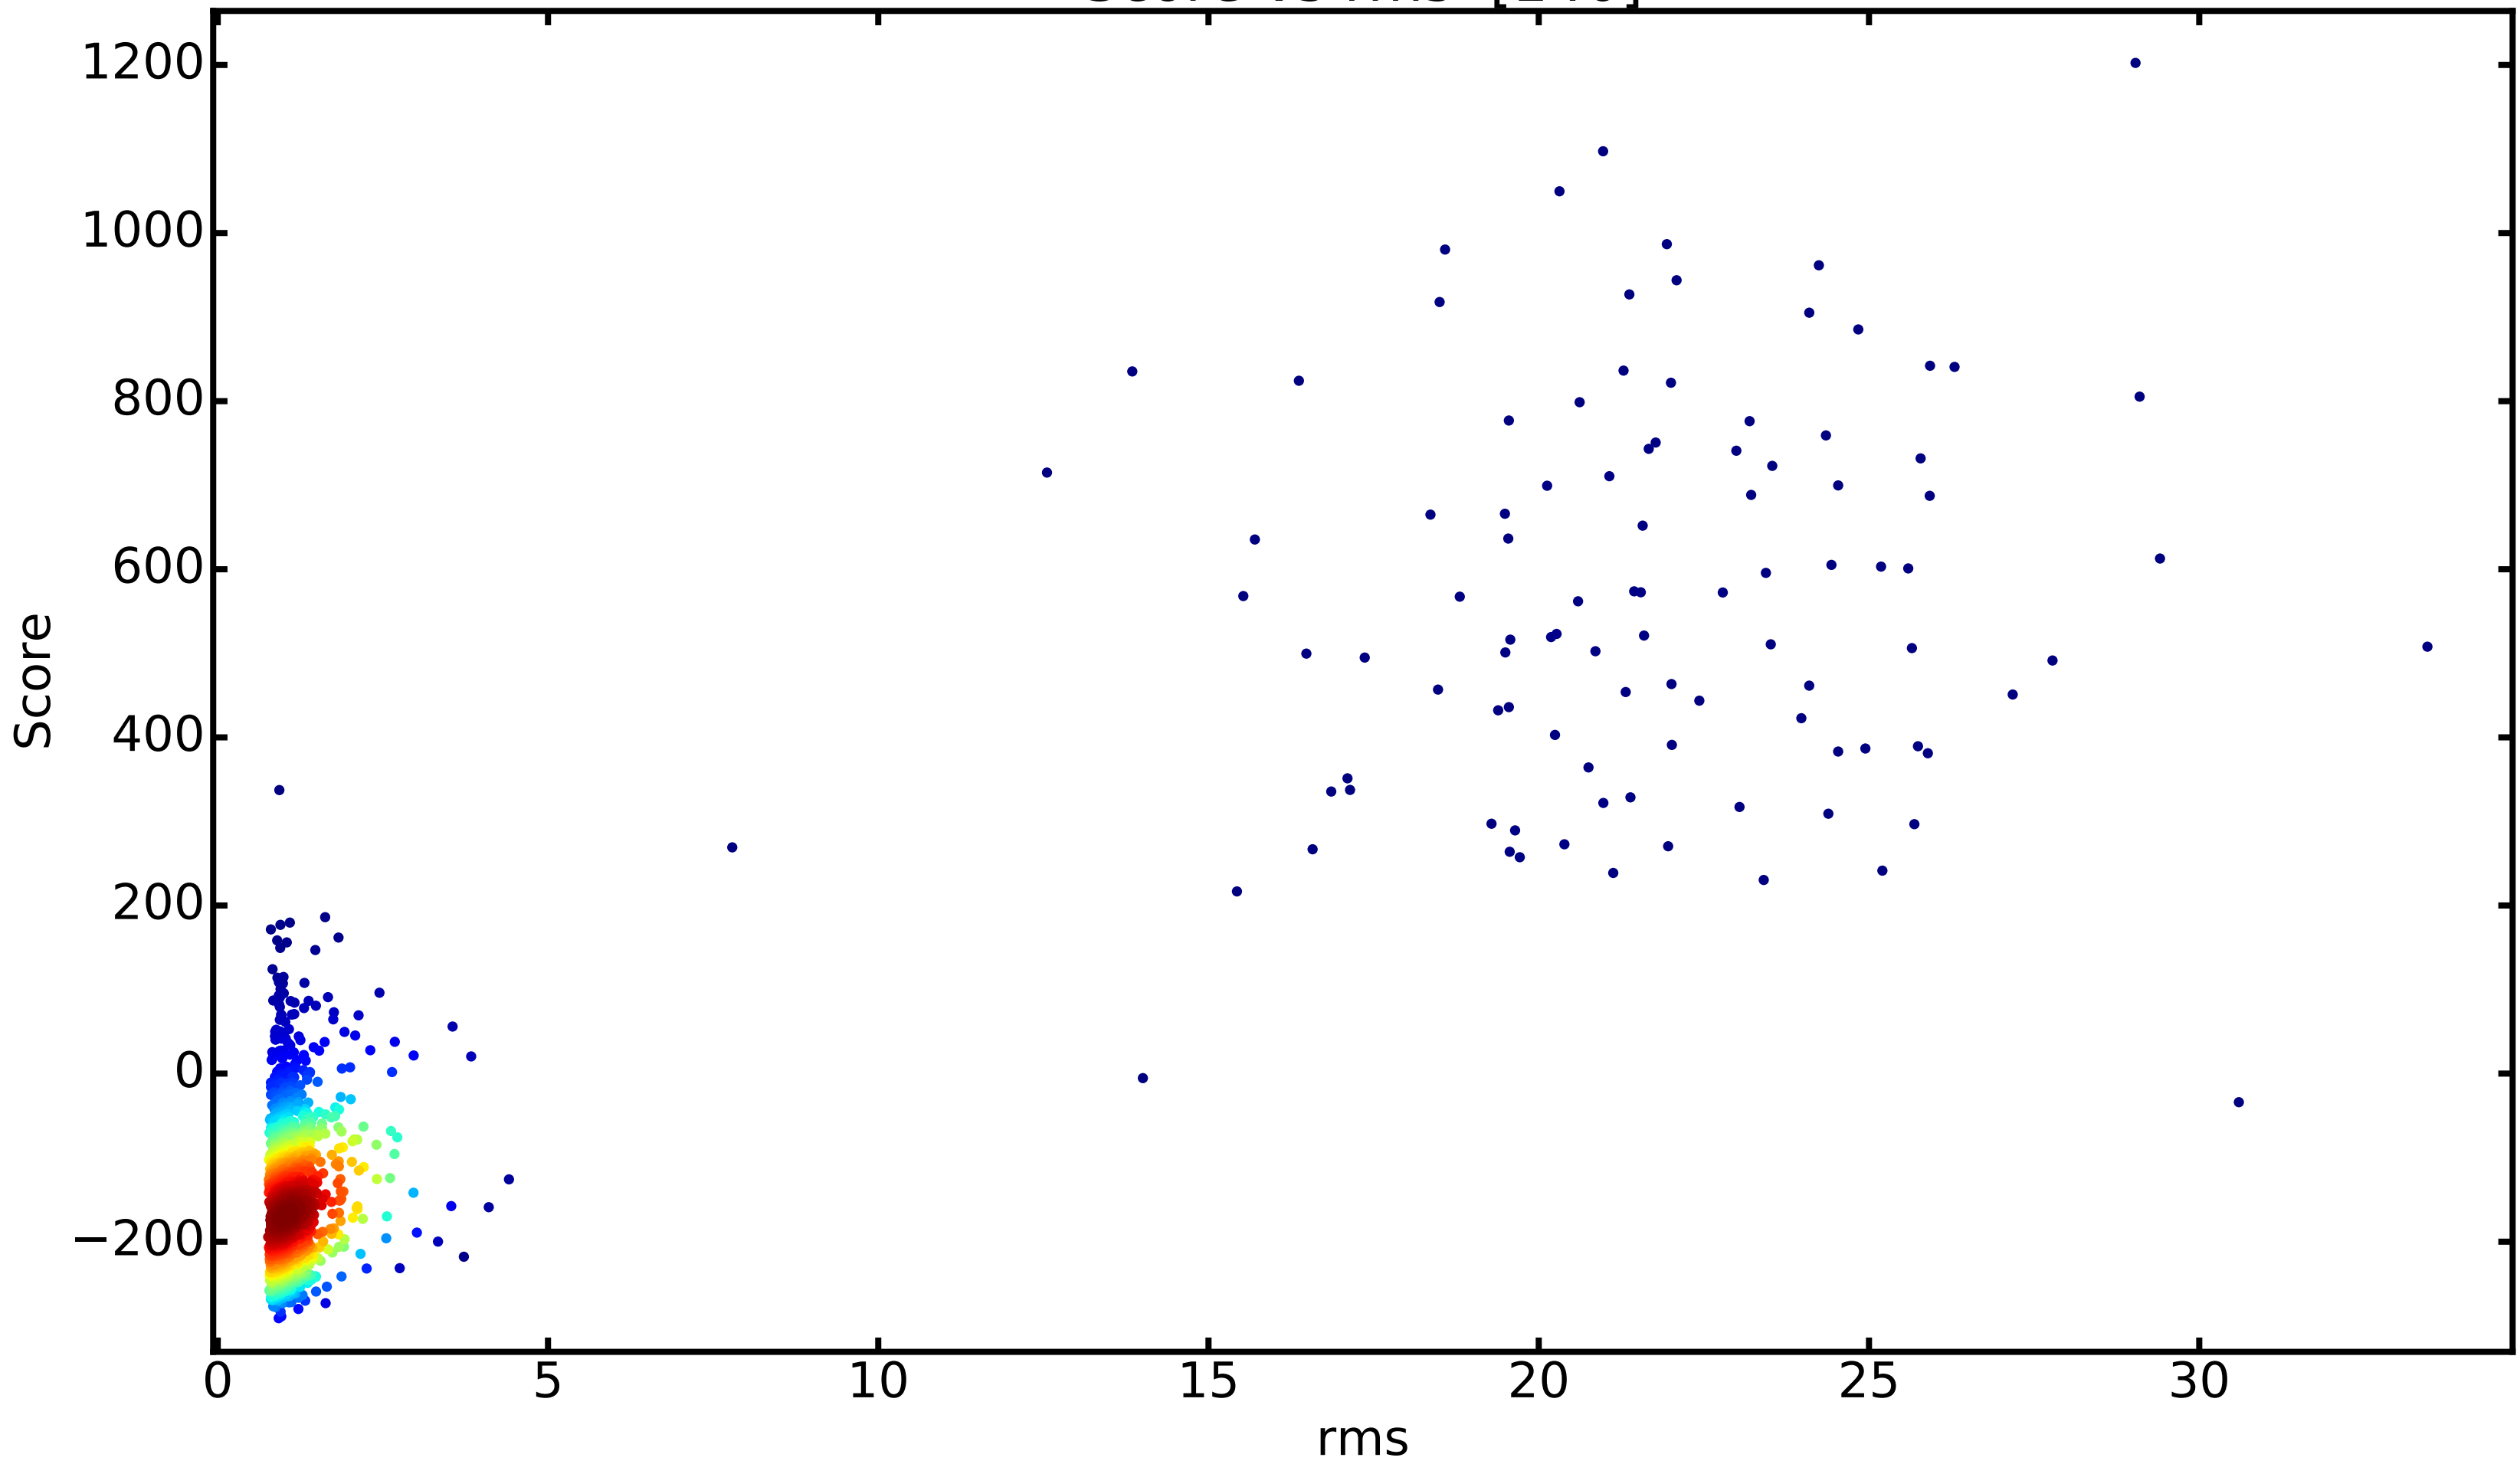

Score vs rms [140]

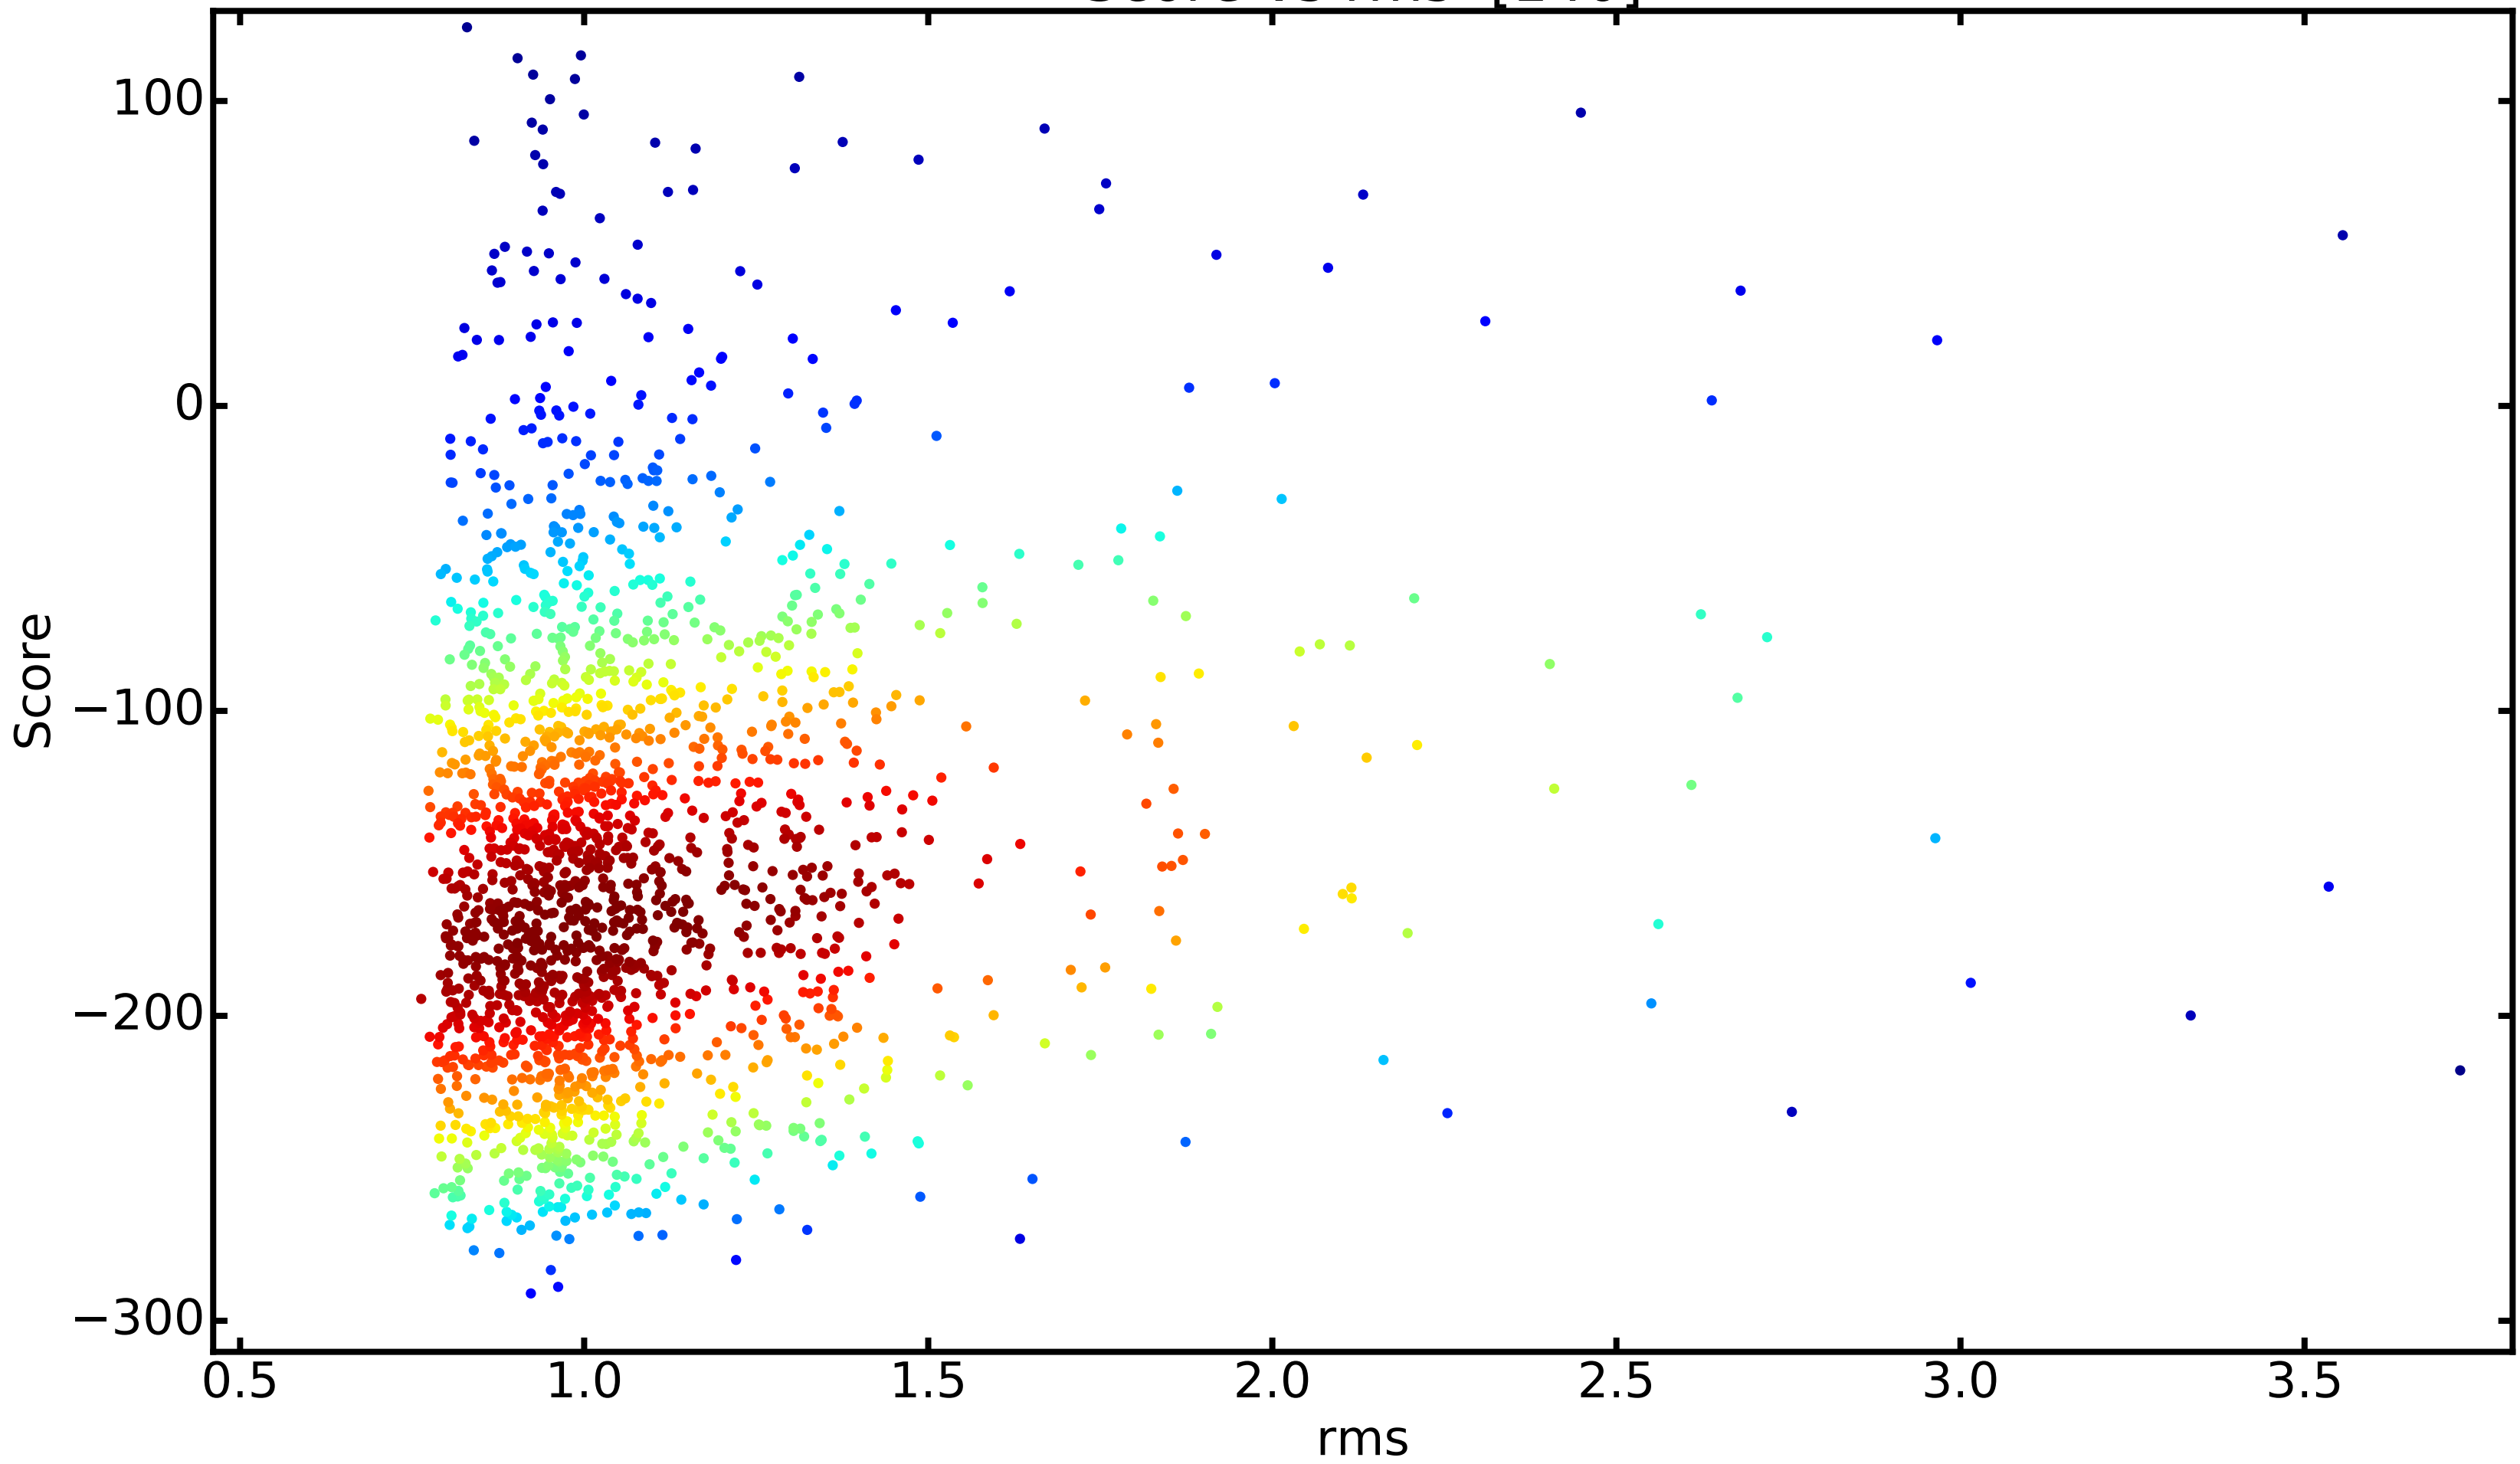

Score vs rms [142]

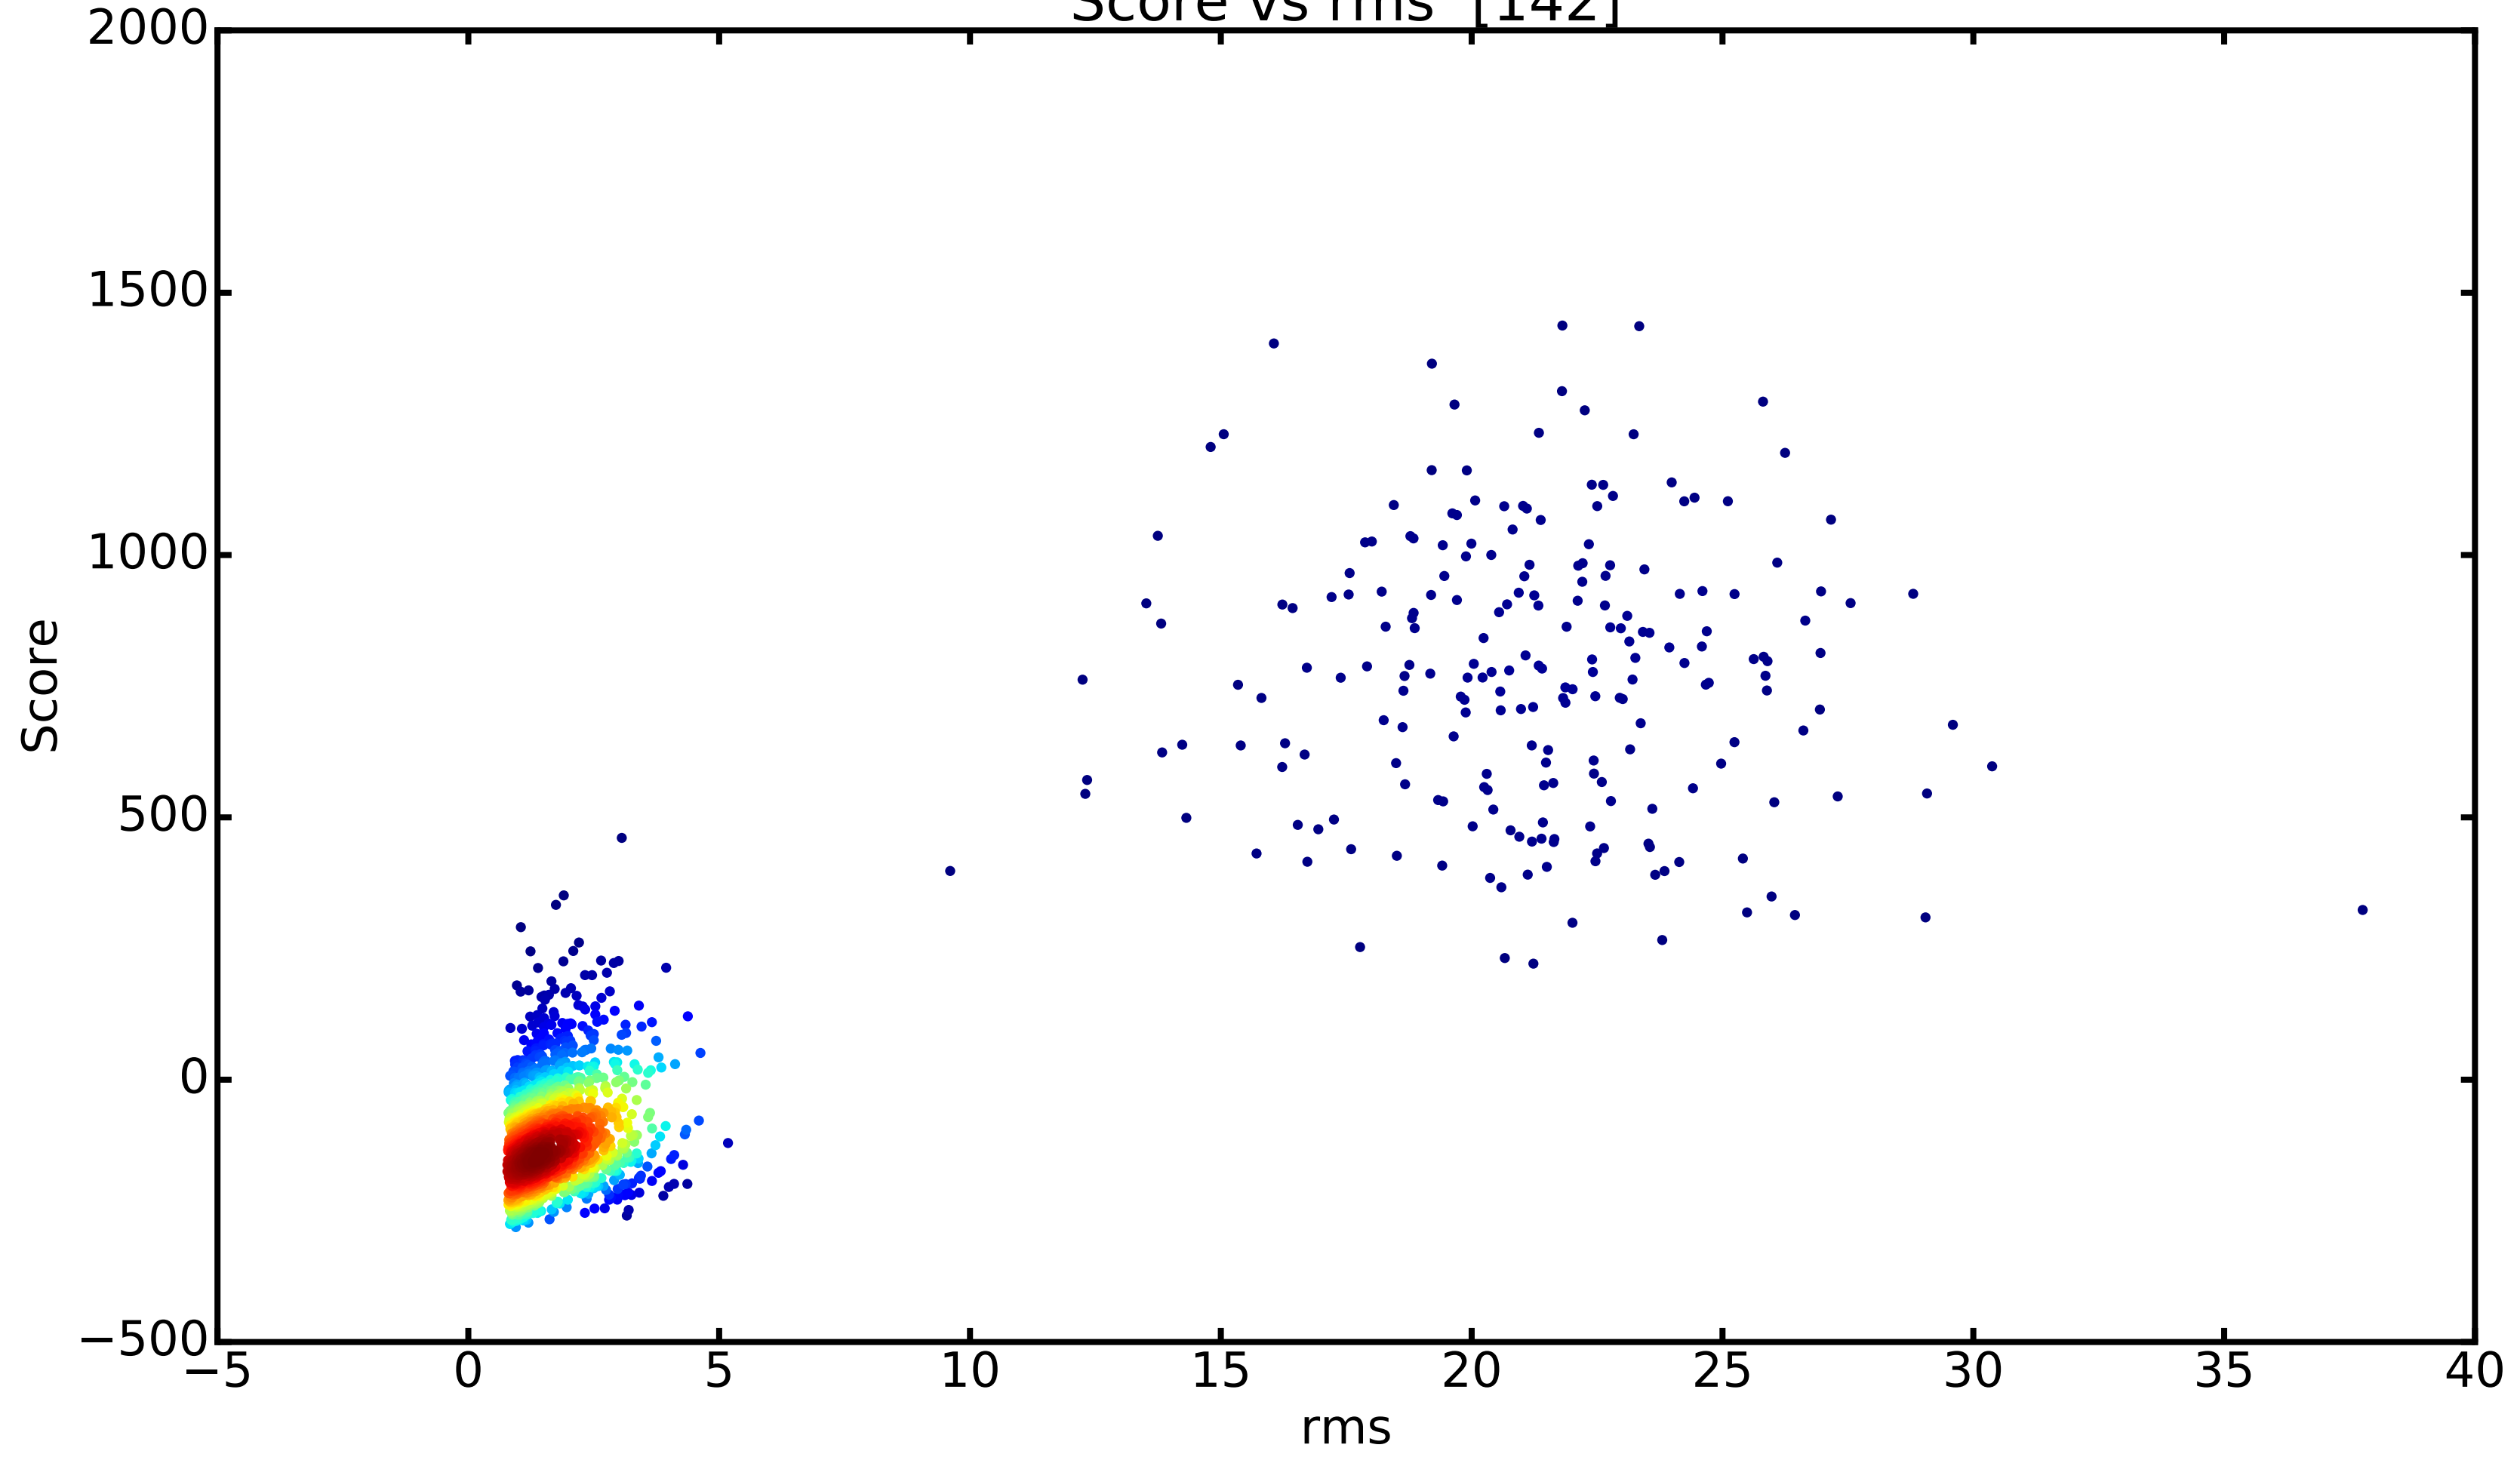

Score vs rms [142]

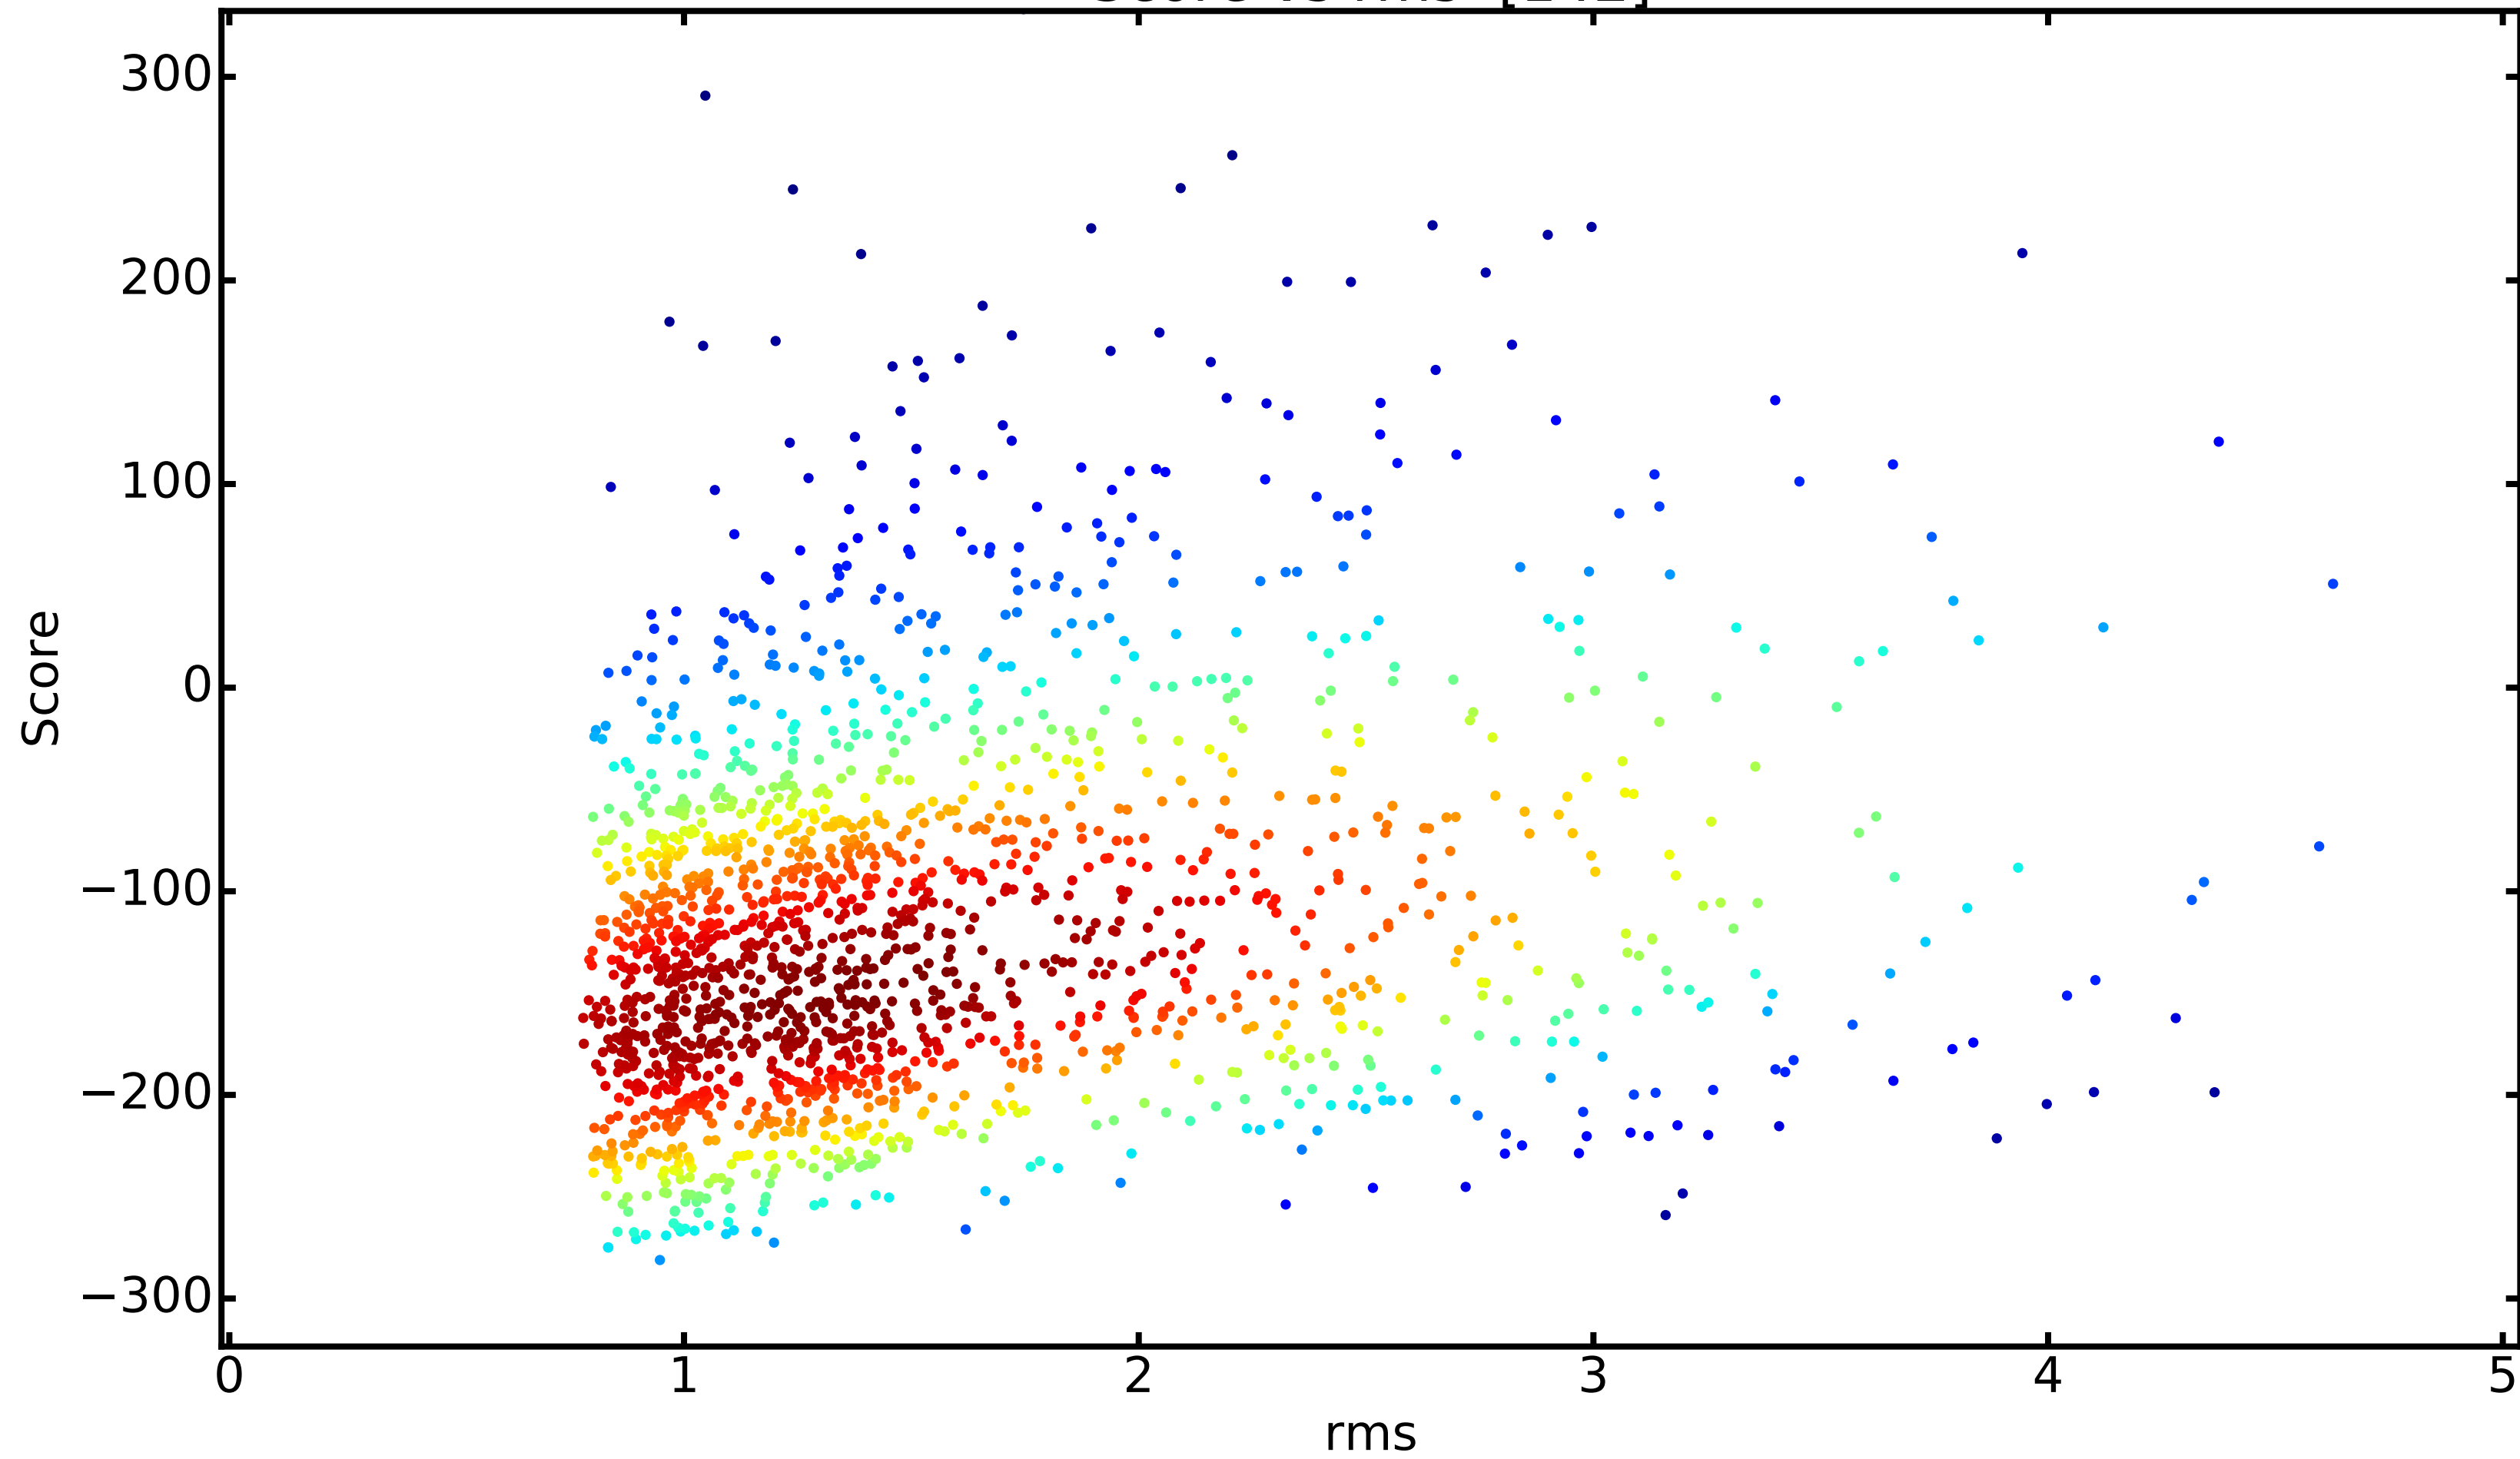

Score vs rms [152]

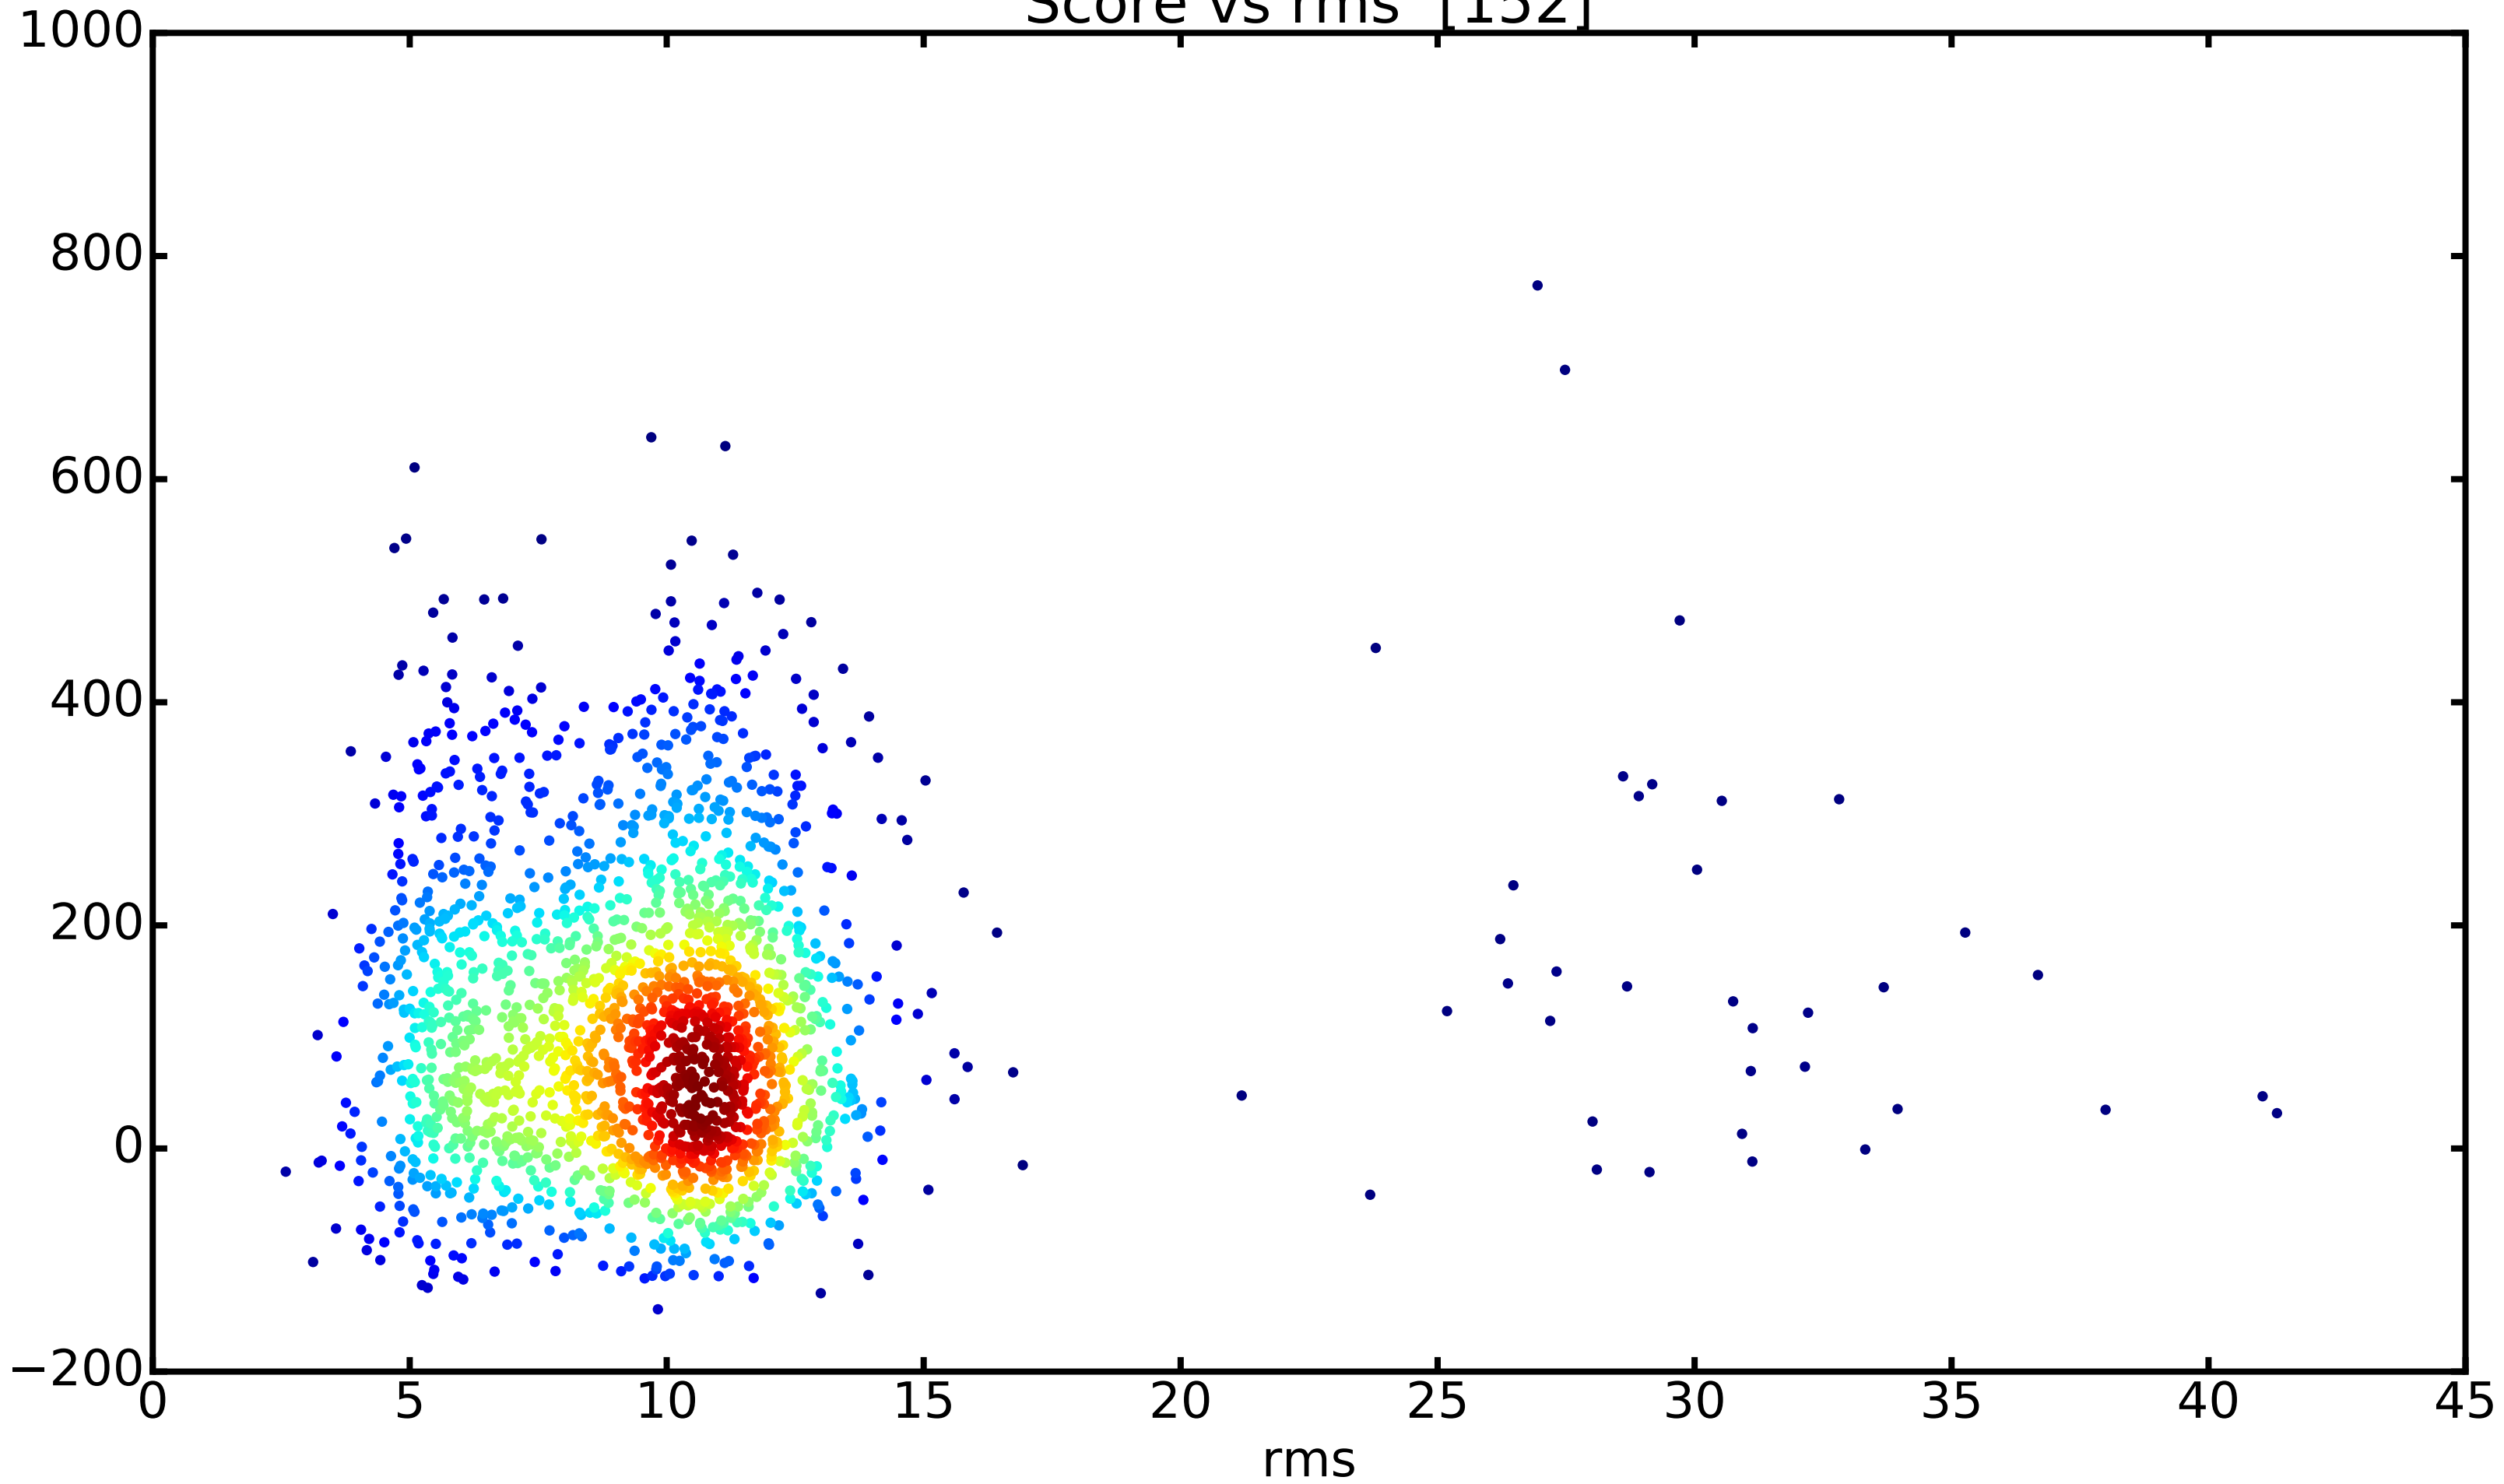



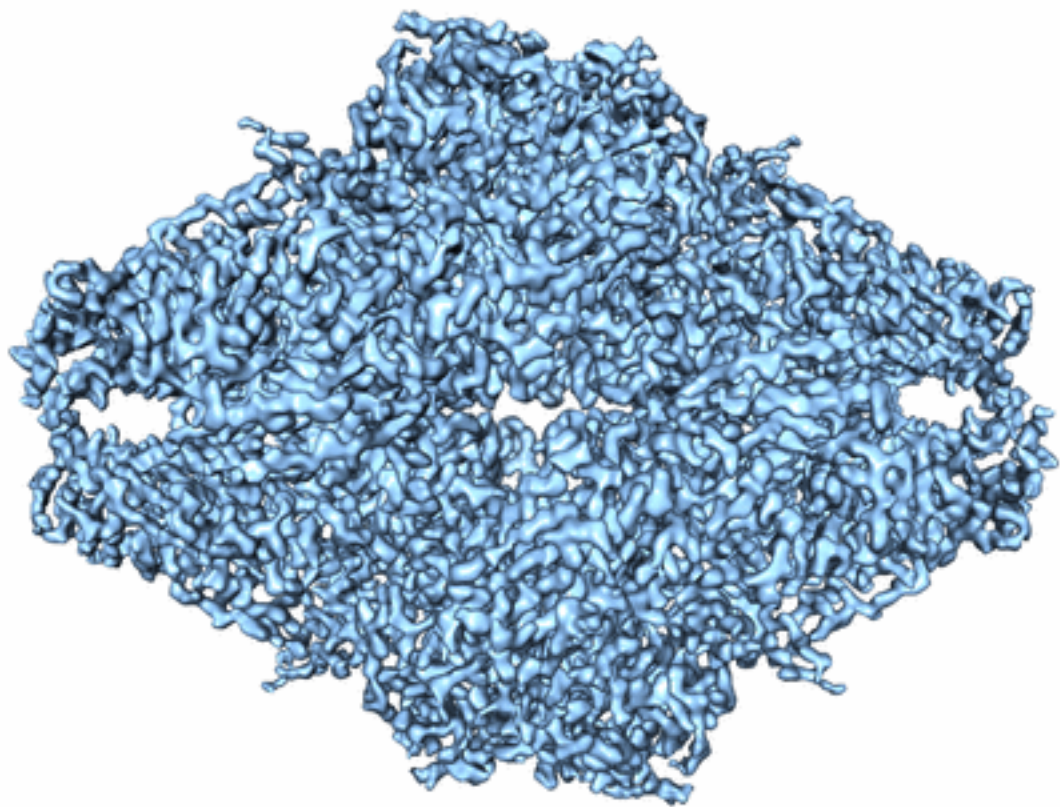

Score vs rms [106]

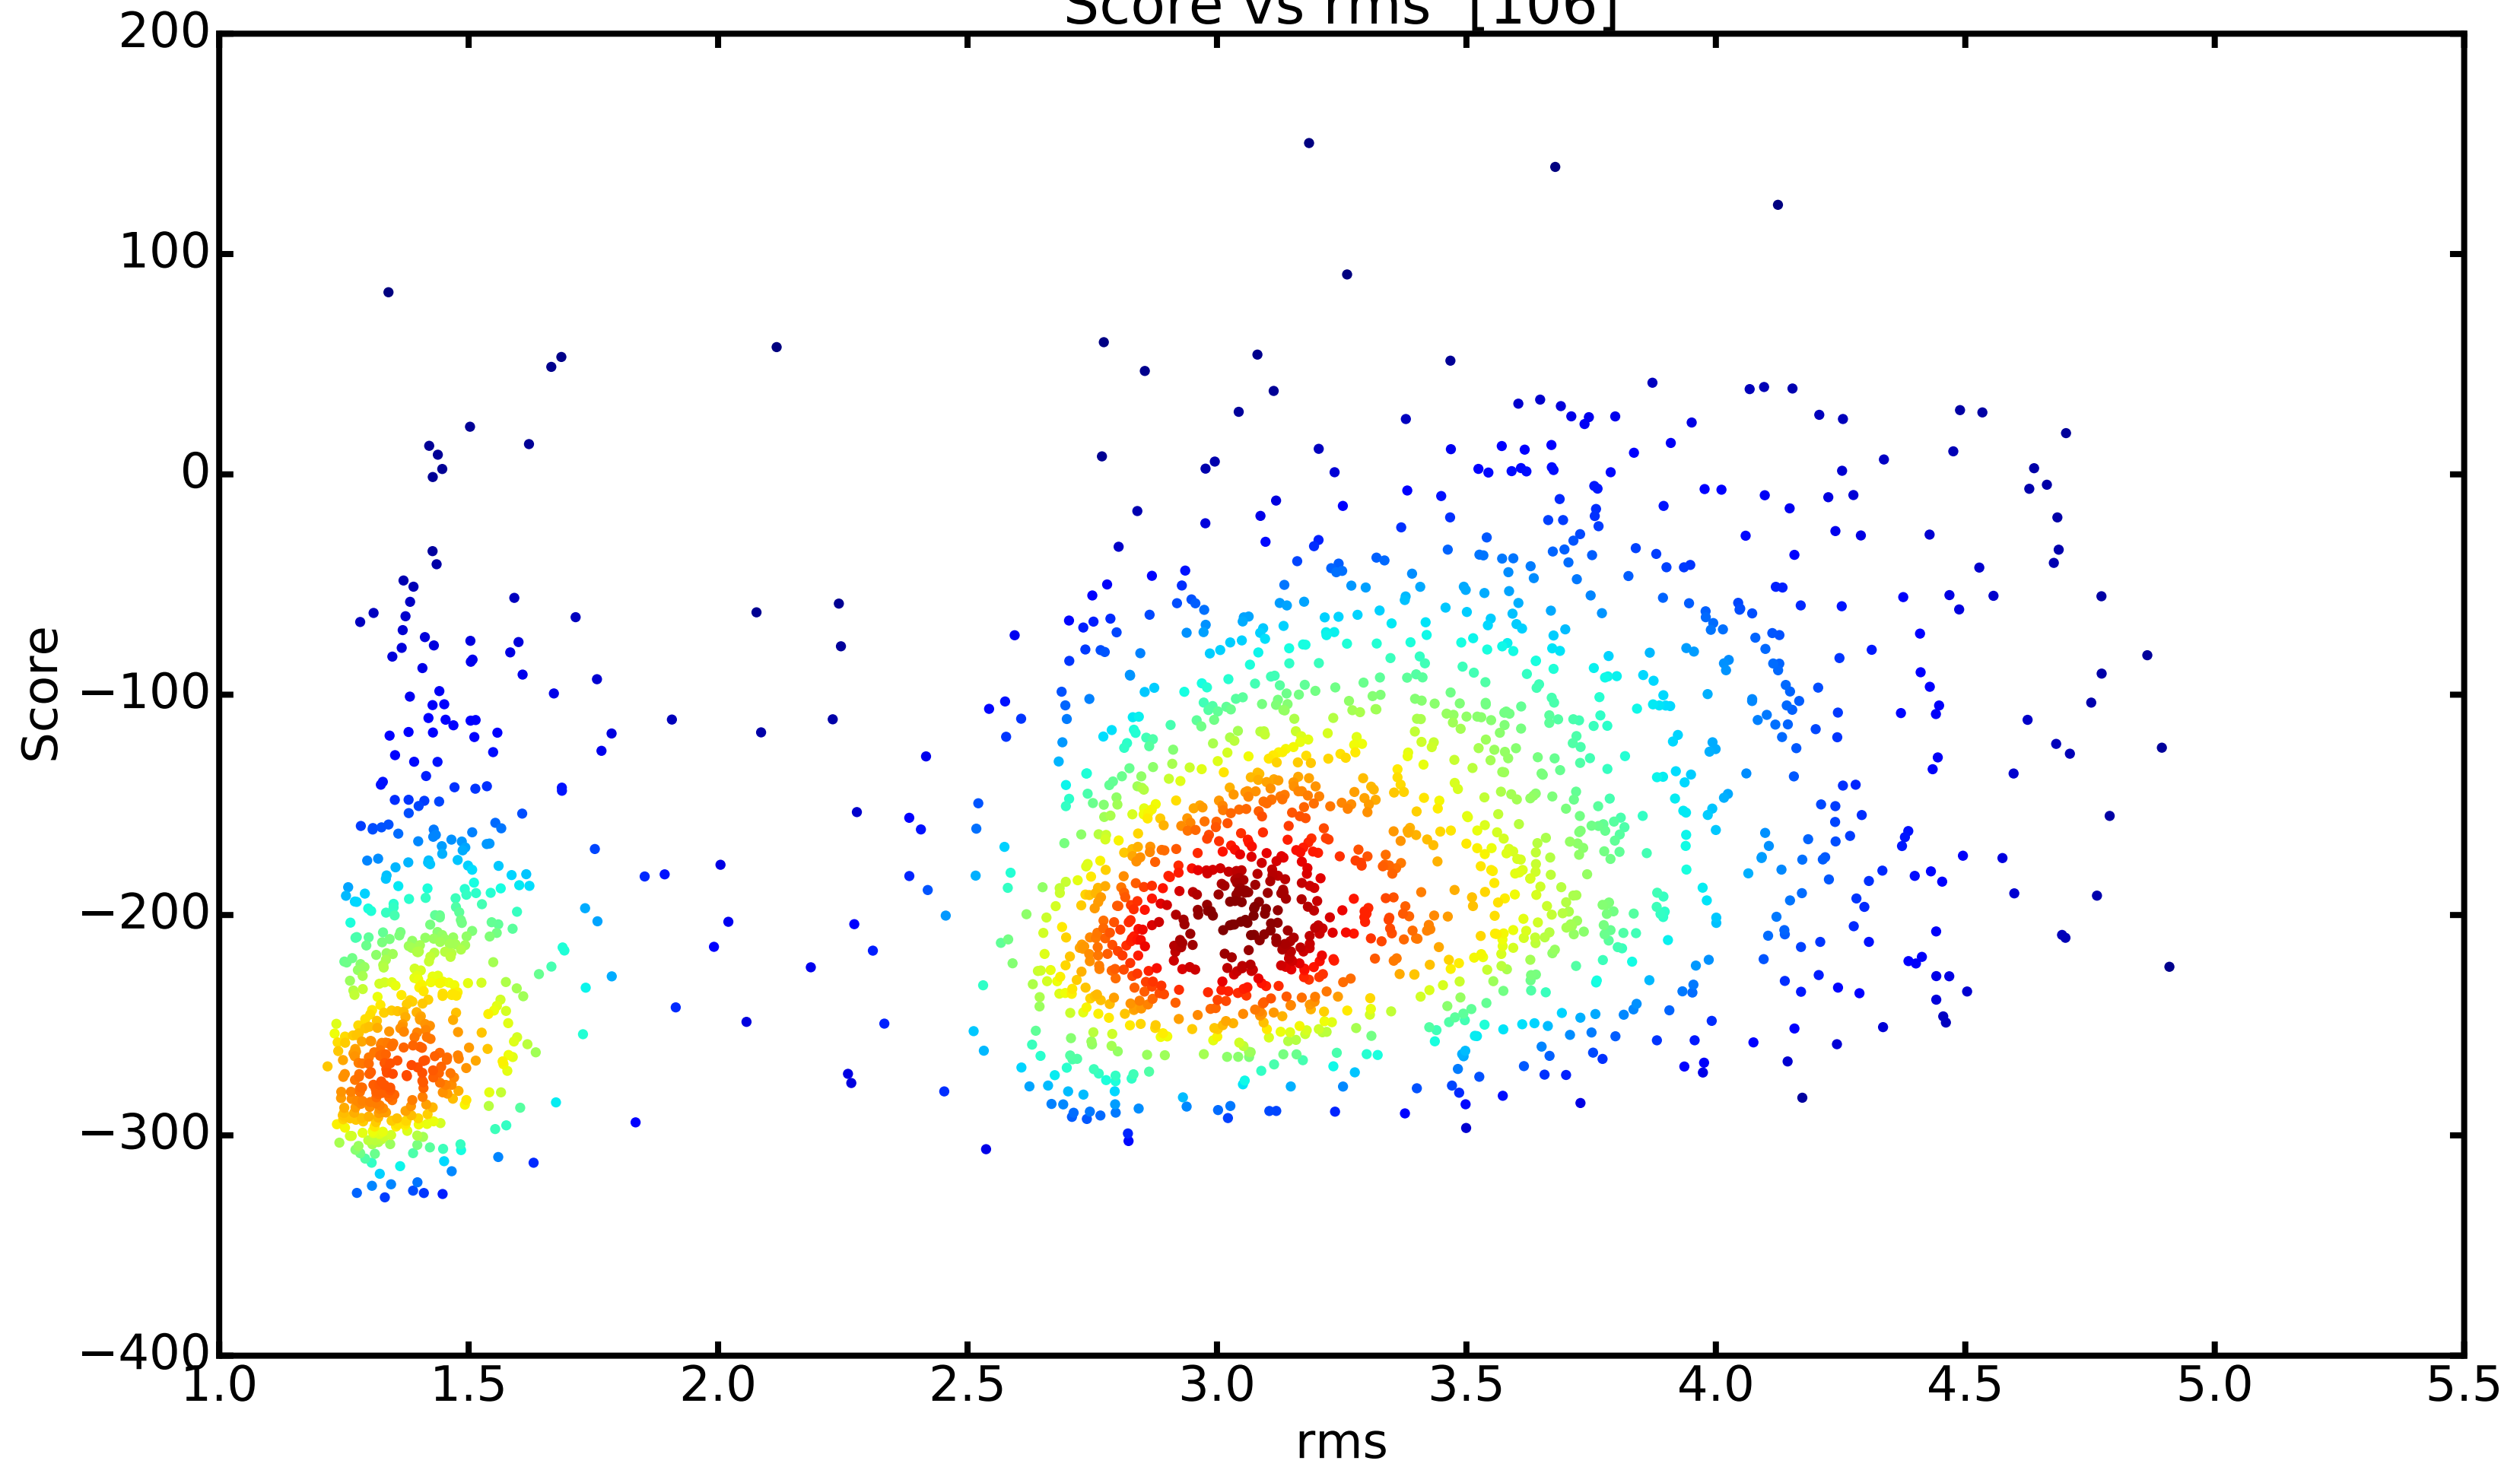

Score vs rms [113]

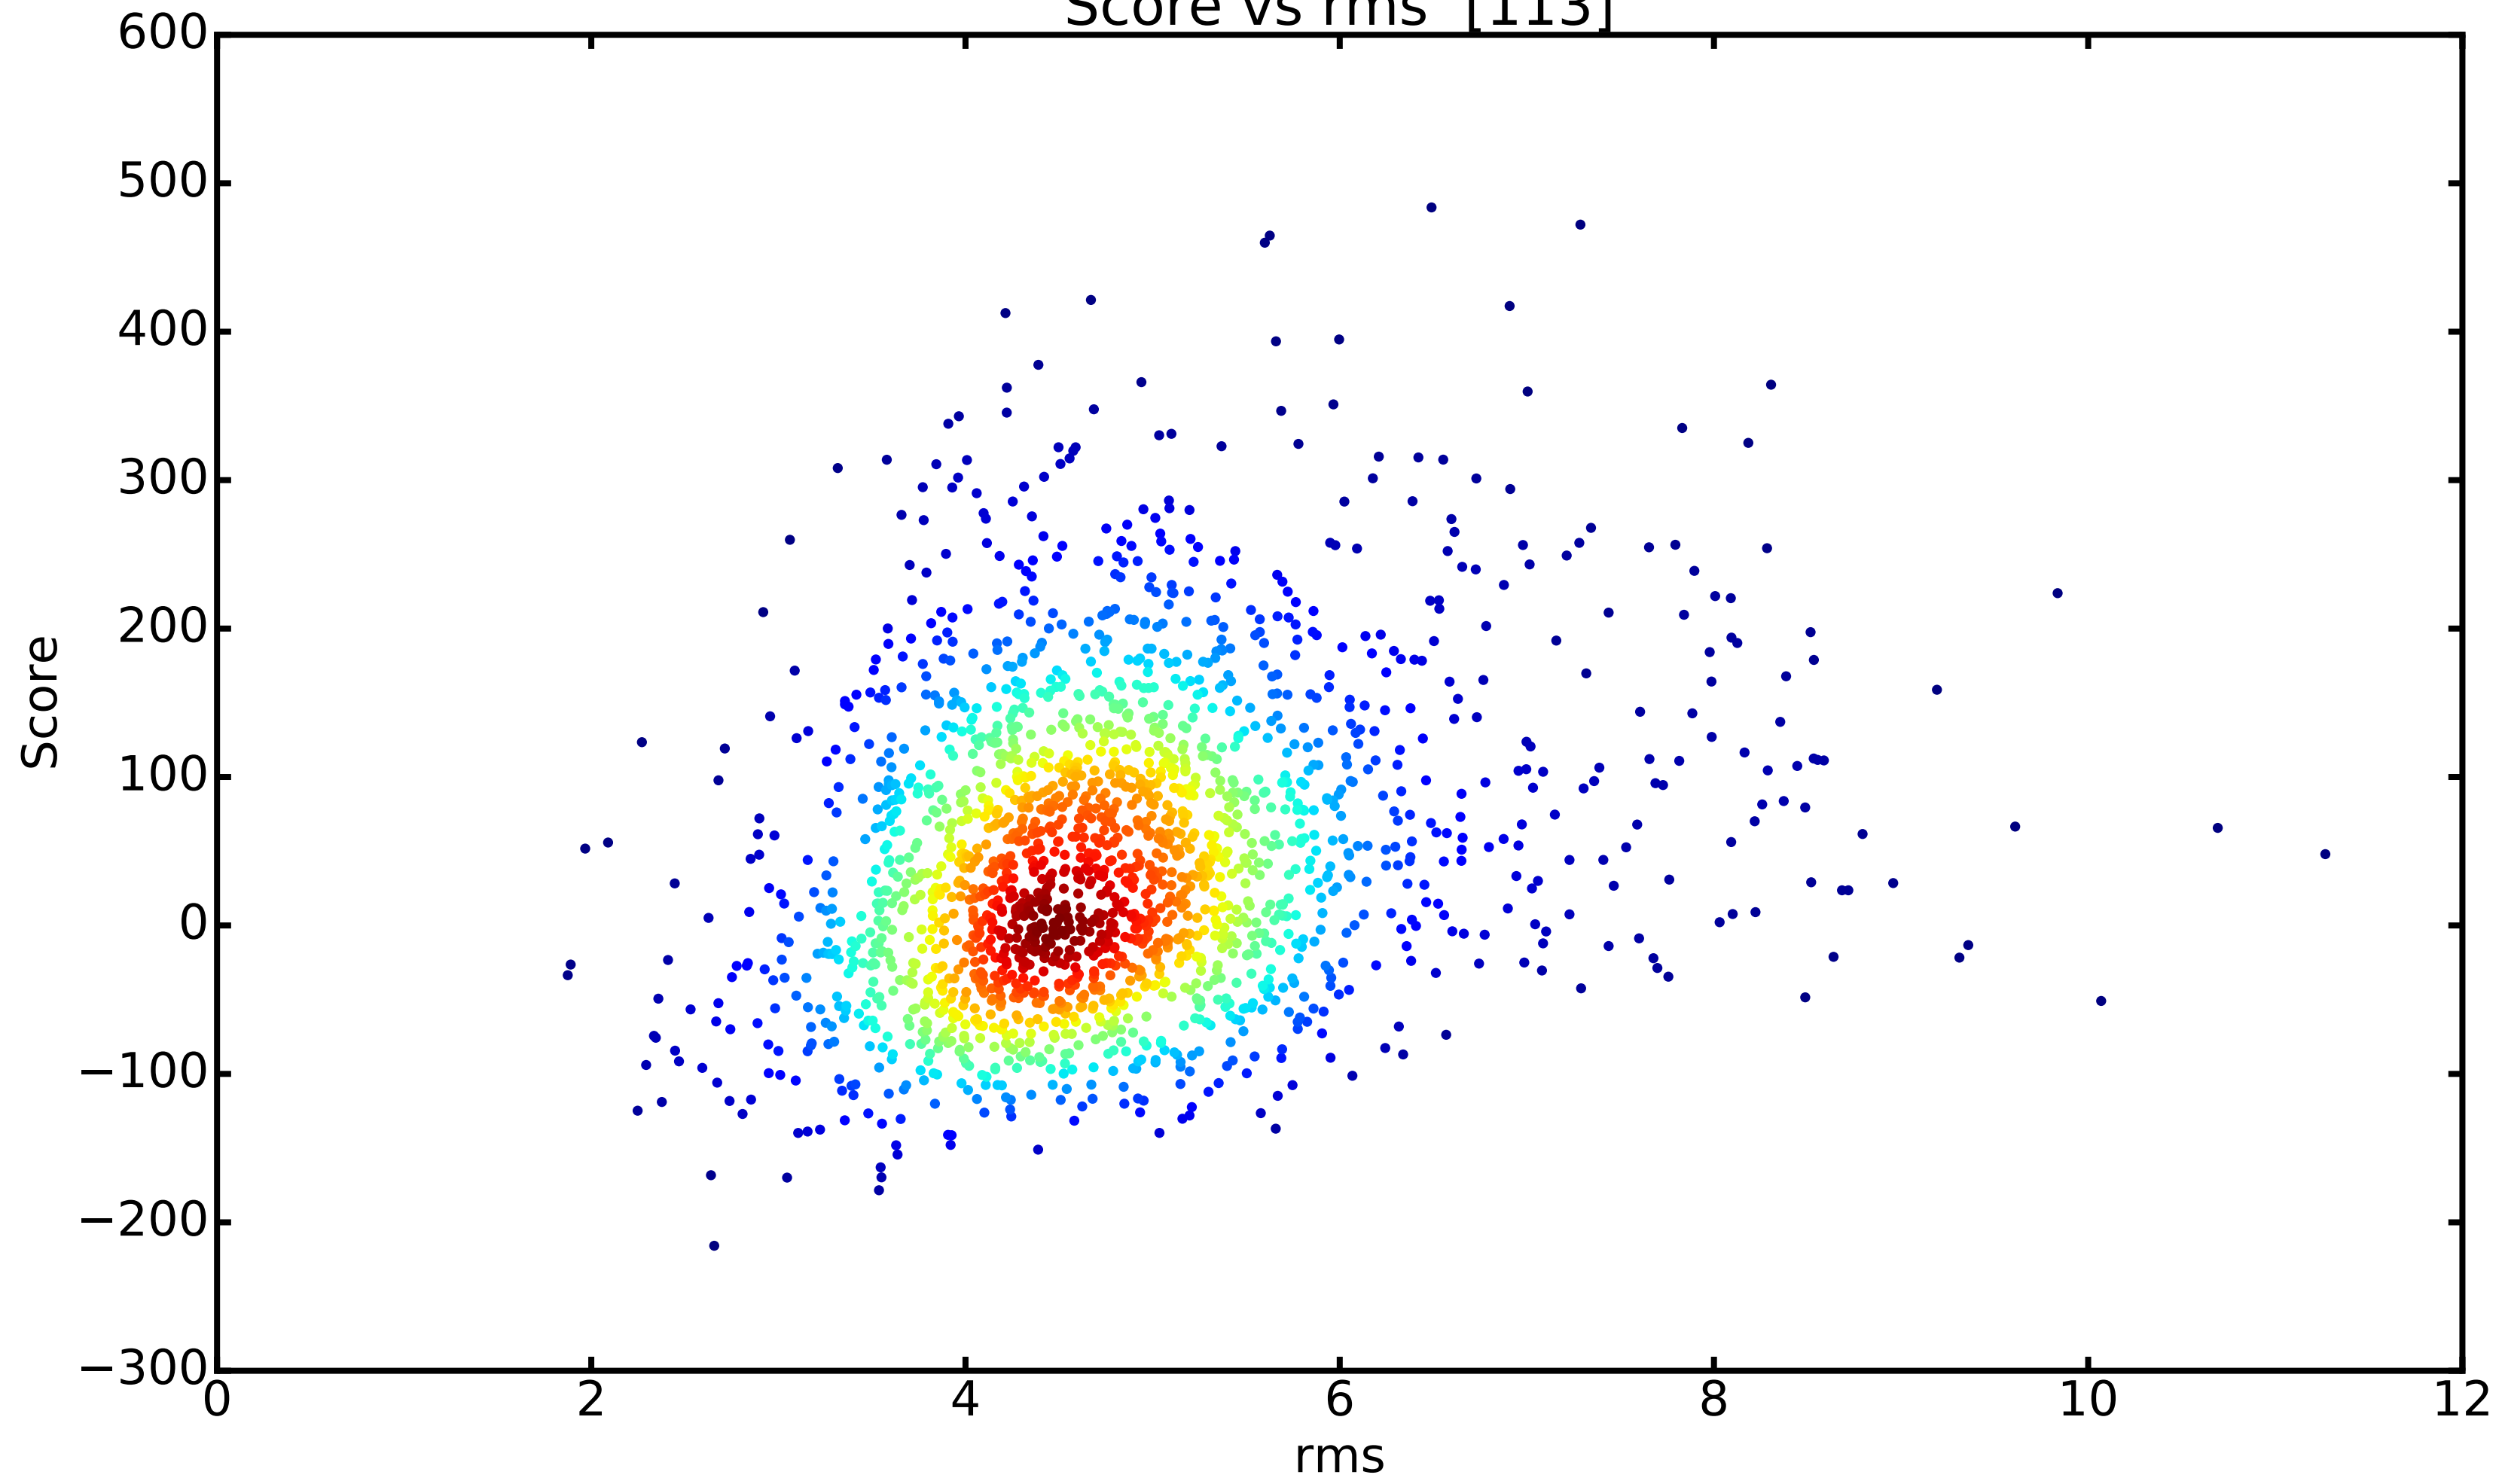

Score vs rms [116]

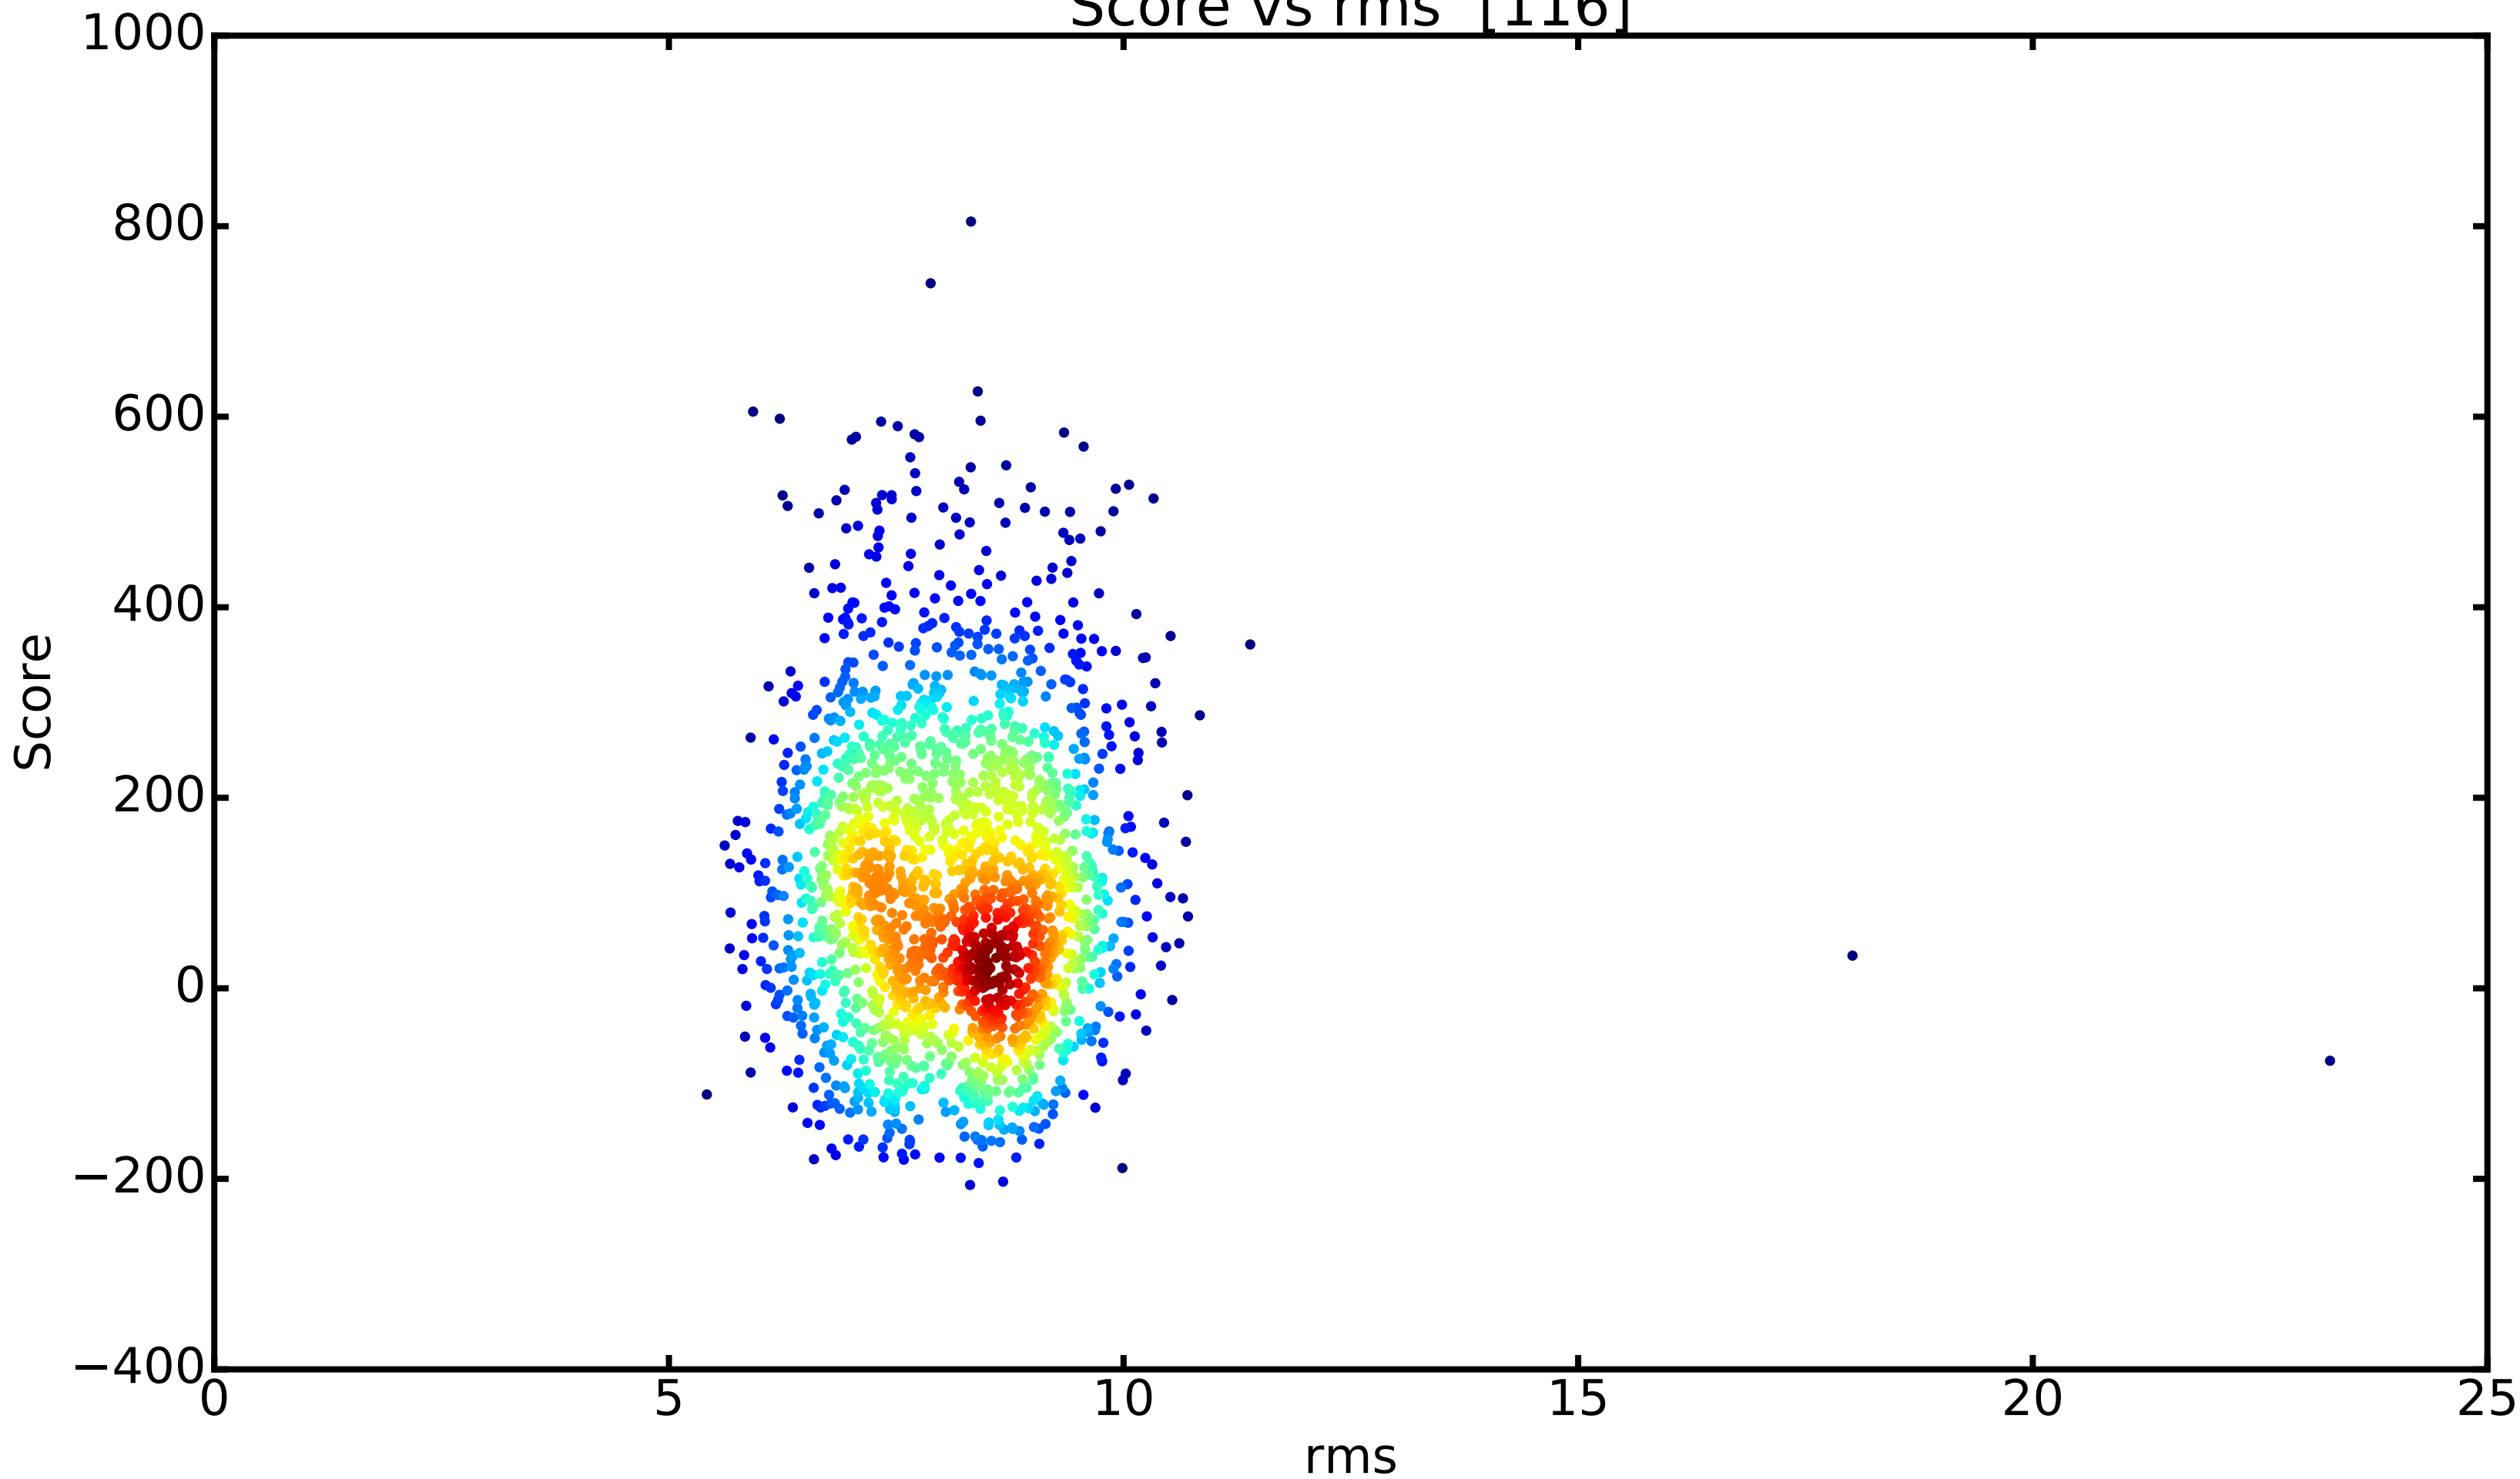

Score vs rms [116]

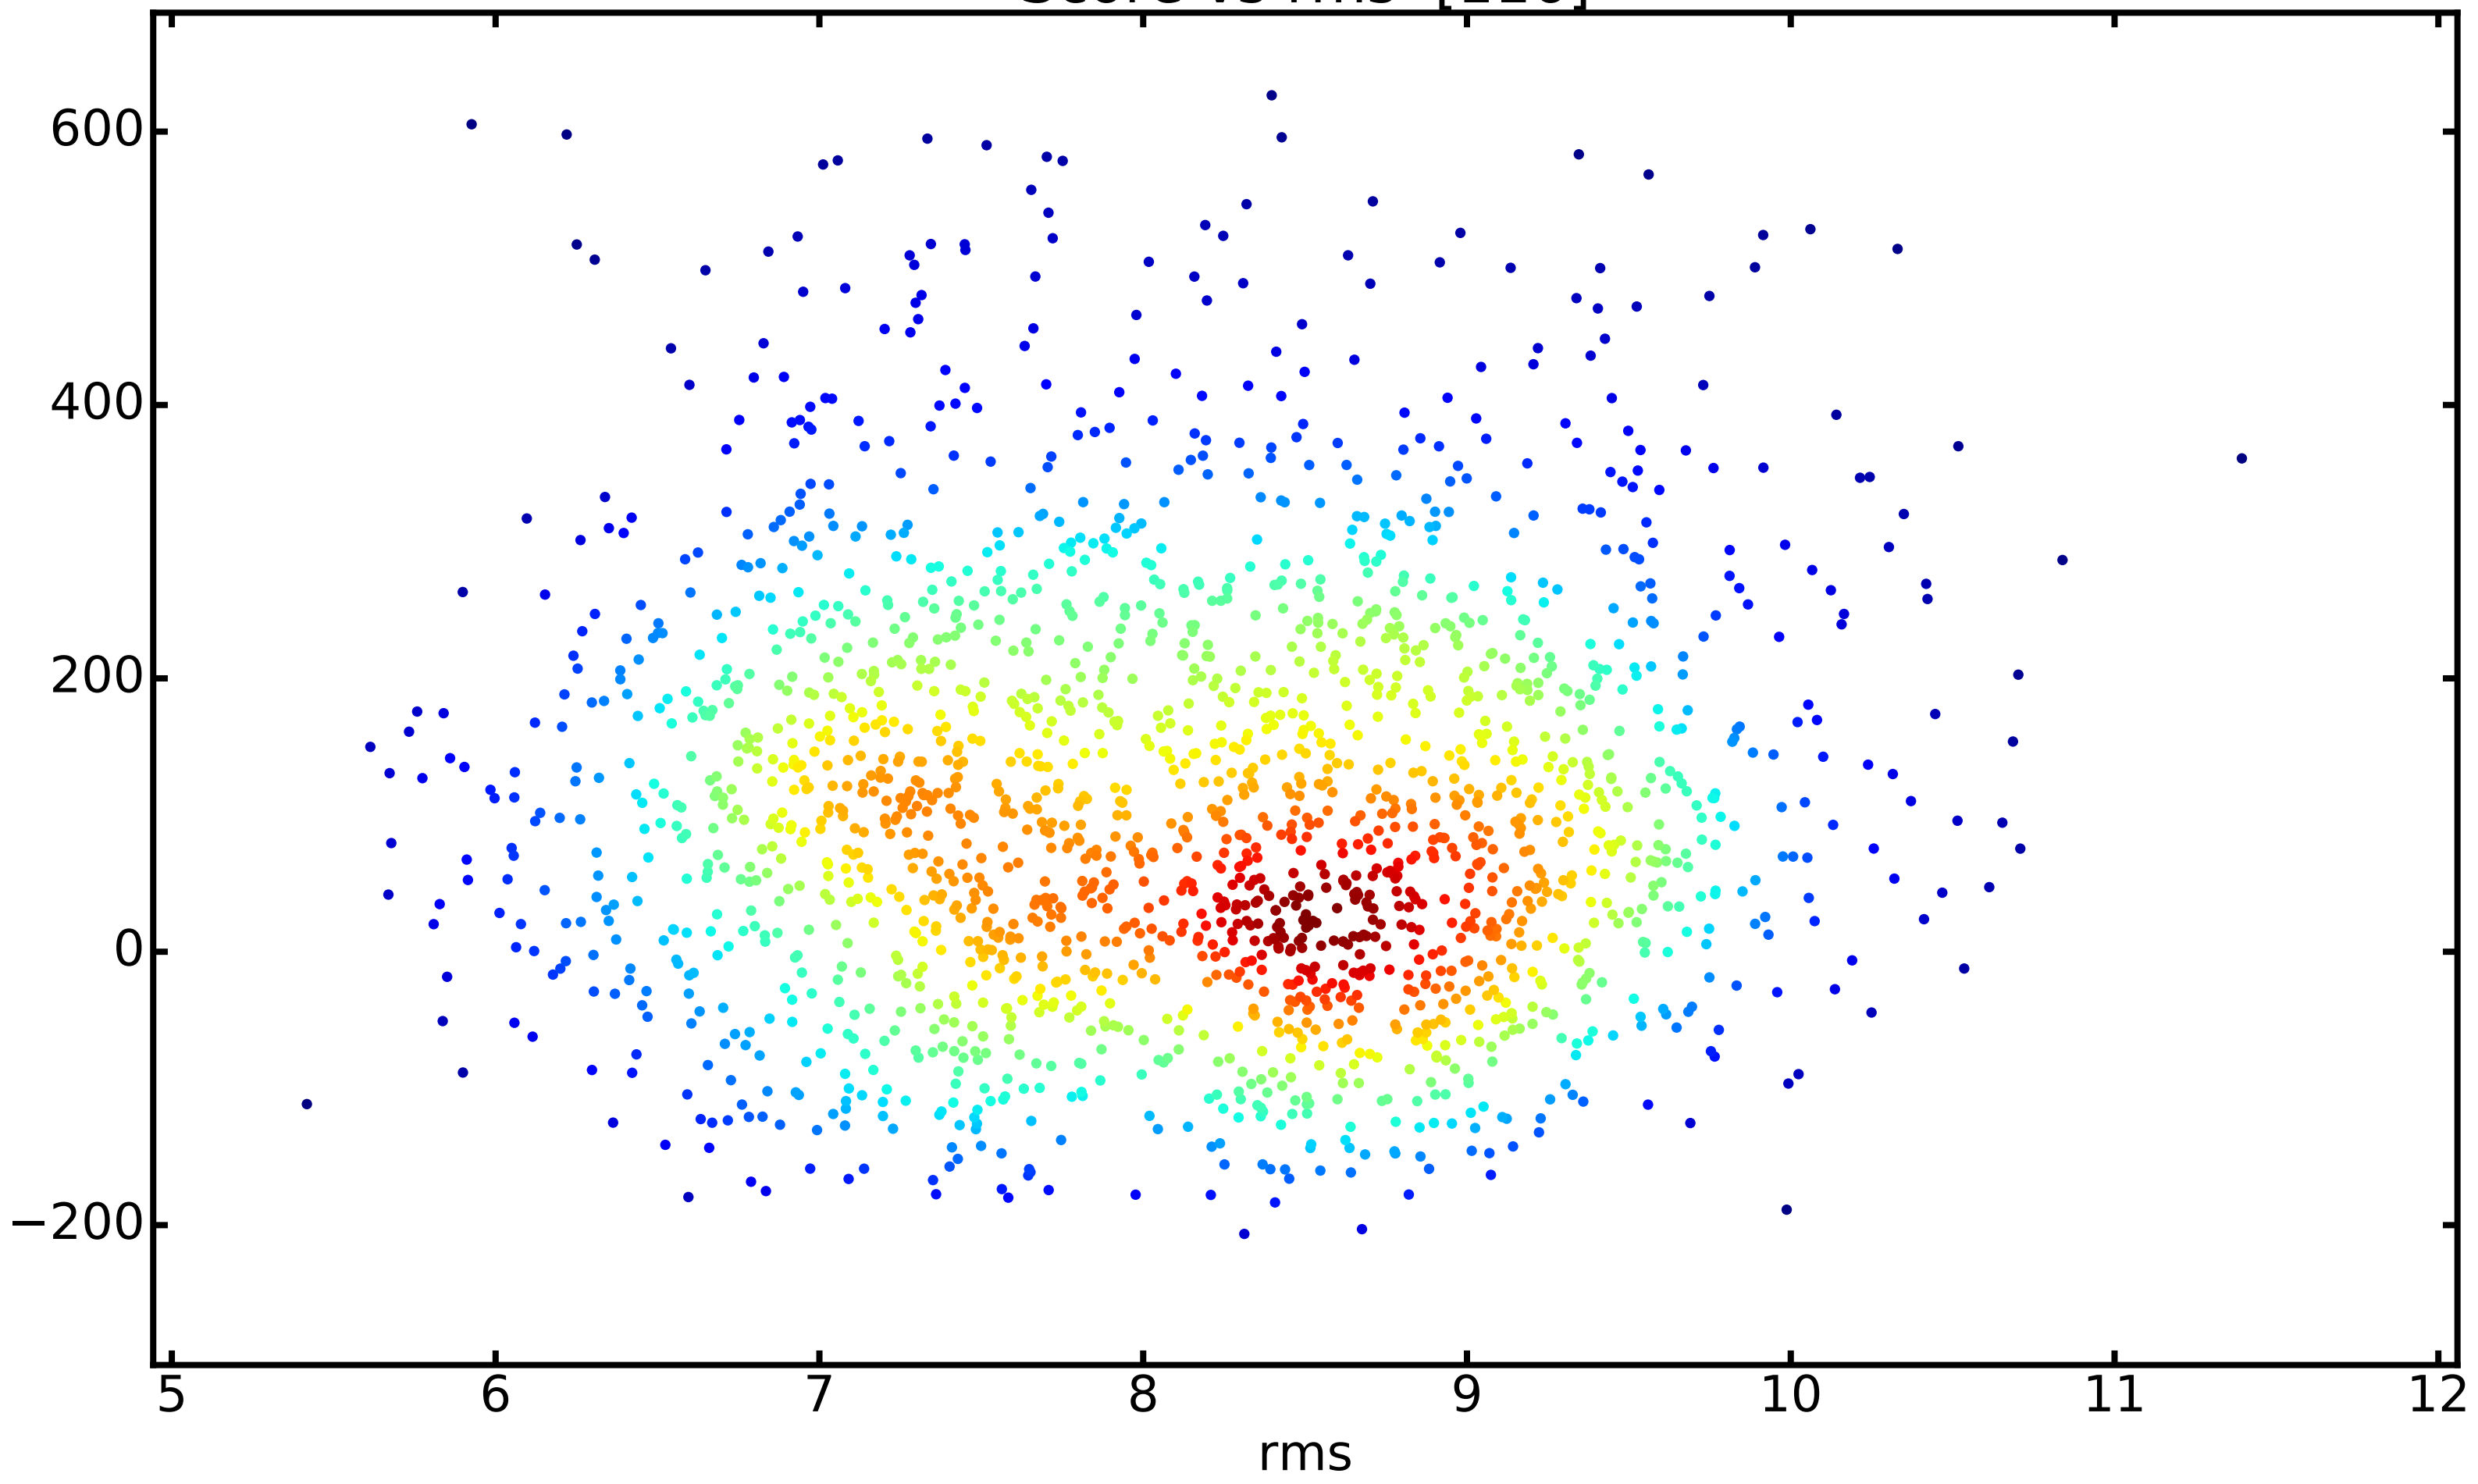

Score vs rms [134]

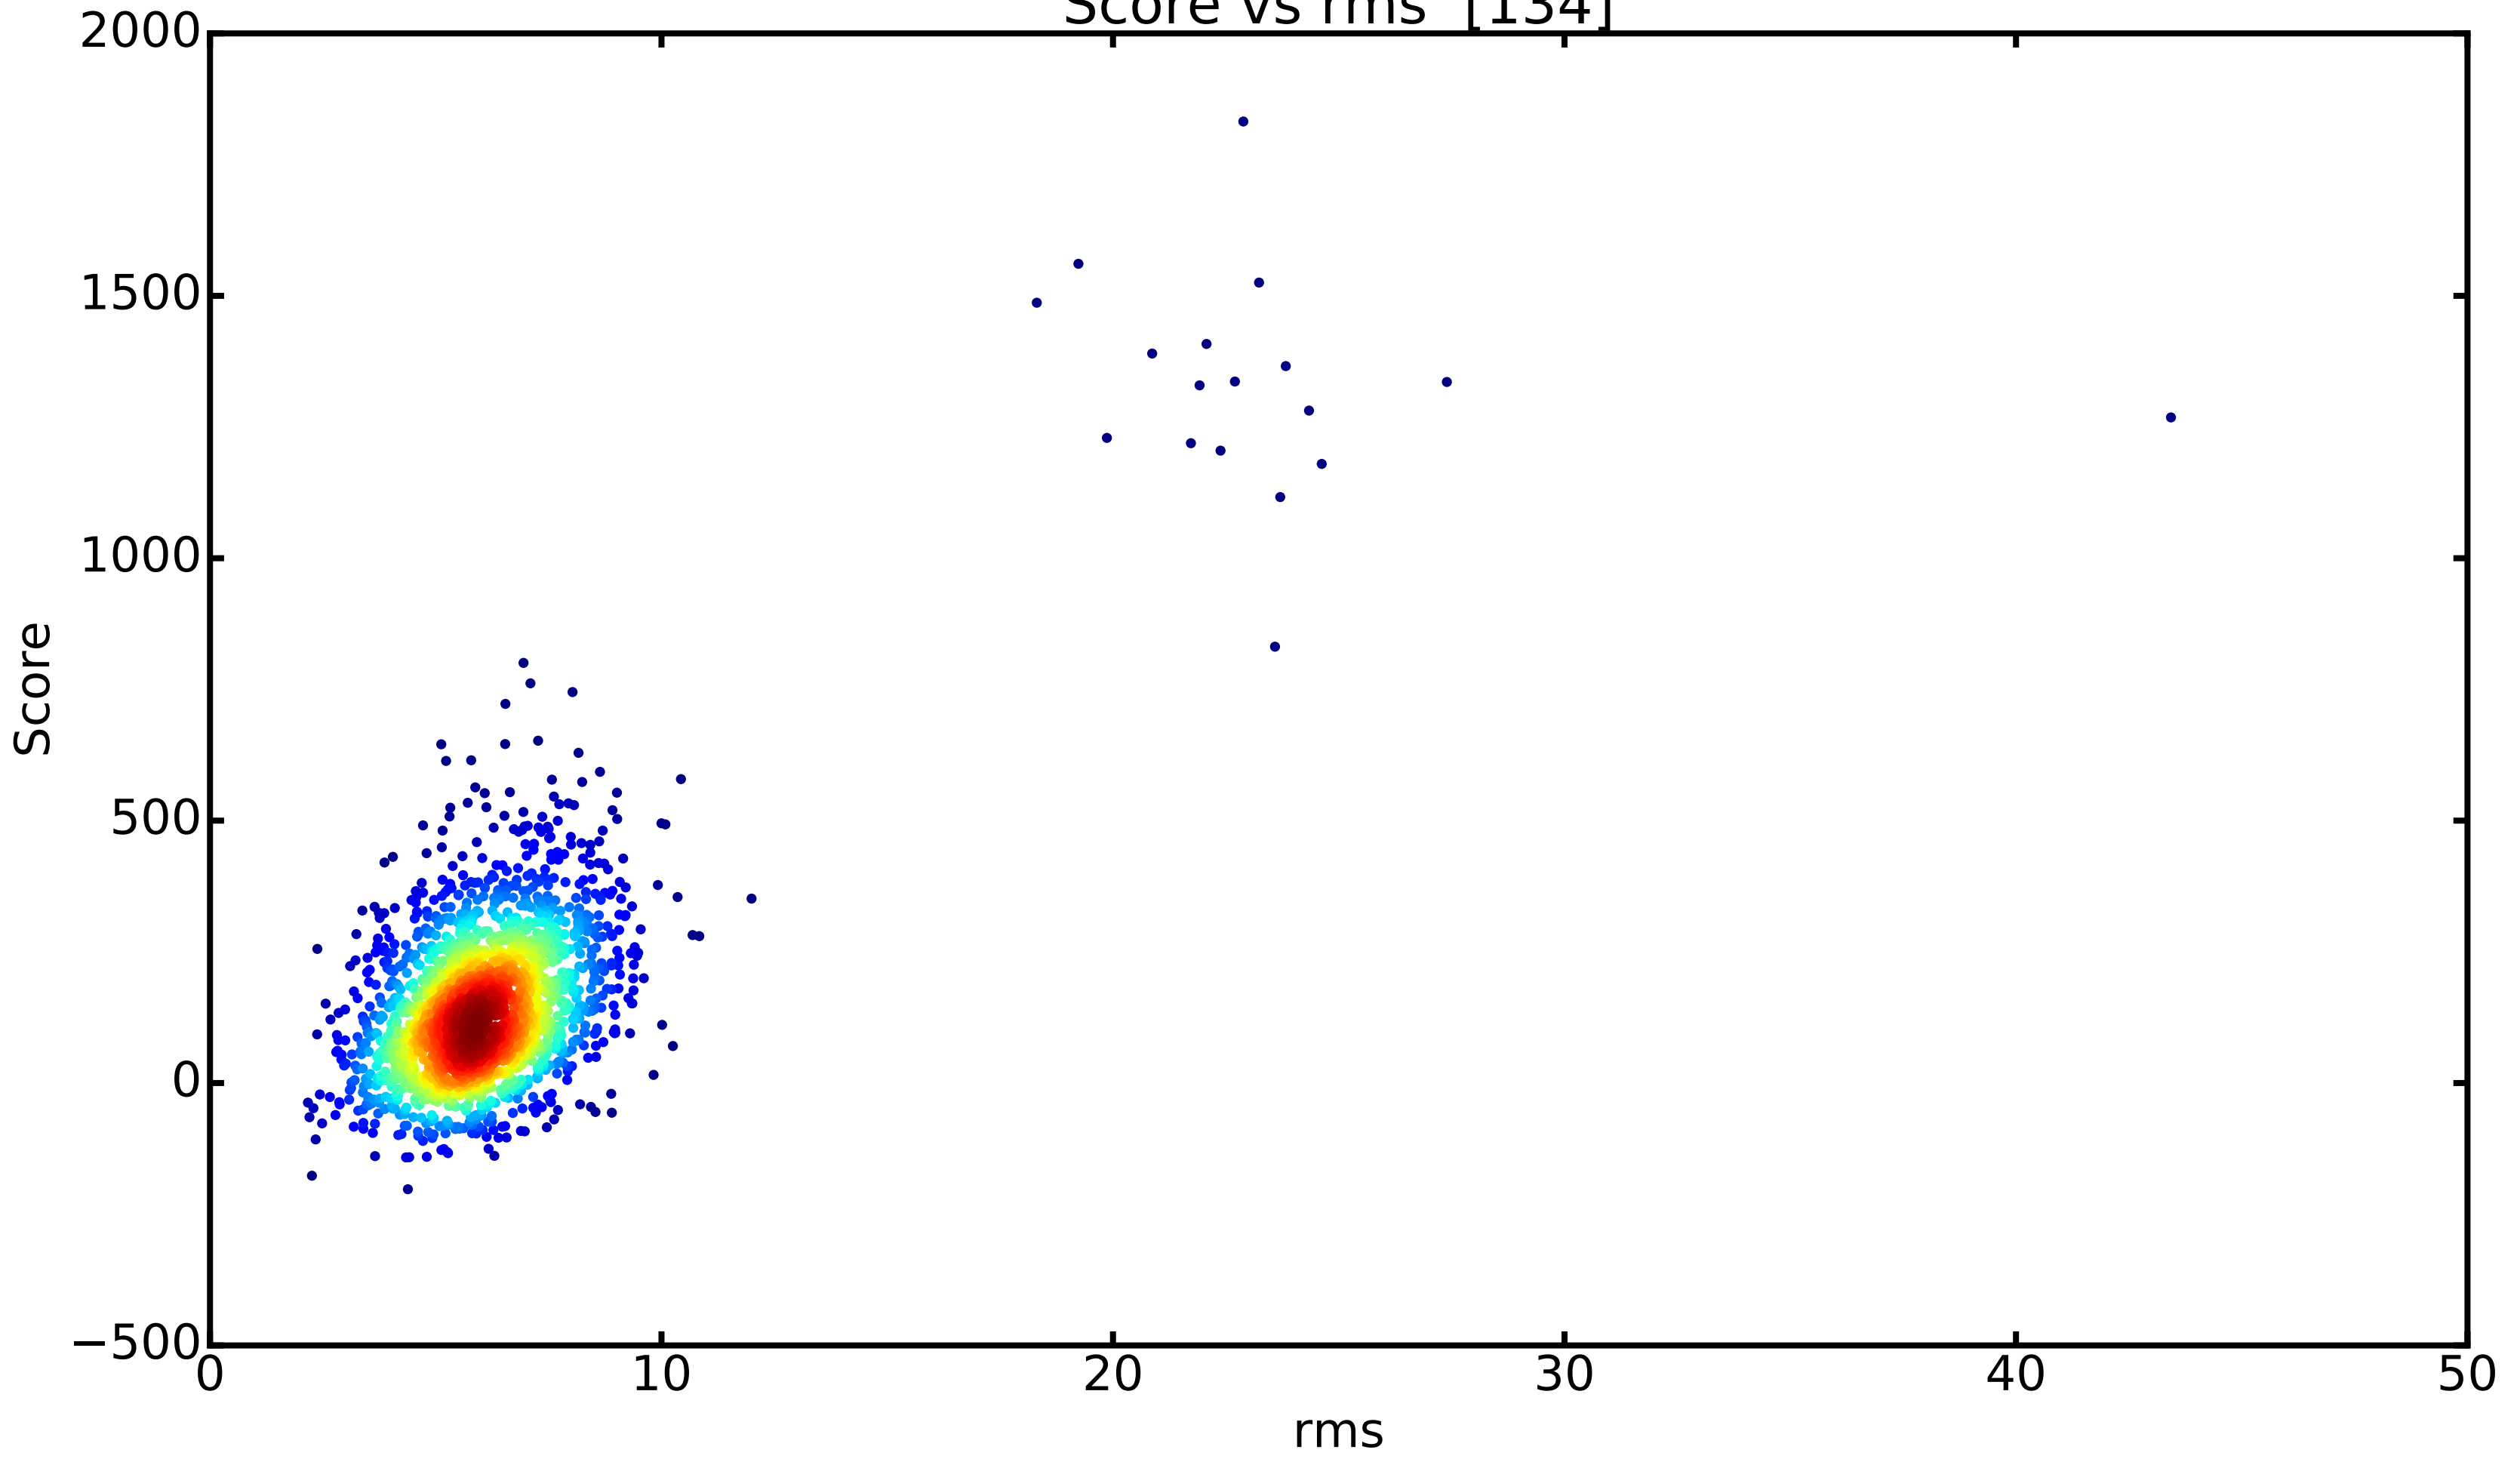

Score vs rms [134]

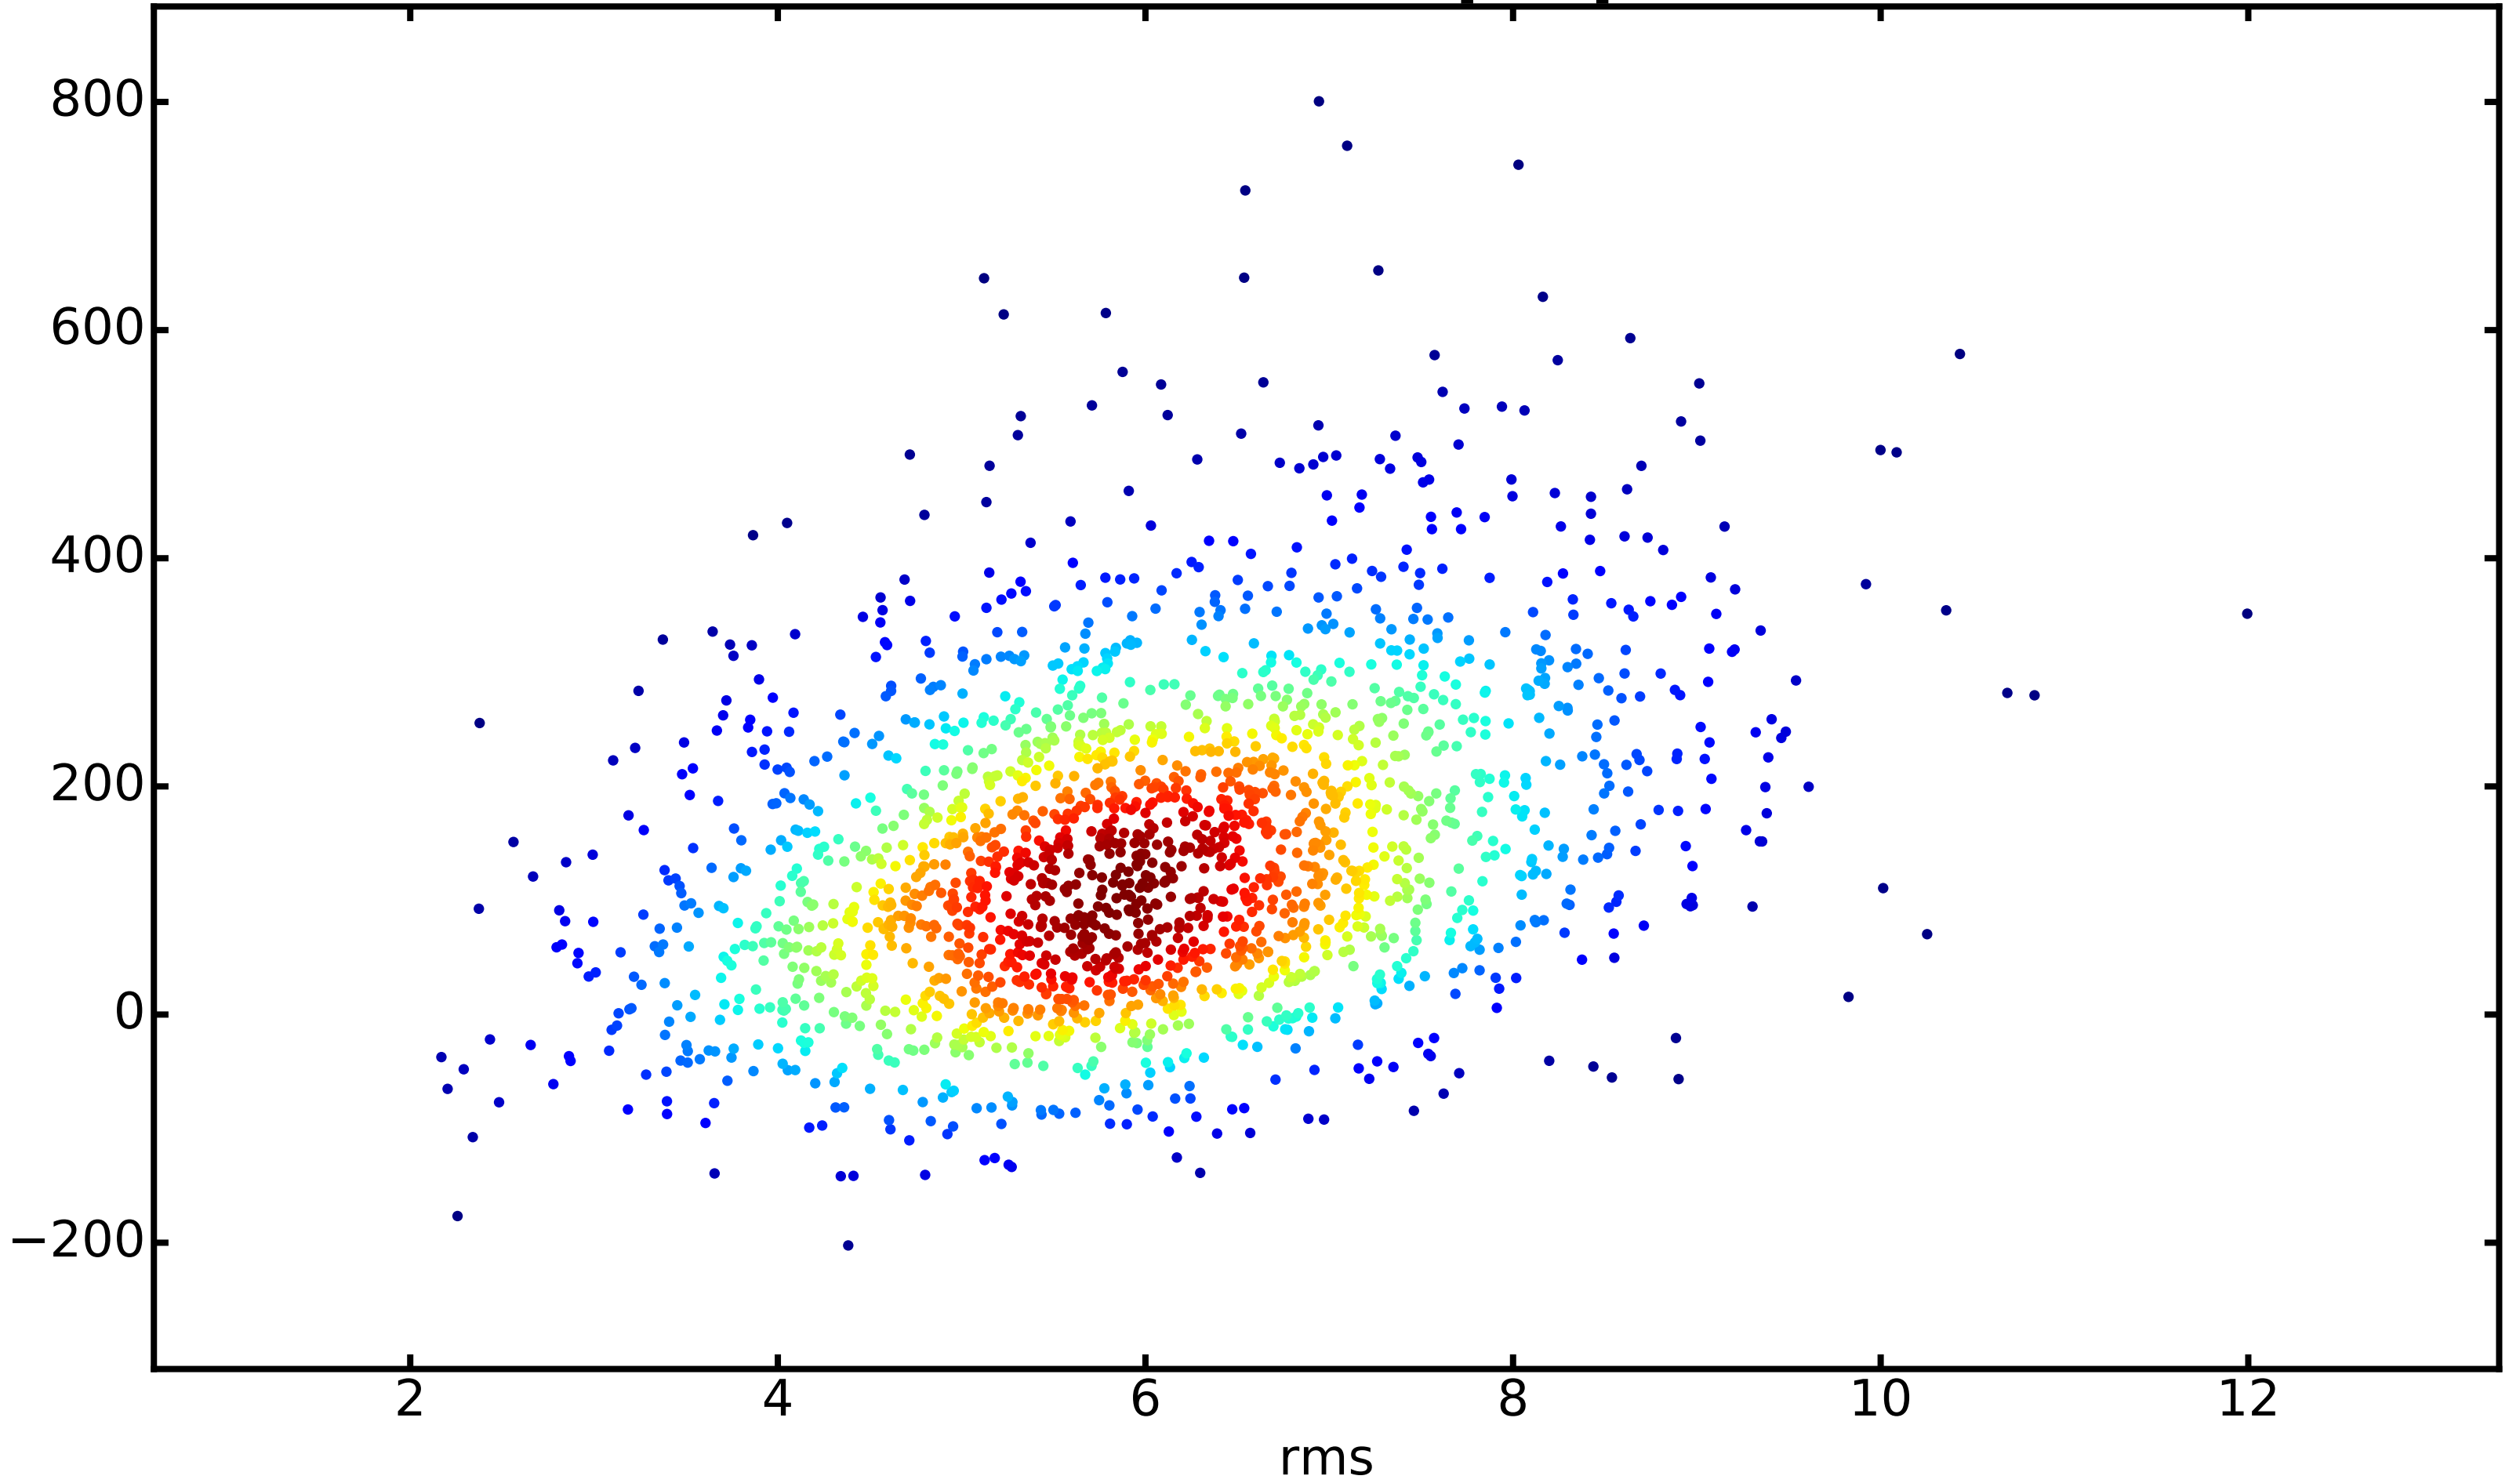

Score vs rms [138]

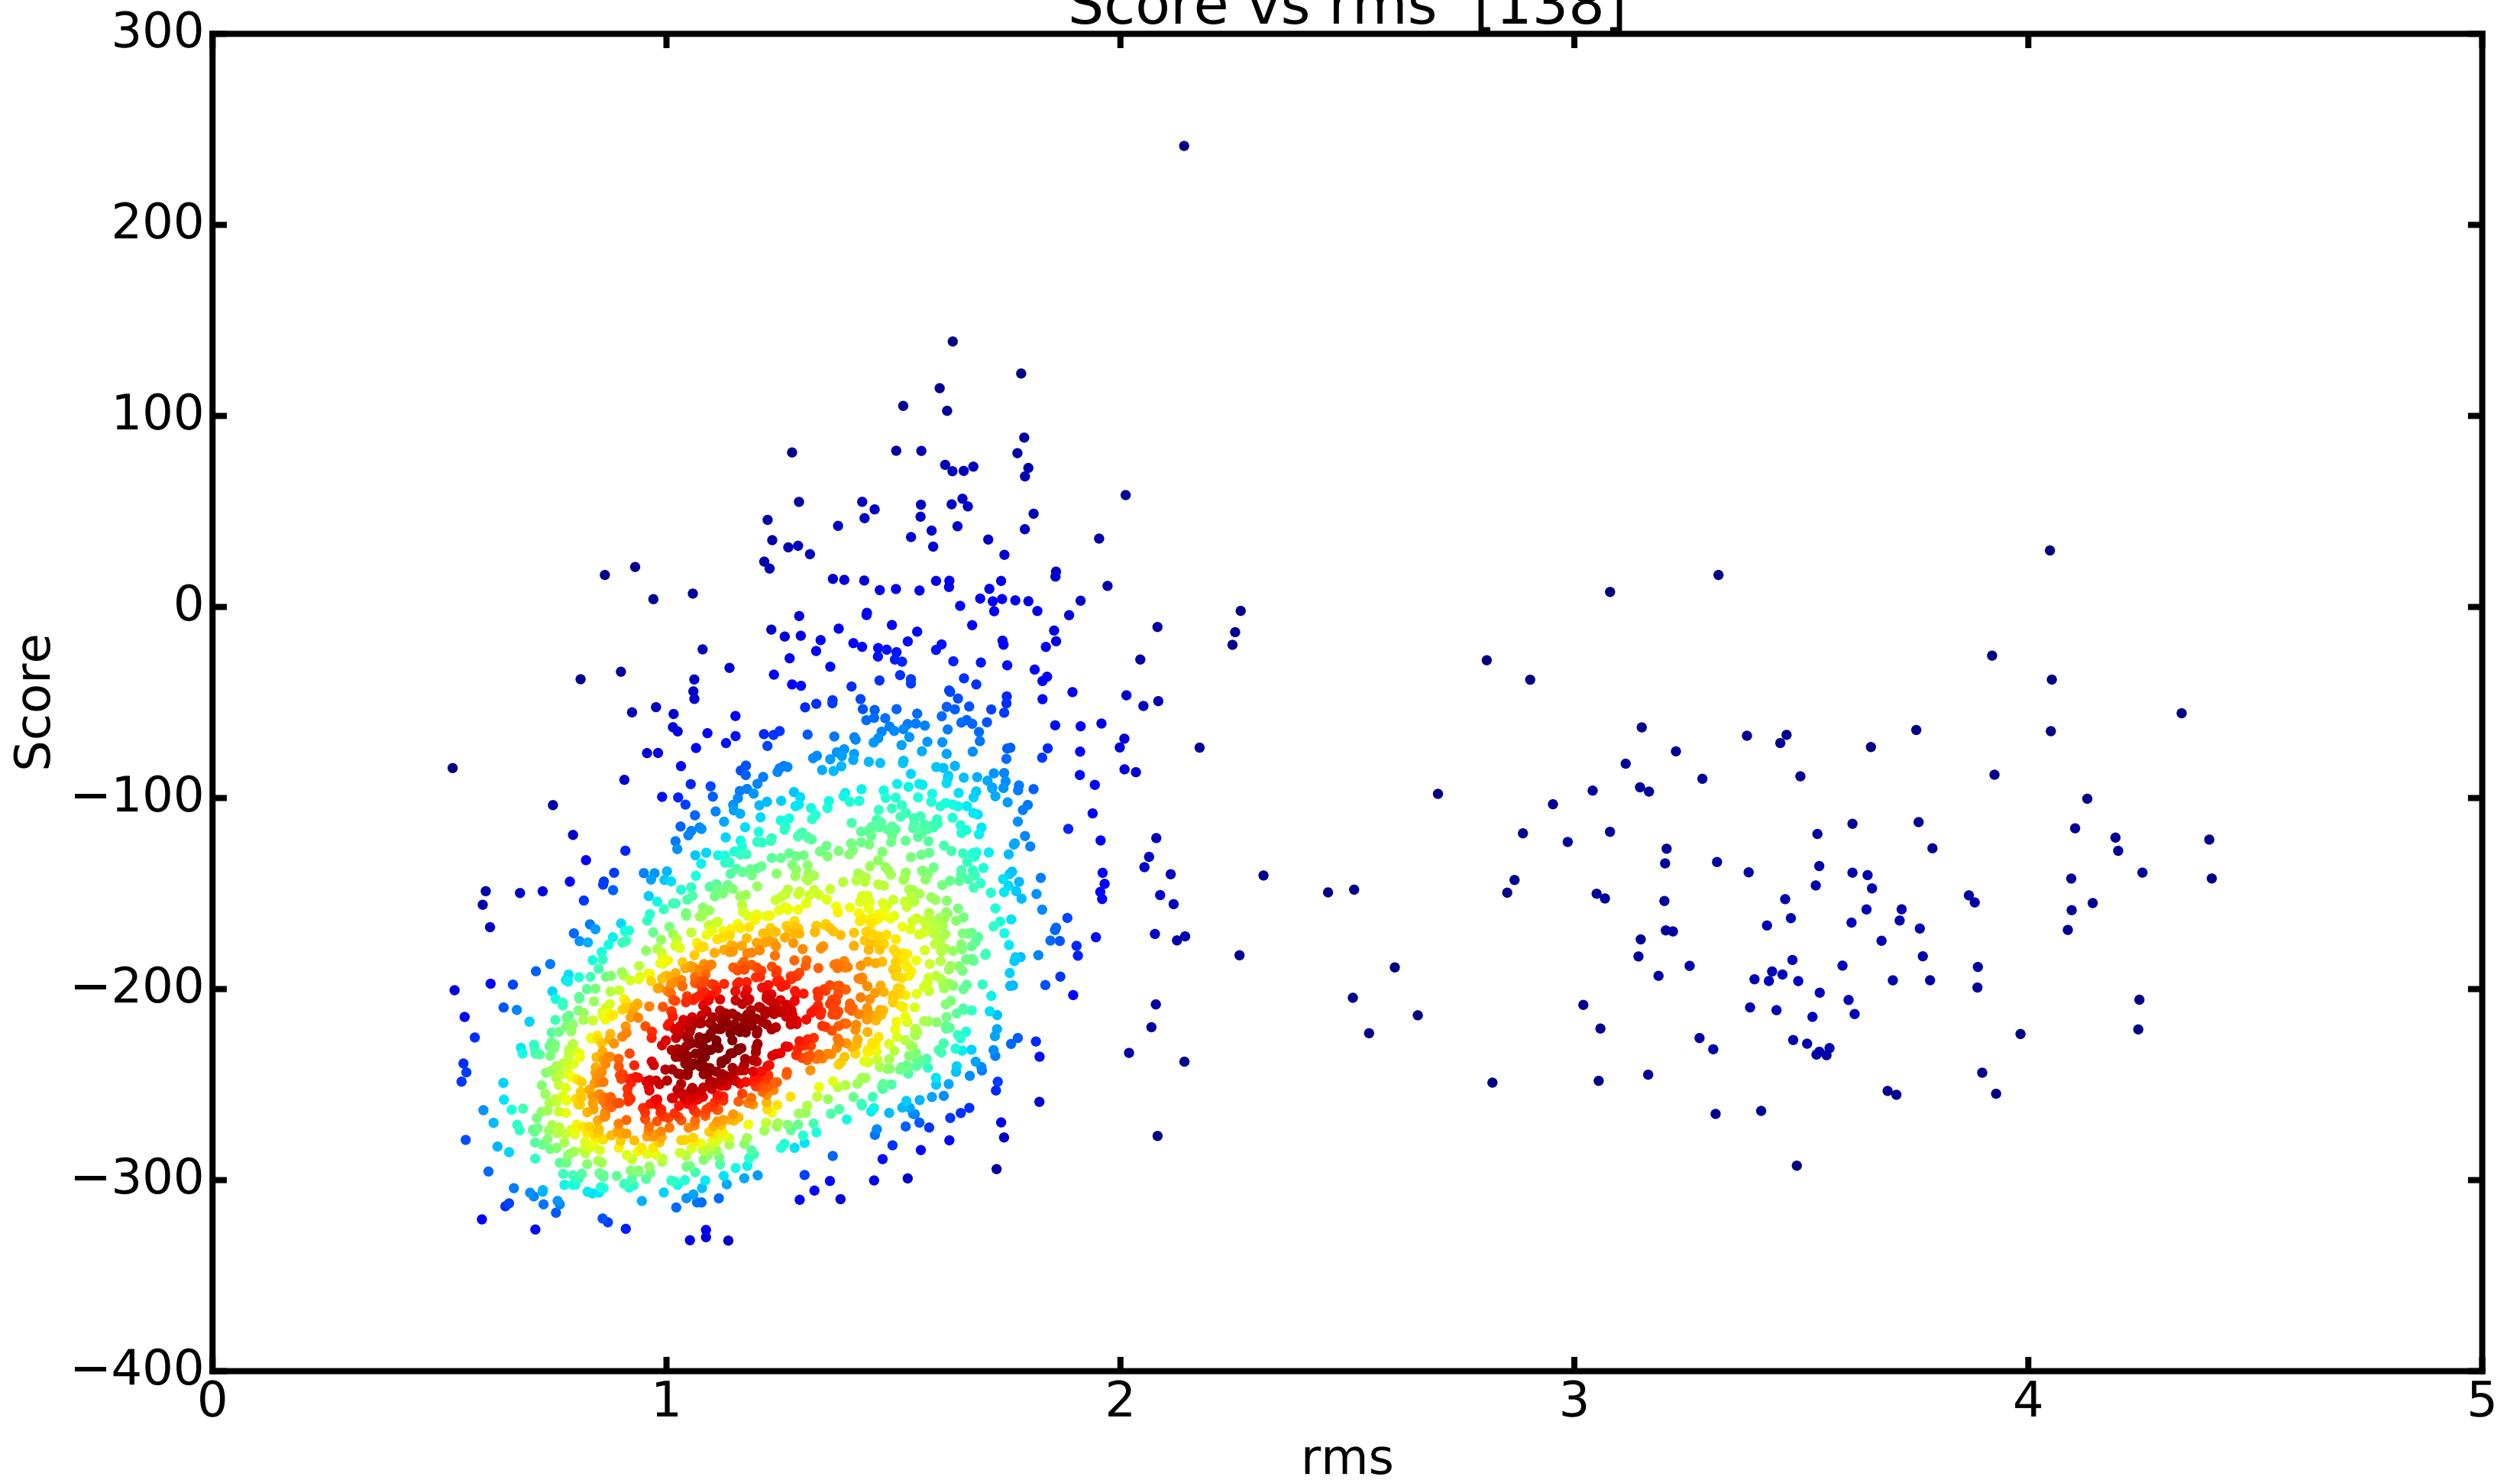



Score vs rms [139]

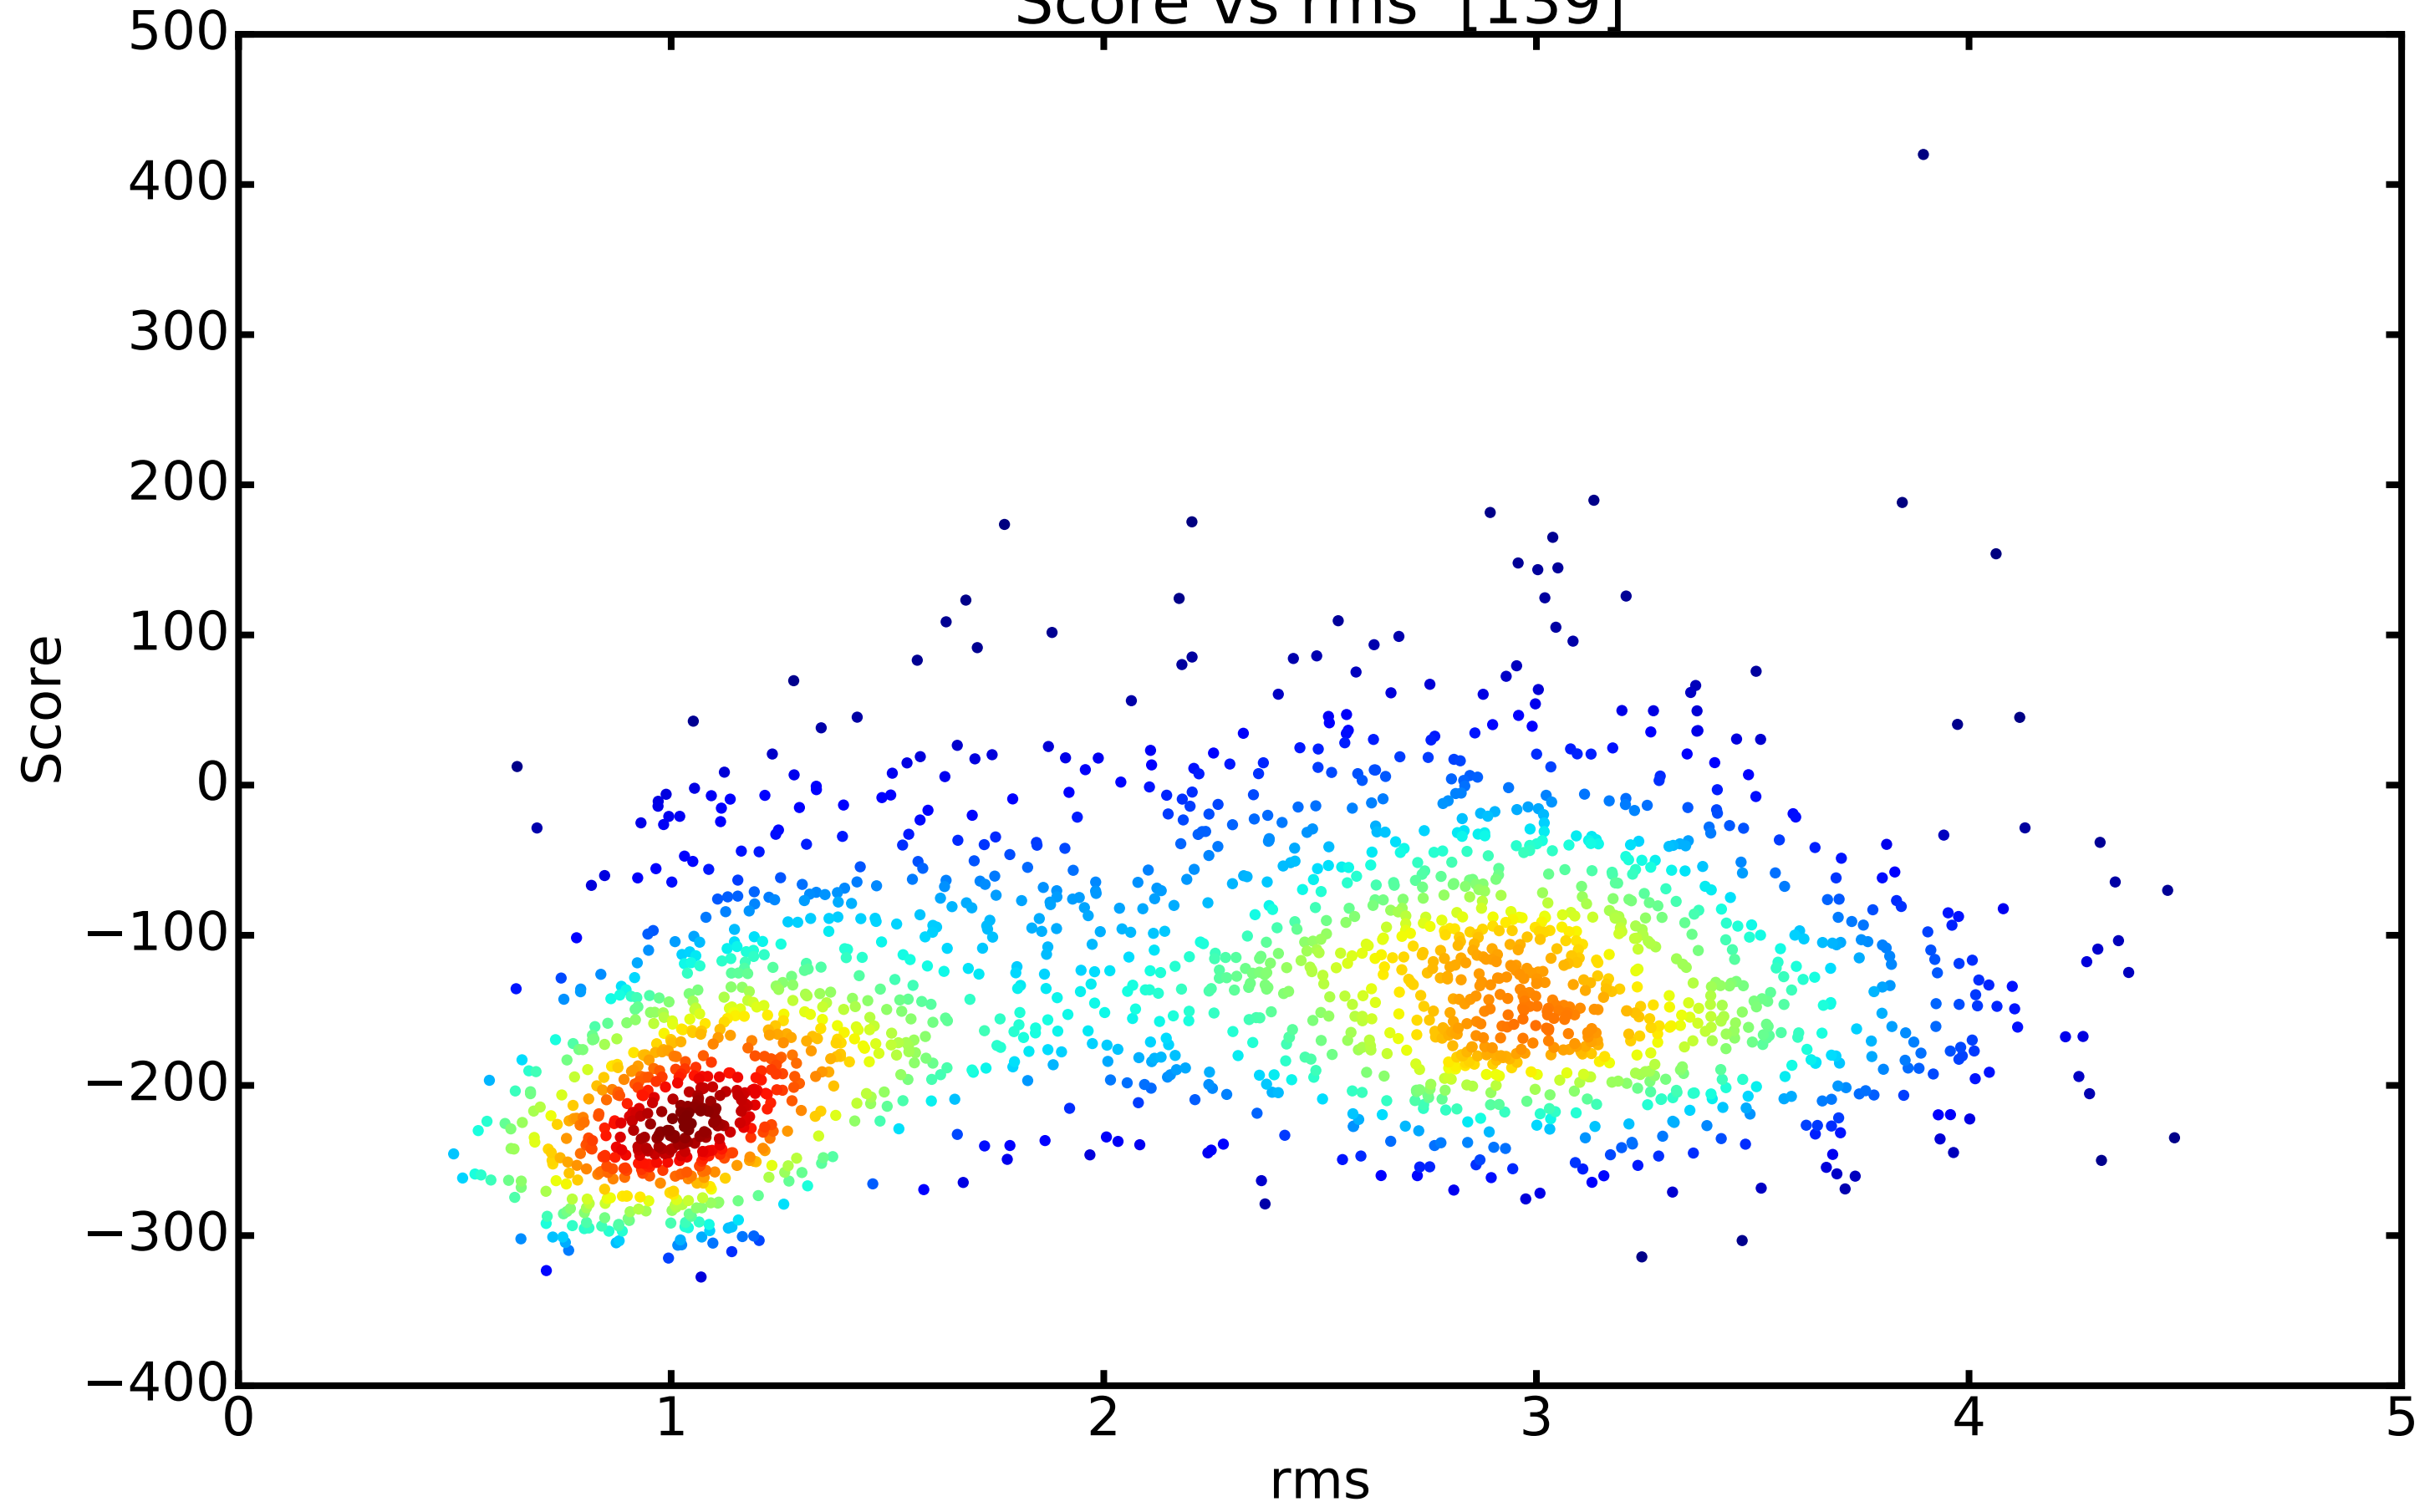

Score vs rms [154]

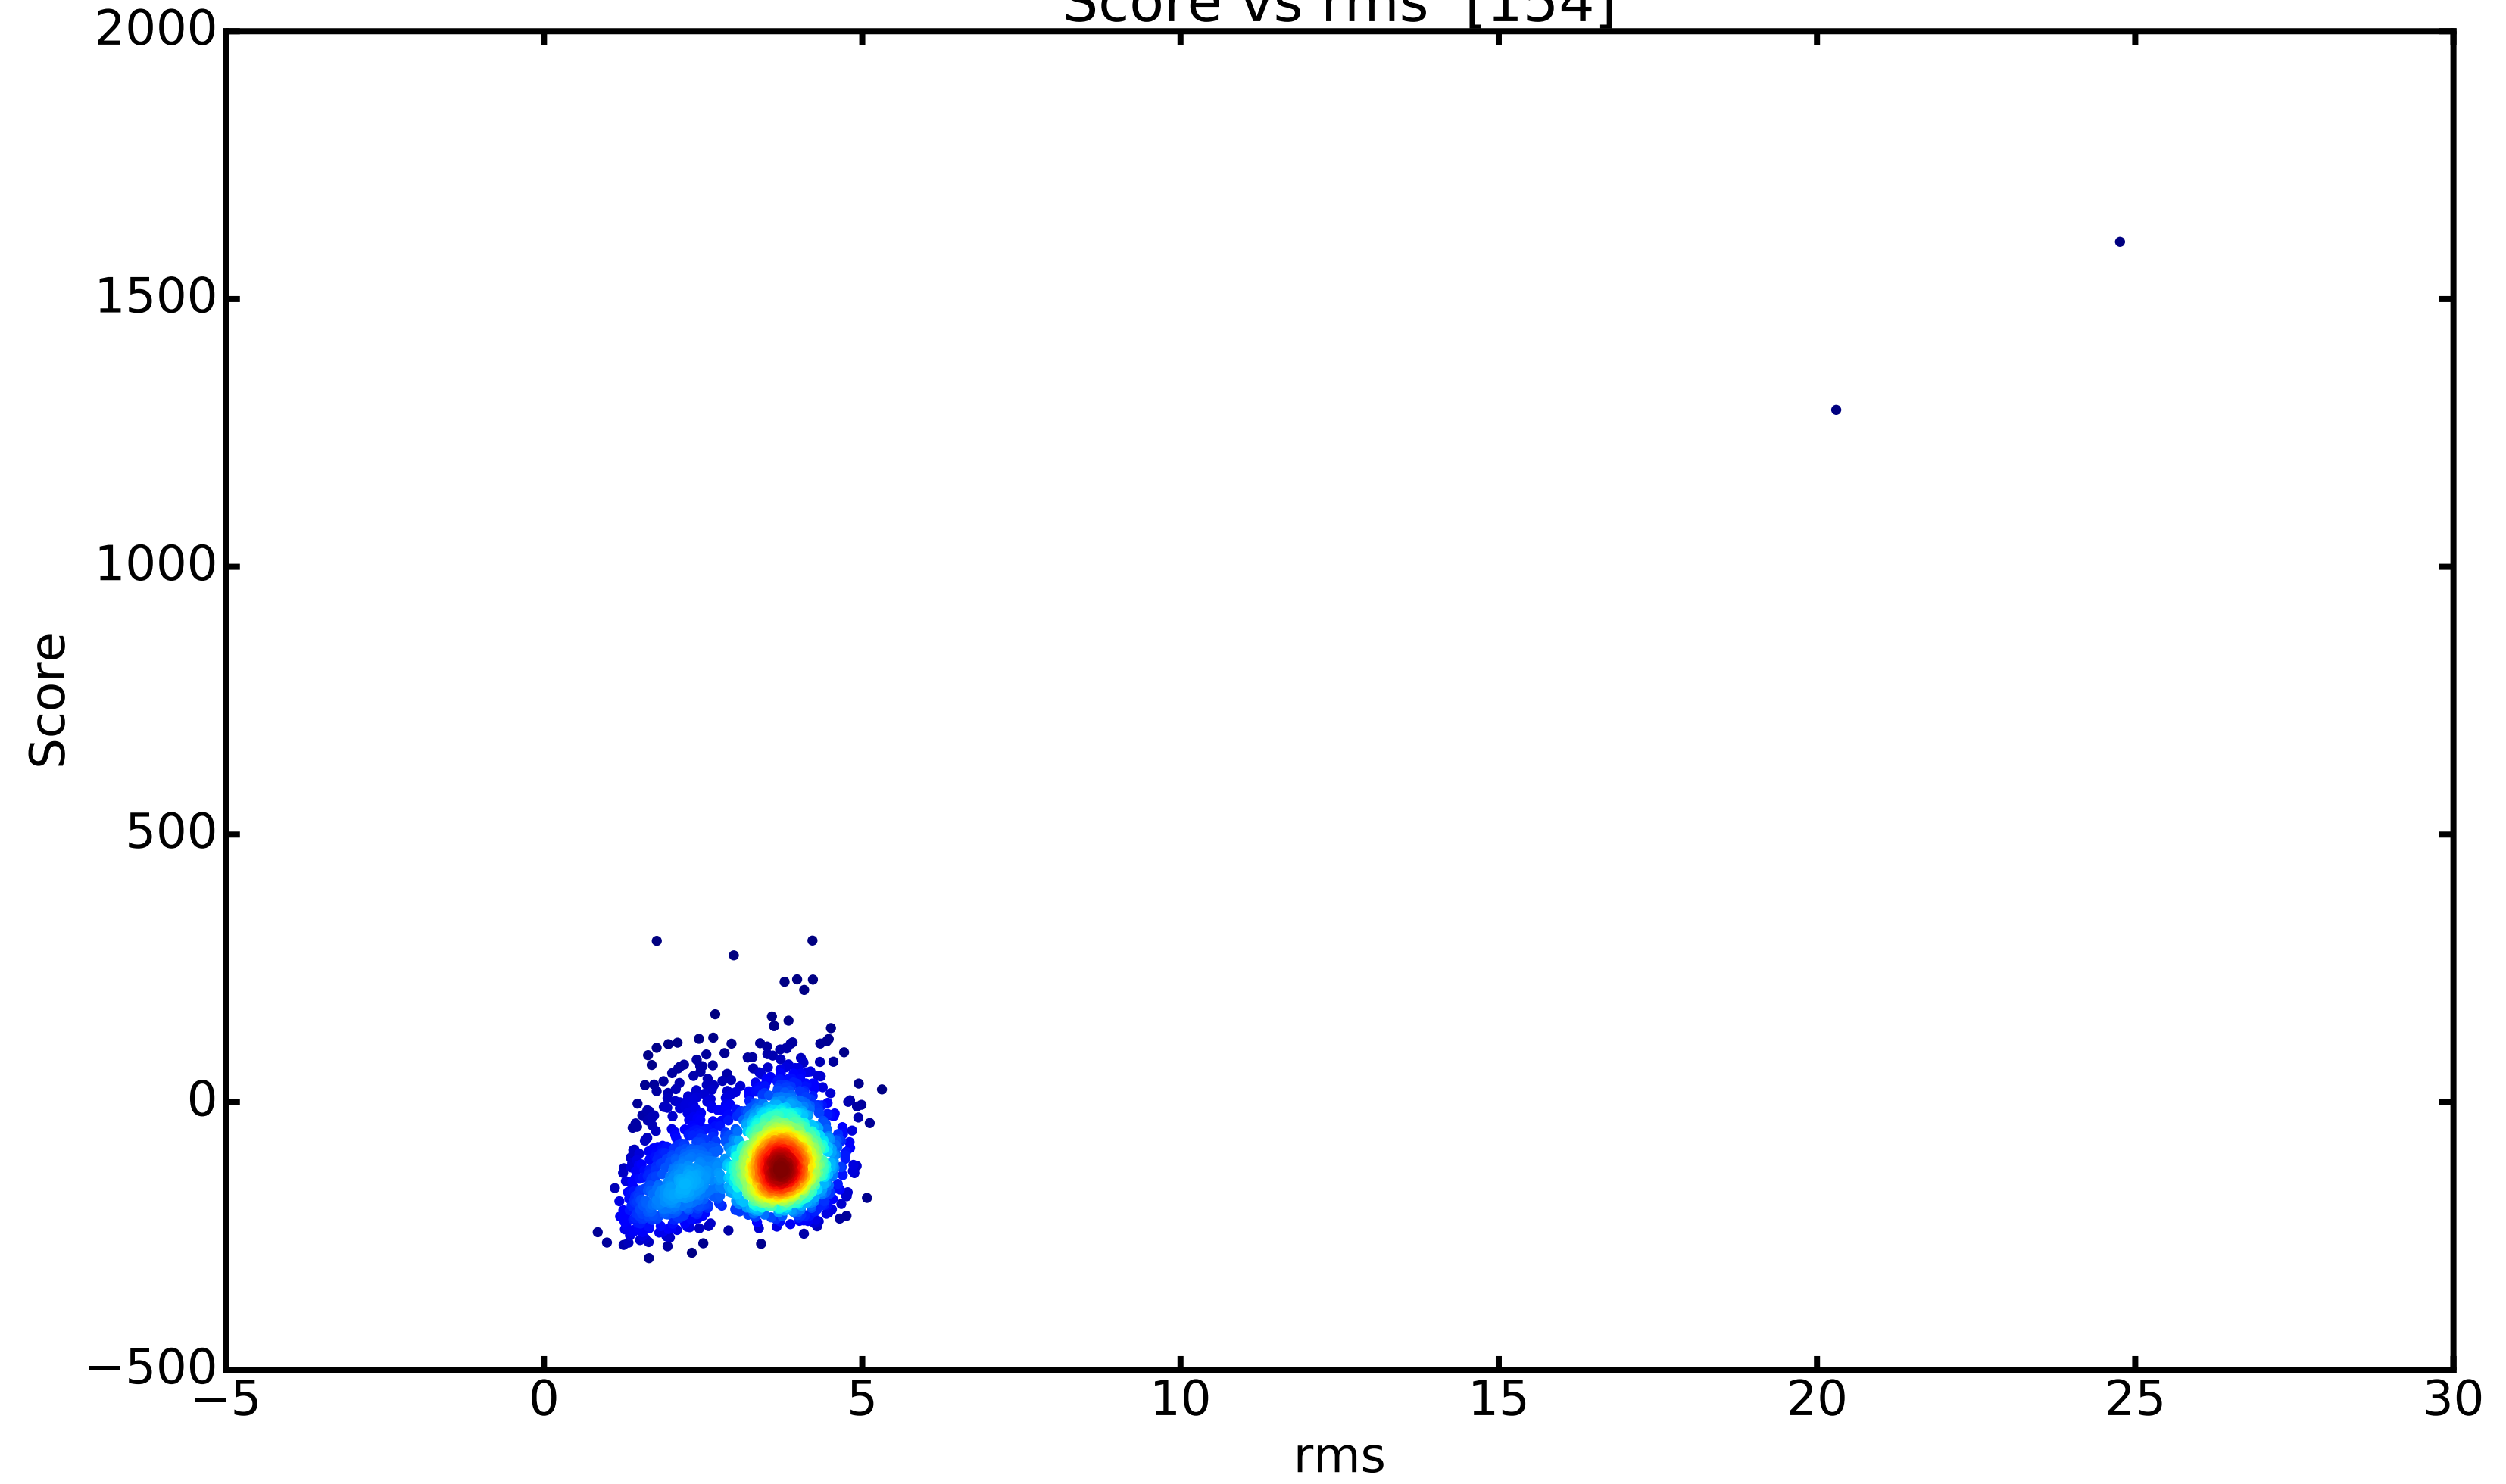

Score vs rms [154]

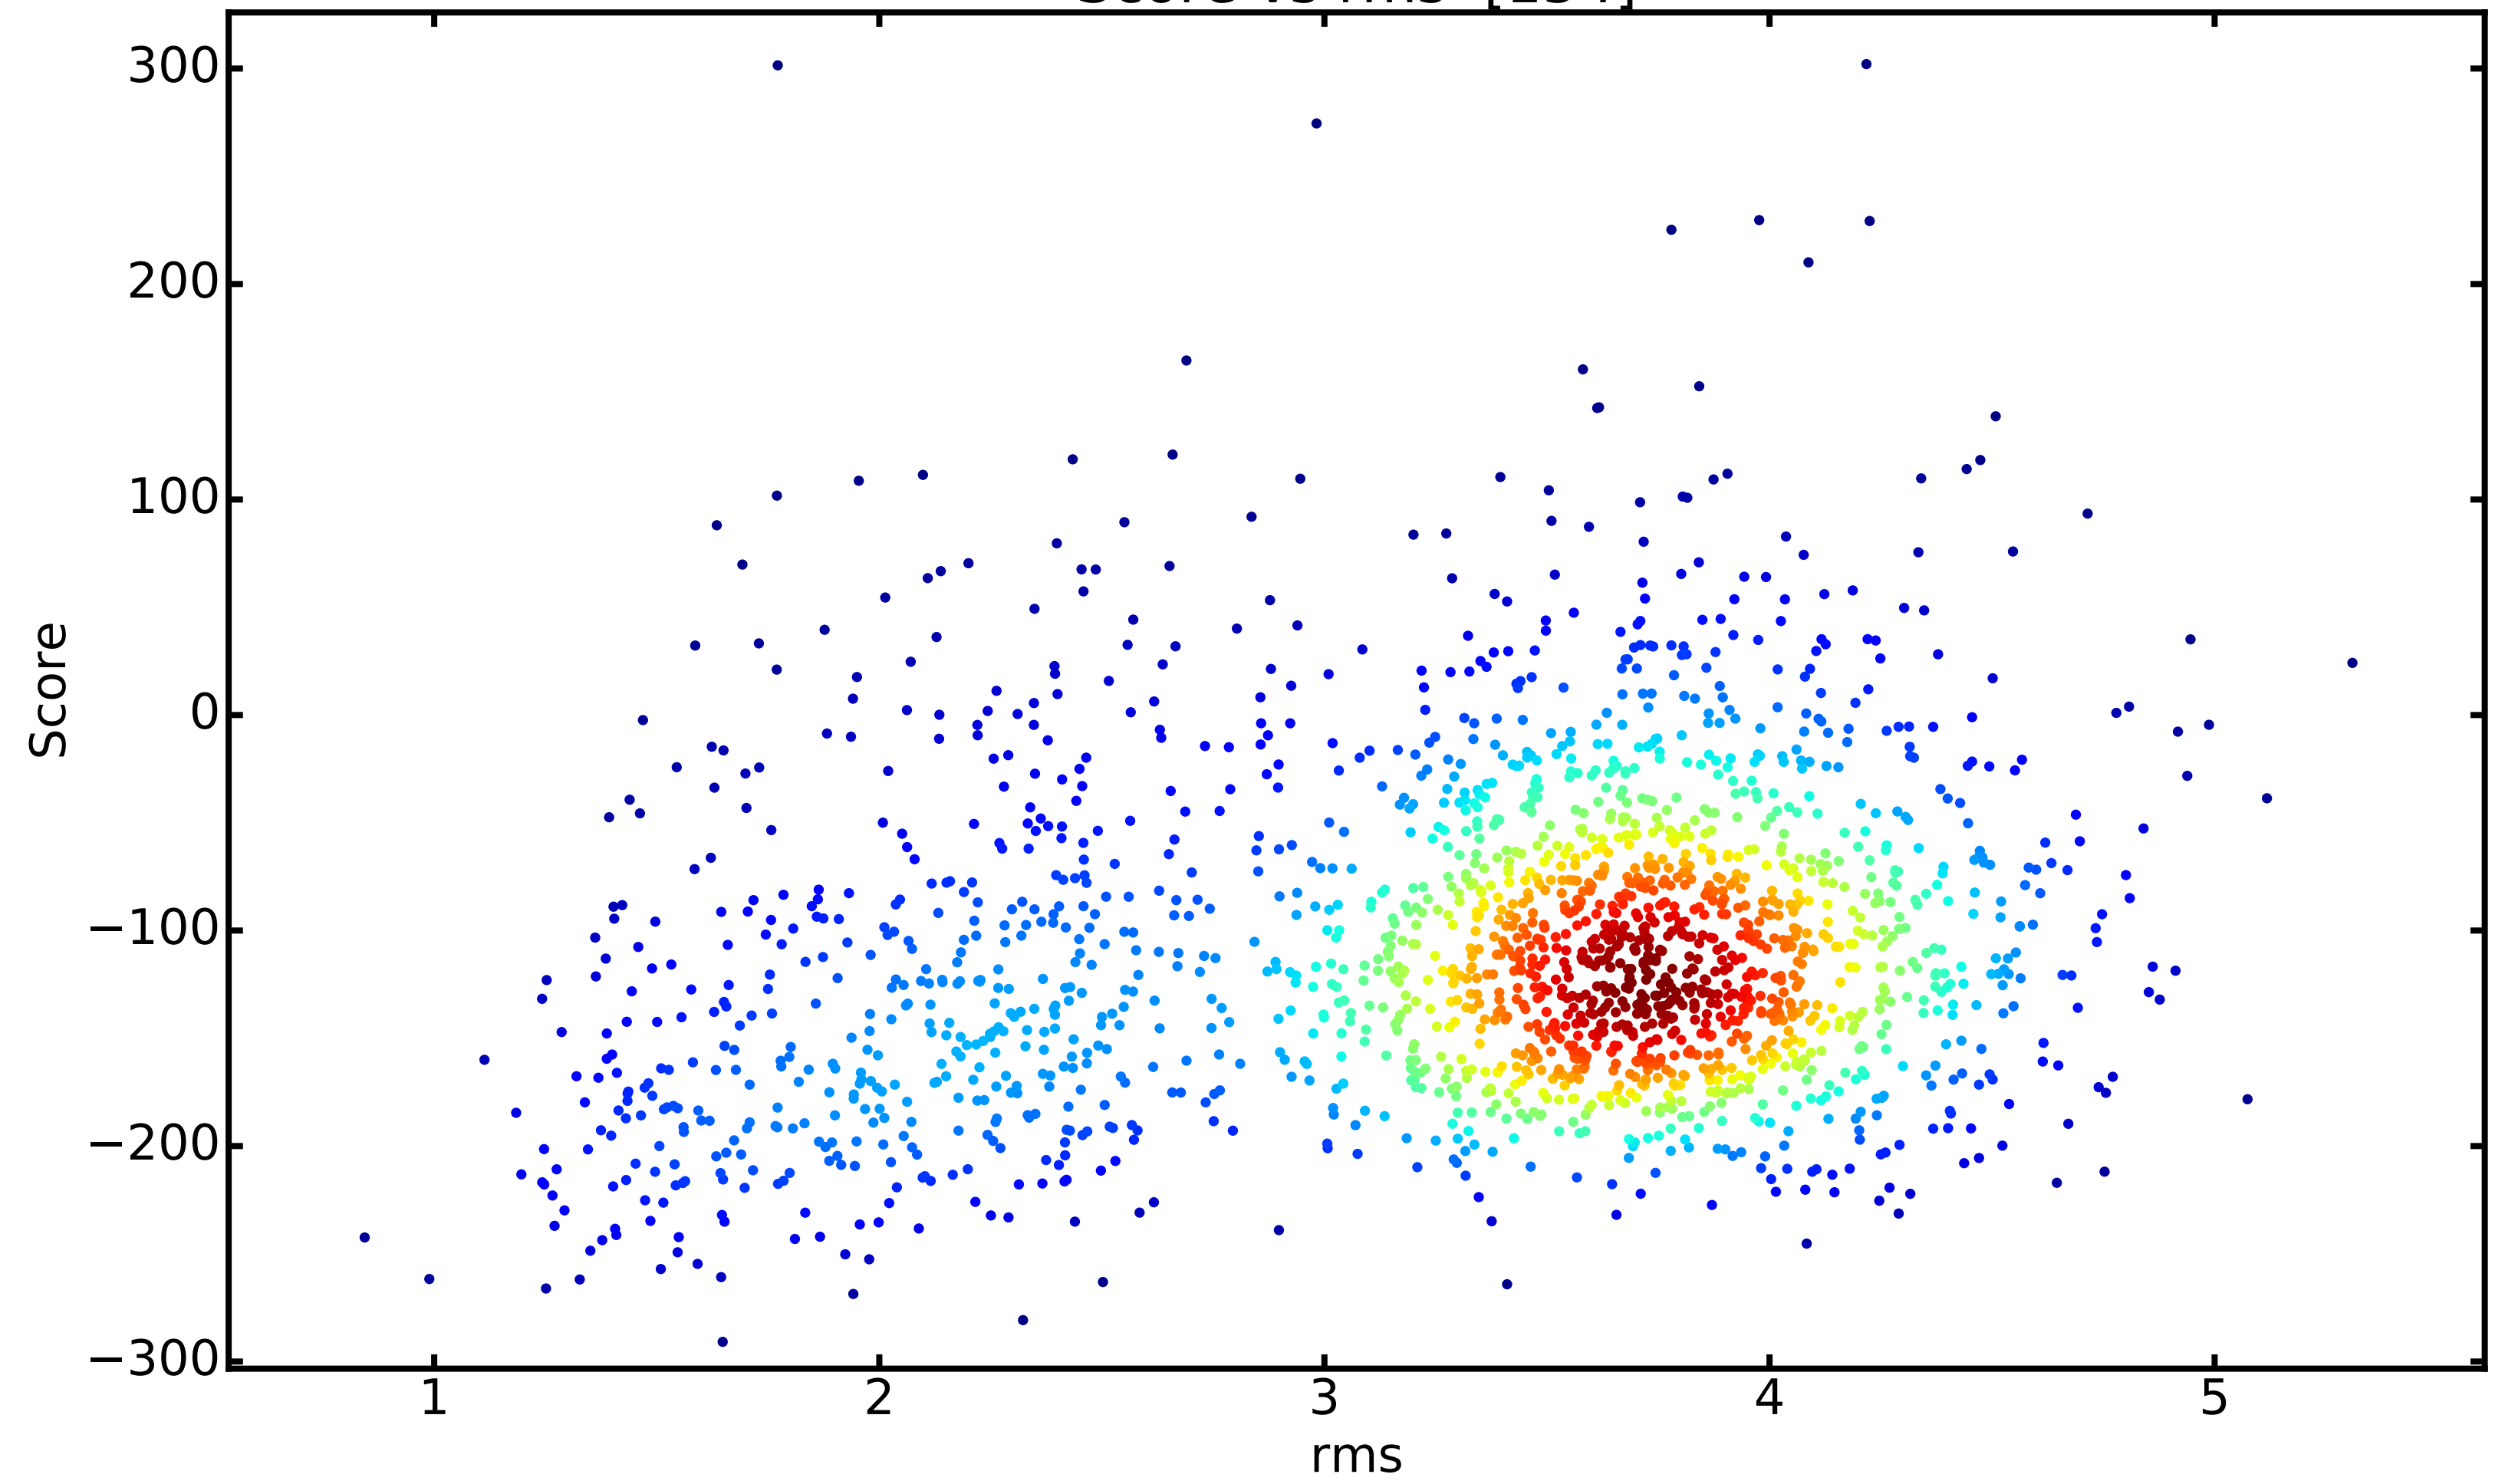

Score vs rms [157]

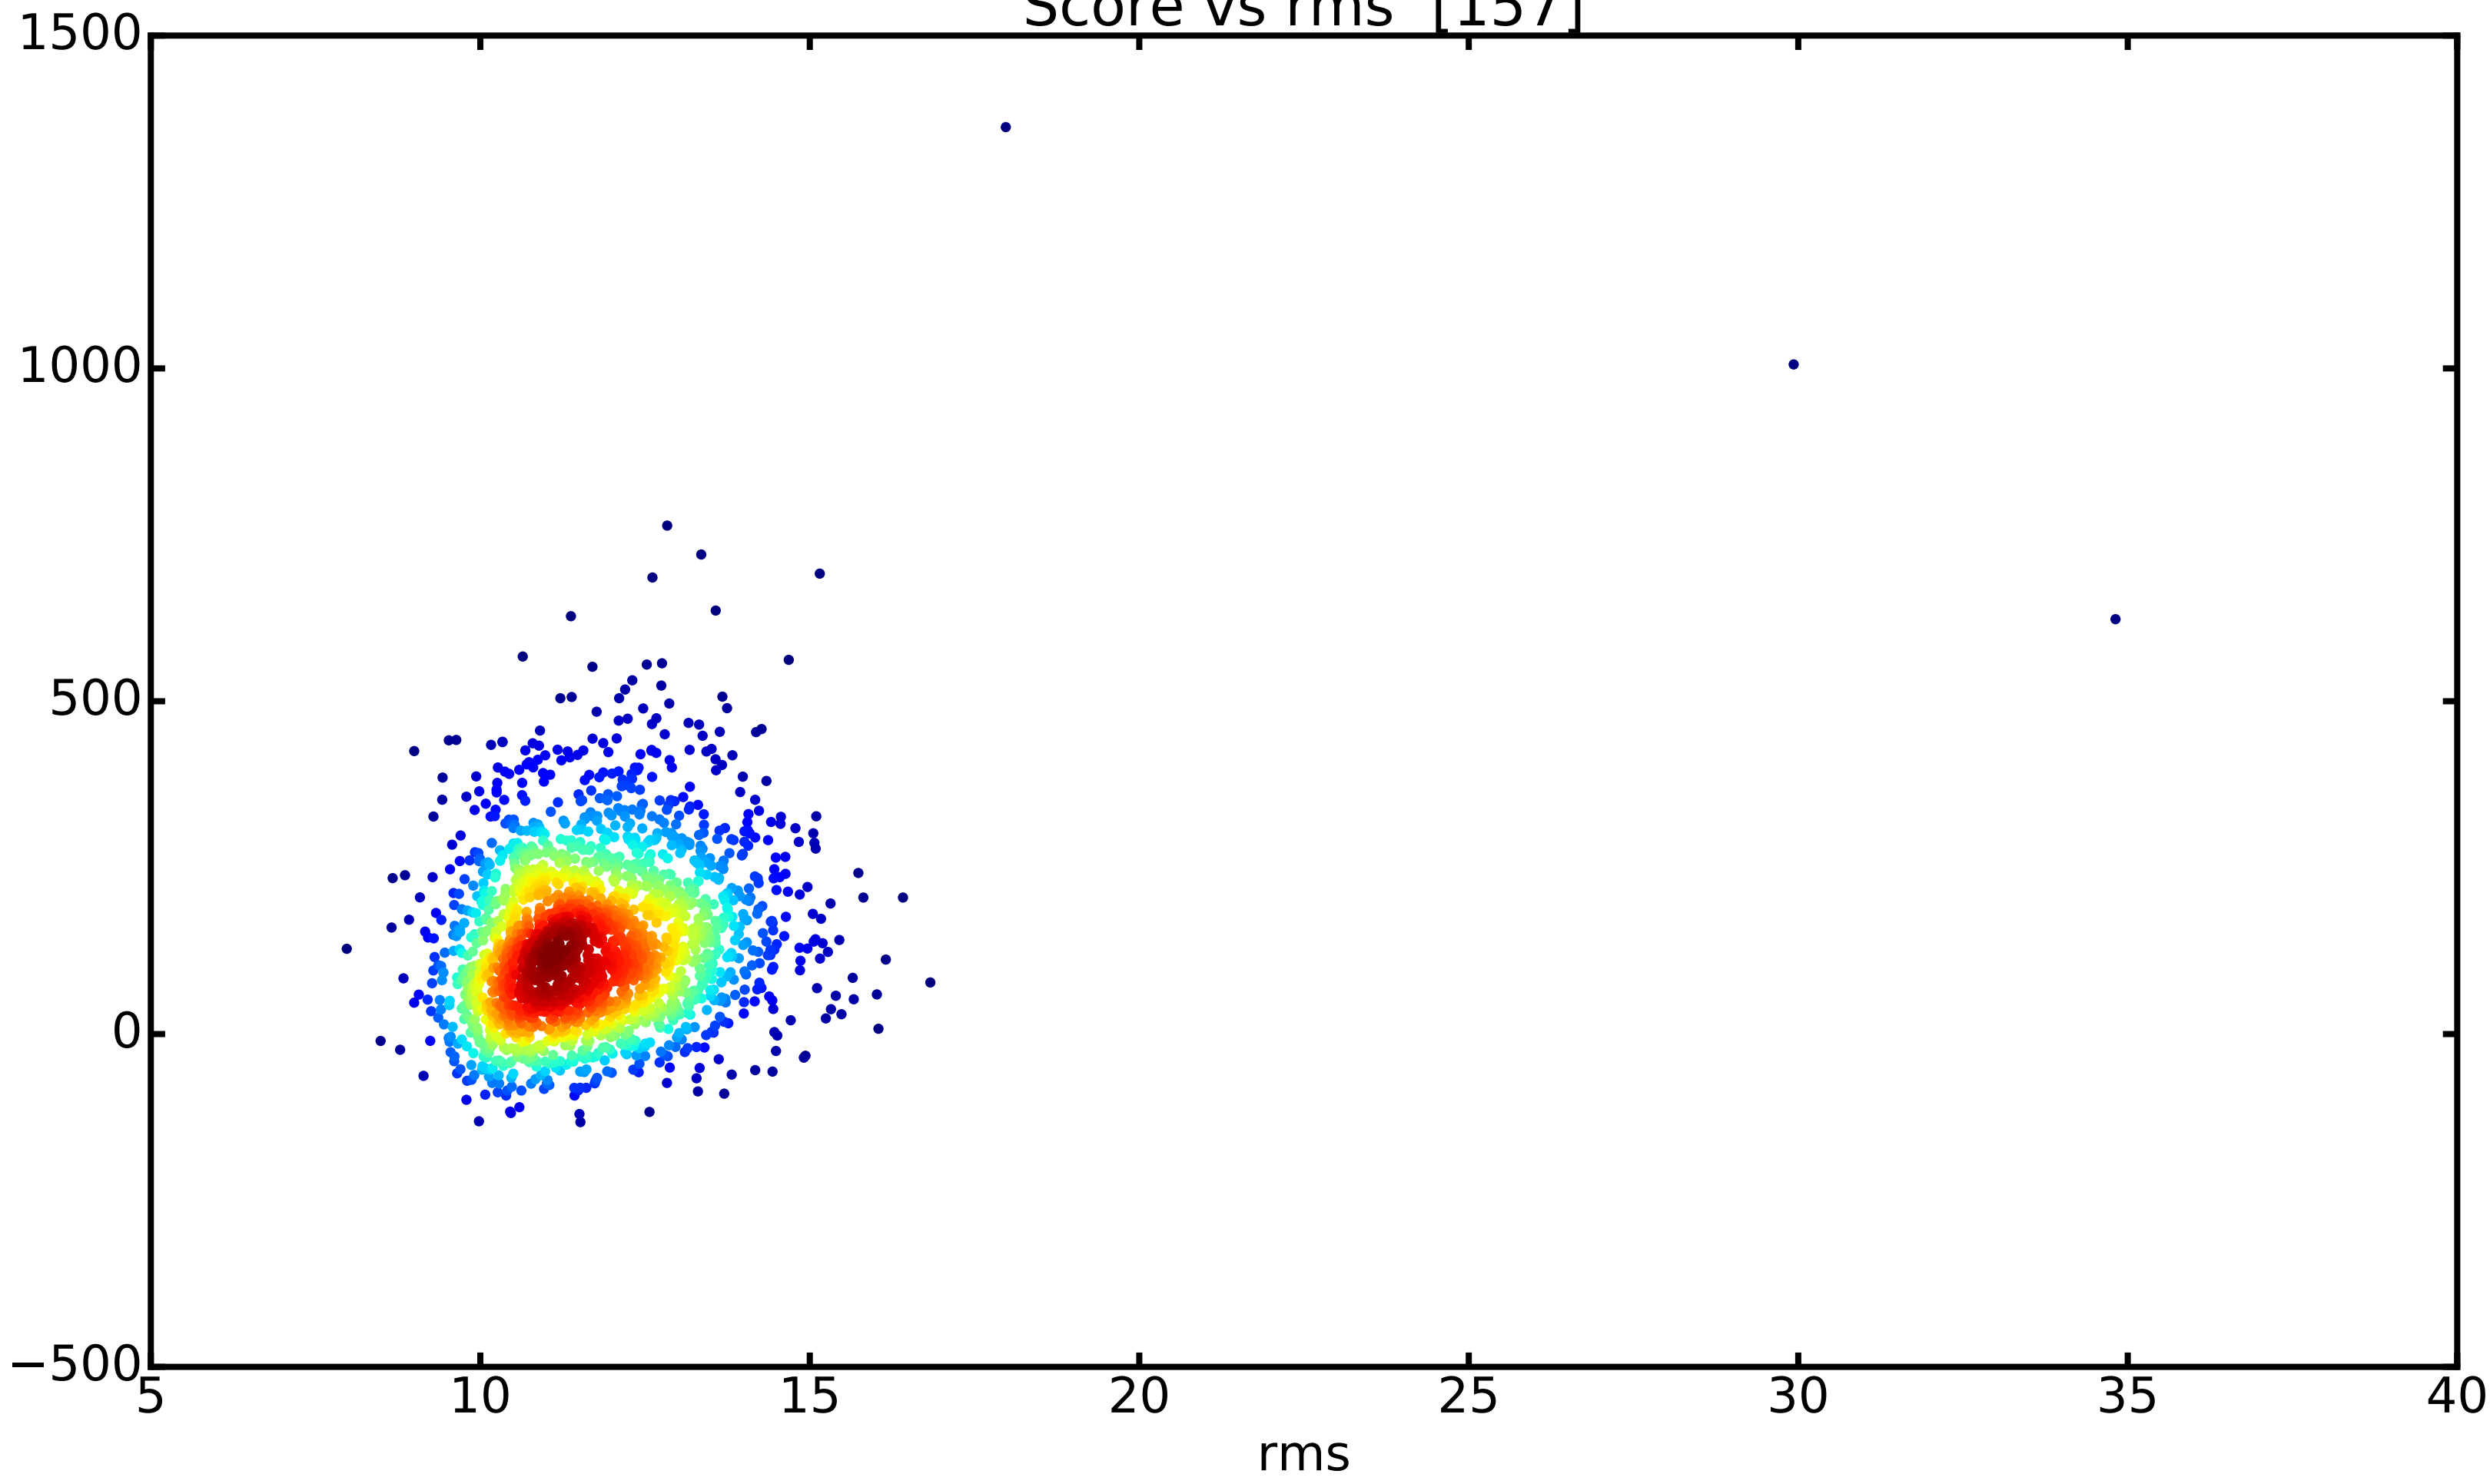

Score vs rms [157]

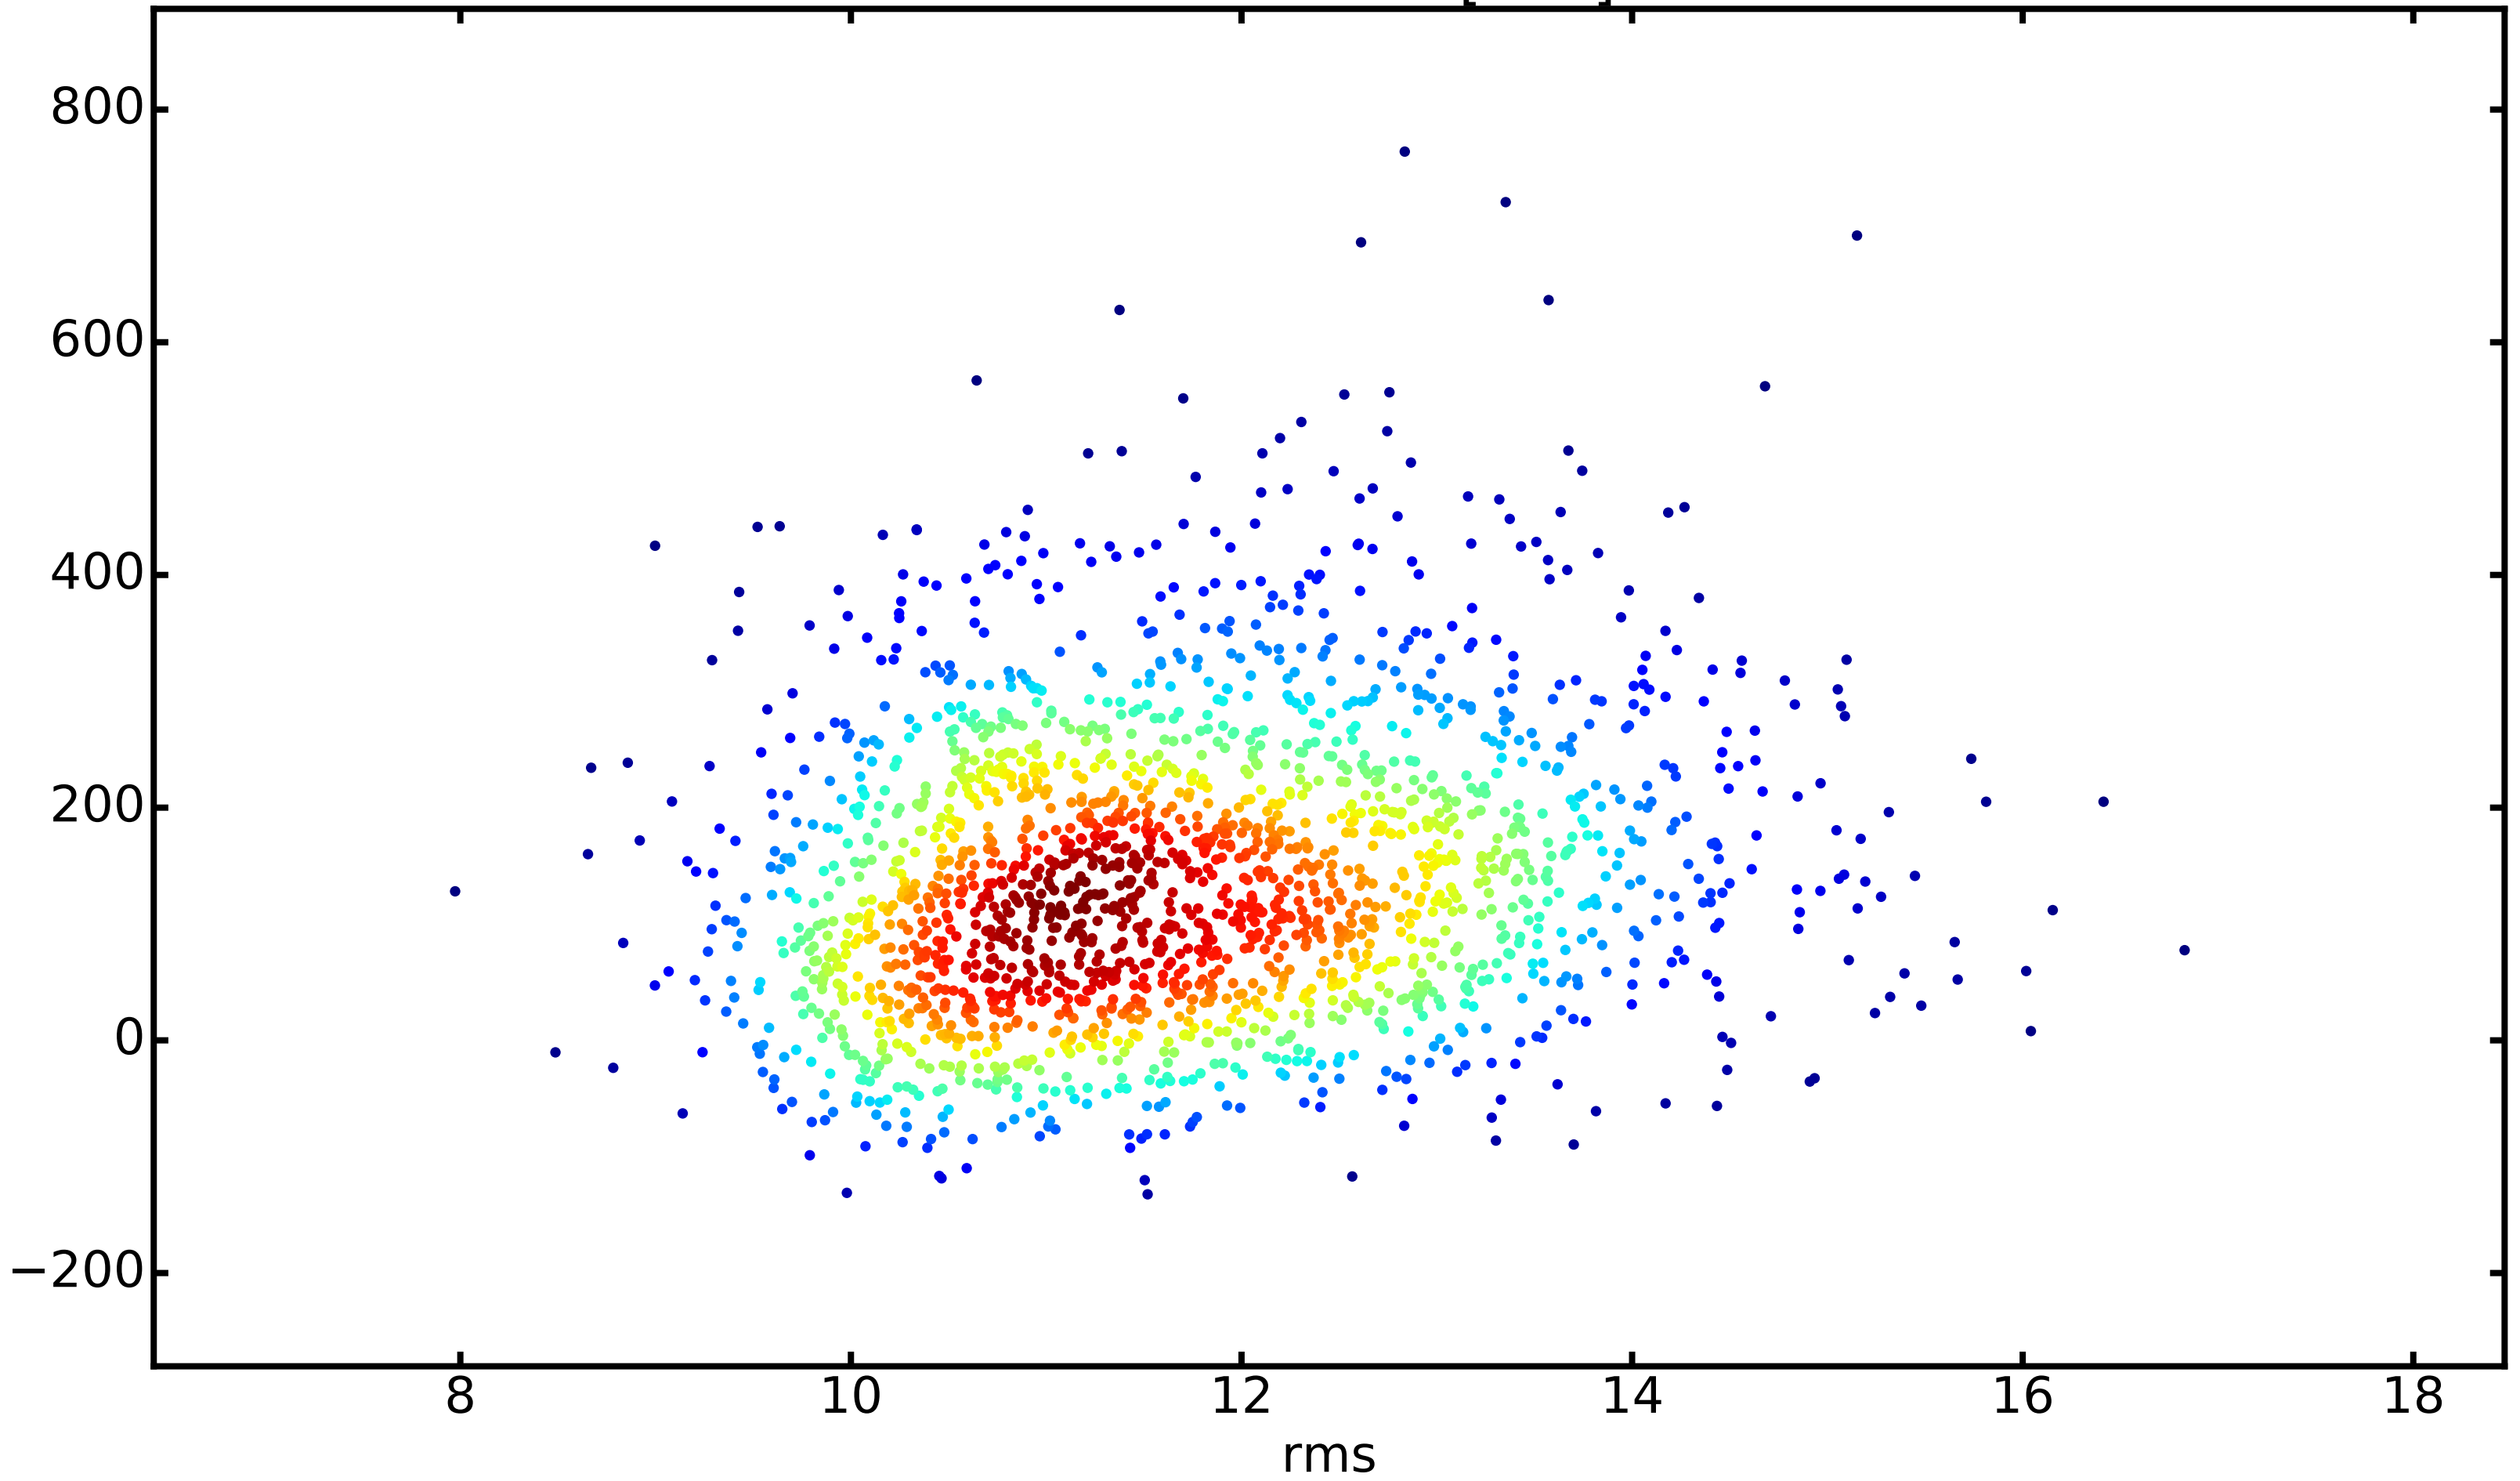

Score vs rms [160]

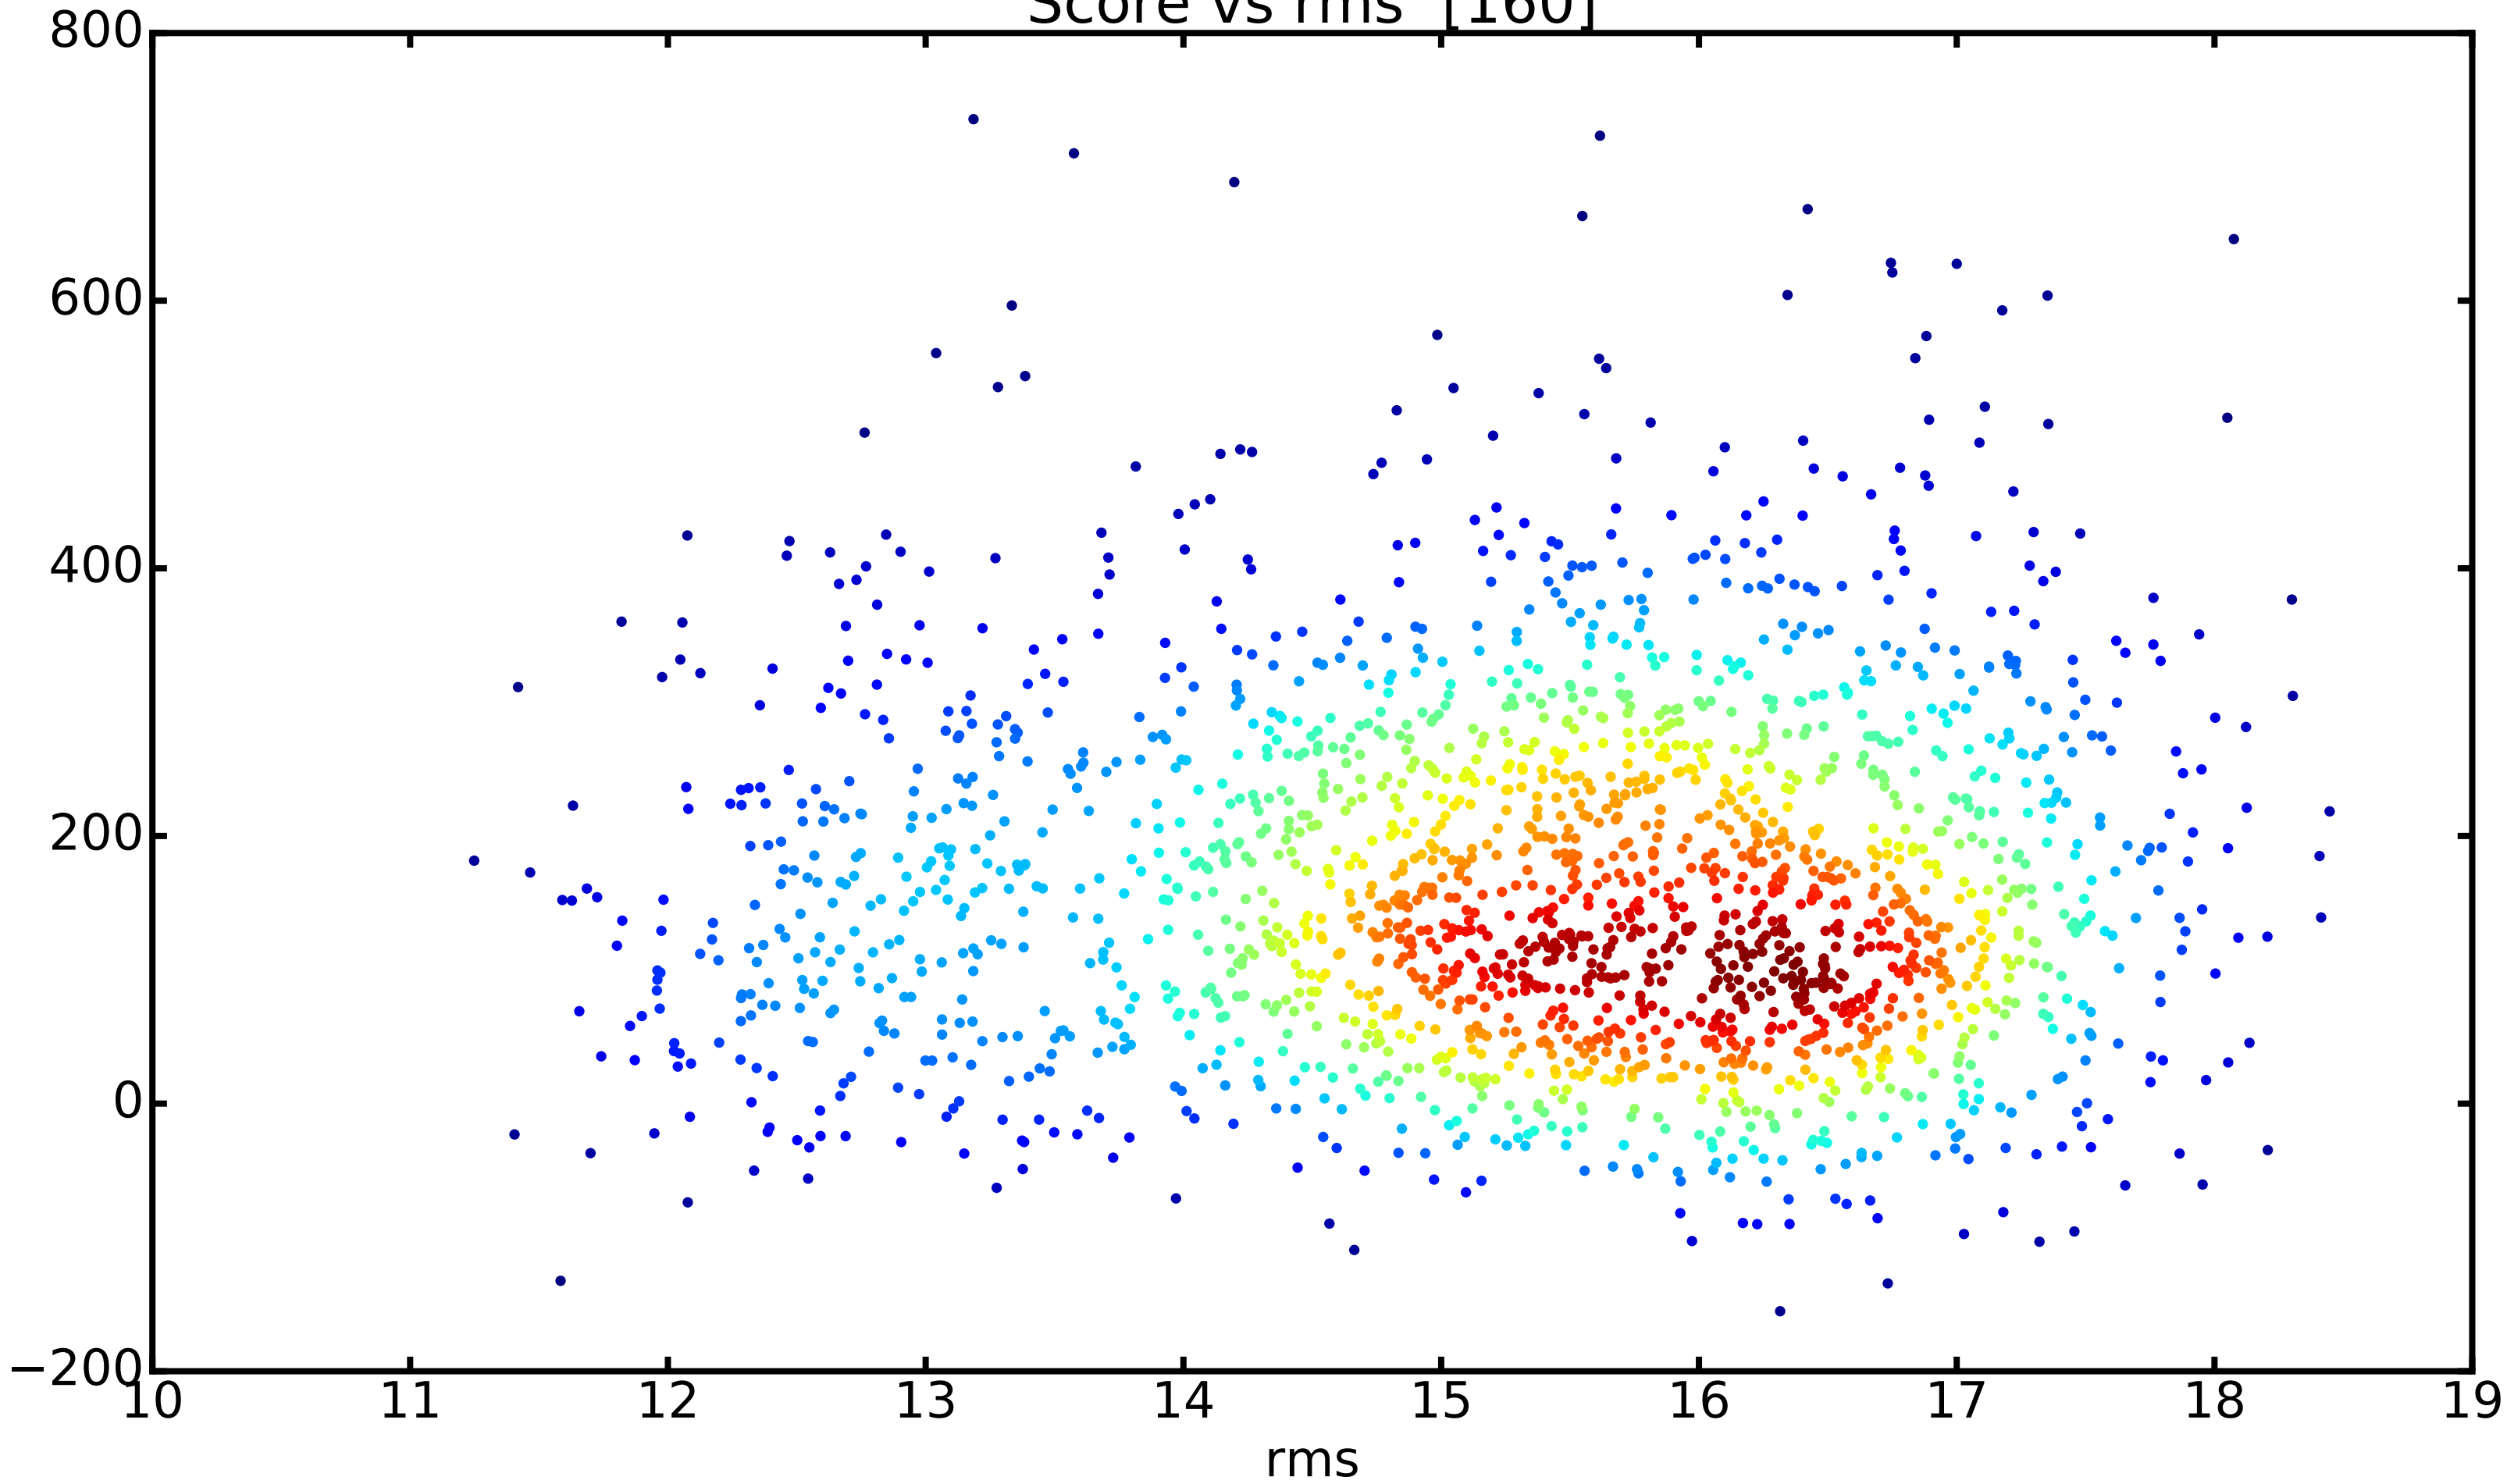

Supplement: NIHMS1507771-supplement-1.pdf [file NIHMS1507771-supplement-1.pdf]
